# Supplementary material for: APOE Expression and Secretion are Modulated by Mitochondrial Dysfunction
Source: bioRxiv preprint, doi:10.1101/2022.05.11.491499, version 3 (2022-12-22)
Supplement: Supplemental Table 1 revised [file 491499_file02.xlsx]

## Sheet: TMT Proteome Data Fig. 1
																								Wild type	Wild type	Wild type	Wild type	Wild type	Wild type	SLC25A1 Null A	SLC25A1 Null A	SLC25A1 Null A	SLC25A1 Null A	SLC25A1 Null B	SLC25A1 Null B	SLC25A1 Null B	SLC25A4 Null	SLC25A4 Null	SLC25A4 Null
												LOG2 AVERAGES			Tukey-HSD P-Values			LOG2 Differences			LOG2 Differences Greater than Mean +/- 2SD			CTL	CTL	CTL	CTL	CTL	CTL	KA1_1	KA1_1	KA1_1	KA1_1	KA1_2	KA1_2	KA1_2	KA4	KA4	KA4
Accession	Gene	Description	Coverage	# Peptides	# PSMs	# Unique Peptides	# Protein Unique Peptides	# Razor Peptides	# AAs	MW [kDa]	ANOVA P-Value	CTL	KA1	KA4	KA1-CTL	KA4-CTL	KA4-KA1	KA1-CTL	KA4-CTL	KA4-KA1	KA1-CTL	KA4-CTL	KA4-KA1	1	1b	2	2b	3	3b	4	4b	5	6	7	8	9	10	11	12
P12235	SLC25A4	ADP/ATP translocase 1 OS=Homo sapiens GN=SLC25A4 PE=1 SV=4	67.1141	26	1166	6	0	0	298	33	5.13614e-16	0.20055	0.311165	-1.43663	0.00373657	4.13114e-12	4.1277e-12	0.110616	-1.63718	-1.7478	0	1	1	0.191111	0.181243	0.225316	0.220789	0.210352	0.174488	0.321025	0.263213	0.289007	0.453409	0.272366	0.267446	0.311692	-1.403	-1.43101	-1.4759
P04222	HLA-C	HLA class I histocompatibility antigen, Cw-3 alpha chain OS=Homo sapiens GN=HLA-C PE=1 SV=2	46.1749	19	89	2	0	18	366	40.8	4.86033e-15	0.168362	-0.240902	0.172766	4.1479e-12	0.936251	4.2375e-12	-0.409264	0.00440397	0.413668	0	0	1	0.156514	0.182719	0.174511	0.172699	0.140974	0.182755	-0.221756	-0.253217	-0.255505	-0.209547	-0.264365	-0.245183	-0.236741	0.190559	0.169438	0.158302
P30486	HLA-B	HLA class I histocompatibility antigen, B-48 alpha chain OS=Homo sapiens GN=HLA-B PE=1 SV=1	46.4088	19	92	4	0	17	362	40.3	1.89885e-14	0.379314	-0.483974	0.263495	4.16367e-12	0.00356391	5.53124e-12	-0.863289	-0.115819	0.74747	1	0	1	0.402941	0.344494	0.403063	0.415909	0.359779	0.349701	-0.494789	-0.502488	-0.374613	-0.500006	-0.489768	-0.514023	-0.512133	0.267948	0.231754	0.290784
P47712	PLA2G4A	Cytosolic phospholipase A2 OS=Homo sapiens GN=PLA2G4A PE=1 SV=2	45.1268	28	140	28	28	0	749	85.2	1.98955e-14	0.376655	-0.234717	-0.0377865	4.15101e-12	5.18854e-11	2.93073e-07	-0.611372	-0.414441	0.196931	1	1	0	0.362979	0.393876	0.393112	0.378319	0.353626	0.378017	-0.27088	-0.250476	-0.17323	-0.220588	-0.215191	-0.270534	-0.242121	-0.0230011	-0.0646766	-0.0256818
O75828	CBR3	Carbonyl reductase [NADPH] 3 OS=Homo sapiens GN=CBR3 PE=1 SV=3	61.0108	16	88	13	13	0	277	30.8	3.4083e-14	0.258955	-0.294025	0.178297	4.17899e-12	0.00259931	7.78777e-12	-0.552979	-0.0806577	0.472322	1	0	1	0.270546	0.223866	0.234791	0.299278	0.286897	0.238351	-0.336077	-0.304668	-0.269431	-0.314008	-0.268974	-0.301478	-0.263536	0.176772	0.170625	0.187494
Q7L266	ASRGL1	Isoaspartyl peptidase/L-asparaginase OS=Homo sapiens GN=ASRGL1 PE=1 SV=2	59.0909	12	89	12	0	0	308	32	1.37099e-13	0.165653	-0.430725	0.432708	5.82245e-12	1.07712e-06	4.32476e-12	-0.596378	0.267055	0.863433	1	0	1	0.121404	0.1977	0.135143	0.171692	0.174882	0.193095	-0.392446	-0.393187	-0.421145	-0.371943	-0.45917	-0.462433	-0.514752	0.431478	0.410442	0.456204
P50416	CPT1A	Carnitine O-palmitoyltransferase 1, liver isoform OS=Homo sapiens GN=CPT1A PE=1 SV=2	46.3131	34	171	34	2	0	773	88.3	1.39118e-13	0.142083	-0.297393	0.289137	4.90341e-12	1.5936e-05	4.40925e-12	-0.439475	0.147055	0.58653	1	0	1	0.141071	0.12694	0.118903	0.174793	0.138315	0.152474	-0.355066	-0.335919	-0.301197	-0.289926	-0.254936	-0.281829	-0.262876	0.286093	0.304074	0.277245
Q9NZI8	IGF2BP1	Insulin-like growth factor 2 mRNA-binding protein 1 OS=Homo sapiens GN=IGF2BP1 PE=1 SV=2	67.591	43	738	38	9	8	577	63.4	2.71865e-13	-0.301099	0.250618	-0.284173	4.37195e-12	0.748776	1.55229e-11	0.551717	0.0169256	-0.534792	1	0	1	-0.314365	-0.29144	-0.329231	-0.261421	-0.266855	-0.343282	0.320043	0.268037	0.240753	0.231259	0.214051	0.255105	0.225079	-0.302517	-0.265885	-0.284118
Q96KN1	FAM84B	Protein FAM84B OS=Homo sapiens GN=FAM84B PE=1 SV=1	21.9355	4	5	4	4	0	310	34.5	2.77505e-13	-0.535888	0.405483	-0.410847	4.31222e-12	0.0157598	4.31051e-11	0.941371	0.125041	-0.81633	1	0	1	-0.560016	-0.444719	-0.658683	-0.507843	-0.511381	-0.532685	0.37135	0.40428	0.348766	0.396733	0.404749	0.417697	0.494805	-0.416813	-0.414623	-0.401106
P53007	SLC25A1	Tricarboxylate transport protein, mitochondrial OS=Homo sapiens GN=SLC25A1 PE=1 SV=2	52.7331	18	108	18	6	0	311	34	3.01881e-13	0.698986	-1.37296	0.623714	4.38927e-12	0.672275	1.7928e-11	-2.07195	-0.0752716	1.99668	1	0	1	0.695162	0.67606	0.713999	0.724464	0.680358	0.70387	-1.48964	-1.49267	-1.14517	-1.13336	-1.29217	-1.48674	-1.57098	0.629539	0.631925	0.609678
Q01581	HMGCS1	Hydroxymethylglutaryl-CoA synthase, cytoplasmic OS=Homo sapiens GN=HMGCS1 PE=1 SV=2	72.5	30	699	30	24	0	520	57.3	3.47297e-13	-0.426733	0.322892	-0.338475	4.35452e-12	0.0351864	4.55508e-11	0.749625	0.0882577	-0.661367	1	0	1	-0.472526	-0.433237	-0.473032	-0.416627	-0.377286	-0.387689	0.315935	0.307774	0.247477	0.325533	0.351058	0.416647	0.295819	-0.348403	-0.348338	-0.318684
Q9NVI1	FANCI	Fanconi anemia group I protein OS=Homo sapiens GN=FANCI PE=1 SV=4	61.4458	77	409	77	5	0	1328	149.2	4.16651e-13	0.142832	-0.138684	0.111003	4.39515e-12	0.0466328	5.17905e-11	-0.281516	-0.0318288	0.249687	0	0	0	0.118091	0.165305	0.138015	0.154495	0.139122	0.141966	-0.140436	-0.150162	-0.133486	-0.101952	-0.145323	-0.142493	-0.156934	0.110721	0.0957112	0.126579
Q9Y2D5-6	AKAP2	Isoform 4 of A-kinase anchor protein 2 OS=Homo sapiens GN=AKAP2	19.0826	17	44	16	0	0	1090	120.6	4.50793e-13	0.425729	-0.46794	0.115194	4.30089e-12	2.79878e-06	1.15202e-09	-0.893669	-0.310536	0.583133	1	1	1	0.387859	0.456476	0.421468	0.443988	0.393139	0.451446	-0.515427	-0.458601	-0.409787	-0.417513	-0.435266	-0.596524	-0.442459	0.158282	0.0868058	0.100493
P35573	AGL	Glycogen debranching enzyme OS=Homo sapiens GN=AGL PE=1 SV=3	69.8433	90	559	90	3	0	1532	174.7	6.39248e-13	0.116833	-0.165253	0.177309	6.63147e-12	0.00198654	7.72804e-12	-0.282086	0.0604763	0.342562	0	0	0	0.11301	0.124904	0.0922679	0.122446	0.118186	0.130183	-0.155625	-0.148161	-0.147003	-0.191498	-0.143421	-0.162151	-0.208914	0.176358	0.166541	0.189028
Q5VZK9	LRRC16A	Leucine-rich repeat-containing protein 16A OS=Homo sapiens GN=LRRC16A PE=1 SV=1	47.4106	53	130	53	2	0	1371	151.5	6.75928e-13	0.0913837	-0.161278	0.201962	1.67231e-11	5.32263e-06	5.18696e-12	-0.252661	0.110578	0.363239	0	0	0	0.0589733	0.107352	0.0963515	0.0963945	0.0879125	0.101319	-0.158084	-0.20296	-0.159795	-0.1569	-0.140926	-0.150788	-0.15949	0.203543	0.178201	0.224141
Q2TAA2	IAH1	Isoamyl acetate-hydrolyzing esterase 1 homolog OS=Homo sapiens GN=IAH1 PE=1 SV=1	28.2258	6	14	6	0	0	248	27.6	9.21131e-13	0.852329	-0.508251	-0.435703	4.69091e-12	6.34731e-11	0.461251	-1.36058	-1.28803	0.0725475	1	1	0	0.814571	0.842702	0.908262	0.836505	0.818302	0.893629	-0.517826	-0.629251	-0.401747	-0.330827	-0.544298	-0.58097	-0.552839	-0.38158	-0.557129	-0.368401
F8WD26	LMO7	LIM domain only protein 7 OS=Homo sapiens GN=LMO7 PE=1 SV=2	57.8173	79	285	1	0	106	1631	186.1	9.41896e-13	0.272121	-0.158945	-0.0673307	4.47697e-12	3.73206e-10	0.000611104	-0.431066	-0.339452	0.0916148	1	1	0	0.25542	0.276172	0.288086	0.28631	0.27035	0.256387	-0.200522	-0.201399	-0.145378	-0.118658	-0.124879	-0.183553	-0.13823	-0.053438	-0.0649063	-0.0836478
Q15293	RCN1	Reticulocalbin-1 OS=Homo sapiens GN=RCN1 PE=1 SV=1	67.9758	22	432	22	3	0	331	38.9	9.80933e-13	-0.315708	0.248797	-0.26563	4.85545e-12	0.16359	9.22908e-11	0.564505	0.0500779	-0.514428	1	0	1	-0.328151	-0.30386	-0.359389	-0.294133	-0.277038	-0.331679	0.195368	0.195236	0.215936	0.284386	0.281669	0.284937	0.284048	-0.284929	-0.24137	-0.270592
Q9H3H9	TCEAL2	Transcription elongation factor A protein-like 2 OS=Homo sapiens GN=TCEAL2 PE=2 SV=1	40.5286	8	21	4	4	0	227	25.8	9.91018e-13	0.0470572	-1.06038	0.966983	1.93469e-10	3.21896e-08	4.67359e-12	-1.10743	0.919925	2.02736	1	1	1	-0.00347292	0.111462	0.0134366	0.105956	0.0524243	0.00253725	-1.20134	-1.00726	-1.01547	-1.23587	-0.814044	-1.02399	-1.12468	0.937588	1.01209	0.95127
A0A0A0MQT0	RBP1	Retinol binding protein 1, cellular OS=Homo sapiens GN=RBP1 PE=1 SV=1	52.2843	11	75	11	0	0	197	22.3	1.07213e-12	0.380056	-0.375893	0.186129	4.56124e-12	0.000157571	6.60255e-10	-0.755949	-0.193927	0.562022	1	0	1	0.346653	0.358072	0.414971	0.419064	0.358544	0.383033	-0.315285	-0.328404	-0.350295	-0.364505	-0.365296	-0.446475	-0.460989	0.148449	0.168836	0.241103
Q9UEW8	STK39	STE20/SPS1-related proline-alanine-rich protein kinase OS=Homo sapiens GN=STK39 PE=1 SV=3	49.5413	21	206	16	0	0	545	59.4	1.17387e-12	0.173186	-0.258598	0.285595	1.17539e-11	0.000680761	9.98268e-12	-0.431784	0.112409	0.544193	1	0	1	0.17426	0.196453	0.159571	0.180663	0.161922	0.166248	-0.254941	-0.201361	-0.22906	-0.241864	-0.262053	-0.28962	-0.331283	0.255798	0.311379	0.289609
Q96PU5	NEDD4L	E3 ubiquitin-protein ligase NEDD4-like OS=Homo sapiens GN=NEDD4L PE=1 SV=2	43.2821	36	120	28	0	0	975	111.9	1.5284e-12	0.198242	-0.278447	0.286425	1.06508e-11	0.00885012	1.77267e-11	-0.476689	0.0881827	0.564872	1	0	1	0.17541	0.216806	0.168304	0.190898	0.199498	0.238535	-0.322308	-0.279254	-0.300377	-0.280669	-0.202988	-0.317188	-0.246343	0.320478	0.270314	0.268483
Q9HB58-6	SP110	Isoform 6 of Sp110 nuclear body protein OS=Homo sapiens GN=SP110	16.9705	9	19	9	0	0	713	81.1	1.99709e-12	0.472474	-0.687185	0.382596	6.07003e-12	0.277069	1.61215e-10	-1.15966	-0.0898782	1.06978	1	0	1	0.552066	0.422782	0.434611	0.477242	0.523604	0.42454	-0.597896	-0.825483	-0.652549	-0.544165	-0.755292	-0.735132	-0.699778	0.395992	0.446277	0.305519
Q9NVS2-2	MRPS18A	Isoform 2 of 28S ribosomal protein S18a, mitochondrial OS=Homo sapiens GN=MRPS18A	37.037	10	38	10	0	0	270	30.5	2.14604e-12	0.254679	-0.113334	-0.113566	6.28086e-12	8.75845e-11	0.999902	-0.368013	-0.368245	-0.000231873	0	1	0	0.247913	0.220357	0.278933	0.25696	0.2577	0.266211	-0.143626	-0.128232	-0.0978667	-0.137203	-0.0705634	-0.133744	-0.0821013	-0.0859246	-0.127869	-0.126903
Q8IZH2	XRN1	5'-3' exoribonuclease 1 OS=Homo sapiens GN=XRN1 PE=1 SV=1	40.1524	59	224	59	0	0	1706	194	2.43485e-12	0.168334	-0.149872	0.081647	5.23881e-12	0.000158889	1.7577e-09	-0.318207	-0.0866874	0.231519	0	0	0	0.157638	0.147756	0.185474	0.182389	0.162805	0.173944	-0.142569	-0.125965	-0.145427	-0.112862	-0.153206	-0.175946	-0.19313	0.0878182	0.078473	0.0786498
Q14894	CRYM	Ketimine reductase mu-crystallin OS=Homo sapiens GN=CRYM PE=1 SV=1	53.1847	12	35	12	1	0	314	33.8	2.69279e-12	0.211539	-0.39532	0.387938	2.94433e-11	0.000509209	1.80165e-11	-0.606859	0.176399	0.783258	1	0	1	0.183784	0.189009	0.281195	0.259778	0.173325	0.182142	-0.364531	-0.346342	-0.477509	-0.350482	-0.349281	-0.415429	-0.463667	0.381512	0.378016	0.404285
Q9BWD1	ACAT2	Acetyl-CoA acetyltransferase, cytosolic OS=Homo sapiens GN=ACAT2 PE=1 SV=2	85.6423	24	546	24	2	0	397	41.3	2.82517e-12	-0.242243	0.230999	-0.135268	5.71687e-12	0.00103569	1.07975e-09	0.473242	0.106976	-0.366267	1	0	1	-0.290063	-0.209538	-0.265377	-0.239659	-0.235201	-0.213623	0.244675	0.250233	0.223566	0.213031	0.234462	0.28528	0.165746	-0.124705	-0.148418	-0.13268
Q14678	KANK1	KN motif and ankyrin repeat domain-containing protein 1 OS=Homo sapiens GN=KANK1 PE=1 SV=3	50.2959	48	147	46	3	2	1352	147.2	3.12367e-12	-0.283861	0.116124	0.0468092	5.79292e-12	6.84607e-10	0.00677817	0.399986	0.330671	-0.0693149	0	1	0	-0.288528	-0.312131	-0.32092	-0.243325	-0.26156	-0.276703	0.0960675	0.142785	0.0939848	0.10529	0.110356	0.114384	0.150003	0.0449306	0.0808559	0.0146412
Q2Q1W2	TRIM71	E3 ubiquitin-protein ligase TRIM71 OS=Homo sapiens GN=TRIM71 PE=1 SV=1	56.7972	33	97	33	33	0	868	93.3	3.97322e-12	-0.603276	0.412756	-0.508087	8.62976e-12	0.192172	3.49332e-10	1.01603	0.0951895	-0.920843	1	0	1	-0.604858	-0.637676	-0.652439	-0.561184	-0.555449	-0.608053	0.429836	0.439263	0.318026	0.240656	0.457628	0.488573	0.51531	-0.518985	-0.463762	-0.541514
P53396	ACLY	ATP-citrate synthase OS=Homo sapiens GN=ACLY PE=1 SV=3	65.9401	72	1304	1	1	120	1101	120.8	3.98527e-12	-0.193858	0.18102	-0.242608	1.95614e-11	0.0793127	6.27656e-11	0.374878	-0.0487498	-0.423628	0	0	1	-0.203224	-0.196638	-0.221828	-0.166937	-0.160212	-0.21431	0.201599	0.183943	0.145984	0.133702	0.214488	0.2267	0.160726	-0.254606	-0.23872	-0.234498
O43920	NDUFS5	NADH dehydrogenase [ubiquinone] iron-sulfur protein 5 OS=Homo sapiens GN=NDUFS5 PE=1 SV=3	57.5472	6	35	6	6	0	106	12.5	4.69532e-12	0.200323	-0.160842	0.0749356	6.28753e-12	2.05529e-05	1.08332e-08	-0.361165	-0.125388	0.235778	0	0	0	0.170515	0.173801	0.217366	0.229773	0.186113	0.224371	-0.170332	-0.19511	-0.135768	-0.169606	-0.161674	-0.148241	-0.145163	0.0832777	0.0394281	0.102101
Q9UHN6	TMEM2	Transmembrane protein 2 OS=Homo sapiens GN=TMEM2 PE=1 SV=1	34.2733	40	140	40	0	0	1383	154.3	5.00223e-12	-0.29987	0.229399	-0.219664	8.78397e-12	0.0264388	7.6574e-10	0.529268	0.0802052	-0.449063	1	0	1	-0.329647	-0.305435	-0.31581	-0.271807	-0.284369	-0.292149	0.19495	0.178646	0.161977	0.236551	0.257936	0.280946	0.294785	-0.204166	-0.225884	-0.228943
P18858	LIG1	DNA ligase 1 OS=Homo sapiens GN=LIG1 PE=1 SV=1	70.5114	61	357	5	0	68	919	101.7	5.14863e-12	0.121567	-0.134336	0.0867421	9.31233e-12	0.0477012	6.68381e-10	-0.255903	-0.0348247	0.221078	0	0	0	0.0972233	0.117681	0.116675	0.124862	0.136037	0.136923	-0.14314	-0.142308	-0.129078	-0.178993	-0.120467	-0.111244	-0.115123	0.0939996	0.080817	0.0854098
Q12873-3	CHD3	Isoform 3 of Chromodomain-helicase-DNA-binding protein 3 OS=Homo sapiens GN=CHD3	49.83	84	398	60	0	7	2059	232.9	5.77479e-12	0.187547	-0.181583	0.0677607	7.15328e-12	5.04625e-05	9.04846e-09	-0.369129	-0.119786	0.249343	0	0	0	0.17094	0.164008	0.174557	0.21882	0.193876	0.20308	-0.172122	-0.156489	-0.163299	-0.143064	-0.186429	-0.223265	-0.22641	0.0702496	0.0731006	0.0599321
Q9BXA9-2	SALL3	Isoform 1 of Sal-like protein 3 OS=Homo sapiens GN=SALL3	25.9772	25	78	17	0	9	1228	127.3	6.59081e-12	-0.2667	0.132016	-0.0034185	7.09954e-12	1.59721e-08	2.42912e-05	0.398716	0.263281	-0.135435	0	0	0	-0.266642	-0.2977	-0.291093	-0.256657	-0.22711	-0.260995	0.158335	0.145456	0.113203	0.17961	0.0823769	0.11608	0.129051	0.00235639	0.010405	-0.0230169
O00151	PDLIM1	PDZ and LIM domain protein 1 OS=Homo sapiens GN=PDLIM1 PE=1 SV=4	79.6353	19	320	18	18	0	329	36	6.66833e-12	0.311544	-0.275585	0.0989414	7.47558e-12	1.7252e-05	1.96985e-08	-0.587129	-0.212602	0.374527	1	0	1	0.283708	0.303386	0.306541	0.338238	0.315602	0.321789	-0.268828	-0.266106	-0.246026	-0.185527	-0.272573	-0.321377	-0.368658	0.116738	0.0826435	0.0974432
Q02952	AKAP12	A-kinase anchor protein 12 OS=Homo sapiens GN=AKAP12 PE=1 SV=4	77.9461	113	1295	113	4	0	1782	191.4	7.86886e-12	-0.419274	0.236532	-0.170885	8.1618e-12	1.20159e-05	3.10583e-08	0.655806	0.248389	-0.407417	1	0	1	-0.448113	-0.397655	-0.468941	-0.39755	-0.374568	-0.428817	0.283035	0.275517	0.222746	0.109622	0.239271	0.262433	0.263103	-0.190251	-0.157912	-0.16449
Q9Y320	TMX2	Thioredoxin-related transmembrane protein 2 OS=Homo sapiens GN=TMX2 PE=1 SV=1	37.8378	14	65	14	0	0	296	34	7.98813e-12	-0.536274	0.297481	-0.224916	8.28848e-12	1.4243e-05	2.86321e-08	0.833755	0.311358	-0.522397	1	1	1	-0.568421	-0.540077	-0.547275	-0.5626	-0.475197	-0.524076	0.269247	0.232882	0.172507	0.330036	0.294164	0.374282	0.409249	-0.224257	-0.219103	-0.231388
P02751	FN1	Fibronectin OS=Homo sapiens GN=FN1 PE=1 SV=4	32.6907	54	184	54	0	0	2386	262.5	8.43104e-12	-0.616068	0.241552	0.0909191	1.03554e-11	1.77287e-09	0.0104152	0.85762	0.706987	-0.150633	1	1	0	-0.685732	-0.618096	-0.603625	-0.564394	-0.652085	-0.572475	0.276475	0.294327	0.106326	0.334555	0.19817	0.189359	0.291651	0.089695	0.122974	0.0600884
Q16666	IFI16	Gamma-interferon-inducible protein 16 OS=Homo sapiens GN=IFI16 PE=1 SV=3	27.5159	18	45	18	0	0	785	88.2	9.34373e-12	1.18024	-0.850702	-0.980327	2.38468e-11	2.10812e-10	0.485817	-2.03095	-2.16057	-0.129625	1	1	0	1.17646	1.1665	1.19588	1.23125	1.14887	1.16251	-1.04013	-1.11086	-0.582056	-0.61092	-0.771147	-1.03239	-0.807406	-0.842872	-1.15654	-0.941574
P30084	ECHS1	Enoyl-CoA hydratase, mitochondrial OS=Homo sapiens GN=ECHS1 PE=1 SV=4	69.3103	17	314	17	17	0	290	31.4	9.53496e-12	-0.22958	0.130911	-0.0873348	9.17943e-12	8.92654e-06	4.9815e-08	0.360491	0.142245	-0.218246	0	0	0	-0.273872	-0.216118	-0.247193	-0.230172	-0.206671	-0.203452	0.128586	0.128428	0.107115	0.183984	0.120732	0.1418	0.105731	-0.100228	-0.0633874	-0.0983886
F5H5R8	NAT1	Arylamine N-acetyltransferase 1 OS=Homo sapiens GN=NAT1 PE=1 SV=1	26.9886	6	11	6	0	0	352	40.8	9.66515e-12	0.258457	-0.126464	-0.117373	1.77092e-11	4.27775e-10	0.896627	-0.384921	-0.37583	0.00909062	0	1	0	0.290719	0.229008	0.226791	0.253071	0.281941	0.26921	-0.111372	-0.150642	-0.140859	-0.0694872	-0.152538	-0.102283	-0.158066	-0.135843	-0.0901027	-0.126174
P31930	UQCRC1	Cytochrome b-c1 complex subunit 1, mitochondrial OS=Homo sapiens GN=UQCRC1 PE=1 SV=3	71.25	29	320	28	28	1	480	52.6	1.03698e-11	0.275067	-0.116444	-0.0900565	1.637e-11	6.73085e-10	0.428399	-0.391511	-0.365124	0.0263876	0	1	0	0.263882	0.259169	0.3095	0.303496	0.217468	0.296889	-0.126155	-0.122413	-0.11612	-0.0880831	-0.124413	-0.16506	-0.072865	-0.0942095	-0.0815481	-0.0944119
Q8NEF9	SRFBP1	Serum response factor-binding protein 1 OS=Homo sapiens GN=SRFBP1 PE=1 SV=1	42.6573	18	78	18	18	0	429	48.6	1.05493e-11	-0.215877	0.137457	-0.0675441	9.66538e-12	4.82367e-06	8.85195e-08	0.353334	0.148333	-0.205001	0	0	0	-0.24114	-0.188889	-0.222316	-0.229337	-0.195235	-0.218344	0.171703	0.117218	0.130845	0.180336	0.0826321	0.137648	0.141815	-0.0664536	-0.0659902	-0.0701883
O43181	NDUFS4	NADH dehydrogenase [ubiquinone] iron-sulfur protein 4, mitochondrial OS=Homo sapiens GN=NDUFS4 PE=1 SV=1	35.4286	7	51	7	4	0	175	20.1	1.08047e-11	0.265015	-0.208708	0.0278079	9.40559e-12	6.40491e-07	4.99779e-07	-0.473723	-0.237207	0.236516	1	0	0	0.254514	0.188759	0.299932	0.297913	0.270616	0.278356	-0.228076	-0.236955	-0.204622	-0.167456	-0.159417	-0.222793	-0.241634	0.0362268	0.0300857	0.0171112
Q9H568	ACTL8	Actin-like protein 8 OS=Homo sapiens GN=ACTL8 PE=2 SV=1	59.0164	14	73	14	14	0	366	41.3	1.34955e-11	0.982039	-0.54316	-0.708777	4.14505e-11	2.17635e-10	0.172636	-1.5252	-1.69082	-0.165617	1	1	0	1.10346	0.864581	0.984515	1.01857	0.995529	0.925582	-0.639459	-0.664911	-0.388991	-0.329055	-0.514556	-0.693297	-0.571854	-0.573182	-0.887582	-0.665568
A2RUF3	SRGAP2	SLIT-ROBO Rho GTPase activating protein 2 OS=Homo sapiens GN=SRGAP2 PE=1 SV=1	49.9533	43	176	26	0	23	1071	120.8	1.722e-11	0.176039	-0.117936	0.0181566	1.36856e-11	4.32497e-07	1.79095e-06	-0.293975	-0.157883	0.136093	0	0	0	0.168575	0.160316	0.166077	0.202692	0.173854	0.184721	-0.0967721	-0.105849	-0.0747785	-0.11289	-0.132027	-0.148169	-0.155066	0.0173072	0.0103023	0.0268602
P08240	SRPR	Signal recognition particle receptor subunit alpha OS=Homo sapiens GN=SRPR PE=1 SV=2	68.3386	43	437	43	1	0	638	69.8	2.08851e-11	-0.250202	0.172059	-0.137916	2.26672e-11	0.000921781	1.28006e-08	0.422261	0.112286	-0.309975	0	0	0	-0.273941	-0.233499	-0.274969	-0.237014	-0.226563	-0.255228	0.128774	0.131753	0.129254	0.197024	0.187832	0.189614	0.240159	-0.147905	-0.114931	-0.150914
A0A087WXC5	NDUFA10	NADH dehydrogenase [ubiquinone] 1 alpha subcomplex subunit 10, mitochondrial OS=Homo sapiens GN=NDUFA10 PE=1 SV=1	50.9859	18	108	18	0	0	355	40.8	2.2571e-11	0.206703	-0.171058	0.0393561	1.82568e-11	5.05092e-06	2.83887e-07	-0.377761	-0.167347	0.210414	0	0	0	0.177993	0.219771	0.201125	0.249423	0.222276	0.16963	-0.203003	-0.208118	-0.16925	-0.126963	-0.135013	-0.165789	-0.189268	0.0324952	0.0569012	0.0286721
P09525	ANXA4	Annexin A4 OS=Homo sapiens GN=ANXA4 PE=1 SV=4	86.2069	29	172	28	1	1	319	35.9	2.28699e-11	0.199735	-0.227318	0.11892	3.05571e-11	0.0136482	5.02784e-09	-0.427053	-0.0808152	0.346238	1	0	0	0.179241	0.221879	0.208749	0.227581	0.181821	0.179138	-0.210421	-0.21145	-0.201679	-0.247517	-0.177545	-0.230455	-0.312161	0.117303	0.0933933	0.146062
Q16513	PKN2	Serine/threonine-protein kinase N2 OS=Homo sapiens GN=PKN2 PE=1 SV=1	55.5894	53	294	1	0	69	984	112	2.54264e-11	0.0759661	-0.0987732	0.0701849	5.91326e-11	0.845933	1.11132e-09	-0.174739	-0.00578118	0.168958	0	0	0	0.0609697	0.0859888	0.0617344	0.0831187	0.0815658	0.0824191	-0.100199	-0.0995522	-0.115055	-0.0769014	-0.0887243	-0.106276	-0.104705	0.0659879	0.0477109	0.096856
Q5JSH3	WDR44	WD repeat-containing protein 44 OS=Homo sapiens GN=WDR44 PE=1 SV=1	70.7558	53	262	53	0	0	913	101.3	2.55367e-11	0.160404	-0.200212	0.141462	5.50026e-11	0.658344	1.32134e-09	-0.360616	-0.0189424	0.341673	0	0	0	0.131232	0.170734	0.161399	0.18538	0.167218	0.146462	-0.221474	-0.214001	-0.25286	-0.216874	-0.129709	-0.164722	-0.201845	0.133138	0.14116	0.150086
Q9H9Z2	LIN28A	Protein lin-28 homolog A OS=Homo sapiens GN=LIN28A PE=1 SV=1	73.2057	13	114	11	11	0	209	22.7	2.72485e-11	-1.89915	0.757723	-1.43527	3.8057e-11	0.0244039	4.99628e-09	2.65688	0.463881	-2.193	1	1	1	-1.76057	-2.14577	-2.19797	-1.58092	-1.59074	-2.11895	0.722941	0.628585	0.573754	0.6552	0.859434	0.957532	0.906613	-1.54723	-1.23558	-1.52302
Q9UNH6-3	SNX7	Isoform 3 of Sorting nexin-7 OS=Homo sapiens GN=SNX7	38.3592	19	41	19	0	0	451	51.6	2.87932e-11	0.166756	-0.172699	0.111065	4.15767e-11	0.0354866	4.65649e-09	-0.339455	-0.0556906	0.283765	0	0	0	0.158182	0.138565	0.180375	0.179094	0.167562	0.176756	-0.166114	-0.149818	-0.148023	-0.125058	-0.185227	-0.204263	-0.230392	0.134774	0.098387	0.100034
E9PC62	CELF2	CUGBP Elav-like family member 2 OS=Homo sapiens GN=CELF2 PE=1 SV=1	45.8733	21	145	15	1	0	521	55.7	3.0409e-11	-0.546978	0.381169	-0.429015	4.96664e-11	0.116021	3.24641e-09	0.928147	0.117962	-0.810185	1	0	1	-0.501968	-0.613642	-0.656503	-0.513456	-0.471392	-0.524905	0.419868	0.475714	0.397071	0.208106	0.374487	0.392246	0.400694	-0.465109	-0.345509	-0.476428
P40306	PSMB10	Proteasome subunit beta type-10 OS=Homo sapiens GN=PSMB10 PE=1 SV=1	3.663	1	2	1	1	0	273	28.9	3.12217e-11	0.427042	-0.419094	0.328137	5.28265e-11	0.157136	2.98876e-09	-0.846136	-0.0989051	0.747231	1	0	1	0.302466	0.476016	0.476793	0.423646	0.430425	0.452907	-0.336594	-0.447786	-0.356518	-0.489052	-0.484899	-0.418013	-0.400797	0.43423	0.220438	0.329743
Q9H3M7	TXNIP	Thioredoxin-interacting protein OS=Homo sapiens GN=TXNIP PE=1 SV=1	36.8286	9	27	9	4	0	391	43.6	3.69913e-11	0.432215	-0.230254	-0.105197	3.99281e-11	8.78716e-09	0.0135848	-0.662469	-0.537411	0.125057	1	1	0	0.43053	0.426669	0.521704	0.467302	0.330818	0.416266	-0.265605	-0.215862	-0.17921	-0.250468	-0.169381	-0.319926	-0.211325	-0.0877588	-0.139394	-0.0884364
Q06787-8	FMR1	Isoform 8 of Fragile X mental retardation protein 1 OS=Homo sapiens GN=FMR1	69.1126	42	338	4	0	51	586	66.2	3.71773e-11	0.0695919	-0.0800096	0.0540862	6.57409e-11	0.234016	3.0876e-09	-0.149602	-0.0155057	0.134096	0	0	0	0.0605203	0.0669787	0.0613958	0.0556842	0.0792175	0.093755	-0.0691913	-0.0678158	-0.0992804	-0.0751535	-0.0702544	-0.0831779	-0.0951941	0.0578776	0.0577452	0.0466357
O15075	DCLK1	Serine/threonine-protein kinase DCLK1 OS=Homo sapiens GN=DCLK1 PE=1 SV=2	56.0811	34	150	13	0	24	740	82.2	3.91826e-11	0.23835	-0.344063	0.283828	1.42136e-10	0.46385	7.21185e-10	-0.582413	0.0454782	0.627891	1	0	1	0.242756	0.220771	0.217651	0.268491	0.249501	0.230931	-0.283514	-0.280979	-0.292655	-0.279336	-0.416137	-0.425063	-0.430755	0.289588	0.263627	0.29827
P01892	HLA-A	HLA class I histocompatibility antigen, A-2 alpha chain OS=Homo sapiens GN=HLA-A PE=1 SV=1	67.1233	26	211	22	1	5	365	40.9	3.97836e-11	0.233642	-0.175727	0.0907706	3.59978e-11	0.000106851	8.58305e-08	-0.409369	-0.142871	0.266497	0	0	0	0.21916	0.254063	0.269492	0.219286	0.215511	0.22434	-0.175021	-0.181489	-0.183923	-0.114961	-0.222809	-0.22182	-0.130063	0.0865359	0.0650811	0.120695
A0A0C4DFM7	ZCCHC11	Terminal uridylyltransferase 4 OS=Homo sapiens GN=ZCCHC11 PE=4 SV=1	38.6018	59	157	55	0	4	1645	185.1	4.11799e-11	0.140944	-0.093412	0.0194738	3.1536e-11	1.43258e-06	2.48463e-06	-0.234356	-0.12147	0.112886	0	0	0	0.133197	0.118772	0.162047	0.161677	0.129841	0.140129	-0.0718817	-0.0755176	-0.0933912	-0.0847298	-0.100119	-0.12572	-0.102525	0.0364103	-0.00610977	0.0281207
P22695	UQCRC2	Cytochrome b-c1 complex subunit 2, mitochondrial OS=Homo sapiens GN=UQCRC2 PE=1 SV=3	64.9007	25	308	25	2	0	453	48.4	4.12356e-11	0.329014	-0.134378	-0.100762	6.22064e-11	2.59397e-09	0.451239	-0.463391	-0.429776	0.0336158	1	1	0	0.312683	0.314307	0.362778	0.344348	0.303891	0.336075	-0.149011	-0.177794	-0.0446713	-0.110694	-0.162497	-0.189749	-0.106228	-0.0695755	-0.134689	-0.0980213
Q460N5	PARP14	Poly [ADP-ribose] polymerase 14 OS=Homo sapiens GN=PARP14 PE=1 SV=3	54.1366	85	191	85	0	0	1801	202.7	4.12865e-11	0.105969	-0.164313	0.131834	1.6098e-10	0.333122	6.75212e-10	-0.270282	0.0258646	0.296146	0	0	0	0.0890626	0.110676	0.074582	0.107557	0.112842	0.141095	-0.191949	-0.141324	-0.193005	-0.193178	-0.137276	-0.169562	-0.123895	0.137782	0.12965	0.128069
P31146	CORO1A	Coronin-1A OS=Homo sapiens GN=CORO1A PE=1 SV=4	44.4685	23	99	22	4	0	461	51	4.40772e-11	0.185967	-0.324673	0.278181	2.48743e-10	0.0461027	4.38992e-10	-0.510639	0.0922141	0.602853	1	0	1	0.139764	0.20355	0.169318	0.179117	0.184818	0.239233	-0.285892	-0.30428	-0.251492	-0.443772	-0.303248	-0.37421	-0.309814	0.291679	0.261719	0.281145
O43852-3	CALU	Isoform 3 of Calumenin OS=Homo sapiens GN=CALU	69.3498	26	387	6	0	28	323	38	4.41322e-11	-0.219432	0.166052	-0.118416	4.80225e-11	0.00170914	2.49594e-08	0.385484	0.101016	-0.284468	0	0	0	-0.251322	-0.186294	-0.250806	-0.20443	-0.222667	-0.201074	0.132243	0.149716	0.119812	0.23673	0.174596	0.184772	0.164494	-0.10772	-0.108197	-0.139331
P28062	PSMB8	Proteasome subunit beta type-8 OS=Homo sapiens GN=PSMB8 PE=1 SV=3	38.7681	6	14	6	0	0	276	30.3	4.4696e-11	1.13352	-0.811751	-0.682185	6.8647e-11	2.6439e-09	0.513099	-1.94527	-1.8157	0.129567	1	1	0	1.1125	1.10213	1.2299	1.18853	1.0476	1.12045	-0.929395	-0.984885	-0.540929	-0.518505	-0.770945	-1.13054	-0.807065	-0.601955	-0.825126	-0.619473
P41221	WNT5A	Protein Wnt-5a OS=Homo sapiens GN=WNT5A PE=1 SV=2	31.8421	13	24	10	0	3	380	42.3	4.85125e-11	-0.270854	-0.210883	0.446654	0.105422	7.64873e-11	1.62964e-10	0.0599709	0.717508	0.657537	0	1	1	-0.278898	-0.26488	-0.332606	-0.239152	-0.269099	-0.240487	-0.314679	-0.244573	-0.184228	-0.137818	-0.200624	-0.211313	-0.182946	0.454532	0.497264	0.388165
Q6ZN17	LIN28B	Protein lin-28 homolog B OS=Homo sapiens GN=LIN28B PE=1 SV=1	68.8	17	106	15	5	3	250	27.1	5.20597e-11	-0.324267	0.281013	-0.386214	2.05213e-10	0.302234	8.01507e-10	0.60528	-0.0619476	-0.667227	1	0	1	-0.355305	-0.333434	-0.333677	-0.30213	-0.298956	-0.322098	0.385557	0.392773	0.259268	0.287116	0.206876	0.229512	0.20599	-0.360642	-0.38009	-0.417911
Q96RY7	IFT140	Intraflagellar transport protein 140 homolog OS=Homo sapiens GN=IFT140 PE=1 SV=1	16.7579	18	34	18	10	0	1462	165.1	5.24506e-11	0.190041	-0.147221	0.0868583	5.15259e-11	0.000479229	5.6067e-08	-0.337261	-0.103182	0.234079	0	0	0	0.172265	0.189343	0.207923	0.177485	0.194429	0.198801	-0.130932	-0.154836	-0.146963	-0.111529	-0.153502	-0.213098	-0.119686	0.11424	0.100953	0.0453814
Q9NWZ3	IRAK4	Interleukin-1 receptor-associated kinase 4 OS=Homo sapiens GN=IRAK4 PE=1 SV=1	40.6522	16	29	16	0	0	460	51.5	5.55944e-11	0.158477	-0.156754	0.0855072	6.52837e-11	0.0053026	2.05229e-08	-0.315231	-0.0729699	0.242261	0	0	0	0.135268	0.141325	0.168188	0.17751	0.163225	0.165346	-0.175872	-0.141322	-0.131027	-0.136447	-0.116802	-0.218786	-0.177021	0.102777	0.076244	0.0775012
O00418	EEF2K	Eukaryotic elongation factor 2 kinase OS=Homo sapiens GN=EEF2K PE=1 SV=2	39.3103	28	99	28	13	0	725	82.1	5.6186e-11	0.188056	-0.172273	0.0781215	5.5257e-11	0.0005163	5.90775e-08	-0.360329	-0.109934	0.250394	0	0	0	0.19537	0.212732	0.196051	0.137188	0.180759	0.206236	-0.146092	-0.15236	-0.154806	-0.235498	-0.179967	-0.15518	-0.182005	0.0774568	0.0441568	0.112751
Q92696	RABGGTA	Geranylgeranyl transferase type-2 subunit alpha OS=Homo sapiens GN=RABGGTA PE=1 SV=2	52.381	25	111	25	0	0	567	65	5.65902e-11	0.0972637	-0.118609	0.107331	1.75344e-10	0.759357	1.26172e-09	-0.215873	0.0100669	0.22594	0	0	0	0.0734655	0.0986768	0.0958616	0.0856878	0.108499	0.121391	-0.0985511	-0.0804485	-0.123044	-0.124227	-0.109176	-0.143232	-0.151586	0.113373	0.104201	0.104418
Q8WZ74	CTTNBP2	Cortactin-binding protein 2 OS=Homo sapiens GN=CTTNBP2 PE=1 SV=1	22.3091	31	60	31	0	0	1663	180.9	5.739e-11	0.163644	-0.274889	0.225003	2.64073e-10	0.135046	6.98881e-10	-0.438533	0.0613594	0.499892	1	0	1	0.193199	0.130744	0.117106	0.167338	0.151921	0.221553	-0.294185	-0.239469	-0.220794	-0.220033	-0.284284	-0.333751	-0.331708	0.226859	0.203165	0.244985
Q9NTJ3	SMC4	Structural maintenance of chromosomes protein 4 OS=Homo sapiens GN=SMC4 PE=1 SV=2	64.3634	89	787	89	0	0	1288	147.1	5.82662e-11	0.0959795	-0.109915	0.0769567	1.05646e-10	0.332978	4.27159e-09	-0.205895	-0.0190228	0.186872	0	0	0	0.0879801	0.106356	0.0781382	0.100775	0.111375	0.0912516	-0.0851064	-0.0865764	-0.105093	-0.150861	-0.107246	-0.103469	-0.131055	0.0663967	0.0849942	0.0794793
P28065	PSMB9	Proteasome subunit beta type-9 OS=Homo sapiens GN=PSMB9 PE=1 SV=2	30.137	6	10	6	1	0	219	23.3	5.89278e-11	0.410496	-0.394011	0.1833	6.08904e-11	0.00107833	4.40776e-08	-0.804508	-0.227196	0.577311	1	0	1	0.386731	0.389489	0.400257	0.451246	0.362741	0.472515	-0.463195	-0.409532	-0.289517	-0.286356	-0.414344	-0.496371	-0.398763	0.250035	0.094578	0.205288
Q14938-3	NFIX	Isoform 3 of Nuclear factor 1 X-type OS=Homo sapiens GN=NFIX	31.746	10	34	8	0	1	441	48.8	6.71557e-11	0.349096	-0.447659	0.198865	8.85636e-11	0.0231759	1.4276e-08	-0.796755	-0.15023	0.646524	1	0	1	0.306986	0.345017	0.265955	0.36305	0.343771	0.469794	-0.531902	-0.421582	-0.336732	-0.361917	-0.452391	-0.533689	-0.4954	0.235743	0.176695	0.184158
Q96CX2	KCTD12	BTB/POZ domain-containing protein KCTD12 OS=Homo sapiens GN=KCTD12 PE=1 SV=1	58.1538	14	33	14	14	0	325	35.7	6.73266e-11	0.627477	-0.390221	-0.107607	6.01225e-11	5.39807e-08	0.00100274	-1.0177	-0.735083	0.282614	1	1	0	0.657881	0.550147	0.658285	0.635102	0.636576	0.626867	-0.472614	-0.561963	-0.372451	-0.185798	-0.3348	-0.441051	-0.362866	-0.0816885	-0.154278	-0.0868539
P08670	VIM	Vimentin OS=Homo sapiens GN=VIM PE=1 SV=4	90.9871	64	2055	53	4	16	466	53.6	7.69263e-11	-0.523659	0.360027	-0.46394	1.50024e-10	0.560418	4.40084e-09	0.883686	0.0597188	-0.823967	1	0	1	-0.498364	-0.562141	-0.5461	-0.501548	-0.475119	-0.558681	0.270637	0.232973	0.260111	0.360255	0.385411	0.494275	0.516527	-0.473423	-0.4522	-0.466197
Q9Y6N5	SQRDL	Sulfide:quinone oxidoreductase, mitochondrial OS=Homo sapiens GN=SQRDL PE=1 SV=1	45.1111	16	37	16	0	0	450	49.9	7.8215e-11	0.357277	-0.339132	0.114319	7.03491e-11	0.00017955	1.61358e-07	-0.69641	-0.242958	0.453452	1	0	1	0.376112	0.316204	0.380131	0.37883	0.34013	0.352256	-0.419194	-0.443492	-0.378385	-0.285902	-0.267554	-0.352988	-0.226411	0.158588	0.0834249	0.100945
Q92888-3	ARHGEF1	Isoform 3 of Rho guanine nucleotide exchange factor 1 OS=Homo sapiens GN=ARHGEF1	50.8091	44	253	44	0	0	927	104	8.25471e-11	0.111455	-0.117135	0.0839088	1.33478e-10	0.180826	8.03936e-09	-0.22859	-0.0275464	0.201043	0	0	0	0.09902	0.103607	0.0844773	0.12438	0.128492	0.128755	-0.126362	-0.0927636	-0.14164	-0.0802731	-0.136945	-0.13882	-0.103139	0.0781739	0.0805486	0.0930038
B1AHC3	PRR5-ARHGAP8	Protein PRR5-ARHGAP8 OS=Homo sapiens GN=PRR5-ARHGAP8 PE=1 SV=1	42.9078	19	67	19	0	0	564	64.5	8.40721e-11	0.111464	-0.125013	0.166489	5.67623e-10	0.0171644	6.09835e-10	-0.236477	0.0550241	0.291501	0	0	0	0.100414	0.102274	0.0680956	0.119413	0.147415	0.131176	-0.116741	-0.100349	-0.118268	-0.148384	-0.09384	-0.15309	-0.144415	0.179076	0.167786	0.152603
Q15124	PGM5	Phosphoglucomutase-like protein 5 OS=Homo sapiens GN=PGM5 PE=1 SV=2	7.23104	3	5	3	1	0	567	62.2	8.64788e-11	0.605187	-0.180295	-0.316851	3.18802e-10	7.98532e-10	0.0545156	-0.785482	-0.922039	-0.136557	1	1	0	0.677394	0.592964	0.58014	0.610562	0.559476	0.610588	-0.273881	-0.247016	-0.128478	-0.0462006	-0.185566	-0.2847	-0.0962212	-0.222214	-0.33026	-0.398079
Q9NY61	AATF	Protein AATF OS=Homo sapiens GN=AATF PE=1 SV=1	47.5	19	144	19	12	0	560	63.1	8.79493e-11	-0.138316	0.0911817	-0.0998729	1.2206e-10	0.0494404	1.44445e-08	0.229498	0.0384435	-0.191055	0	0	0	-0.159649	-0.129998	-0.162399	-0.140611	-0.113984	-0.123258	0.104232	0.103038	0.0924984	0.10721	0.0516115	0.0731064	0.106576	-0.0996545	-0.0792682	-0.120696
Q9NP80	PNPLA8	Calcium-independent phospholipase A2-gamma OS=Homo sapiens GN=PNPLA8 PE=1 SV=1	31.5857	21	77	20	0	1	782	88.4	8.92709e-11	-0.0364131	-0.142771	0.218801	9.6408e-06	5.77138e-09	6.7882e-11	-0.106358	0.255214	0.361572	0	0	0	-0.0621764	-0.0215776	-0.0124374	-0.0258209	-0.0770942	-0.0193723	-0.0872331	-0.144692	-0.146431	-0.159295	-0.137348	-0.159921	-0.164476	0.233285	0.215886	0.207233
Q58WW2-3	DCAF6	Isoform 3 of DDB1- and CUL4-associated factor 6 OS=Homo sapiens GN=DCAF6	34.5952	25	55	25	0	0	951	106.5	1.03293e-10	0.184793	-0.171035	0.0426924	8.55328e-11	5.5791e-05	4.99103e-07	-0.355828	-0.1421	0.213728	0	0	0	0.138309	0.205482	0.184478	0.183762	0.206191	0.190534	-0.144049	-0.129746	-0.138151	-0.179136	-0.184471	-0.217588	-0.204105	0.0758309	0.00762305	0.0446232
Q9HCD6-2	TANC2	Isoform 2 of Protein TANC2 OS=Homo sapiens GN=TANC2	23.75	39	111	37	0	2	2000	220.6	1.03449e-10	0.173312	-0.352861	0.37535	1.43926e-09	0.000773912	3.99427e-10	-0.526173	0.202038	0.728211	1	0	1	0.173361	0.168504	0.200592	0.142373	0.162435	0.192606	-0.327171	-0.273258	-0.258885	-0.306979	-0.386572	-0.46141	-0.455754	0.360065	0.384613	0.381372
P24386	CHM	Rab proteins geranylgeranyltransferase component A 1 OS=Homo sapiens GN=CHM PE=1 SV=3	52.5268	28	119	24	22	4	653	73.4	1.06188e-10	0.130741	-0.108941	0.0734723	1.19581e-10	0.00602092	4.22035e-08	-0.239682	-0.0572689	0.182413	0	0	0	0.117237	0.122903	0.159074	0.113671	0.127414	0.144148	-0.11608	-0.105356	-0.130725	-0.0508811	-0.111822	-0.126241	-0.121482	0.0707686	0.0698819	0.0797663
P06400	RB1	Retinoblastoma-associated protein OS=Homo sapiens GN=RB1 PE=1 SV=2	44.7198	40	231	40	40	0	928	106.1	1.07467e-10	0.220306	-0.252797	0.128715	1.36617e-10	0.024469	2.39526e-08	-0.473103	-0.0915911	0.381512	1	0	1	0.236147	0.24805	0.224845	0.266714	0.122271	0.223809	-0.261363	-0.287105	-0.209486	-0.31988	-0.229773	-0.207037	-0.254934	0.127722	0.110744	0.147679
Q99689	FEZ1	Fasciculation and elongation protein zeta-1 OS=Homo sapiens GN=FEZ1 PE=1 SV=1	14.7959	6	14	6	4	0	392	45.1	1.07484e-10	-0.191891	-0.0986792	0.328573	0.00129748	1.07454e-10	8.04319e-10	0.0932118	0.520464	0.427252	0	1	1	-0.238192	-0.17953	-0.247344	-0.157159	-0.136264	-0.192857	-0.0819825	-0.041721	-0.140982	-0.0949096	-0.0972124	-0.10508	-0.128867	0.321572	0.355206	0.30894
Q96A35	MRPL24	39S ribosomal protein L24, mitochondrial OS=Homo sapiens GN=MRPL24 PE=1 SV=1	70.8333	14	60	14	5	0	216	24.9	1.10063e-10	0.225823	-0.108948	-0.0598297	1.28697e-10	1.52033e-08	0.0816468	-0.334771	-0.285653	0.049118	0	1	0	0.227037	0.260582	0.206266	0.219622	0.245232	0.196198	-0.158367	-0.1115	-0.109812	-0.07794	-0.115874	-0.139277	-0.0498636	-0.045464	-0.0481443	-0.0858806
Q96EP1	CHFR	E3 ubiquitin-protein ligase CHFR OS=Homo sapiens GN=CHFR PE=1 SV=2	13.7048	6	8	6	0	0	664	73.3	1.10507e-10	-0.607426	0.207725	-0.00772858	9.96667e-11	7.0888e-08	0.00210509	0.815151	0.599697	-0.215454	1	1	0	-0.609438	-0.58717	-0.53785	-0.602166	-0.645964	-0.661968	0.13208	0.229578	0.160154	0.228277	0.247484	0.0817618	0.374744	0.000944894	0.0255505	-0.0496812
P50995	ANXA11	Annexin A11 OS=Homo sapiens GN=ANXA11 PE=1 SV=1	46.5347	26	170	26	0	0	505	54.4	1.14435e-10	0.16183	-0.186363	0.140074	2.20738e-10	0.626472	6.19434e-09	-0.348193	-0.0217562	0.326437	0	0	0	0.115022	0.196479	0.183839	0.174611	0.13052	0.170512	-0.186812	-0.197972	-0.126779	-0.239037	-0.171006	-0.166681	-0.216254	0.132363	0.123871	0.163989
Q5R372	RABGAP1L	Rab GTPase-activating protein 1-like OS=Homo sapiens GN=RABGAP1L PE=1 SV=1	28.3436	19	53	16	0	3	815	92.5	1.18283e-10	0.171762	-0.16597	0.0223172	9.31044e-11	2.08552e-05	1.27133e-06	-0.337732	-0.149445	0.188287	0	0	0	0.168598	0.168855	0.173498	0.19097	0.165547	0.163103	-0.142286	-0.110333	-0.187254	-0.154185	-0.137952	-0.200971	-0.22881	0.0248685	0.00319417	0.0388889
Q12929	EPS8	Epidermal growth factor receptor kinase substrate 8 OS=Homo sapiens GN=EPS8 PE=1 SV=1	26.0341	17	39	17	0	0	822	91.8	1.19692e-10	0.194166	-0.194752	0.0638362	1.0876e-10	0.000364196	1.92018e-07	-0.388917	-0.130329	0.258588	0	0	0	0.185085	0.150512	0.196823	0.19508	0.235701	0.201793	-0.194857	-0.173275	-0.179973	-0.120939	-0.237498	-0.239986	-0.216736	0.0517411	0.0919084	0.0478591
Q8IVW6	ARID3B	AT-rich interactive domain-containing protein 3B OS=Homo sapiens GN=ARID3B PE=1 SV=2	68.4492	36	240	34	0	2	561	60.6	1.23297e-10	-0.540087	0.356739	-0.39603	1.71107e-10	0.0682665	1.85314e-08	0.896826	0.144057	-0.752769	1	0	1	-0.525513	-0.576953	-0.603044	-0.512752	-0.476369	-0.545891	0.298154	0.261333	0.190656	0.380774	0.393089	0.483105	0.490059	-0.406893	-0.35615	-0.425048
Q13232	NME3	Nucleoside diphosphate kinase 3 OS=Homo sapiens GN=NME3 PE=1 SV=2	67.4556	10	50	9	3	1	169	19	1.28304e-10	-0.344224	0.106891	0.133599	2.88717e-10	2.46931e-09	0.655473	0.451115	0.477824	0.0267081	1	1	0	-0.364567	-0.337499	-0.373921	-0.351456	-0.332773	-0.305131	0.0945315	0.162462	0.116638	0.189707	0.0671597	0.0320875	0.0856528	0.181764	0.0993979	0.119636
P18583-5	SON	Isoform D of Protein SON OS=Homo sapiens GN=SON	38.2269	75	707	16	0	90	2459	266.9	1.31011e-10	-0.144402	0.0761416	-0.0266406	9.85131e-11	2.86567e-06	9.74404e-06	0.220543	0.117761	-0.102782	0	0	0	-0.140504	-0.121784	-0.183706	-0.138008	-0.130733	-0.151675	0.0583754	0.0626958	0.0560605	0.073905	0.0823732	0.112892	0.0866896	-0.0315221	-0.0172931	-0.0311064
P00846	MT-ATP6	ATP synthase subunit a OS=Homo sapiens GN=MT-ATP6 PE=1 SV=1	4.42478	1	19	1	1	0	226	24.8	1.33119e-10	0.430346	-0.236721	-0.072912	1.23162e-10	6.47492e-08	0.00422295	-0.667067	-0.503258	0.163809	1	1	0	0.43938	0.431269	0.432284	0.444258	0.461204	0.37368	-0.295946	-0.282444	-0.233066	-0.0771067	-0.201194	-0.313738	-0.253554	-0.094477	-0.025327	-0.0989321
P35916	FLT4	Vascular endothelial growth factor receptor 3 OS=Homo sapiens GN=FLT4 PE=1 SV=3	7.33676	8	17	7	0	0	1363	152.7	1.43094e-10	0.418181	-0.451061	0.190116	1.4966e-10	0.00349641	7.70356e-08	-0.869243	-0.228065	0.641178	1	0	1	0.401152	0.456762	0.429016	0.424874	0.384147	0.413135	-0.537707	-0.501445	-0.387646	-0.290076	-0.438791	-0.626691	-0.375074	0.22237	0.174867	0.173112
Q02338	BDH1	D-beta-hydroxybutyrate dehydrogenase, mitochondrial OS=Homo sapiens GN=BDH1 PE=1 SV=3	57.7259	18	89	18	0	0	343	38.1	1.48017e-10	0.198897	-0.162324	0.125607	1.79571e-10	0.0213785	3.65463e-08	-0.361221	-0.0732891	0.287932	0	0	0	0.18757	0.221403	0.183016	0.205844	0.182841	0.212706	-0.209108	-0.182827	-0.183561	-0.0784474	-0.134262	-0.201953	-0.146113	0.135885	0.109326	0.131611
Q9UBB4	ATXN10	Ataxin-10 OS=Homo sapiens GN=ATXN10 PE=1 SV=1	81.0526	31	448	31	4	0	475	53.5	1.48968e-10	0.148158	-0.0861577	-0.00303755	1.17286e-10	3.90343e-07	0.000181089	-0.234316	-0.151195	0.0831202	0	0	0	0.133857	0.160585	0.126434	0.170584	0.158366	0.139122	-0.12638	-0.104811	-0.0919012	-0.0730764	-0.0497217	-0.0651523	-0.0920614	-0.010587	-0.00639121	0.00786553
Q9UKA9-2	PTBP2	Isoform 2 of Polypyrimidine tract-binding protein 2 OS=Homo sapiens GN=PTBP2	69.3609	22	225	1	0	35	532	57.6	1.55709e-10	0.0622138	-0.242422	0.285851	1.38069e-08	8.0979e-06	2.46654e-10	-0.304635	0.223638	0.528273	0	0	1	0.0182925	0.0595517	0.072312	0.0805562	0.0621015	0.0804689	-0.244427	-0.221985	-0.138705	-0.272095	-0.228233	-0.308516	-0.28299	0.300245	0.276929	0.28038
Q9NQR4	NIT2	Omega-amidase NIT2 OS=Homo sapiens GN=NIT2 PE=1 SV=1	81.8841	18	165	18	7	0	276	30.6	1.56665e-10	0.171919	-0.165858	0.0916073	1.72827e-10	0.0077254	6.02173e-08	-0.337777	-0.0803117	0.257465	0	0	0	0.131129	0.19387	0.174575	0.180648	0.166537	0.184755	-0.112591	-0.139586	-0.139005	-0.160784	-0.180511	-0.214117	-0.214412	0.109346	0.0664307	0.0990453
Q8NHV4-3	NEDD1	Isoform 3 of Protein NEDD1 OS=Homo sapiens GN=NEDD1	56.5217	27	123	27	0	0	667	72.7	1.61023e-10	0.160809	-0.180262	0.107961	2.22826e-10	0.087375	2.25104e-08	-0.341071	-0.0528483	0.288223	0	0	0	0.149431	0.166198	0.13656	0.19397	0.170832	0.147865	-0.135243	-0.123517	-0.149369	-0.220434	-0.201743	-0.226441	-0.205086	0.117028	0.112347	0.0945091
Q8TE77	SSH3	Protein phosphatase Slingshot homolog 3 OS=Homo sapiens GN=SSH3 PE=1 SV=2	42.7921	18	71	18	0	0	659	73	1.67438e-10	0.123443	-0.199341	0.232035	1.79198e-09	0.0026536	7.38015e-10	-0.322785	0.108592	0.431376	0	0	1	0.0841481	0.131512	0.13413	0.124897	0.104449	0.161525	-0.210241	-0.234199	-0.212358	-0.124587	-0.195611	-0.176932	-0.241462	0.283172	0.219393	0.193539
Q13228-4	SELENBP1	Isoform 4 of Selenium-binding protein 1 OS=Homo sapiens GN=SELENBP1	36.5759	13	22	13	0	0	514	56.8	1.70618e-10	-1.25516	0.633154	-1.04994	2.71881e-10	0.278974	1.44626e-08	1.88831	0.205213	-1.6831	1	0	1	-1.18145	-1.4944	-1.60458	-1.03869	-0.990795	-1.22103	0.753776	0.745072	0.452687	0.612796	0.610953	0.639341	0.617455	-1.08797	-0.857539	-1.20432
A6NDB9	PALM3	Paralemmin-3 OS=Homo sapiens GN=PALM3 PE=1 SV=2	55.4235	26	123	26	17	0	673	71.7	1.92888e-10	-0.216021	0.133937	-0.136076	2.14527e-10	0.0113817	6.49922e-08	0.349958	0.0799446	-0.270013	0	0	0	-0.238713	-0.211491	-0.222943	-0.170723	-0.20383	-0.248424	0.191589	0.14852	0.101492	0.114957	0.0851361	0.117971	0.177893	-0.143195	-0.11505	-0.149984
Q9BUP0	EFHD1	EF-hand domain-containing protein D1 OS=Homo sapiens GN=EFHD1 PE=1 SV=1	45.1883	11	55	9	1	0	239	26.9	1.97025e-10	-0.350336	0.168985	-0.129916	1.53817e-10	4.9391e-05	1.42487e-06	0.519322	0.22042	-0.298901	1	0	0	-0.376523	-0.384118	-0.404384	-0.323715	-0.291364	-0.321913	0.184676	0.181623	0.0569995	0.221721	0.145891	0.194147	0.19784	-0.12944	-0.100702	-0.159606
P13196	ALAS1	5-aminolevulinate synthase, nonspecific, mitochondrial OS=Homo sapiens GN=ALAS1 PE=1 SV=2	53.2812	28	78	28	17	0	640	70.5	1.98723e-10	-0.39452	0.247155	-0.315444	2.98205e-10	0.206838	1.9534e-08	0.641675	0.0790766	-0.562598	1	0	1	-0.435591	-0.413283	-0.457555	-0.384865	-0.338188	-0.337641	0.233887	0.202999	0.144751	0.177297	0.293864	0.34812	0.329164	-0.301018	-0.30614	-0.339174
Q8WUX2	CHAC2	Putative glutathione-specific gamma-glutamylcyclotransferase 2 OS=Homo sapiens GN=CHAC2 PE=2 SV=1	45.6522	8	46	8	8	0	184	20.9	2.00553e-10	0.241239	-0.198495	0.0910524	1.74949e-10	0.000440556	3.43866e-07	-0.439733	-0.150186	0.289547	1	0	0	0.216773	0.227768	0.224193	0.204836	0.287377	0.286486	-0.195517	-0.158779	-0.199391	-0.126665	-0.192285	-0.269291	-0.247534	0.0789479	0.0828084	0.111401
P11021	HSPA5	78 kDa glucose-regulated protein OS=Homo sapiens GN=HSPA5 PE=1 SV=2	66.9725	56	2235	53	52	6	654	72.3	2.07606e-10	-0.148783	0.118174	-0.108891	2.86078e-10	0.109415	2.70664e-08	0.266956	0.0398914	-0.227065	0	0	0	-0.11653	-0.171881	-0.15671	-0.143789	-0.143744	-0.160043	0.0923479	0.0682353	0.108208	0.139206	0.114997	0.134749	0.169471	-0.105242	-0.102548	-0.118884
P18031	PTPN1	Tyrosine-protein phosphatase non-receptor type 1 OS=Homo sapiens GN=PTPN1 PE=1 SV=1	68.046	32	195	32	6	0	435	49.9	2.1702e-10	-0.174001	0.140202	-0.139335	3.3694e-10	0.281254	1.86028e-08	0.314203	0.0346661	-0.279537	0	0	0	-0.191147	-0.170197	-0.191276	-0.16339	-0.148134	-0.179864	0.118269	0.1172	0.119007	0.114984	0.155001	0.150543	0.206409	-0.14861	-0.0906488	-0.178747
Q6IA86-6	ELP2	Isoform 6 of Elongator complex protein 2 OS=Homo sapiens GN=ELP2	49.7194	33	185	33	0	0	891	99.9	2.21117e-10	0.0757794	-0.044594	0.0198394	1.65734e-10	2.06919e-05	3.45218e-06	-0.120373	-0.05594	0.0644334	0	0	0	0.0731151	0.0731816	0.0665245	0.0722967	0.0936656	0.0758928	-0.0259263	-0.0370039	-0.0406336	-0.0454005	-0.055409	-0.0561995	-0.0515855	0.0262518	0.00297909	0.0302872
O43678	NDUFA2	NADH dehydrogenase [ubiquinone] 1 alpha subcomplex subunit 2 OS=Homo sapiens GN=NDUFA2 PE=1 SV=3	63.6364	9	60	9	3	0	99	10.9	2.21496e-10	0.151102	-0.146381	0.0158674	1.67172e-10	2.62466e-05	2.82571e-06	-0.297483	-0.135235	0.162249	0	0	0	0.116212	0.155649	0.163625	0.159638	0.156113	0.155375	-0.165388	-0.175537	-0.0947261	-0.145241	-0.140674	-0.196827	-0.106276	0.00700049	0.0237549	0.0168468
Q9BRT3	MIEN1	Migration and invasion enhancer 1 OS=Homo sapiens GN=MIEN1 PE=1 SV=1	53.0435	7	46	7	4	0	115	12.4	2.32757e-10	0.157172	-0.154802	0.146583	4.68257e-10	0.882884	9.59728e-09	-0.311974	-0.0105898	0.301385	0	0	0	0.158719	0.179745	0.139186	0.173441	0.144537	0.147408	-0.119899	-0.104743	-0.18458	-0.141321	-0.147959	-0.204749	-0.180364	0.193793	0.116286	0.129669
P30622-1	CLIP1	Isoform 2 of CAP-Gly domain-containing linker protein 1 OS=Homo sapiens GN=CLIP1	61.3875	77	289	2	0	94	1427	160.9	2.47483e-10	0.115121	-0.112695	0.0432408	2.22701e-10	0.00105292	2.78536e-07	-0.227816	-0.0718804	0.155936	0	0	0	0.097161	0.121243	0.108859	0.114494	0.130969	0.118	-0.142157	-0.127829	-0.126808	-0.135955	-0.0697508	-0.107084	-0.0792793	0.0332067	0.0614449	0.0350707
Q3V6T2	CCDC88A	Girdin OS=Homo sapiens GN=CCDC88A PE=1 SV=2	50.3474	83	272	79	0	4	1871	215.9	2.52214e-10	0.100422	-0.119342	0.0551365	2.90905e-10	0.0248008	6.32768e-08	-0.219764	-0.0452854	0.174479	0	0	0	0.0915781	0.0876251	0.105098	0.130808	0.101248	0.0861745	-0.0990575	-0.0920633	-0.121935	-0.0991726	-0.112973	-0.159957	-0.150238	0.0675432	0.0488234	0.0490428
O75376	NCOR1	Nuclear receptor corepressor 1 OS=Homo sapiens GN=NCOR1 PE=1 SV=2	40.4098	80	248	59	0	23	2440	270	2.53482e-10	0.106154	-0.128438	0.0667429	3.24975e-10	0.0714549	4.0452e-08	-0.234592	-0.0394112	0.19518	0	0	0	0.0844187	0.0958636	0.110926	0.107498	0.104919	0.133298	-0.14019	-0.102096	-0.0932001	-0.176605	-0.108203	-0.147294	-0.131475	0.0798372	0.057705	0.0626864
O95425-4	SVIL	Isoform SV4 of Supervillin OS=Homo sapiens GN=SVIL	37.3052	62	155	62	0	0	2182	244.4	2.59172e-10	-0.418247	0.187847	-0.0418814	1.93309e-10	9.89337e-07	0.000144	0.606094	0.376366	-0.229728	1	1	0	-0.450294	-0.389052	-0.442774	-0.448761	-0.444741	-0.33386	0.207322	0.287876	0.195552	0.231345	0.113214	0.0861432	0.193474	-0.0124361	-0.040138	-0.0730701
Q9Y4L1	HYOU1	Hypoxia up-regulated protein 1 OS=Homo sapiens GN=HYOU1 PE=1 SV=1	66.1662	59	757	58	1	1	999	111.3	2.61959e-10	-0.15142	0.0861257	-0.0543415	2.0396e-10	9.17312e-05	1.37826e-06	0.237546	0.0970788	-0.140467	0	0	0	-0.170122	-0.138366	-0.182742	-0.144501	-0.127161	-0.14563	0.0857804	0.077036	0.0508863	0.132547	0.0674435	0.0890405	0.100146	-0.0634544	-0.0433521	-0.056218
P14927	UQCRB	Cytochrome b-c1 complex subunit 7 OS=Homo sapiens GN=UQCRB PE=1 SV=2	70.2703	11	81	11	2	0	111	13.5	2.64265e-10	0.400893	-0.236702	-0.15659	3.06459e-10	2.80029e-08	0.183606	-0.637595	-0.557483	0.0801119	1	1	0	0.391019	0.430044	0.397553	0.427615	0.397599	0.361526	-0.247546	-0.252023	-0.0699471	-0.244055	-0.208303	-0.312093	-0.322948	-0.208644	-0.122602	-0.138525
Q14790-9	CASP8	Isoform 9 of Caspase-8 OS=Homo sapiens GN=CASP8	45.1673	20	59	7	0	16	538	61.8	2.65723e-10	0.210411	-0.205193	0.0852536	2.4448e-10	0.00165475	2.39979e-07	-0.415604	-0.125157	0.290447	0	0	0	0.190005	0.173598	0.186732	0.206599	0.244299	0.261233	-0.275677	-0.185604	-0.245724	-0.211278	-0.126722	-0.201899	-0.189448	0.10683	0.0780747	0.0708558
Q15084-2	PDIA6	Isoform 2 of Protein disulfide-isomerase A6 OS=Homo sapiens GN=PDIA6	52.2358	21	397	21	0	0	492	53.9	2.71148e-10	-0.153689	0.0930663	-0.111213	3.41511e-10	0.0654681	4.52578e-08	0.246755	0.0424761	-0.204279	0	0	0	-0.167631	-0.145311	-0.170958	-0.132278	-0.151262	-0.154695	0.0866527	0.0525528	0.0750406	0.0832225	0.0986713	0.0970113	0.158313	-0.102605	-0.112558	-0.118476
P29558	RBMS1	RNA-binding motif, single-stranded-interacting protein 1 OS=Homo sapiens GN=RBMS1 PE=1 SV=3	30.5419	9	129	1	0	12	406	44.5	2.73828e-10	-0.215972	0.170808	-0.186958	4.69285e-10	0.556773	1.64354e-08	0.38678	0.0290141	-0.357766	0	0	1	-0.239681	-0.223222	-0.235854	-0.19972	-0.18215	-0.215203	0.239243	0.19877	0.148891	0.0873457	0.153188	0.217112	0.151105	-0.192342	-0.157548	-0.210984
Q15018	FAM175B	BRISC complex subunit Abro1 OS=Homo sapiens GN=FAM175B PE=1 SV=2	37.8313	15	67	15	15	0	415	46.9	2.80397e-10	0.0984678	-0.119634	0.0739015	4.22685e-10	0.280638	2.44388e-08	-0.218102	-0.0245662	0.193536	0	0	0	0.0966358	0.0896897	0.107847	0.133613	0.0876386	0.0753827	-0.107766	-0.114949	-0.107208	-0.0796644	-0.123858	-0.155039	-0.148956	0.0739935	0.0779832	0.0697279
Q12965	MYO1E	Unconventional myosin-Ie OS=Homo sapiens GN=MYO1E PE=1 SV=2	49.639	47	179	46	17	0	1108	127	2.81421e-10	0.188328	-0.168096	0.0942369	2.78866e-10	0.00495336	1.49159e-07	-0.356424	-0.0940909	0.262333	0	0	0	0.168412	0.18252	0.214849	0.190041	0.178071	0.196074	-0.20452	-0.188515	-0.20435	-0.0751392	-0.176426	-0.186157	-0.141564	0.120985	0.0865113	0.0752139
Q86YM7	HOMER1	Homer protein homolog 1 OS=Homo sapiens GN=HOMER1 PE=1 SV=2	62.9944	21	49	19	0	2	354	40.3	3.05664e-10	0.0884147	-0.0919057	0.0247666	2.53565e-10	0.000436618	6.10065e-07	-0.18032	-0.063648	0.116672	0	0	0	0.0506658	0.0968065	0.084087	0.104984	0.086865	0.10708	-0.0972915	-0.0807648	-0.108199	-0.0843611	-0.0784655	-0.110591	-0.083667	0.0395988	0.00523413	0.029467
Q9UPU7	TBC1D2B	TBC1 domain family member 2B OS=Homo sapiens GN=TBC1D2B PE=1 SV=2	41.1215	34	101	34	1	0	963	109.8	3.07209e-10	0.0761978	-0.120566	0.0494841	4.26951e-10	0.170646	3.40452e-08	-0.196764	-0.0267136	0.17005	0	0	0	0.0652207	0.0745485	0.0555495	0.0764933	0.108291	0.0770832	-0.0932843	-0.100762	-0.118319	-0.104522	-0.125968	-0.14166	-0.15945	0.0518126	0.0520179	0.0446218
P07814	EPRS	Bifunctional glutamate/proline--tRNA ligase OS=Homo sapiens GN=EPRS PE=1 SV=5	72.3545	101	1597	99	38	2	1512	170.5	3.11266e-10	0.18139	-0.0974435	-0.0314005	2.75916e-10	1.28311e-07	0.00882527	-0.278834	-0.212791	0.0660431	0	0	0	0.173875	0.19348	0.174155	0.180755	0.186609	0.179469	-0.0833619	-0.0777892	-0.0639942	-0.0562481	-0.108117	-0.128046	-0.164549	-0.030314	-0.0261928	-0.0376946
Q16822	PCK2	Phosphoenolpyruvate carboxykinase [GTP], mitochondrial OS=Homo sapiens GN=PCK2 PE=1 SV=3	70.7812	48	454	16	0	47	640	70.7	3.20376e-10	-0.0879874	0.117882	-0.155107	3.196e-09	0.00478331	1.41591e-09	0.205869	-0.0671193	-0.272988	0	0	0	-0.100523	-0.102877	-0.0908591	-0.0643827	-0.0784743	-0.0908084	0.0809644	0.117056	0.099566	0.147848	0.136945	0.0916673	0.151124	-0.138172	-0.136615	-0.190534
P05186	ALPL	Alkaline phosphatase, tissue-nonspecific isozyme OS=Homo sapiens GN=ALPL PE=1 SV=4	47.5191	21	156	21	5	0	524	57.3	3.20972e-10	-0.641949	0.205264	0.0568241	3.23271e-10	5.99119e-08	0.0528622	0.847214	0.698773	-0.14844	1	1	0	-0.712178	-0.614154	-0.688059	-0.618695	-0.622423	-0.596186	0.135204	0.138132	0.0873996	0.122864	0.254677	0.312153	0.38642	0.0453421	0.0784758	0.0466545
O95169	NDUFB8	NADH dehydrogenase [ubiquinone] 1 beta subcomplex subunit 8, mitochondrial OS=Homo sapiens GN=NDUFB8 PE=1 SV=1	40.3226	7	28	7	0	0	186	21.8	3.30479e-10	0.193287	-0.193241	0.0556569	2.71115e-10	0.000425222	6.89296e-07	-0.386528	-0.13763	0.248897	0	0	0	0.16921	0.183083	0.219118	0.178891	0.151723	0.257699	-0.255369	-0.217479	-0.180038	-0.178253	-0.20318	-0.19711	-0.121255	0.0456695	0.0533602	0.0679409
H0UI06	COX7A2	Cytochrome c oxidase subunit 7A2, mitochondrial OS=Homo sapiens GN=COX7A2 PE=1 SV=1	20	2	24	2	0	0	115	12.8	3.3456e-10	0.325895	-0.226322	-0.0414414	2.5476e-10	5.89985e-07	0.000564957	-0.552217	-0.367337	0.184881	1	1	0	0.26897	0.353568	0.327834	0.31816	0.35082	0.33602	-0.271475	-0.254847	-0.24369	-0.0851969	-0.176111	-0.280832	-0.272103	-0.0593534	-0.0264127	-0.0385581
P29373	CRABP2	Cellular retinoic acid-binding protein 2 OS=Homo sapiens GN=CRABP2 PE=1 SV=2	54.3478	8	169	7	2	2	138	15.7	3.46546e-10	-0.811167	0.446432	-0.446646	3.1917e-10	0.00268934	2.60822e-07	1.2576	0.364521	-0.893078	1	1	1	-0.80547	-0.894883	-0.917611	-0.699088	-0.709615	-0.840336	0.463241	0.447794	0.171266	0.326779	0.632543	0.59661	0.486789	-0.479532	-0.404266	-0.456141
P49748-2	ACADVL	Isoform 2 of Very long-chain specific acyl-CoA dehydrogenase, mitochondrial OS=Homo sapiens GN=ACADVL	69.9842	36	258	36	1	0	633	68	3.47694e-10	0.0888512	-0.181764	0.181685	3.78249e-09	0.00363628	1.43105e-09	-0.270615	0.092834	0.363449	0	0	0	0.0678814	0.082359	0.0622542	0.11693	0.0926265	0.111056	-0.23667	-0.192119	-0.234347	-0.141667	-0.141382	-0.18814	-0.138021	0.179133	0.18851	0.177413
Q96GC5	MRPL48	39S ribosomal protein L48, mitochondrial OS=Homo sapiens GN=MRPL48 PE=1 SV=2	29.717	6	40	6	0	0	212	23.9	3.4878e-10	0.142602	-0.0828073	-0.0670461	4.63527e-10	2.04493e-08	0.584208	-0.225409	-0.209648	0.0157612	0	0	0	0.125322	0.191494	0.128297	0.128422	0.149221	0.132855	-0.0793715	-0.086763	-0.0835712	-0.0647843	-0.0900954	-0.125757	-0.0493088	-0.0654822	-0.0629512	-0.0727048
P48426	PIP4K2A	Phosphatidylinositol 5-phosphate 4-kinase type-2 alpha OS=Homo sapiens GN=PIP4K2A PE=1 SV=2	29.064	11	75	6	0	0	406	46.2	3.67474e-10	0.107408	-0.121169	0.0560072	3.91021e-10	0.0173481	1.14446e-07	-0.228578	-0.0514009	0.177177	0	0	0	0.095334	0.106345	0.121102	0.135384	0.0792606	0.107023	-0.125417	-0.154224	-0.125408	-0.111369	-0.115329	-0.110412	-0.106027	0.0689275	0.0115821	0.087512
B8ZZS0	BET1L	BET1-like protein OS=Homo sapiens GN=BET1L PE=1 SV=1	10.5263	1	5	1	0	0	152	17.1	3.68296e-10	-0.311688	0.193973	-0.134036	3.01698e-10	0.000521067	7.04874e-07	0.505661	0.177651	-0.328009	1	0	0	-0.336893	-0.293095	-0.38718	-0.263572	-0.263333	-0.326051	0.132778	0.139159	0.232811	0.253155	0.140786	0.247311	0.211812	-0.126321	-0.108655	-0.167133
O14548	COX7A2L	Cytochrome c oxidase subunit 7A-related protein, mitochondrial OS=Homo sapiens GN=COX7A2L PE=1 SV=2	54.386	4	21	4	1	0	114	12.6	3.95193e-10	0.357216	-0.218007	-0.0792104	3.40619e-10	1.70676e-07	0.00881057	-0.575223	-0.436427	0.138797	1	1	0	0.329899	0.373159	0.355398	0.348205	0.380123	0.356514	-0.204032	-0.273472	-0.277339	-0.0612698	-0.284499	-0.196371	-0.229068	-0.0338254	-0.0985726	-0.105233
Q92543	SNX19	Sorting nexin-19 OS=Homo sapiens GN=SNX19 PE=1 SV=2	3.125	2	3	2	0	0	992	108.5	4.02261e-10	-0.18151	0.366462	-0.0302954	3.76787e-10	0.00434076	2.46147e-07	0.547972	0.151214	-0.396758	1	0	1	-0.120714	-0.223877	-0.182888	-0.229648	-0.235317	-0.0966143	0.310311	0.374051	0.355314	0.42612	0.344904	0.320325	0.43421	-0.0369595	-0.0812564	0.0273296
P09493	TPM1	Tropomyosin alpha-1 chain OS=Homo sapiens GN=TPM1 PE=1 SV=2	70.0704	32	451	0	0	2	284	32.7	4.10731e-10	-0.463764	0.260425	-0.218828	3.40644e-10	0.000797326	6.32277e-07	0.724189	0.244936	-0.479253	1	0	1	-0.498665	-0.526807	-0.560241	-0.400405	-0.366891	-0.429572	0.281984	0.12736	0.228403	0.305579	0.242561	0.352227	0.284864	-0.279182	-0.191833	-0.185468
P54687	BCAT1	Branched-chain-amino-acid aminotransferase, cytosolic OS=Homo sapiens GN=BCAT1 PE=1 SV=3	49.7409	19	358	19	0	0	386	42.9	4.15609e-10	-0.169753	0.15612	-0.178468	1.01358e-09	0.934233	1.02597e-08	0.325874	-0.00871521	-0.334589	0	0	0	-0.201235	-0.162086	-0.197415	-0.16664	-0.139385	-0.151757	0.197978	0.208053	0.110413	0.166045	0.16016	0.170781	0.0794133	-0.183779	-0.170754	-0.180872
O94900	TOX	Thymocyte selection-associated high mobility group box protein TOX OS=Homo sapiens GN=TOX PE=2 SV=3	11.7871	5	28	2	2	0	526	57.5	4.25798e-10	-0.64712	0.321208	-0.179513	3.0065e-10	2.36929e-05	8.83969e-06	0.968328	0.467608	-0.50072	1	1	1	-0.685177	-0.656823	-0.665475	-0.592108	-0.603493	-0.679646	0.392464	0.2201	0.125993	0.426448	0.320542	0.490401	0.272506	-0.14484	-0.263153	-0.130545
Q86UV5	USP48	Ubiquitin carboxyl-terminal hydrolase 48 OS=Homo sapiens GN=USP48 PE=1 SV=1	54.4928	44	191	25	0	24	1035	119	4.42345e-10	0.114284	-0.117461	0.0864927	6.27845e-10	0.262505	4.09451e-08	-0.231746	-0.0277916	0.203954	0	0	0	0.0794159	0.139201	0.0963618	0.134074	0.117573	0.119081	-0.100006	-0.0886085	-0.140276	-0.0832793	-0.126119	-0.123525	-0.160415	0.0819246	0.085662	0.0918916
Q9Y490	TLN1	Talin-1 OS=Homo sapiens GN=TLN1 PE=1 SV=3	79.3388	168	2094	147	147	30	2541	269.6	4.8952e-10	0.0920398	-0.113064	0.0827373	8.93645e-10	0.820555	2.20202e-08	-0.205104	-0.00930249	0.195802	0	0	0	0.0646008	0.109156	0.0863584	0.113467	0.0845175	0.0941388	-0.093073	-0.091513	-0.0929012	-0.164048	-0.105367	-0.107639	-0.13691	0.0848138	0.0772367	0.0861614
Q8NBS9	TXNDC5	Thioredoxin domain-containing protein 5 OS=Homo sapiens GN=TXNDC5 PE=1 SV=2	69.213	27	543	27	0	0	432	47.6	4.97813e-10	-0.230396	0.170398	-0.134947	4.99908e-10	0.0139215	1.80698e-07	0.400793	0.0954487	-0.305344	0	0	0	-0.266072	-0.209603	-0.249487	-0.215962	-0.20598	-0.23527	0.159022	0.140838	0.133922	0.289186	0.138663	0.171319	0.159832	-0.126495	-0.119717	-0.158628
P55263	ADK	Adenosine kinase OS=Homo sapiens GN=ADK PE=1 SV=2	70.442	21	152	21	0	0	362	40.5	5.15405e-10	0.235561	-0.181385	0.0895874	4.11422e-10	0.000681548	9.4015e-07	-0.416946	-0.145974	0.270972	0	0	0	0.195903	0.249962	0.221189	0.240207	0.237203	0.268904	-0.139417	-0.131808	-0.163837	-0.136507	-0.184886	-0.275079	-0.23816	0.0829097	0.0761004	0.109752
Q8IYM9	TRIM22	E3 ubiquitin-protein ligase TRIM22 OS=Homo sapiens GN=TRIM22 PE=1 SV=1	48.7952	20	81	20	0	0	498	56.9	5.2005e-10	0.141862	-0.159766	0.12944	9.60754e-10	0.850829	2.25061e-08	-0.301628	-0.0124218	0.289207	0	0	0	0.134646	0.115147	0.111922	0.160053	0.168035	0.161368	-0.15419	-0.104017	-0.139047	-0.120657	-0.196221	-0.200544	-0.203689	0.124164	0.146109	0.118047
A0A087X1Z3	PSME2	Proteasome activator complex subunit 2 OS=Homo sapiens GN=PSME2 PE=1 SV=1	62.9921	15	110	2	0	16	254	29.1	5.2207e-10	0.256586	-0.261014	0.247042	1.0512e-09	0.96828	1.85446e-08	-0.5176	-0.00954418	0.508056	1	0	1	0.23162	0.260569	0.26426	0.265467	0.244056	0.273544	-0.222394	-0.187448	-0.205972	-0.188053	-0.298396	-0.338793	-0.386043	0.248875	0.225628	0.266622
Q7Z401-2	DENND4A	Isoform 2 of C-myc promoter-binding protein OS=Homo sapiens GN=DENND4A	18.0483	27	54	26	0	0	1906	213.6	5.22618e-10	0.185	-0.146341	0.0956423	4.85748e-10	0.00600061	2.88191e-07	-0.331341	-0.0893574	0.241983	0	0	0	0.162664	0.14557	0.154197	0.217548	0.205386	0.224634	-0.139309	-0.158022	-0.105688	-0.179724	-0.148028	-0.194635	-0.0989794	0.117855	0.0941069	0.0749655
P08473	MME	Neprilysin OS=Homo sapiens GN=MME PE=1 SV=2	42.8	29	57	29	19	0	750	85.5	5.30061e-10	-0.186914	-0.311751	0.595392	0.0235407	3.70926e-09	4.72515e-10	-0.124837	0.782306	0.907142	0	1	1	-0.196674	-0.138282	-0.24425	-0.211077	-0.17811	-0.153092	-0.306989	-0.240013	-0.313914	-0.138965	-0.427961	-0.410871	-0.343542	0.596676	0.635959	0.55354
Q3KQU3	MAP7D1	MAP7 domain-containing protein 1 OS=Homo sapiens GN=MAP7D1 PE=1 SV=1	46.1356	35	183	2	0	40	841	92.8	5.44674e-10	-0.17238	0.0990592	-0.0545425	3.89777e-10	8.79686e-05	4.22774e-06	0.271439	0.117837	-0.153602	0	0	0	-0.182256	-0.162168	-0.201059	-0.166783	-0.140348	-0.181664	0.0634355	0.113755	0.104809	0.0434968	0.127239	0.102738	0.13794	-0.0523009	-0.0441015	-0.0672252
P32189	GK	Glycerol kinase OS=Homo sapiens GN=GK PE=1 SV=3	62.6118	27	105	27	0	0	559	61.2	5.67615e-10	0.119069	-0.145976	0.10698	1.02644e-09	0.822492	2.54958e-08	-0.265045	-0.0120892	0.252956	0	0	0	0.0701468	0.12402	0.134134	0.163699	0.116964	0.105454	-0.181743	-0.184917	-0.130206	-0.146704	-0.142669	-0.139037	-0.0965524	0.117499	0.104197	0.0992449
P50748	KNTC1	Kinetochore-associated protein 1 OS=Homo sapiens GN=KNTC1 PE=1 SV=1	41.1046	87	301	85	29	2	2209	250.6	5.67959e-10	0.139313	-0.129335	0.0659509	5.20532e-10	0.00573111	3.26391e-07	-0.268649	-0.0733622	0.195286	0	0	0	0.127871	0.128956	0.130388	0.150045	0.156146	0.142473	-0.115286	-0.108689	-0.124289	-0.0641664	-0.172333	-0.168015	-0.15257	0.06864	0.0726983	0.0565145
Q9NR30	DDX21	Nucleolar RNA helicase 2 OS=Homo sapiens GN=DDX21 PE=1 SV=5	69.9872	66	1083	63	6	4	783	87.3	6.43521e-10	-0.100082	0.104435	-0.105843	1.54709e-09	0.932113	1.56087e-08	0.204517	-0.00576123	-0.210278	0	0	0	-0.106107	-0.092018	-0.112626	-0.101116	-0.0798919	-0.10873	0.0728038	0.0725315	0.0988353	0.0806896	0.123954	0.132156	0.150076	-0.108001	-0.0965764	-0.112951
P28331-2	NDUFS1	Isoform 2 of NADH-ubiquinone oxidoreductase 75 kDa subunit, mitochondrial OS=Homo sapiens GN=NDUFS1	72.0648	41	463	41	0	0	741	80.9	6.5033e-10	0.18906	-0.131777	0.0339402	4.43458e-10	3.32301e-05	1.2863e-05	-0.320837	-0.15512	0.165717	0	0	0	0.172965	0.211309	0.193033	0.173346	0.173778	0.209927	-0.179387	-0.169855	-0.123398	-0.0526909	-0.138735	-0.156023	-0.102349	0.0342888	0.024974	0.0425578
Q92947	GCDH	Glutaryl-CoA dehydrogenase, mitochondrial OS=Homo sapiens GN=GCDH PE=1 SV=1	60.274	22	125	22	2	0	438	48.1	6.54409e-10	-0.122884	0.122615	-0.114756	1.23168e-09	0.904271	2.62287e-08	0.245499	0.00812812	-0.237371	0	0	0	-0.124671	-0.143941	-0.151284	-0.099213	-0.105789	-0.112409	0.127696	0.12656	0.141609	0.184255	0.0897879	0.0944826	0.0939141	-0.102836	-0.11831	-0.123123
P08183	ABCB1	Multidrug resistance protein 1 OS=Homo sapiens GN=ABCB1 PE=1 SV=3	22.7344	23	51	22	0	1	1280	141.4	6.9949e-10	0.720098	-0.797421	0.174773	5.3722e-10	0.000664477	1.44096e-06	-1.51752	-0.545325	0.972195	1	1	1	0.742427	0.695542	0.719357	0.698632	0.724325	0.740308	-1.13625	-0.949512	-0.746058	-0.899968	-0.504362	-0.812951	-0.532848	0.18843	0.174544	0.161345
Q9H788	SH2D4A	SH2 domain-containing protein 4A OS=Homo sapiens GN=SH2D4A PE=1 SV=1	5.94714	2	2	2	0	0	454	52.7	7.02808e-10	1.14128	-0.770601	-1.12346	2.38138e-09	5.68264e-09	0.0882434	-1.91188	-2.26474	-0.352859	1	1	1	1.1285	1.16524	1.1086	1.1137	1.1714	1.16023	-1.04271	-0.978462	-0.27781	-0.523983	-0.591276	-1.14076	-0.839204	-1.04503	-1.27104	-1.05432
P21359	NF1	Neurofibromin OS=Homo sapiens GN=NF1 PE=1 SV=2	32.441	76	232	76	0	0	2839	319.2	7.54323e-10	0.0775545	-0.0895351	0.0638225	1.17744e-09	0.548957	4.70728e-08	-0.16709	-0.0137319	0.153358	0	0	0	0.0673312	0.0539043	0.0475124	0.0838654	0.0915974	0.121116	-0.0972414	-0.0875251	-0.104014	-0.0818733	-0.0838729	-0.0959708	-0.076248	0.0635207	0.0660451	0.0619018
Q8WTT2	NOC3L	Nucleolar complex protein 3 homolog OS=Homo sapiens GN=NOC3L PE=1 SV=1	51	37	198	37	37	0	800	92.5	7.58521e-10	-0.085897	0.0787099	-0.0932324	1.9437e-09	0.84529	1.62013e-08	0.164607	-0.0073354	-0.171942	0	0	0	-0.106459	-0.0703787	-0.123476	-0.0748474	-0.0644521	-0.0757695	0.0941636	0.0715604	0.0938861	0.0803657	0.0471151	0.0760524	0.0878258	-0.0997828	-0.0832241	-0.0966903
P30279	CCND2	G1/S-specific cyclin-D2 OS=Homo sapiens GN=CCND2 PE=1 SV=1	46.3668	11	40	10	3	0	289	33	7.67615e-10	0.563169	-0.170312	-0.345933	3.35337e-09	4.57652e-09	0.0295757	-0.733481	-0.909103	-0.175622	1	1	0	0.578625	0.505813	0.499918	0.617159	0.602534	0.574968	-0.164233	-0.170637	-0.0591678	-0.0263624	-0.309384	-0.338332	-0.124063	-0.344407	-0.306185	-0.387208
O76021	RSL1D1	Ribosomal L1 domain-containing protein 1 OS=Homo sapiens GN=RSL1D1 PE=1 SV=3	53.2653	28	357	1	0	34	490	54.9	7.69696e-10	-0.150974	0.0829771	-0.0636617	5.75103e-10	0.000501228	1.97147e-06	0.233951	0.0873125	-0.146639	0	0	0	-0.14726	-0.135877	-0.18414	-0.153197	-0.11847	-0.166902	0.0920145	0.0857937	0.0618731	0.0619794	0.0524337	0.0938454	0.1329	-0.0570195	-0.0569129	-0.0770528
O14949	UQCRQ	Cytochrome b-c1 complex subunit 8 OS=Homo sapiens GN=UQCRQ PE=1 SV=4	54.878	5	37	5	5	0	82	9.9	7.77326e-10	0.366819	-0.212036	-0.12505	7.76798e-10	1.03918e-07	0.133993	-0.578855	-0.491869	0.086986	1	1	0	0.29988	0.361438	0.4007	0.408323	0.34398	0.386594	-0.23697	-0.258722	-0.151309	-0.0576322	-0.241318	-0.273788	-0.264513	-0.0891793	-0.146205	-0.139765
Q9Y375	NDUFAF1	Complex I intermediate-associated protein 30, mitochondrial OS=Homo sapiens GN=NDUFAF1 PE=1 SV=2	55.9633	14	36	14	2	0	327	37.7	7.85747e-10	0.149654	-0.106615	-0.0781149	8.71981e-10	6.84011e-08	0.313904	-0.256269	-0.227769	0.0285003	0	0	0	0.134953	0.138742	0.111406	0.17647	0.189738	0.146613	-0.0810702	-0.0664654	-0.0961414	-0.120561	-0.155568	-0.0991429	-0.127357	-0.0797218	-0.079149	-0.0754739
Q01415	GALK2	N-acetylgalactosamine kinase OS=Homo sapiens GN=GALK2 PE=1 SV=1	62.2271	24	132	24	0	0	458	50.3	8.20526e-10	0.148946	-0.138344	0.0708807	7.3448e-10	0.00729752	4.51258e-07	-0.28729	-0.078065	0.209225	0	0	0	0.133033	0.140653	0.141066	0.174815	0.145769	0.158338	-0.119628	-0.0837632	-0.130704	-0.19603	-0.109349	-0.138251	-0.190683	0.0754381	0.0578384	0.0793654
Q4LE39	ARID4B	AT-rich interactive domain-containing protein 4B OS=Homo sapiens GN=ARID4B PE=1 SV=2	35.5183	41	124	38	0	3	1312	147.7	8.35489e-10	0.0810438	-0.0851849	0.0679933	1.3154e-09	0.582813	5.01663e-08	-0.166229	-0.0130505	0.153178	0	0	0	0.0812445	0.084375	0.086874	0.0723335	0.0611853	0.100251	-0.0767081	-0.067413	-0.0873104	-0.102801	-0.0815164	-0.123309	-0.0572359	0.0859558	0.0569914	0.0610329
Q6PI48	DARS2	Aspartate--tRNA ligase, mitochondrial OS=Homo sapiens GN=DARS2 PE=1 SV=1	59.5349	35	262	35	35	0	645	73.5	8.40773e-10	0.264648	-0.113733	-0.0398418	7.50615e-10	1.91034e-07	0.0445737	-0.37838	-0.30449	0.0738907	0	1	0	0.280063	0.266119	0.248041	0.27406	0.260345	0.25926	-0.186641	-0.16576	-0.0722485	-0.043687	-0.118033	-0.152578	-0.0571805	-0.0544092	-0.0279038	-0.0372123
O75845	SC5D	Lathosterol oxidase OS=Homo sapiens GN=SC5D PE=1 SV=2	5.35117	2	8	2	1	0	299	35.3	8.44005e-10	-0.483603	0.234058	-0.279899	7.34434e-10	0.00537705	5.47962e-07	0.717661	0.203703	-0.513957	1	0	1	-0.53321	-0.507317	-0.494207	-0.41008	-0.458025	-0.498776	0.182591	0.149078	0.0880006	0.284629	0.284866	0.253436	0.395806	-0.270012	-0.267248	-0.302437
Q01813	PFKP	ATP-dependent 6-phosphofructokinase, platelet type OS=Homo sapiens GN=PFKP PE=1 SV=2	65.6888	44	754	28	1	29	784	85.5	8.50317e-10	0.155435	-0.12098	0.0616325	6.64911e-10	0.0012663	1.2529e-06	-0.276415	-0.0938023	0.182612	0	0	0	0.144581	0.177639	0.130046	0.159206	0.149583	0.171553	-0.12045	-0.121638	-0.115488	-0.0569709	-0.117755	-0.124108	-0.190448	0.0589832	0.0556025	0.0703118
Q9H6F5	CCDC86	Coiled-coil domain-containing protein 86 OS=Homo sapiens GN=CCDC86 PE=1 SV=1	64.7222	17	137	17	7	0	360	40.2	8.62191e-10	-0.245639	0.130665	-0.052644	5.6943e-10	2.25579e-05	2.99035e-05	0.376304	0.192995	-0.183309	0	0	0	-0.291092	-0.277617	-0.268669	-0.245847	-0.174367	-0.216243	0.168796	0.191042	0.136032	0.109767	0.0742194	0.111528	0.123273	-0.0352545	-0.0658298	-0.0568476
Q9BY67-3	CADM1	Isoform 3 of Cell adhesion molecule 1 OS=Homo sapiens GN=CADM1	33.121	9	54	9	0	0	471	51.5	8.68319e-10	-0.689233	0.25545	0.139585	9.27826e-10	8.50377e-08	0.254055	0.944682	0.828817	-0.115865	1	1	0	-0.749844	-0.660065	-0.797504	-0.625854	-0.661719	-0.640409	0.293362	0.39882	0.311911	0.421616	0.113057	0.108279	0.141102	0.158493	0.133653	0.126608
Q8TDX7	NEK7	Serine/threonine-protein kinase Nek7 OS=Homo sapiens GN=NEK7 PE=1 SV=1	44.702	15	55	14	6	3	302	34.5	9.02368e-10	0.166516	-0.173622	0.0626564	7.48043e-10	0.00317663	7.927e-07	-0.340138	-0.10386	0.236278	0	0	0	0.170495	0.145634	0.156903	0.208001	0.179895	0.138168	-0.115692	-0.150455	-0.121945	-0.189867	-0.187029	-0.210132	-0.240231	0.0542507	0.0539048	0.0798137
P50851-2	LRBA	Isoform 2 of Lipopolysaccharide-responsive and beige-like anchor protein OS=Homo sapiens GN=LRBA	46.7204	106	432	42	0	76	2851	317.5	9.06016e-10	0.124758	-0.148817	0.130007	2.07757e-09	0.969326	2.34088e-08	-0.273576	0.00524823	0.278824	0	0	0	0.119248	0.131194	0.121586	0.121812	0.11631	0.1384	-0.187663	-0.146831	-0.134415	-0.223508	-0.0875914	-0.13618	-0.125534	0.13258	0.11238	0.14506
P30043	BLVRB	Flavin reductase (NADPH) OS=Homo sapiens GN=BLVRB PE=1 SV=3	76.699	14	231	14	6	0	206	22.1	9.18281e-10	0.117918	-0.135037	0.132332	2.47201e-09	0.769373	1.78443e-08	-0.252955	0.014414	0.267369	0	0	0	0.0900766	0.106922	0.109376	0.0965969	0.141186	0.163351	-0.126758	-0.096936	-0.197571	-0.138586	-0.102647	-0.145341	-0.137418	0.125042	0.150227	0.121727
P31689	DNAJA1	DnaJ homolog subfamily A member 1 OS=Homo sapiens GN=DNAJA1 PE=1 SV=2	66.4987	24	569	24	4	0	397	44.8	9.32793e-10	-0.146976	0.135395	0.0102494	6.1172e-10	1.0072e-05	8.29245e-05	0.282371	0.157226	-0.125145	0	0	0	-0.140589	-0.136348	-0.171937	-0.180624	-0.134406	-0.117954	0.186334	0.165081	0.106874	0.1467	0.0790195	0.143224	0.12053	0.00165683	0.00888466	0.0202068
Q12955-4	ANK3	Isoform 2 of Ankyrin-3 OS=Homo sapiens GN=ANK3	36.0278	54	201	45	0	1	1868	204	9.59826e-10	-0.106568	0.0614061	-0.0433461	7.0301e-10	0.000542294	2.53401e-06	0.167974	0.0632215	-0.104752	0	0	0	-0.120785	-0.103853	-0.110255	-0.0964539	-0.109723	-0.0983362	0.0937917	0.0762898	0.043483	0.0339174	0.0421645	0.0744487	0.0657475	-0.0223288	-0.0545757	-0.0531339
Q9H3Q1	CDC42EP4	Cdc42 effector protein 4 OS=Homo sapiens GN=CDC42EP4 PE=1 SV=1	73.0337	22	99	22	0	0	356	38	9.8975e-10	0.210163	-0.189456	0.0866151	8.09669e-10	0.00304291	9.12524e-07	-0.399619	-0.123548	0.276072	0	0	0	0.211797	0.194765	0.247704	0.227783	0.199576	0.179351	-0.221238	-0.135019	-0.111758	-0.200994	-0.16886	-0.285572	-0.202754	0.0904531	0.0871848	0.0822074
Q53SF7-2	COBLL1	Isoform 2 of Cordon-bleu protein-like 1 OS=Homo sapiens GN=COBLL1	53.6878	47	193	2	0	65	1166	127.6	1.05492e-09	-0.132028	0.0116016	0.109122	4.41557e-08	1.45066e-09	3.89925e-05	0.14363	0.24115	0.09752	0	0	0	-0.134789	-0.137847	-0.180429	-0.143251	-0.0976247	-0.0982274	0.00982068	0.0239336	-0.00797751	0.00987258	0.00790048	0.013613	0.0240483	0.112039	0.1168	0.0985265
P32019	INPP5B	Type II inositol 1,4,5-trisphosphate 5-phosphatase OS=Homo sapiens GN=INPP5B PE=1 SV=4	27.996	26	83	2	0	24	993	112.8	1.05719e-09	0.0915328	-0.109424	0.0719593	1.5433e-09	0.452694	7.54232e-08	-0.200957	-0.0195734	0.181384	0	0	0	0.0908804	0.0788512	0.062248	0.0997556	0.101163	0.116299	-0.0820679	-0.105169	-0.108301	-0.0879775	-0.0933671	-0.140033	-0.149057	0.0936813	0.0618079	0.0603887
P09960	LTA4H	Leukotriene A-4 hydrolase OS=Homo sapiens GN=LTA4H PE=1 SV=2	63.5025	36	425	36	0	0	611	69.2	1.1225e-09	0.223684	-0.205016	0.104714	9.73768e-10	0.00744797	6.5337e-07	-0.4287	-0.11897	0.30973	1	0	0	0.20712	0.23954	0.218452	0.234678	0.22301	0.219304	-0.138767	-0.150943	-0.167255	-0.15956	-0.250812	-0.261079	-0.306693	0.102371	0.0941865	0.117584
Q5VW32	BROX	BRO1 domain-containing protein BROX OS=Homo sapiens GN=BROX PE=1 SV=1	56.4477	17	90	17	0	0	411	46.4	1.13376e-09	0.173175	-0.135391	0.0718881	8.8777e-10	0.00202866	1.37321e-06	-0.308566	-0.101287	0.207279	0	0	0	0.154945	0.15936	0.151965	0.18405	0.191321	0.19741	-0.105392	-0.090206	-0.116201	-0.134295	-0.124947	-0.151916	-0.224781	0.0660033	0.0645915	0.0850695
Q8IZ81	ELMOD2	ELMO domain-containing protein 2 OS=Homo sapiens GN=ELMOD2 PE=1 SV=1	38.2253	11	72	11	1	0	293	34.9	1.14229e-09	-0.13302	0.135472	-0.00315079	7.47668e-10	5.24431e-05	2.08293e-05	0.268492	0.129869	-0.138622	0	0	0	-0.160114	-0.129726	-0.141578	-0.113904	-0.14422	-0.108575	0.112243	0.155208	0.119924	0.193351	0.146303	0.0819083	0.139364	0.00332132	0.0131978	-0.0259715
Q9UII4	HERC5	E3 ISG15--protein ligase HERC5 OS=Homo sapiens GN=HERC5 PE=1 SV=2	28.6133	24	53	23	11	1	1024	116.8	1.16e-09	0.166234	-0.0161313	-0.147075	5.93426e-08	1.47863e-09	2.82297e-05	-0.182365	-0.313309	-0.130943	0	1	0	0.164827	0.137703	0.186519	0.188989	0.170218	0.14915	-0.0512563	-0.00114081	-0.0339279	-0.0566554	0.0305456	-0.0203574	0.0198731	-0.126455	-0.164532	-0.150237
O95834-3	EML2	Isoform 3 of Echinoderm microtubule-associated protein-like 2 OS=Homo sapiens GN=EML2	26.1176	19	52	19	0	0	850	92	1.18716e-09	0.289211	-0.280673	0.0735743	8.55751e-10	0.000600281	3.16888e-06	-0.569884	-0.215637	0.354247	1	0	0	0.265934	0.271473	0.311188	0.35649	0.259885	0.270299	-0.23079	-0.230023	-0.248287	-0.192654	-0.2742	-0.38365	-0.405108	0.0796276	0.0610981	0.0799971
Q9UKT4	FBXO5	F-box only protein 5 OS=Homo sapiens GN=FBXO5 PE=1 SV=1	34.2282	15	28	15	2	0	447	50.1	1.19462e-09	0.0702796	-0.155035	0.144302	1.1925e-08	0.00947682	5.09248e-09	-0.225314	0.0740224	0.299337	0	0	0	0.0263508	0.0625561	0.0480661	0.0672435	0.101634	0.115827	-0.1641	-0.124626	-0.116346	-0.168817	-0.187342	-0.17683	-0.147184	0.175582	0.12209	0.135233
O43159	RRP8	Ribosomal RNA-processing protein 8 OS=Homo sapiens GN=RRP8 PE=1 SV=2	50.2193	20	103	20	2	0	456	50.7	1.22382e-09	-0.128993	0.121509	-0.136752	2.93432e-09	0.926368	2.8678e-08	0.250501	-0.00775908	-0.258261	0	0	0	-0.107668	-0.164536	-0.08675	-0.144082	-0.127386	-0.143533	0.127651	0.102411	0.138897	0.141891	0.112467	0.0623373	0.164908	-0.139344	-0.117121	-0.15379
P30488	HLA-B	HLA class I histocompatibility antigen, B-50 alpha chain OS=Homo sapiens GN=HLA-B PE=1 SV=1	45.0276	16	98	5	0	0	362	40.5	1.24079e-09	0.271646	-0.272649	0.175358	1.39197e-09	0.0964783	2.03161e-07	-0.544295	-0.0962881	0.448007	1	0	1	0.215407	0.287597	0.316675	0.300355	0.214429	0.295413	-0.329431	-0.260908	-0.159302	-0.278963	-0.248988	-0.379937	-0.251013	0.207859	0.10275	0.215465
P49588	AARS	Alanine--tRNA ligase, cytoplasmic OS=Homo sapiens GN=AARS PE=1 SV=2	71.9008	59	1131	59	2	0	968	106.7	1.24208e-09	0.107726	-0.0393245	-0.0621658	3.66231e-09	1.19409e-08	0.181983	-0.147051	-0.169892	-0.0228413	0	0	0	0.0821001	0.120523	0.103752	0.127195	0.113765	0.0990226	-0.0167881	-0.0381855	-0.0379327	-0.0322245	-0.0345172	-0.0319899	-0.0836336	-0.057645	-0.0691973	-0.0596552
P23743	DGKA	Diacylglycerol kinase alpha OS=Homo sapiens GN=DGKA PE=1 SV=3	37.1429	21	61	21	2	0	735	82.6	1.27412e-09	0.129038	-0.112492	0.0674951	1.15761e-09	0.0142943	5.40994e-07	-0.241529	-0.0615425	0.179987	0	0	0	0.122738	0.121282	0.107157	0.136765	0.122027	0.164256	-0.120147	-0.0926104	-0.0890666	-0.0994199	-0.0767918	-0.173073	-0.136334	0.0788744	0.0699617	0.0536491
Q15118	PDK1	[Pyruvate dehydrogenase (acetyl-transferring)] kinase isozyme 1, mitochondrial OS=Homo sapiens GN=PDK1 PE=1 SV=1	46.5596	17	48	15	0	2	436	49.2	1.27737e-09	0.13615	-0.126019	0.0509787	1.00002e-09	0.00238371	1.4547e-06	-0.262168	-0.0851709	0.176997	0	0	0	0.129895	0.107187	0.142794	0.160025	0.121017	0.15598	-0.155006	-0.1339	-0.128373	-0.145125	-0.122273	-0.149997	-0.0474546	0.0601576	0.0451503	0.0476282
Q16891-2	IMMT	Isoform 2 of MICOS complex subunit MIC60 OS=Homo sapiens GN=IMMT	72.9585	61	839	4	0	77	747	82.6	1.29266e-09	-0.13435	0.0743669	-0.0366112	8.46973e-10	8.06968e-05	1.70963e-05	0.208717	0.0977386	-0.110978	0	0	0	-0.192536	-0.115845	-0.119807	-0.0959811	-0.140282	-0.141649	0.0851862	0.0639332	0.0702785	0.0640233	0.0893508	0.0693239	0.0784725	-0.0485903	-0.0314004	-0.029843
Q96EB1	ELP4	Elongator complex protein 4 OS=Homo sapiens GN=ELP4 PE=1 SV=2	51.8868	16	46	16	2	0	424	46.6	1.32202e-09	0.187716	-0.139241	0.0599143	9.31577e-10	0.000479696	4.29821e-06	-0.326956	-0.127801	0.199155	0	0	0	0.153212	0.206511	0.166915	0.186294	0.189927	0.223435	-0.138351	-0.0676276	-0.101965	-0.164069	-0.147679	-0.21144	-0.143553	0.0657307	0.061853	0.0521591
Q99963	SH3GL3	Endophilin-A3 OS=Homo sapiens GN=SH3GL3 PE=1 SV=1	46.3977	15	50	15	0	0	347	39.3	1.34926e-09	0.598523	-0.556731	0.0563058	8.81355e-10	8.15951e-05	1.8098e-05	-1.15525	-0.542217	0.613037	1	1	1	0.605984	0.601451	0.634629	0.637101	0.550818	0.561154	-0.46004	-0.4499	-0.339328	-0.429213	-0.688942	-0.758931	-0.770766	0.0584275	0.06839	0.0420998
Q8N6C5-4	IGSF1	Isoform 4 of Immunoglobulin superfamily member 1 OS=Homo sapiens GN=IGSF1	1.86428	2	3	2	0	0	1341	149.3	1.36641e-09	0.316863	-0.469572	0.210904	1.74413e-09	0.243672	1.40538e-07	-0.786435	-0.105959	0.680476	1	0	1	0.281205	0.273062	0.339182	0.343117	0.403046	0.261566	-0.487693	-0.564582	-0.672262	-0.364368	-0.350572	-0.379015	-0.46851	0.245741	0.215231	0.171741
Q15233	NONO	Non-POU domain-containing octamer-binding protein OS=Homo sapiens GN=NONO PE=1 SV=4	79.1932	50	1934	46	0	5	471	54.2	1.37756e-09	-0.137769	0.0404019	0.0252988	1.61299e-09	8.9298e-08	0.530521	0.178171	0.163068	-0.0151031	0	0	0	-0.109949	-0.164943	-0.14097	-0.150096	-0.1298	-0.130859	0.03639	0.039891	0.0256976	0.0238487	0.0156619	0.0751651	0.0661588	0.0161958	0.0408513	0.0188493
P08243	ASNS	Asparagine synthetase [glutamine-hydrolyzing] OS=Homo sapiens GN=ASNS PE=1 SV=4	70.5882	44	1035	44	0	0	561	64.3	1.39834e-09	0.0140836	0.102937	-0.195319	8.19632e-05	8.93627e-08	8.9259e-10	0.0888535	-0.209403	-0.298256	0	0	0	0.0112247	0.0231013	-0.0194291	0.0220775	0.027579	0.0199484	0.107906	0.133346	0.126819	0.1341	0.0911324	0.0874808	0.0397756	-0.198991	-0.186076	-0.20089
Q9Y3T9	NOC2L	Nucleolar complex protein 2 homolog OS=Homo sapiens GN=NOC2L PE=1 SV=4	40.0534	31	283	31	31	0	749	84.9	1.41121e-09	-0.114553	0.0943004	-0.114655	2.97452e-09	0.999981	4.18023e-08	0.208853	-0.000102611	-0.208956	0	0	0	-0.144024	-0.109735	-0.129646	-0.106219	-0.0925842	-0.105108	0.0978691	0.0767123	0.107044	0.149702	0.0735018	0.0519972	0.103276	-0.125882	-0.107391	-0.110693
Q9Y5M8	SRPRB	Signal recognition particle receptor subunit beta OS=Homo sapiens GN=SRPRB PE=1 SV=3	64.2066	18	117	18	4	0	271	29.7	1.45086e-09	-0.2089	0.156465	-0.142969	1.60232e-09	0.0934337	2.45186e-07	0.365366	0.0659312	-0.299435	0	0	0	-0.221986	-0.202895	-0.232545	-0.218725	-0.160031	-0.217221	0.148194	0.124675	0.085625	0.258026	0.148763	0.171856	0.158119	-0.154295	-0.111053	-0.163559
P98172	EFNB1	Ephrin-B1 OS=Homo sapiens GN=EFNB1 PE=1 SV=1	56.9364	18	173	15	15	7	346	38	1.47745e-09	-0.241181	0.157621	-0.0770911	1.00986e-09	0.000320537	6.75107e-06	0.398802	0.16409	-0.234712	0	0	0	-0.26172	-0.185802	-0.262293	-0.210884	-0.242303	-0.284083	0.138802	0.100715	0.163606	0.0825376	0.19469	0.198495	0.224501	-0.0675448	-0.0920648	-0.0716638
Q14865	ARID5B	AT-rich interactive domain-containing protein 5B OS=Homo sapiens GN=ARID5B PE=1 SV=3	24.7475	22	45	22	0	0	1188	132.3	1.48399e-09	0.100314	-0.206571	0.213885	1.83145e-08	0.00530874	5.35765e-09	-0.306885	0.113572	0.420457	0	0	1	0.113902	0.0971924	0.064154	0.108616	0.108679	0.109339	-0.199678	-0.166022	-0.16545	-0.317495	-0.184211	-0.254312	-0.158832	0.22366	0.212326	0.20567
O95881	TXNDC12	Thioredoxin domain-containing protein 12 OS=Homo sapiens GN=TXNDC12 PE=1 SV=1	63.3721	9	220	9	8	0	172	19.2	1.5006e-09	-0.208152	0.16866	-0.138108	1.62927e-09	0.0833712	2.69377e-07	0.376812	0.0700441	-0.306767	0	0	0	-0.221088	-0.209328	-0.269996	-0.179607	-0.179703	-0.189188	0.124984	0.132451	0.0906037	0.206515	0.193007	0.207137	0.225922	-0.142238	-0.114354	-0.157731
O43934	MFSD11	UNC93-like protein MFSD11 OS=Homo sapiens GN=MFSD11 PE=2 SV=2	2.00445	1	2	1	0	0	449	49.2	1.51687e-09	-0.365189	0.16056	-0.136308	1.01064e-09	0.000189386	1.0574e-05	0.525749	0.228881	-0.296869	1	0	0	-0.412203	-0.326042	-0.34758	-0.330592	-0.410205	-0.364513	0.122548	0.120975	0.0996358	0.29496	0.106164	0.2322	0.147439	-0.113549	-0.135352	-0.160024
Q8NG06	TRIM58	E3 ubiquitin-protein ligase TRIM58 OS=Homo sapiens GN=TRIM58 PE=2 SV=2	37.6543	13	36	13	13	0	486	54.7	1.53749e-09	0.21044	-0.134929	0.0237157	9.7653e-10	2.10635e-05	8.64568e-05	-0.34537	-0.186725	0.158645	0	0	0	0.213808	0.175812	0.17514	0.199743	0.244093	0.254047	-0.131162	-0.082197	-0.0905458	-0.127703	-0.169645	-0.201413	-0.141839	0.0314957	0.0479281	-0.0082767
Q8WWV3	RTN4IP1	Reticulon-4-interacting protein 1, mitochondrial OS=Homo sapiens GN=RTN4IP1 PE=1 SV=2	51.0101	16	55	16	0	0	396	43.6	1.55931e-09	0.191752	-0.0927431	-0.0284287	1.26236e-09	5.03686e-07	0.026102	-0.284495	-0.22018	0.0643144	0	0	0	0.158006	0.209637	0.186029	0.208896	0.186508	0.201433	-0.139443	-0.0895376	-0.0881479	-0.0632759	-0.0542856	-0.152947	-0.061564	-0.0420376	0.00334312	-0.0465915
Q8TAP6	CEP76	Centrosomal protein of 76 kDa OS=Homo sapiens GN=CEP76 PE=1 SV=1	28.3763	15	35	15	0	0	659	74.4	1.59363e-09	0.078776	-0.0939489	-0.0083158	1.01567e-09	4.48256e-05	4.15242e-05	-0.172725	-0.0870918	0.0856331	0	0	0	0.0913298	0.0559396	0.0792494	0.0736552	0.0939873	0.0784947	-0.0930797	-0.0811743	-0.095737	-0.0541016	-0.0981363	-0.128212	-0.107201	-0.00359134	-0.0244707	0.00311463
Q5VV42	CDKAL1	Threonylcarbamoyladenosine tRNA methylthiotransferase OS=Homo sapiens GN=CDKAL1 PE=1 SV=1	60.6218	26	141	4	2	31	579	65.1	1.60278e-09	-0.160035	0.0391571	0.0994029	9.48371e-09	7.0038e-09	0.0122653	0.199192	0.259438	0.0602458	0	0	0	-0.167377	-0.139731	-0.200788	-0.171986	-0.149586	-0.130742	0.0244035	0.0531998	0.0300778	0.0191715	0.0553827	0.00995271	0.0819113	0.0958626	0.128305	0.0740406
O14841	OPLAH	5-oxoprolinase OS=Homo sapiens GN=OPLAH PE=1 SV=3	33.8509	31	74	31	25	0	1288	137.4	1.61492e-09	-0.0525848	-0.152702	0.328207	0.00236966	2.64278e-08	1.11796e-09	-0.100117	0.380791	0.480908	0	1	1	-0.0894045	-0.0227471	-0.0338843	-0.0351638	-0.0768968	-0.0574121	-0.112002	-0.131771	-0.164766	-0.0552303	-0.196356	-0.21479	-0.193997	0.319835	0.326009	0.338776
Q9NT62	ATG3	Ubiquitin-like-conjugating enzyme ATG3 OS=Homo sapiens GN=ATG3 PE=1 SV=1	48.4076	11	75	11	2	0	314	35.8	1.65312e-09	0.188769	-0.137655	0.0412226	1.08171e-09	0.00013969	1.54763e-05	-0.326424	-0.147546	0.178878	0	0	0	0.14088	0.234005	0.209426	0.189276	0.174433	0.184594	-0.116974	-0.117771	-0.147476	-0.083195	-0.128947	-0.151797	-0.217427	0.0430133	0.0226157	0.0580388
Q9BW30	TPPP3	Tubulin polymerization-promoting protein family member 3 OS=Homo sapiens GN=TPPP3 PE=1 SV=1	68.1818	16	67	16	15	0	176	19	1.72238e-09	0.228832	-0.285471	0.128906	1.81833e-09	0.0719091	3.38101e-07	-0.514304	-0.0999266	0.414377	1	0	1	0.168128	0.245485	0.281117	0.227266	0.206707	0.244291	-0.20507	-0.268779	-0.193918	-0.382062	-0.268738	-0.304832	-0.374899	0.133837	0.0868337	0.166046
Q8TCC3-2	MRPL30	Isoform 2 of 39S ribosomal protein L30, mitochondrial OS=Homo sapiens GN=MRPL30	37.1728	6	26	6	0	0	191	21.8	1.84534e-09	0.287894	-0.0876448	-0.0769978	2.58929e-09	6.954e-08	0.933598	-0.375539	-0.364892	0.010647	0	1	0	0.244461	0.282527	0.267131	0.277947	0.280479	0.374818	-0.127096	-0.123978	-0.032423	-0.00559887	-0.112202	-0.09952	-0.112696	-0.0968615	-0.0699416	-0.0641901
P52926	HMGA2	High mobility group protein HMGI-C OS=Homo sapiens GN=HMGA2 PE=1 SV=1	56.8807	5	55	5	1	0	109	11.8	1.85462e-09	-0.246485	0.219429	-0.238448	3.6301e-09	0.977243	6.2938e-08	0.465914	0.00803754	-0.457876	1	0	1	-0.3137	-0.210733	-0.231263	-0.187785	-0.255112	-0.280319	0.240109	0.149825	0.203715	0.34867	0.203557	0.183757	0.206367	-0.204393	-0.299075	-0.211876
Q9NWK9	ZNHIT6	Box C/D snoRNA protein 1 OS=Homo sapiens GN=ZNHIT6 PE=1 SV=1	60.2128	28	78	28	4	0	470	53.9	1.90706e-09	-0.365748	0.145529	-0.0114875	1.33437e-09	1.8793e-06	0.00366074	0.511278	0.354261	-0.157017	1	1	0	-0.38117	-0.376924	-0.466894	-0.39177	-0.272025	-0.305708	0.174864	0.236941	0.0729605	0.123576	0.120651	0.145372	0.14434	-0.0153437	0.0201582	-0.0392769
Q15800	MSMO1	Methylsterol monooxygenase 1 OS=Homo sapiens GN=MSMO1 PE=1 SV=1	18.43	4	47	4	0	0	293	35.2	1.98256e-09	-0.397491	0.279886	-0.367793	3.4914e-09	0.862335	8.41266e-08	0.677377	0.029698	-0.647679	1	0	1	-0.45122	-0.411276	-0.399212	-0.363758	-0.387762	-0.371717	0.217986	0.159759	0.175703	0.323265	0.428654	0.420049	0.233789	-0.381783	-0.406435	-0.31516
P16152	CBR1	Carbonyl reductase [NADPH] 1 OS=Homo sapiens GN=CBR1 PE=1 SV=3	79.4224	18	231	15	9	3	277	30.4	1.98377e-09	0.22103	-0.105806	-0.0598652	1.95614e-09	2.26751e-07	0.209398	-0.326836	-0.280895	0.0459405	0	1	0	0.20866	0.222657	0.22242	0.231284	0.224216	0.216943	-0.0410788	-0.0540519	-0.0755346	-0.136101	-0.104402	-0.139401	-0.19007	-0.0716189	-0.0687321	-0.0392446
Q12756	KIF1A	Kinesin-like protein KIF1A OS=Homo sapiens GN=KIF1A PE=1 SV=2	68.6391	102	607	79	1	35	1690	190.9	2.0226e-09	0.079134	-0.0612684	0.0282269	1.45755e-09	0.00126894	3.94361e-06	-0.140402	-0.0509071	0.0894953	0	0	0	0.0555156	0.0717221	0.106198	0.0719656	0.0790869	0.0903162	-0.0662101	-0.0662368	-0.0664063	-0.0770757	-0.0406515	-0.0709377	-0.0413609	0.0427843	0.0154495	0.0264469
Q14558-2	PRPSAP1	Isoform 2 of Phosphoribosyl pyrophosphate synthase-associated protein 1 OS=Homo sapiens GN=PRPSAP1	74.5455	28	197	25	3	4	385	42.4	2.06428e-09	0.113175	-0.106279	0.0862429	2.72363e-09	0.327601	1.8378e-07	-0.219454	-0.0269321	0.192522	0	0	0	0.0841593	0.10458	0.10071	0.136197	0.145418	0.107987	-0.0837967	-0.0835042	-0.10701	-0.150278	-0.0676484	-0.115103	-0.136615	0.071746	0.0876467	0.099336
Q9P0W2	HMG20B	SWI/SNF-related matrix-associated actin-dependent regulator of chromatin subfamily E member 1-related OS=Homo sapiens GN=HMG20B PE=1 SV=1	68.1388	21	49	20	0	1	317	35.8	2.08248e-09	0.0993912	-0.113713	0.114038	5.87371e-09	0.719094	3.65947e-08	-0.213105	0.014647	0.227752	0	0	0	0.0888106	0.116724	0.104796	0.0959865	0.0712015	0.118828	-0.0940092	-0.107087	-0.0699365	-0.13705	-0.139428	-0.106244	-0.142239	0.158751	0.087818	0.0955458
Q92567-2	FAM168A	Isoform 2 of Protein FAM168A OS=Homo sapiens GN=FAM168A	31.9149	3	12	3	0	0	235	25	2.15129e-09	0.0482235	-0.207084	0.21025	1.03876e-07	0.000195377	3.57496e-09	-0.255307	0.162026	0.417334	0	0	1	0.0227012	0.0912886	0.0572317	0.0730124	0.0400595	0.00504787	-0.191617	-0.164794	-0.209548	-0.161484	-0.229736	-0.282628	-0.209781	0.242975	0.150248	0.237527
Q14571	ITPR2	Inositol 1,4,5-trisphosphate receptor type 2 OS=Homo sapiens GN=ITPR2 PE=1 SV=2	38.8745	90	286	71	64	5	2701	307.9	2.15935e-09	0.0137924	-0.179559	0.286161	4.09505e-06	1.29332e-06	1.55628e-09	-0.193351	0.272368	0.46572	0	0	1	-0.000929599	0.0267408	-0.00170755	0.0202654	0.0112005	0.0271847	-0.271841	-0.233143	-0.117375	-0.207877	-0.119279	-0.169526	-0.137873	0.289131	0.297124	0.272227
P16260	SLC25A16	Graves disease carrier protein OS=Homo sapiens GN=SLC25A16 PE=1 SV=3	39.1566	12	34	12	10	0	332	36.2	2.16217e-09	-0.330275	0.152437	0.00383695	1.50527e-09	2.12929e-06	0.0038751	0.482712	0.334112	-0.1486	1	1	0	-0.354727	-0.338615	-0.388211	-0.308702	-0.295361	-0.296035	0.126036	0.0856158	0.0377621	0.193682	0.195753	0.224958	0.203253	0.00908779	0.0194317	-0.0170086
Q9NQU5	PAK6	Serine/threonine-protein kinase PAK 6 OS=Homo sapiens GN=PAK6 PE=1 SV=1	8.2232	4	9	3	0	0	681	74.8	2.22374e-09	-0.752801	0.261659	0.360008	5.0769e-09	3.11058e-08	0.504069	1.01446	1.11281	0.0983493	1	1	0	-0.933851	-0.568196	-0.778062	-0.860076	-0.804645	-0.571975	0.319508	0.401888	0.319615	0.201053	0.170842	0.194394	0.224312	0.258041	0.526645	0.295338
Q96P70	IPO9	Importin-9 OS=Homo sapiens GN=IPO9 PE=1 SV=3	47.1662	39	279	39	39	0	1041	115.9	2.26825e-09	0.125564	-0.0896059	0.00756779	1.41865e-09	2.52028e-05	0.000138617	-0.21517	-0.117996	0.0971737	0	0	0	0.104317	0.136917	0.108544	0.128859	0.129598	0.145146	-0.0647838	-0.0502746	-0.07055	-0.105158	-0.0896481	-0.110637	-0.13619	-0.00727035	0.00174484	0.0282289
Q13217	DNAJC3	DnaJ homolog subfamily C member 3 OS=Homo sapiens GN=DNAJC3 PE=1 SV=1	57.1429	30	155	29	6	0	504	57.5	2.30099e-09	-0.0908386	0.0898231	-0.0625552	2.71262e-09	0.177769	2.90403e-07	0.180662	0.0282834	-0.152378	0	0	0	-0.125433	-0.0740694	-0.110971	-0.0965288	-0.0629368	-0.0750926	0.0909026	0.0888438	0.0605402	0.0846532	0.0956133	0.0785188	0.129689	-0.0657313	-0.0519086	-0.0700257
Q14651	PLS1	Plastin-1 OS=Homo sapiens GN=PLS1 PE=1 SV=2	48.3307	28	208	23	11	0	629	70.2	2.31475e-09	0.236011	-0.111136	-0.169442	7.21759e-09	2.04652e-08	0.169473	-0.347147	-0.405453	-0.0583063	0	1	0	0.239522	0.229968	0.201626	0.276987	0.263605	0.20436	-0.108532	-0.0491274	-0.0530854	-0.076481	-0.120612	-0.200837	-0.169275	-0.169703	-0.157235	-0.181387
Q14684	RRP1B	Ribosomal RNA processing protein 1 homolog B OS=Homo sapiens GN=RRP1B PE=1 SV=3	52.5066	38	293	38	2	0	758	84.4	2.32636e-09	-0.181624	0.127115	-0.140623	2.9639e-09	0.280161	2.28234e-07	0.308739	0.0410015	-0.267738	0	0	0	-0.20077	-0.160822	-0.217307	-0.165532	-0.159949	-0.185364	0.127921	0.10727	0.1133	0.228417	0.0842194	0.106328	0.122351	-0.149967	-0.1139	-0.158001
P00367	GLUD1	Glutamate dehydrogenase 1, mitochondrial OS=Homo sapiens GN=GLUD1 PE=1 SV=2	57.7061	31	384	13	2	27	558	61.4	2.34067e-09	-0.194891	0.117211	-0.0936917	1.7953e-09	0.00351829	2.49599e-06	0.312102	0.101199	-0.210903	0	0	0	-0.220284	-0.192255	-0.212106	-0.179498	-0.171036	-0.194165	0.133546	0.0896919	0.1332	0.210843	0.0739128	0.0874176	0.0918677	-0.0962288	-0.0718536	-0.112993
Q9H165	BCL11A	B-cell lymphoma/leukemia 11A OS=Homo sapiens GN=BCL11A PE=1 SV=2	12.5749	7	18	4	0	2	835	91.1	2.35414e-09	0.367439	-0.46574	0.189391	2.33937e-09	0.051349	5.70309e-07	-0.833179	-0.178048	0.655131	1	0	1	0.440951	0.311025	0.280772	0.430183	0.42934	0.312362	-0.394864	-0.641175	-0.326759	-0.338584	-0.515276	-0.452207	-0.591312	0.176441	0.232677	0.159057
O43303	CCP110	Centriolar coiled-coil protein of 110 kDa OS=Homo sapiens GN=CCP110 PE=1 SV=3	38.2411	29	81	28	0	0	1012	113.4	2.35906e-09	0.106623	-0.10077	0.0593875	2.25609e-09	0.036935	6.78644e-07	-0.207393	-0.0472358	0.160157	0	0	0	0.0896735	0.103515	0.116381	0.0977905	0.0963587	0.136022	-0.0833652	-0.0952434	-0.0742622	-0.0830977	-0.10051	-0.166676	-0.102234	0.0668694	0.0641806	0.0471126
Q15363	TMED2	Transmembrane emp24 domain-containing protein 2 OS=Homo sapiens GN=TMED2 PE=1 SV=1	39.801	9	163	9	0	0	201	22.7	2.42445e-09	-0.130699	0.117197	-0.0505353	1.8613e-09	0.00367098	2.54345e-06	0.247897	0.0801639	-0.167733	0	0	0	-0.16507	-0.10038	-0.143829	-0.0976036	-0.153848	-0.123464	0.128439	0.109706	0.0599829	0.110858	0.133921	0.137763	0.139712	-0.073554	-0.0582178	-0.019834
Q9BZF3	OSBPL6	Oxysterol-binding protein-related protein 6 OS=Homo sapiens GN=OSBPL6 PE=1 SV=1	55.1392	43	166	2	0	51	934	106.2	2.42771e-09	-0.0883348	0.0874693	-0.0564936	2.65063e-09	0.108003	4.00949e-07	0.175804	0.0318412	-0.143963	0	0	0	-0.113572	-0.0823019	-0.115171	-0.0672335	-0.0798515	-0.0718794	0.0660261	0.112068	0.0561214	0.100091	0.0984099	0.0844671	0.0951015	-0.0335122	-0.0622922	-0.0736764
P30046	DDT	D-dopachrome decarboxylase OS=Homo sapiens GN=DDT PE=1 SV=3	57.6271	6	45	6	0	0	118	12.7	2.53485e-09	0.242335	-0.141334	0.0135068	1.60397e-09	1.15622e-05	0.000435394	-0.383669	-0.228828	0.154841	0	0	0	0.296278	0.208599	0.287207	0.226646	0.195712	0.239565	-0.122379	-0.118606	-0.0586341	-0.162113	-0.143421	-0.162794	-0.221389	-2.76535e-05	0.0157909	0.0247572
Q15833	STXBP2	Syntaxin-binding protein 2 OS=Homo sapiens GN=STXBP2 PE=1 SV=2	48.9039	25	79	24	0	0	593	66.4	2.57463e-09	-0.826674	0.0257151	0.422857	3.46837e-08	6.00591e-09	0.00109976	0.852389	1.24953	0.397142	1	1	1	-0.866413	-0.818937	-0.901405	-0.765855	-0.776936	-0.830498	-0.0733232	-0.0636452	-0.231942	-0.0442967	0.221842	0.214466	0.156906	0.418659	0.431429	0.418483
Q9BTY2	FUCA2	Plasma alpha-L-fucosidase OS=Homo sapiens GN=FUCA2 PE=1 SV=2	37.4732	19	69	19	11	0	467	54	2.6519e-09	-0.231551	0.118621	-0.0651272	1.68104e-09	0.000122753	3.57423e-05	0.350173	0.166424	-0.183748	0	0	0	-0.27324	-0.234741	-0.205661	-0.200636	-0.211538	-0.263493	0.125337	0.0949635	0.0417952	0.206419	0.102986	0.117297	0.141551	-0.0567492	-0.0768458	-0.0617867
Q13045	FLII	Protein flightless-1 homolog OS=Homo sapiens GN=FLII PE=1 SV=2	51.773	56	330	32	0	33	1269	144.7	2.67164e-09	0.059745	-0.0799955	0.0669381	6.98593e-09	0.833561	5.27033e-08	-0.13974	0.0071932	0.146934	0	0	0	0.0567659	0.0616406	0.0575489	0.0627189	0.0640774	0.0557181	-0.0828043	-0.105952	-0.0929242	-0.0982724	-0.0472506	-0.043503	-0.0892619	0.0691164	0.0541578	0.0775403
Q9BY77	POLDIP3	Polymerase delta-interacting protein 3 OS=Homo sapiens GN=POLDIP3 PE=1 SV=2	69.3587	31	280	4	0	41	421	46.1	2.73586e-09	-0.115754	0.0797632	-0.0497827	2.04218e-09	0.00281791	3.4974e-06	0.195518	0.0659717	-0.129546	0	0	0	-0.131646	-0.119248	-0.150302	-0.0901186	-0.0751448	-0.128066	0.0950001	0.0838945	0.063393	0.113553	0.0697773	0.0674514	0.0652733	-0.0562886	-0.033518	-0.0595415
O14777	NDC80	Kinetochore protein NDC80 homolog OS=Homo sapiens GN=NDC80 PE=1 SV=1	73.8318	46	211	46	34	0	642	73.9	2.74195e-09	0.111782	-0.145563	0.0687571	3.12244e-09	0.149861	3.84709e-07	-0.257345	-0.0430248	0.21432	0	0	0	0.105111	0.128511	0.106001	0.135807	0.0984142	0.0968461	-0.179761	-0.162745	-0.136111	-0.209317	-0.114104	-0.125893	-0.0910116	0.0480029	0.0786944	0.0795738
Q86VQ1	GLCCI1	Glucocorticoid-induced transcript 1 protein OS=Homo sapiens GN=GLCCI1 PE=1 SV=1	22.3035	10	24	8	2	0	547	58	2.76656e-09	-0.416454	0.231532	-0.253506	2.48402e-09	0.0225217	1.06162e-06	0.647986	0.162948	-0.485038	1	0	1	-0.482666	-0.448094	-0.437494	-0.387368	-0.401326	-0.341779	0.2085	0.176238	0.102476	0.195049	0.215338	0.40158	0.321544	-0.250823	-0.225873	-0.283823
Q7L5Y1	ENOSF1	Mitochondrial enolase superfamily member 1 OS=Homo sapiens GN=ENOSF1 PE=1 SV=1	52.1445	21	72	21	0	0	443	49.8	2.77858e-09	0.121133	-0.114859	0.0640377	2.55577e-09	0.02831	9.43439e-07	-0.235992	-0.0570948	0.178897	0	0	0	0.117442	0.111339	0.0658979	0.134526	0.141545	0.156045	-0.127483	-0.0985996	-0.111522	-0.128487	-0.108552	-0.159818	-0.0695521	0.0603926	0.0665787	0.0651419
Q9Y570	PPME1	Protein phosphatase methylesterase 1 OS=Homo sapiens GN=PPME1 PE=1 SV=3	59.3264	23	216	23	0	0	386	42.3	2.81684e-09	0.0955521	-0.0836879	0.0682882	3.36511e-09	0.203456	3.3501e-07	-0.17924	-0.0272639	0.151976	0	0	0	0.137143	0.0924149	0.0750542	0.0917547	0.0833909	0.0935551	-0.0562559	-0.064232	-0.0691348	-0.0837533	-0.0945525	-0.0932835	-0.124604	0.0605171	0.0615387	0.0828087
Q99856	ARID3A	AT-rich interactive domain-containing protein 3A OS=Homo sapiens GN=ARID3A PE=1 SV=2	48.5666	21	118	19	10	0	593	62.9	2.81853e-09	-0.159435	0.142761	-0.194838	9.9059e-09	0.429915	3.56574e-08	0.302196	-0.0354023	-0.337598	0	0	0	-0.182782	-0.170622	-0.166563	-0.129052	-0.139557	-0.168036	0.165248	0.151898	0.115461	0.0433561	0.171741	0.135432	0.216192	-0.204208	-0.182553	-0.197752
Q96BW1	UPRT	Uracil phosphoribosyltransferase homolog OS=Homo sapiens GN=UPRT PE=2 SV=1	35.2751	8	21	8	0	0	309	33.8	2.86112e-09	0.120291	-0.177189	0.145246	8.63993e-09	0.633307	4.49531e-08	-0.29748	0.0249544	0.322435	0	0	0	0.112733	0.0931247	0.16428	0.109849	0.109567	0.132193	-0.173685	-0.19768	-0.223533	-0.108184	-0.191592	-0.201686	-0.143962	0.202026	0.0882092	0.145502
O14975	SLC27A2	Very long-chain acyl-CoA synthetase OS=Homo sapiens GN=SLC27A2 PE=1 SV=2	58.7097	31	158	31	2	0	620	70.3	2.93888e-09	0.15951	-0.172035	0.128918	4.31187e-09	0.54308	1.90576e-07	-0.331545	-0.0305919	0.300953	0	0	0	0.137054	0.185766	0.148887	0.156495	0.159385	0.169474	-0.178897	-0.150857	-0.125513	-0.0860449	-0.207892	-0.252956	-0.202085	0.150391	0.11624	0.120124
O14727-4	APAF1	Isoform 4 of Apoptotic protease-activating factor 1 OS=Homo sapiens GN=APAF1	46.0581	46	142	45	0	1	1205	137	2.96921e-09	0.151273	-0.156413	0.0985725	3.33768e-09	0.140795	4.33777e-07	-0.307686	-0.0527006	0.254985	0	0	0	0.173283	0.124003	0.154526	0.162494	0.147536	0.145795	-0.138349	-0.11558	-0.127311	-0.267012	-0.13203	-0.166635	-0.147971	0.0982632	0.0953703	0.102084
Q9BXW9-1	FANCD2	Isoform 1 of Fanconi anemia group D2 protein OS=Homo sapiens GN=FANCD2	44.4596	54	208	54	0	0	1471	166.4	2.97762e-09	0.0596404	-0.0854838	0.0660196	7.53724e-09	0.876624	6.18243e-08	-0.145124	0.00637924	0.151503	0	0	0	0.0449754	0.0621859	0.017336	0.0591582	0.0949767	0.0792103	-0.101964	-0.080727	-0.0897303	-0.0659062	-0.0895181	-0.0824559	-0.0880845	0.066356	0.0634162	0.0682867
Q14690	PDCD11	Protein RRP5 homolog OS=Homo sapiens GN=PDCD11 PE=1 SV=3	53.9818	95	679	95	95	0	1871	208.6	3.02838e-09	-0.128396	0.0960702	-0.0600545	2.40636e-09	0.00660061	2.3647e-06	0.224466	0.068341	-0.156125	0	0	0	-0.139508	-0.108837	-0.171047	-0.123449	-0.108611	-0.118922	0.124072	0.112663	0.0916835	0.0928858	0.0401838	0.084057	0.126946	-0.0550928	-0.0461062	-0.0789646
P01111	NRAS	GTPase NRas OS=Homo sapiens GN=NRAS PE=1 SV=1	75.1323	12	108	4	4	13	189	21.2	3.08798e-09	-0.159331	0.127905	-0.0805599	2.62209e-09	0.0137764	1.58524e-06	0.287235	0.0787707	-0.208464	0	0	0	-0.194181	-0.118318	-0.178445	-0.146996	-0.156996	-0.161047	0.0872238	0.0891696	0.0996365	0.201784	0.128673	0.124348	0.164496	-0.0766347	-0.0710057	-0.0940391
Q8NFY9	KBTBD8	Kelch repeat and BTB domain-containing protein 8 OS=Homo sapiens GN=KBTBD8 PE=2 SV=2	41.4309	20	50	20	8	0	601	68.8	3.09366e-09	-0.180518	0.175115	-0.108007	3.15439e-09	0.0709198	6.54499e-07	0.355633	0.0725112	-0.283122	0	0	0	-0.206965	-0.196207	-0.221681	-0.18836	-0.154623	-0.115274	0.206169	0.254758	0.110289	0.136071	0.147021	0.172178	0.199318	-0.0886734	-0.106273	-0.129075
Q9Y6X5	ENPP4	Bis(5'-adenosyl)-triphosphatase ENPP4 OS=Homo sapiens GN=ENPP4 PE=1 SV=3	10.1545	4	7	4	4	0	453	51.6	3.09687e-09	0.297472	-0.336191	0.129254	2.68458e-09	0.0170107	1.41407e-06	-0.633663	-0.168218	0.465445	1	0	1	0.319621	0.222056	0.242503	0.366975	0.323906	0.309769	-0.290153	-0.432412	-0.22088	-0.308128	-0.41834	-0.432935	-0.250491	0.109742	0.195379	0.082641
A0AVT1	UBA6	Ubiquitin-like modifier-activating enzyme 6 OS=Homo sapiens GN=UBA6 PE=1 SV=1	67.1103	58	366	58	3	0	1052	117.9	3.13705e-09	0.0959896	-0.111633	0.0745034	4.42147e-09	0.469651	2.25876e-07	-0.207623	-0.0214862	0.186136	0	0	0	0.0809659	0.0718877	0.0811309	0.112288	0.112798	0.116868	-0.0768263	-0.0798781	-0.138758	-0.115931	-0.0939499	-0.110533	-0.165555	0.0719632	0.0730524	0.0784945
Q96D96	HVCN1	Voltage-gated hydrogen channel 1 OS=Homo sapiens GN=HVCN1 PE=1 SV=1	24.1758	6	11	6	0	0	273	31.7	3.17654e-09	-0.27169	0.139877	-0.0804151	2.01999e-09	0.000176062	3.4054e-05	0.411567	0.191275	-0.220292	0	0	0	-0.330539	-0.221022	-0.287292	-0.272197	-0.281553	-0.237538	0.171239	0.140783	0.0565366	0.218119	0.100318	0.145383	0.146761	-0.0444117	-0.057785	-0.139049
Q8NI22	MCFD2	Multiple coagulation factor deficiency protein 2 OS=Homo sapiens GN=MCFD2 PE=1 SV=1	68.4932	4	65	4	0	0	146	16.4	3.18478e-09	-0.215336	0.13867	-0.0800379	2.20787e-09	0.00108803	8.07709e-06	0.354006	0.135298	-0.218708	0	0	0	-0.270895	-0.194015	-0.252458	-0.20264	-0.212202	-0.159807	0.144069	0.195186	0.0897436	0.190058	0.140784	0.137464	0.0733833	-0.0775331	-0.0629925	-0.0995882
P38646	HSPA9	Stress-70 protein, mitochondrial OS=Homo sapiens GN=HSPA9 PE=1 SV=2	76.2887	57	2381	56	27	2	679	73.6	3.20204e-09	-0.16207	0.14279	-0.13924	5.0095e-09	0.670728	1.75763e-07	0.304861	0.0228308	-0.28203	0	0	0	-0.121991	-0.163681	-0.164795	-0.187211	-0.154571	-0.180175	0.107694	0.086577	0.112503	0.215133	0.117994	0.164016	0.195615	-0.137167	-0.117133	-0.163419
P37837	TALDO1	Transaldolase OS=Homo sapiens GN=TALDO1 PE=1 SV=2	51.9288	21	413	21	6	0	337	37.5	3.3421e-09	0.0840765	-0.158651	0.140725	2.0458e-08	0.0760139	2.1915e-08	-0.242728	0.056649	0.299377	0	0	0	0.101833	0.0870008	0.0948734	0.111643	0.0638759	0.0452335	-0.10971	-0.134582	-0.174395	-0.143564	-0.145575	-0.15701	-0.245725	0.133349	0.141892	0.146935
Q6UXH1-5	CRELD2	Isoform 5 of Cysteine-rich with EGF-like domain protein 2 OS=Homo sapiens GN=CRELD2	31.0945	10	49	10	1	0	402	43.5	3.36742e-09	-0.210832	0.0525622	0.0677936	6.54655e-09	6.17027e-08	0.784605	0.263394	0.278625	0.0152314	0	0	0	-0.235865	-0.233661	-0.235886	-0.200747	-0.168457	-0.190376	0.0332054	0.0446986	-0.021767	0.0699415	0.08727	0.082516	0.0720707	0.0450696	0.0949881	0.063323
F5GZS6	SLC3A2	4F2 cell-surface antigen heavy chain OS=Homo sapiens GN=SLC3A2 PE=1 SV=1	59.5993	30	419	2	0	40	599	64.8	3.36868e-09	-0.115372	0.162209	-0.216643	3.98659e-08	0.00910776	1.24026e-08	0.277581	-0.101271	-0.378852	0	0	1	-0.127625	-0.098562	-0.150372	-0.104126	-0.0999341	-0.111614	0.122706	0.132127	0.195145	0.263648	0.102798	0.137474	0.181561	-0.201631	-0.211662	-0.236636
P14317	HCLS1	Hematopoietic lineage cell-specific protein OS=Homo sapiens GN=HCLS1 PE=1 SV=3	52.0576	24	121	24	3	0	486	54	3.3707e-09	-0.447923	0.200265	-0.044917	2.15653e-09	9.61294e-06	0.000950607	0.648188	0.403006	-0.245182	1	1	0	-0.481967	-0.42034	-0.495533	-0.426545	-0.417228	-0.445926	0.274322	0.21774	0.186671	-0.0106914	0.249544	0.307102	0.177166	-0.0662859	-0.0225738	-0.0458914
Q8WW59	SPRYD4	SPRY domain-containing protein 4 OS=Homo sapiens GN=SPRYD4 PE=1 SV=2	73.43	17	47	17	17	0	207	23.1	3.40731e-09	-0.183076	0.127135	-0.141294	4.31179e-09	0.290677	3.3386e-07	0.310211	0.0417826	-0.268428	0	0	0	-0.203794	-0.201961	-0.176287	-0.198228	-0.160043	-0.158144	0.129194	0.139387	0.0541175	0.221144	0.11206	0.139113	0.0949256	-0.143117	-0.127138	-0.153626
Q9BX67	JAM3	Junctional adhesion molecule C OS=Homo sapiens GN=JAM3 PE=1 SV=1	40.3226	17	107	17	2	0	310	35	3.44424e-09	-0.154874	0.121077	-0.118966	4.42636e-09	0.314762	3.21835e-07	0.275951	0.0359084	-0.240042	0	0	0	-0.154874	-0.197242	-0.152492	-0.0936119	-0.144053	-0.186972	0.153289	0.134764	0.161054	0.104993	0.0902192	0.0676387	0.135578	-0.11617	-0.139478	-0.101248
Q86WW8	COA5	Cytochrome c oxidase assembly factor 5 OS=Homo sapiens GN=COA5 PE=1 SV=1	40.5405	3	8	3	0	0	74	8.4	3.44538e-09	0.22062	-0.239234	0.130456	3.59338e-09	0.0872992	6.6036e-07	-0.459854	-0.0901633	0.369691	1	0	1	0.205169	0.282963	0.200314	0.192473	0.220185	0.222614	-0.316295	-0.306173	-0.285171	-0.188653	-0.279792	-0.139438	-0.159118	0.140387	0.140605	0.110378
Q9H0V9-2	LMAN2L	Isoform 2 of VIP36-like protein OS=Homo sapiens GN=LMAN2L	40.1114	11	31	11	0	0	359	41	3.57979e-09	-0.156921	0.142971	0.0327266	2.30869e-09	8.50094e-06	0.0012661	0.299892	0.189647	-0.110245	0	0	0	-0.201488	-0.112841	-0.190883	-0.120133	-0.179132	-0.137046	0.133124	0.127677	0.109462	0.211104	0.125053	0.118296	0.176082	0.033151	0.0345652	0.0304636
Q6W2J9	BCOR	BCL-6 corepressor OS=Homo sapiens GN=BCOR PE=1 SV=1	40.5128	52	165	50	1	0	1755	192.1	3.58759e-09	0.0487872	-0.083095	0.0656645	1.32535e-08	0.385809	4.21989e-08	-0.131882	0.0168774	0.14876	0	0	0	0.0376333	0.0576186	0.0371616	0.0487172	0.0559702	0.0556222	-0.0808011	-0.0822924	-0.0549038	-0.0696404	-0.0855282	-0.130506	-0.0779932	0.0755858	0.0684668	0.0529409
Q6UWE0	LRSAM1	E3 ubiquitin-protein ligase LRSAM1 OS=Homo sapiens GN=LRSAM1 PE=1 SV=1	61.1342	35	122	35	0	0	723	83.5	3.63055e-09	0.0942297	-0.100286	0.0855086	6.37438e-09	0.868805	1.51572e-07	-0.194516	-0.00872109	0.185795	0	0	0	0.0843955	0.0949006	0.0703201	0.0965707	0.106785	0.112407	-0.122798	-0.05319	-0.101904	-0.122514	-0.101066	-0.131743	-0.0687875	0.101788	0.0561523	0.0985856
O95861	BPNT1	3'(2'),5'-bisphosphate nucleotidase 1 OS=Homo sapiens GN=BPNT1 PE=1 SV=1	79.8701	21	125	21	0	0	308	33.4	3.87735e-09	0.34341	-0.297559	0.103272	2.71338e-09	0.00147609	8.49762e-06	-0.64097	-0.240138	0.400831	1	0	1	0.316596	0.367023	0.389817	0.352827	0.356459	0.277741	-0.269095	-0.207375	-0.233723	-0.178963	-0.33463	-0.439989	-0.419142	0.128012	0.0863852	0.0954186
A0A087X1N8	SERPINB6	Serpin B6 OS=Homo sapiens GN=SERPINB6 PE=1 SV=1	66.0759	21	381	21	0	0	395	44.8	3.9071e-09	0.106661	-0.152602	0.179926	3.04509e-08	0.0360952	2.02474e-08	-0.259262	0.0732653	0.332527	0	0	0	0.0835352	0.113675	0.0592836	0.109796	0.126858	0.146816	-0.146522	-0.111908	-0.201752	-0.160767	-0.111902	-0.117331	-0.218029	0.152265	0.203628	0.183884
P45880-1	VDAC2	Isoform 1 of Voltage-dependent anion-selective channel protein 2 OS=Homo sapiens GN=VDAC2	66.0194	17	1379	7	0	16	309	33.4	3.93582e-09	-0.18936	0.157596	-0.119856	4.05536e-09	0.0832358	7.85411e-07	0.346956	0.0695037	-0.277452	0	0	0	-0.191859	-0.206793	-0.155227	-0.204242	-0.178624	-0.199415	0.111942	0.119218	0.122688	0.276109	0.158465	0.135672	0.179076	-0.125561	-0.0952967	-0.138712
P56524	HDAC4	Histone deacetylase 4 OS=Homo sapiens GN=HDAC4 PE=1 SV=3	26.1993	19	37	18	1	0	1084	119	3.97487e-09	0.205665	-0.155771	0.141115	4.37043e-09	0.131488	6.18447e-07	-0.361436	-0.0645498	0.296886	0	0	0	0.170738	0.200538	0.204559	0.216677	0.211342	0.230136	-0.0934439	-0.0828524	-0.13764	-0.224577	-0.204889	-0.203114	-0.143884	0.185211	0.0975924	0.140542
A0A087WVC6	PTPRJ	Protein-tyrosine-phosphatase OS=Homo sapiens GN=PTPRJ PE=1 SV=1	17.7347	20	42	20	0	0	1342	146.5	4.05668e-09	0.113615	-0.232683	0.281714	8.85796e-08	0.0018224	9.91847e-09	-0.346298	0.168099	0.514397	0	0	1	0.0843608	0.111369	0.102425	0.146771	0.104517	0.132246	-0.295901	-0.292939	-0.288877	-0.287829	-0.151196	-0.177841	-0.1342	0.315017	0.259465	0.270659
Q9Y4C8	RBM19	Probable RNA-binding protein 19 OS=Homo sapiens GN=RBM19 PE=1 SV=3	52.0833	45	164	45	41	0	960	107.3	4.07695e-09	-0.133028	0.0993835	-0.0603002	3.1795e-09	0.00638511	3.48957e-06	0.232411	0.0727277	-0.159684	0	0	0	-0.111298	-0.125138	-0.200435	-0.13453	-0.112568	-0.114198	0.113009	0.136588	0.0853147	0.0747832	0.0815147	0.078882	0.125593	-0.0513439	-0.0631268	-0.0664299
Q15438	CYTH1	Cytohesin-1 OS=Homo sapiens GN=CYTH1 PE=1 SV=1	28.1407	9	17	6	0	2	398	46.4	4.13059e-09	0.173078	-0.239558	0.180695	9.38535e-09	0.977638	1.02577e-07	-0.412635	0.00761741	0.420253	0	0	1	0.157618	0.168839	0.128515	0.204434	0.206642	0.172418	-0.251103	-0.261253	-0.201013	-0.0958439	-0.296393	-0.316802	-0.254497	0.170809	0.190485	0.180791
Q9BW85	CCDC94	Coiled-coil domain-containing protein 94 OS=Homo sapiens GN=CCDC94 PE=1 SV=1	58.2043	16	143	15	9	0	323	37.1	4.22367e-09	-0.115527	0.125209	-0.101041	6.99523e-09	0.780846	2.00361e-07	0.240735	0.0144854	-0.22625	0	0	0	-0.116531	-0.13449	-0.0816288	-0.120737	-0.104418	-0.135356	0.148974	0.141746	0.0918751	0.196257	0.10541	0.113941	0.0782563	-0.0990288	-0.110287	-0.0938082
Q9BU40-4	CHRDL1	Isoform 4 of Chordin-like protein 1 OS=Homo sapiens GN=CHRDL1	7.20524	3	6	3	0	0	458	52.2	4.23547e-09	0.360579	-0.303098	0.0316756	2.64212e-09	0.000117197	7.74846e-05	-0.663676	-0.328903	0.334773	1	1	0	0.325165	0.3484	0.334807	0.343352	0.364641	0.447107	-0.389947	-0.228059	-0.218424	-0.212059	-0.324299	-0.490075	-0.258822	0.0622645	0.0236513	0.00911105
Q96T51	RUFY1	RUN and FYVE domain-containing protein 1 OS=Homo sapiens GN=RUFY1 PE=1 SV=2	60.7345	47	192	45	0	2	708	79.8	4.25451e-09	0.110209	-0.128732	0.0805526	5.5869e-09	0.359172	3.69658e-07	-0.238941	-0.0296561	0.209285	0	0	0	0.0981319	0.102004	0.118033	0.115789	0.110137	0.117156	-0.109916	-0.07798	-0.0984777	-0.112251	-0.134863	-0.170409	-0.197229	0.0857468	0.0648443	0.0910666
Q8TEP8-3	CEP192	Isoform 3 of Centrosomal protein of 192 kDa OS=Homo sapiens GN=CEP192	35.1991	70	187	70	0	0	2537	278.9	4.26131e-09	0.0902501	-0.0916616	0.058318	4.7313e-09	0.142533	6.37899e-07	-0.181912	-0.031932	0.14998	0	0	0	0.0903858	0.0791611	0.0952705	0.0766556	0.0826542	0.117373	-0.0806109	-0.050663	-0.0879101	-0.111108	-0.096685	-0.130494	-0.0841591	0.0869575	0.0551111	0.0328855
Q86TP1	PRUNE	Protein prune homolog OS=Homo sapiens GN=PRUNE PE=1 SV=2	33.5541	13	52	13	3	0	453	50.2	4.28523e-09	0.227921	-0.146557	0.0185618	2.65559e-09	3.52031e-05	0.000283112	-0.374479	-0.20936	0.165119	0	0	0	0.199777	0.221626	0.231109	0.218178	0.205595	0.291244	-0.139119	-0.0995547	-0.11625	-0.0968181	-0.127208	-0.244164	-0.202788	0.030537	0.00084398	0.0243044
Q53EL6	PDCD4	Programmed cell death protein 4 OS=Homo sapiens GN=PDCD4 PE=1 SV=2	61.194	25	179	25	0	0	469	51.7	4.36977e-09	0.245744	-0.122847	-0.0822333	4.68427e-09	3.46361e-07	0.413936	-0.36859	-0.327977	0.0406132	0	1	0	0.214846	0.252628	0.273458	0.302007	0.213767	0.217756	-0.129619	-0.115595	-0.0438332	-0.0561173	-0.157188	-0.156616	-0.200956	-0.0830061	-0.0925214	-0.0711725
Q96QD9	FYTTD1	UAP56-interacting factor OS=Homo sapiens GN=FYTTD1 PE=1 SV=3	51.2579	16	86	16	0	0	318	35.8	4.51127e-09	0.0754885	-0.124479	0.123998	2.8786e-08	0.0726418	2.81623e-08	-0.199967	0.0485091	0.248476	0	0	0	0.0573351	0.0607225	0.0422307	0.0933109	0.11361	0.0857216	-0.12298	-0.121007	-0.142347	-0.182021	-0.11652	-0.110546	-0.0759311	0.106796	0.140235	0.124961
Q9GZS1-2	POLR1E	Isoform 2 of DNA-directed RNA polymerase I subunit RPA49 OS=Homo sapiens GN=POLR1E	63.0072	24	155	24	2	0	419	47.2	4.58823e-09	-0.137069	0.0830356	-0.0891065	4.50013e-09	0.0599942	1.11498e-06	0.220105	0.0479629	-0.172142	0	0	0	-0.141464	-0.125288	-0.15723	-0.146271	-0.115619	-0.136544	0.088101	0.0948668	0.0469896	0.142748	0.0369815	0.0664964	0.105065	-0.0874587	-0.0786775	-0.101183
E7ETU7	MRPL3	39S ribosomal protein L3, mitochondrial OS=Homo sapiens GN=MRPL3 PE=1 SV=1	49.6	16	54	16	0	0	375	41.6	4.61921e-09	0.193392	-0.0787457	-0.0487676	4.95378e-09	3.64917e-07	0.417174	-0.272138	-0.242159	0.0299781	0	0	0	0.243534	0.174142	0.163293	0.157288	0.200526	0.221569	-0.114854	-0.111193	-0.0436316	-0.0505612	-0.0856291	-0.0915606	-0.0537902	-0.0534251	-0.00635418	-0.0865234
P15954	COX7C	Cytochrome c oxidase subunit 7C, mitochondrial OS=Homo sapiens GN=COX7C PE=1 SV=1	28.5714	2	33	2	0	0	63	7.2	4.64382e-09	0.276789	-0.176488	-0.0271887	3.11267e-09	5.84953e-06	0.00364962	-0.453277	-0.303978	0.149299	1	1	0	0.20213	0.278749	0.309705	0.291809	0.29575	0.282594	-0.240503	-0.222653	-0.0525447	-0.166357	-0.123376	-0.237513	-0.192471	-0.0143406	-0.0107378	-0.0564877
Q13085-4	ACACA	Isoform 4 of Acetyl-CoA carboxylase 1 OS=Homo sapiens GN=ACACA	65.3798	140	1136	124	0	23	2383	269.8	4.81445e-09	-0.105309	0.0740561	-0.0343958	3.27208e-09	0.00107134	1.43514e-05	0.179365	0.0709136	-0.108452	0	0	0	-0.129251	-0.103125	-0.119582	-0.0906764	-0.0946493	-0.0945728	0.0842568	0.0785689	0.0209975	0.065589	0.090521	0.107833	0.0706261	-0.035645	-0.0435014	-0.0240411
Q9Y6N7-2	ROBO1	Isoform 2 of Roundabout homolog 1 OS=Homo sapiens GN=ROBO1	36.7372	48	189	46	0	2	1655	181.2	4.87268e-09	-0.295705	0.219635	-0.16342	4.31642e-09	0.0258167	1.90966e-06	0.51534	0.132285	-0.383055	1	0	1	-0.208247	-0.344818	-0.405304	-0.232346	-0.271414	-0.312102	0.192438	0.139471	0.307057	0.236175	0.161588	0.226595	0.274121	-0.151294	-0.138818	-0.200147
Q9GZX9	TWSG1	Twisted gastrulation protein homolog 1 OS=Homo sapiens GN=TWSG1 PE=2 SV=1	35.426	6	35	6	3	0	223	25	4.8775e-09	-0.314922	0.14392	-0.0663254	3.01615e-09	5.38645e-05	0.000217825	0.458843	0.248597	-0.210246	1	0	0	-0.365515	-0.300508	-0.334288	-0.31738	-0.269225	-0.302619	0.145715	0.13241	0.0683462	0.0811174	0.101883	0.212458	0.265514	-0.0723254	-0.0377571	-0.0888937
Q9UBV7	B4GALT7	Beta-1,4-galactosyltransferase 7 OS=Homo sapiens GN=B4GALT7 PE=1 SV=1	25.3823	6	10	6	4	0	327	37.4	4.90976e-09	-0.432034	0.282694	-0.385772	7.99939e-09	0.756242	2.40855e-07	0.714728	0.0462621	-0.668466	1	0	1	-0.452809	-0.44378	-0.452939	-0.33897	-0.435448	-0.468258	0.226561	0.149052	0.0910177	0.395755	0.33822	0.394012	0.384238	-0.383168	-0.384774	-0.389374
O95182	NDUFA7	NADH dehydrogenase [ubiquinone] 1 alpha subcomplex subunit 7 OS=Homo sapiens GN=NDUFA7 PE=1 SV=3	61.9469	7	36	7	4	0	113	12.5	5.05235e-09	0.299531	-0.218886	0.0555057	3.19151e-09	0.000222083	5.58213e-05	-0.518417	-0.244025	0.274392	1	0	0	0.275741	0.310595	0.347901	0.300918	0.28056	0.281469	-0.230174	-0.293737	-0.18247	-0.070121	-0.192599	-0.237451	-0.325653	0.093998	0.0125523	0.0599668
O96008	TOMM40	Mitochondrial import receptor subunit TOM40 homolog OS=Homo sapiens GN=TOMM40 PE=1 SV=1	57.0637	15	541	15	4	0	361	37.9	5.06748e-09	-0.226158	0.14591	-0.110893	3.97972e-09	0.00775681	4.05723e-06	0.372067	0.115264	-0.256803	0	0	0	-0.275889	-0.227311	-0.233383	-0.195877	-0.216708	-0.207778	0.0962124	0.117439	0.0625843	0.227201	0.164036	0.139177	0.214718	-0.121281	-0.102863	-0.108536
Q96KA5	CLPTM1L	Cleft lip and palate transmembrane protein 1-like protein OS=Homo sapiens GN=CLPTM1L PE=1 SV=1	35.6877	16	80	16	0	0	538	62.2	5.11505e-09	-0.149867	0.114933	-0.0766121	4.32005e-09	0.0167367	2.59308e-06	0.2648	0.073255	-0.191545	0	0	0	-0.207535	-0.141163	-0.196431	-0.108432	-0.127658	-0.117983	0.0895736	0.0862133	0.0989144	0.110957	0.120876	0.158724	0.13927	-0.0841194	-0.0821611	-0.0635558
D3DVS7	D4S234E	DNA segment on chromosome 4 (Unique) 234 expressed sequence, isoform CRA_a OS=Homo sapiens GN=D4S234E PE=4 SV=1	20.2703	4	9	4	0	0	222	24.7	5.16726e-09	0.352083	-0.829684	0.500066	1.88237e-08	0.42007	6.12644e-08	-1.18177	0.147983	1.32975	1	0	1	0.245231	0.382117	0.402527	0.276637	0.361602	0.444384	-1.13532	-0.831125	-0.673584	-1.0523	-0.535804	-0.940008	-0.639652	0.55711	0.448186	0.494902
P49642	PRIM1	DNA primase small subunit OS=Homo sapiens GN=PRIM1 PE=1 SV=1	49.2857	21	118	21	4	0	420	49.9	5.3656e-09	0.101828	-0.122846	0.0620659	5.94077e-09	0.147443	8.03734e-07	-0.224674	-0.0397616	0.184912	0	0	0	0.11108	0.0878988	0.0809257	0.102913	0.131694	0.0964541	-0.1099	-0.106306	-0.13945	-0.0646101	-0.125518	-0.138034	-0.176107	0.0388196	0.058241	0.0891372
Q9UBM7	DHCR7	7-dehydrocholesterol reductase OS=Homo sapiens GN=DHCR7 PE=1 SV=1	20	10	84	10	1	0	475	54.5	5.45791e-09	-0.224085	0.181288	-0.248727	1.48825e-08	0.79942	9.85615e-08	0.405373	-0.0246417	-0.430015	0	0	1	-0.258369	-0.22464	-0.221995	-0.19551	-0.197327	-0.24667	0.131749	0.124356	0.0888538	0.302599	0.192785	0.184354	0.244318	-0.215064	-0.255932	-0.275185
Q15392	DHCR24	Delta(24)-sterol reductase OS=Homo sapiens GN=DHCR24 PE=1 SV=2	40.6977	20	158	20	0	0	516	60.1	5.53073e-09	-0.353527	0.27438	-0.225876	5.66203e-09	0.0874765	1.11504e-06	0.627907	0.127651	-0.500256	1	0	1	-0.34785	-0.388577	-0.387764	-0.311435	-0.309574	-0.375962	0.167813	0.145935	0.182286	0.296169	0.341299	0.363864	0.423292	-0.22486	-0.237291	-0.215478
O43665-3	RGS10	Isoform 3 of Regulator of G-protein signaling 10 OS=Homo sapiens GN=RGS10	42.5414	6	49	6	0	0	181	21.2	5.58373e-09	0.208005	-0.169534	0.0838779	4.22626e-09	0.00529811	5.81485e-06	-0.37754	-0.124127	0.253412	0	0	0	0.190609	0.216932	0.210884	0.210879	0.212778	0.205949	-0.125873	-0.112315	-0.129147	-0.100592	-0.23297	-0.244597	-0.241247	0.0718811	0.0923917	0.087361
Q9UHY1	NRBP1	Nuclear receptor-binding protein OS=Homo sapiens GN=NRBP1 PE=1 SV=1	49.1589	17	162	17	1	0	535	59.8	5.58414e-09	-0.114235	0.12566	-0.0320958	4.12207e-09	0.00388412	7.11277e-06	0.239894	0.0821387	-0.157755	0	0	0	-0.140714	-0.090692	-0.181343	-0.0786169	-0.0998913	-0.0941494	0.136363	0.161921	0.116065	0.124828	0.113657	0.121996	0.104787	-0.0114747	-0.057828	-0.0269847
O95835	LATS1	Serine/threonine-protein kinase LATS1 OS=Homo sapiens GN=LATS1 PE=1 SV=1	29.115	26	63	22	11	4	1130	126.8	5.6005e-09	0.104642	-0.128965	0.0904472	9.27097e-09	0.785692	2.63538e-07	-0.233607	-0.0141951	0.219412	0	0	0	0.0738117	0.119566	0.100306	0.0781238	0.0948556	0.16119	-0.15533	-0.101556	-0.114912	-0.100601	-0.139574	-0.178608	-0.112172	0.108766	0.0620109	0.100565
Q9BVJ7	DUSP23	Dual specificity protein phosphatase 23 OS=Homo sapiens GN=DUSP23 PE=1 SV=1	50	9	25	9	9	0	150	16.6	5.79536e-09	0.225393	-0.118592	0.0310187	3.59712e-09	4.06161e-05	0.000402105	-0.343985	-0.194375	0.149611	0	0	0	0.269401	0.166984	0.198301	0.215488	0.240916	0.261268	-0.0955464	-0.145109	-0.193701	-0.0644172	-0.101932	-0.103006	-0.126434	0.0693579	-0.0159742	0.0396725
Q9NRG1	PRTFDC1	Phosphoribosyltransferase domain-containing protein 1 OS=Homo sapiens GN=PRTFDC1 PE=1 SV=1	47.1111	10	61	9	1	0	225	25.7	5.84745e-09	0.118542	-0.162865	0.114321	1.15873e-08	0.985662	1.86317e-07	-0.281407	-0.00422129	0.277186	0	0	0	0.10951	0.107611	0.0685184	0.136046	0.166113	0.123455	-0.148065	-0.212232	-0.204839	-0.12329	-0.136454	-0.111468	-0.203708	0.0847954	0.13499	0.123178
Q6UVY6	MOXD1	DBH-like monooxygenase protein 1 OS=Homo sapiens GN=MOXD1 PE=2 SV=1	10.2773	6	11	6	0	0	613	69.6	5.91654e-09	0.112737	-0.34021	0.326169	1.18549e-07	0.00279169	1.51106e-08	-0.452947	0.213432	0.66638	1	0	1	0.0640539	0.173158	0.115946	0.134783	0.0583329	0.130149	-0.473463	-0.375179	-0.394244	-0.248142	-0.31295	-0.354869	-0.222623	0.410821	0.256125	0.311562
P53602	MVD	Diphosphomevalonate decarboxylase OS=Homo sapiens GN=MVD PE=1 SV=1	57.5	20	158	20	4	0	400	43.4	6.05432e-09	-0.162569	0.160222	-0.182115	1.64902e-08	0.803689	1.0913e-07	0.322791	-0.0195453	-0.342337	0	0	1	-0.170003	-0.186686	-0.192057	-0.13473	-0.132206	-0.159734	0.141367	0.183687	0.0848701	0.0920954	0.250108	0.203757	0.165671	-0.184632	-0.171789	-0.189923
P15374	UCHL3	Ubiquitin carboxyl-terminal hydrolase isozyme L3 OS=Homo sapiens GN=UCHL3 PE=1 SV=1	55.6522	11	117	11	1	0	230	26.2	6.06513e-09	0.127152	-0.0922623	0.0164011	3.77307e-09	0.000129827	0.000123248	-0.219414	-0.110751	0.108663	0	0	0	0.116913	0.143726	0.120585	0.129732	0.126949	0.125008	-0.0769993	-0.0608575	-0.084455	-0.0536871	-0.0904106	-0.124113	-0.155313	0.00508271	0.00513485	0.0389857
Q9H0U6	MRPL18	39S ribosomal protein L18, mitochondrial OS=Homo sapiens GN=MRPL18 PE=1 SV=1	72.2222	9	39	9	9	0	180	20.6	6.16138e-09	0.222801	-0.119422	-0.0452078	5.01345e-09	1.59901e-06	0.0570902	-0.342223	-0.268009	0.074214	0	1	0	0.176593	0.221753	0.230974	0.176138	0.255711	0.275639	-0.158997	-0.133402	-0.137925	-0.0546748	-0.120123	-0.175815	-0.0550164	-0.0395301	-0.0269123	-0.069181
Q8TDD1-2	DDX54	Isoform 2 of ATP-dependent RNA helicase DDX54 OS=Homo sapiens GN=DDX54	62.9252	53	249	2	2	64	882	98.6	6.2502e-09	-0.124825	0.089559	-0.0247836	3.96251e-09	0.000283526	6.16391e-05	0.214384	0.100041	-0.114343	0	0	0	-0.146721	-0.119053	-0.162648	-0.13001	-0.106732	-0.0837834	0.0814232	0.0769066	0.0893308	0.111473	0.0572719	0.0746999	0.135807	-0.00764588	-0.0401036	-0.0266012
Q03701	CEBPZ	CCAAT/enhancer-binding protein zeta OS=Homo sapiens GN=CEBPZ PE=1 SV=3	51.8975	44	367	40	2	5	1054	120.9	6.3003e-09	-0.143791	0.125645	-0.113783	8.6733e-09	0.45683	4.71898e-07	0.269437	0.0300083	-0.239429	0	0	0	-0.133081	-0.130182	-0.186982	-0.142437	-0.121236	-0.14883	0.115466	0.101728	0.102652	0.22455	0.0872095	0.120703	0.127209	-0.12123	-0.100615	-0.119504
Q9HAD4	WDR41	WD repeat-containing protein 41 OS=Homo sapiens GN=WDR41 PE=2 SV=3	50.7625	19	79	19	0	0	459	51.7	6.33989e-09	0.13767	-0.0827746	0.03536	4.02673e-09	0.000301776	5.95415e-05	-0.220445	-0.10231	0.118135	0	0	0	0.135323	0.107148	0.183907	0.15543	0.134424	0.10979	-0.0960658	-0.064111	-0.0373896	-0.0984692	-0.0707487	-0.127005	-0.0856334	0.0336684	0.0332203	0.0391914
A0A087WUF6	FGF2	Fibroblast growth factor 2 OS=Homo sapiens GN=FGF2 PE=1 SV=1	16.6667	6	10	6	0	0	288	30.7	6.37871e-09	-0.194154	0.202004	-0.136205	7.79974e-09	0.268293	6.79031e-07	0.396158	0.0579492	-0.338208	0	0	0	-0.219563	-0.143586	-0.237913	-0.201735	-0.186416	-0.175711	0.113621	0.176446	0.143193	0.283255	0.227638	0.28251	0.187362	-0.111792	-0.132702	-0.164119
O75251	NDUFS7	NADH dehydrogenase [ubiquinone] iron-sulfur protein 7, mitochondrial OS=Homo sapiens GN=NDUFS7 PE=1 SV=3	46.0094	9	69	9	1	0	213	23.5	6.46811e-09	0.105862	-0.0619934	-0.00866994	4.40757e-09	6.58376e-06	0.00582582	-0.167855	-0.114532	0.0533234	0	0	0	0.0946009	0.108522	0.0968028	0.114719	0.105419	0.115107	-0.0517206	-0.0794343	-0.0667321	-0.0112694	-0.10599	-0.0637057	-0.0551014	-0.010412	-0.00870118	-0.00689661
P49643	PRIM2	DNA primase large subunit OS=Homo sapiens GN=PRIM2 PE=1 SV=2	65.2259	27	130	27	16	0	509	58.8	6.51627e-09	0.123979	-0.107231	0.0688861	6.06557e-09	0.0440372	1.97436e-06	-0.23121	-0.0550933	0.176117	0	0	0	0.102362	0.148309	0.116023	0.115044	0.122742	0.139397	-0.114809	-0.145104	-0.106815	-0.150196	-0.0997824	-0.091707	-0.0422015	0.0784683	0.0386064	0.0895836
P78347	GTF2I	General transcription factor II-I OS=Homo sapiens GN=GTF2I PE=1 SV=2	65.0301	72	1213	72	0	0	998	112.3	6.55937e-09	-0.123731	0.0275098	0.0242659	9.45913e-09	2.21067e-07	0.968514	0.15124	0.147997	-0.00324391	0	0	0	-0.137318	-0.102953	-0.136276	-0.110771	-0.116284	-0.138782	0.00673885	0.00622912	0.00121883	0.0592782	0.0385075	0.0441902	0.036406	0.0280752	0.0401007	0.00462189
Q9NP92	MRPS30	28S ribosomal protein S30, mitochondrial OS=Homo sapiens GN=MRPS30 PE=1 SV=2	39.8633	14	42	14	6	0	439	50.3	6.5661e-09	0.233922	-0.070075	-0.0645308	9.57884e-09	2.15278e-07	0.977165	-0.303997	-0.298453	0.00554423	0	1	0	0.216408	0.219681	0.236859	0.233167	0.210301	0.287116	-0.126035	-0.0900545	-0.0433541	0.00613978	-0.087918	-0.121749	-0.0275541	-0.0591963	-0.0916054	-0.0427906
Q5R372-5	RABGAP1L	Isoform 5 of Rab GTPase-activating protein 1-like OS=Homo sapiens GN=RABGAP1L	38.0952	12	27	8	0	0	378	43.9	6.59292e-09	0.1715	-0.199902	0.0743003	5.78296e-09	0.0264299	2.68393e-06	-0.371402	-0.0971997	0.274202	0	0	0	0.0994946	0.175342	0.180107	0.203507	0.118199	0.25235	-0.176519	-0.176416	-0.21709	-0.143847	-0.22832	-0.262759	-0.194362	0.102987	0.0347599	0.0851542
A0A0A0MTR7	RNF213	E3 ubiquitin-protein ligase RNF213 OS=Homo sapiens GN=RNF213 PE=1 SV=1	34.3	149	398	147	0	2	5207	591	6.61271e-09	0.1066	-0.105776	0.0456719	5.46739e-09	0.0150567	3.75379e-06	-0.212376	-0.060928	0.151448	0	0	0	0.0788631	0.0951268	0.12027	0.134532	0.103211	0.107597	-0.142182	-0.097839	-0.146695	-0.115017	-0.0620402	-0.113641	-0.0630156	0.0528058	0.0405998	0.0436102
O75394	MRPL33	39S ribosomal protein L33, mitochondrial OS=Homo sapiens GN=MRPL33 PE=1 SV=1	50.7692	3	12	3	3	0	65	7.6	6.93657e-09	0.291096	-0.107212	-0.120508	1.2284e-08	1.49222e-07	0.928644	-0.398308	-0.411604	-0.0132962	0	1	0	0.353282	0.247763	0.235017	0.296142	0.366482	0.247888	-0.157966	-0.104596	-0.0880717	-0.111616	-0.028548	-0.165977	-0.0937095	-0.145867	-0.0553602	-0.160298
O15155	BET1	BET1 homolog OS=Homo sapiens GN=BET1 PE=1 SV=1	56.7797	4	51	4	0	0	118	13.3	6.96502e-09	-0.0943126	0.137224	-0.087295	1.29915e-08	0.943958	2.4972e-07	0.231536	0.00701766	-0.224519	0	0	0	-0.130191	-0.0766482	-0.1451	-0.0962507	-0.084076	-0.0336101	0.109149	0.126321	0.187602	0.126338	0.142175	0.133467	0.135516	-0.0675049	-0.100227	-0.0941529
Q15102	PAFAH1B3	Platelet-activating factor acetylhydrolase IB subunit gamma OS=Homo sapiens GN=PAFAH1B3 PE=1 SV=1	71.8615	14	108	14	0	0	231	25.7	6.97704e-09	0.149161	-0.175102	0.136718	1.26075e-08	0.911525	2.67642e-07	-0.324263	-0.0124433	0.31182	0	0	0	0.159272	0.12841	0.141507	0.165575	0.152492	0.147711	-0.134268	-0.139676	-0.132859	-0.112645	-0.192453	-0.263509	-0.250306	0.154296	0.122384	0.133473
G3V3D1	NPC2	Epididymal secretory protein E1 (Fragment) OS=Homo sapiens GN=NPC2 PE=1 SV=1	37.5566	7	140	7	0	0	221	23.7	7.08963e-09	-0.266694	0.143751	-0.0281442	4.43017e-09	3.61685e-05	0.000653939	0.410444	0.238549	-0.171895	0	0	0	-0.295965	-0.257314	-0.300004	-0.232853	-0.248225	-0.265801	0.0759466	0.0911725	0.0617444	0.188708	0.199723	0.187921	0.201038	-0.0403934	0.0223586	-0.0663979
P49406	MRPL19	39S ribosomal protein L19, mitochondrial OS=Homo sapiens GN=MRPL19 PE=1 SV=2	46.9178	15	66	15	0	0	292	33.5	7.29416e-09	0.187604	-0.0489604	-0.0651761	1.48572e-08	1.20562e-07	0.7429	-0.236564	-0.25278	-0.0162157	0	0	0	0.23616	0.153572	0.173136	0.160176	0.210478	0.192102	-0.114602	-0.0603072	-0.0406827	-0.00952942	-0.0347841	-0.0679804	-0.0148366	-0.0540714	-0.072179	-0.0692778
P49821	NDUFV1	NADH dehydrogenase [ubiquinone] flavoprotein 1, mitochondrial OS=Homo sapiens GN=NDUFV1 PE=1 SV=4	68.319	28	169	28	0	0	464	50.8	7.32419e-09	0.177352	-0.137448	0.0223243	4.5844e-09	0.000191145	0.000113146	-0.314801	-0.155028	0.159773	0	0	0	0.148734	0.197833	0.169397	0.198943	0.146131	0.203076	-0.214176	-0.1577	-0.111692	-0.081693	-0.124587	-0.183145	-0.0891454	0.047683	0.00750911	0.011781
Q99593	TBX5	T-box transcription factor TBX5 OS=Homo sapiens GN=TBX5 PE=1 SV=2	26.834	12	34	12	0	0	518	57.7	7.45126e-09	0.150012	-0.20983	0.115838	1.08875e-08	0.571611	4.72368e-07	-0.359841	-0.0341741	0.325667	0	0	0	0.114312	0.127695	0.107432	0.184479	0.197693	0.168459	-0.231567	-0.201636	-0.232888	-0.0952582	-0.195228	-0.235306	-0.276924	0.135002	0.129662	0.0828489
Q15052	ARHGEF6	Rho guanine nucleotide exchange factor 6 OS=Homo sapiens GN=ARHGEF6 PE=1 SV=2	26.933	19	56	15	0	0	776	87.4	7.63801e-09	0.31942	-0.349789	0.232429	9.87683e-09	0.358971	6.80327e-07	-0.669209	-0.0869909	0.582218	1	0	1	0.23647	0.374505	0.380348	0.312819	0.268484	0.343894	-0.323181	-0.308901	-0.213081	-0.24201	-0.40144	-0.545003	-0.414907	0.275536	0.209901	0.211851
Q9BPX3	NCAPG	Condensin complex subunit 3 OS=Homo sapiens GN=NCAPG PE=1 SV=1	50.6404	50	398	40	25	15	1015	114.3	7.71291e-09	0.124546	-0.116039	0.0705392	7.46368e-09	0.0630671	1.94703e-06	-0.240584	-0.0540063	0.186578	0	0	0	0.121145	0.12558	0.0914031	0.135364	0.143152	0.130629	-0.0831969	-0.0547939	-0.0889237	-0.159332	-0.124997	-0.135454	-0.165574	0.0661044	0.0685557	0.0769577
P49327	FASN	Fatty acid synthase OS=Homo sapiens GN=FASN PE=1 SV=3	70.8483	157	3481	156	155	1	2511	273.3	7.8527e-09	-0.082061	0.11638	-0.105021	2.73126e-08	0.493635	9.75901e-08	0.198441	-0.0229599	-0.221401	0	0	0	-0.0960147	-0.0773871	-0.0729752	-0.0843545	-0.0923034	-0.0693313	0.156318	0.143288	0.12079	0.144437	0.0913797	0.113327	0.045123	-0.101552	-0.125151	-0.0883603
Q9P275-2	USP36	Isoform 2 of Ubiquitin carboxyl-terminal hydrolase 36 OS=Homo sapiens GN=USP36	48.976	49	133	49	0	0	1123	122.8	8.12935e-09	-0.12334	0.098308	-0.0717052	7.69297e-09	0.0538186	2.26422e-06	0.221648	0.0516352	-0.170013	0	0	0	-0.158132	-0.117937	-0.148279	-0.123494	-0.114356	-0.0778447	0.0994901	0.104493	0.140775	0.125477	0.0722246	0.0552879	0.0904082	-0.0481613	-0.0944103	-0.072544
Q9H3U1	UNC45A	Protein unc-45 homolog A OS=Homo sapiens GN=UNC45A PE=1 SV=1	66.7373	58	333	58	0	0	944	103	8.13986e-09	0.0683606	-0.0937444	0.0540197	1.21838e-08	0.618981	4.83176e-07	-0.162105	-0.014341	0.147764	0	0	0	0.0612627	0.0691823	0.0399701	0.0674711	0.0936644	0.0786133	-0.064801	-0.077292	-0.127125	-0.125793	-0.0928285	-0.0808559	-0.0875152	0.0539578	0.0334206	0.0746806
Q01970	PLCB3	1-phosphatidylinositol 4,5-bisphosphate phosphodiesterase beta-3 OS=Homo sapiens GN=PLCB3 PE=1 SV=2	58.1848	56	251	56	3	0	1234	138.7	8.229e-09	0.144793	-0.104182	0.0710954	6.68435e-09	0.0137136	5.17095e-06	-0.248975	-0.0736974	0.175277	0	0	0	0.135871	0.144115	0.148745	0.136024	0.148416	0.155586	-0.124886	-0.0815251	-0.0719859	-0.0631819	-0.0887007	-0.195105	-0.103889	0.0680913	0.0633649	0.0818298
Q9Y3Z3	SAMHD1	Deoxynucleoside triphosphate triphosphohydrolase SAMHD1 OS=Homo sapiens GN=SAMHD1 PE=1 SV=2	65.4952	38	174	38	0	0	626	72.2	8.42244e-09	0.156477	-0.173567	0.159333	1.83961e-08	0.995549	2.19263e-07	-0.330044	0.00285572	0.3329	0	0	0	0.173438	0.150511	0.133601	0.151525	0.16983	0.159958	-0.133572	-0.120783	-0.158963	-0.0927375	-0.214504	-0.221033	-0.273374	0.15369	0.167829	0.15648
Q9UL42	PNMA2	Paraneoplastic antigen Ma2 OS=Homo sapiens GN=PNMA2 PE=1 SV=2	73.9011	23	76	22	22	1	364	41.5	8.47604e-09	0.18628	0.0140944	-0.298159	4.74254e-05	5.2933e-09	7.6171e-07	-0.172186	-0.48444	-0.312254	0	1	0	0.188285	0.197424	0.136774	0.185035	0.21253	0.197634	-0.0482119	-0.00889933	-0.0150254	-0.0345564	0.0350496	0.0484844	0.12182	-0.268	-0.351603	-0.274876
Q08289	CACNB2	Voltage-dependent L-type calcium channel subunit beta-2 OS=Homo sapiens GN=CACNB2 PE=1 SV=3	41.0606	24	56	20	0	5	660	73.5	8.665e-09	-0.222869	0.145327	-0.0571001	5.57975e-09	0.000504657	5.99758e-05	0.368196	0.165769	-0.202427	0	0	0	-0.251223	-0.224616	-0.244747	-0.176515	-0.229246	-0.210868	0.173059	0.198931	0.127504	0.237328	0.0880826	0.0630843	0.129302	-0.039129	-0.0711799	-0.0609914
Q709C8	VPS13C	Vacuolar protein sorting-associated protein 13C OS=Homo sapiens GN=VPS13C PE=1 SV=1	56.4349	165	764	164	0	1	3753	422.1	8.75068e-09	0.0443809	-0.0601167	0.061041	3.71732e-08	0.294931	8.35623e-08	-0.104498	0.0166601	0.121158	0	0	0	0.0353297	0.0317452	0.0297558	0.0687016	0.0570934	0.0436598	-0.0672688	-0.0372538	-0.0726804	-0.0501147	-0.0420136	-0.0758314	-0.0756543	0.0566864	0.0688075	0.0576292
Q15170-2	TCEAL1	Isoform 2 of Transcription elongation factor A protein-like 1 OS=Homo sapiens GN=TCEAL1	33.9623	4	16	4	1	0	159	18.6	8.84263e-09	0.039802	-0.161903	0.19574	7.99107e-07	0.000157321	1.13582e-08	-0.201705	0.155938	0.357644	0	0	0	0.0055095	0.0989295	0.0175836	0.0400467	0.0229891	0.0537538	-0.141288	-0.187556	-0.20717	-0.147698	-0.191482	-0.0811155	-0.177013	0.223588	0.162882	0.200751
O43353	RIPK2	Receptor-interacting serine/threonine-protein kinase 2 OS=Homo sapiens GN=RIPK2 PE=1 SV=2	47.5926	19	55	18	2	1	540	61.2	8.87674e-09	0.154035	-0.1435	0.0404926	6.18026e-09	0.00217368	1.94709e-05	-0.297535	-0.113543	0.183993	0	0	0	0.130263	0.184775	0.165499	0.138803	0.137479	0.167394	-0.146314	-0.119938	-0.172442	-0.234451	-0.0734524	-0.144565	-0.113337	0.0409718	0.0438444	0.0366617
Q9Y467	SALL2	Sal-like protein 2 OS=Homo sapiens GN=SALL2 PE=1 SV=4	32.8699	20	101	2	2	20	1007	105.2	8.88371e-09	-0.157457	0.139274	-0.0384959	6.02547e-09	0.00143739	2.65483e-05	0.296731	0.118961	-0.17777	0	0	0	-0.20045	-0.173398	-0.167556	-0.162996	-0.137122	-0.103219	0.166182	0.175866	0.096506	0.0907873	0.156992	0.183115	0.10547	0.00192424	-0.0610345	-0.0563774
Q96HV5	TMEM41A	Transmembrane protein 41A OS=Homo sapiens GN=TMEM41A PE=2 SV=1	15.1515	5	14	5	1	0	264	29.6	8.95843e-09	-0.256103	0.168579	-0.206984	1.21826e-08	0.449904	6.85415e-07	0.424682	0.0491191	-0.375563	0	0	1	-0.274737	-0.230999	-0.259114	-0.211543	-0.287435	-0.272789	0.100884	0.0966505	0.143769	0.224513	0.215445	0.157569	0.241224	-0.156051	-0.307759	-0.157142
O00217	NDUFS8	NADH dehydrogenase [ubiquinone] iron-sulfur protein 8, mitochondrial OS=Homo sapiens GN=NDUFS8 PE=1 SV=1	72.381	16	102	16	0	0	210	23.7	9.45577e-09	0.115327	-0.0750785	0.0125972	5.87843e-09	9.60875e-05	0.000343155	-0.190405	-0.10273	0.0876758	0	0	0	0.0918028	0.106892	0.147835	0.108396	0.116401	0.120634	-0.0531692	-0.0502007	-0.0725749	-0.0377204	-0.119344	-0.10061	-0.0919297	0.00506683	0.0184125	0.0143124
E7EUW2	LPHN3	Latrophilin-3 OS=Homo sapiens GN=LPHN3 PE=1 SV=1	9.24051	12	22	12	0	0	1580	175.9	9.55826e-09	-0.817044	0.452749	-0.828618	2.09146e-08	0.995165	2.4663e-07	1.26979	-0.0115733	-1.28137	1	0	1	-0.687493	-0.99194	-1.04012	-0.714206	-0.635403	-0.833109	0.480848	0.49403	0.263388	0.123899	0.570945	0.680032	0.556103	-0.906524	-0.682166	-0.897162
P46459	NSF	Vesicle-fusing ATPase OS=Homo sapiens GN=NSF PE=1 SV=3	56.0484	43	312	42	0	1	744	82.5	9.55844e-09	-0.136062	0.056905	-0.0288443	5.9513e-09	7.25439e-05	0.000477764	0.192967	0.107217	-0.0857493	0	0	0	-0.166604	-0.129595	-0.133031	-0.131604	-0.125645	-0.129891	0.0577506	0.0248811	0.0304403	0.116106	0.0355575	0.0701597	0.0634403	-0.0143904	-0.0427876	-0.0293547
O75884	RBBP9	Putative hydrolase RBBP9 OS=Homo sapiens GN=RBBP9 PE=1 SV=2	47.8495	6	25	6	2	0	186	21	9.75336e-09	0.136341	-0.206163	0.203817	4.93559e-08	0.18119	7.55966e-08	-0.342504	0.0674756	0.40998	0	0	1	0.0950493	0.131098	0.109269	0.149627	0.149159	0.183842	-0.169585	-0.152541	-0.258432	-0.184364	-0.163987	-0.177914	-0.336319	0.18778	0.23191	0.19176
Q08380	LGALS3BP	Galectin-3-binding protein OS=Homo sapiens GN=LGALS3BP PE=1 SV=1	41.0256	20	135	20	13	0	585	65.3	9.88308e-09	0.0501965	-0.114618	0.226686	3.65191e-06	2.31383e-05	8.80921e-09	-0.164814	0.176489	0.341304	0	0	0	0.0136356	0.0923438	0.0303378	0.0729792	0.0184969	0.0733855	-0.151637	-0.118102	-0.103888	-0.0592346	-0.128892	-0.172375	-0.0681971	0.240614	0.215309	0.224135
Q9UPT8	ZC3H4	Zinc finger CCCH domain-containing protein 4 OS=Homo sapiens GN=ZC3H4 PE=1 SV=3	32.1566	30	115	29	1	0	1303	140.2	1.03736e-08	-0.126647	0.0123942	0.0819031	1.59533e-07	2.18701e-08	0.00176178	0.139041	0.20855	0.0695089	0	0	0	-0.1537	-0.125982	-0.160021	-0.104532	-0.0855317	-0.130116	0.00731232	0.0360929	0.00546637	-0.018992	0.0303202	0.0193793	0.00718035	0.101707	0.0690944	0.0749079
Q8NBF6	AVL9	Late secretory pathway protein AVL9 homolog OS=Homo sapiens GN=AVL9 PE=1 SV=1	52.4691	24	82	24	2	0	648	71.9	1.03907e-08	0.142601	-0.126762	0.050916	7.75097e-09	0.00586196	1.19165e-05	-0.269363	-0.0916854	0.177678	0	0	0	0.127448	0.11144	0.115015	0.170488	0.170026	0.161191	-0.12126	-0.114441	-0.058747	-0.1873	-0.0961115	-0.16785	-0.141621	0.0500731	0.0493394	0.0533354
Q14692	BMS1	Ribosome biogenesis protein BMS1 homolog OS=Homo sapiens GN=BMS1 PE=1 SV=1	46.4119	56	251	56	56	0	1282	145.7	1.06919e-08	-0.0963055	0.0680632	-0.0510849	9.13369e-09	0.0245689	4.94604e-06	0.164369	0.0452207	-0.119148	0	0	0	-0.121681	-0.08428	-0.123855	-0.0887278	-0.0771976	-0.0820916	0.0514715	0.0702686	0.0824576	0.0966787	0.032856	0.0535334	0.0891764	-0.0421695	-0.0431839	-0.0679011
P14625	HSP90B1	Endoplasmin OS=Homo sapiens GN=HSP90B1 PE=1 SV=1	72.8518	62	3014	60	23	0	803	92.4	1.09309e-08	-0.0993649	0.107027	-0.0689134	1.33731e-08	0.29085	1.13804e-06	0.206392	0.0304516	-0.17594	0	0	0	-0.0456581	-0.100659	-0.0864135	-0.120976	-0.120271	-0.122212	0.0928963	0.0931696	0.109906	0.168228	0.0992378	0.0929517	0.092799	-0.0726817	-0.0494486	-0.0846098
Q3L8U1	CHD9	Chromodomain-helicase-DNA-binding protein 9 OS=Homo sapiens GN=CHD9 PE=1 SV=2	21.5395	55	140	34	0	0	2897	325.8	1.09635e-08	0.103637	-0.0948611	0.0857373	1.63351e-08	0.621653	6.50206e-07	-0.198498	-0.0178998	0.180598	0	0	0	0.152431	0.080848	0.103332	0.0559944	0.086033	0.143185	-0.101837	-0.118902	-0.0759351	-0.091575	-0.0940513	-0.10479	-0.0769382	0.0902217	0.0634491	0.103541
Q9UHK0	NUFIP1	Nuclear fragile X mental retardation-interacting protein 1 OS=Homo sapiens GN=NUFIP1 PE=1 SV=2	23.0303	12	33	12	12	0	495	56.3	1.10989e-08	-0.22024	0.114736	-0.0310068	6.93834e-09	6.95599e-05	0.000642713	0.334977	0.189234	-0.145743	0	0	0	-0.254875	-0.214516	-0.239176	-0.242269	-0.197095	-0.173512	0.135963	0.136651	0.0902861	0.189199	0.0330248	0.076847	0.141184	0.00866338	-0.0511624	-0.0505213
P52888	THOP1	Thimet oligopeptidase OS=Homo sapiens GN=THOP1 PE=1 SV=2	57.6197	44	292	44	2	0	689	78.8	1.11924e-08	0.0849589	-0.104589	0.0908384	2.68142e-08	0.947733	2.43471e-07	-0.189548	0.00587953	0.195427	0	0	0	0.0627281	0.0774626	0.0646424	0.107081	0.0987257	0.0991134	-0.0584028	-0.0674784	-0.105029	-0.110874	-0.11944	-0.110516	-0.160382	0.0864187	0.0789024	0.107194
Q9NQ50	MRPL40	39S ribosomal protein L40, mitochondrial OS=Homo sapiens GN=MRPL40 PE=1 SV=1	49.0291	10	41	10	10	0	206	24.5	1.13375e-08	0.13551	-0.0816363	-0.0121196	7.75402e-09	1.11994e-05	0.00757631	-0.217146	-0.147629	0.0695167	0	0	0	0.141749	0.125744	0.116694	0.137563	0.154338	0.136969	-0.100481	-0.0897217	-0.140199	-0.0607909	-0.0755248	-0.0895059	-0.0152305	-0.012384	-0.00162832	-0.0223464
Q9Y6Q1	CAPN6	Calpain-6 OS=Homo sapiens GN=CAPN6 PE=1 SV=2	6.55226	3	5	3	3	0	641	74.5	1.16367e-08	0.0424927	-0.372346	0.500901	4.93885e-06	2.21748e-05	1.00924e-08	-0.414838	0.458409	0.873247	0	1	1	-0.0502141	0.0324701	0.169473	0.0852368	-0.141997	0.159987	-0.378699	-0.324173	-0.378127	-0.278188	-0.368166	-0.411601	-0.467465	0.532414	0.413434	0.556856
P42765	ACAA2	3-ketoacyl-CoA thiolase, mitochondrial OS=Homo sapiens GN=ACAA2 PE=1 SV=2	87.9093	27	791	27	1	0	397	41.9	1.16431e-08	0.0627471	-0.114004	0.126775	1.31499e-07	0.0178801	4.29093e-08	-0.176752	0.0640276	0.240779	0	0	0	0.0306092	0.0903706	0.0417952	0.0724779	0.0648232	0.0764063	-0.129192	-0.141561	-0.106208	-0.169332	-0.0792	-0.103546	-0.0689927	0.140739	0.128333	0.111253
Q9Y5S2	CDC42BPB	Serine/threonine-protein kinase MRCK beta OS=Homo sapiens GN=CDC42BPB PE=1 SV=2	48.3928	84	277	40	40	48	1711	194.2	1.17301e-08	0.066599	-0.0633156	0.0280016	9.5486e-09	0.016006	7.20134e-06	-0.129915	-0.0385974	0.0913173	0	0	0	0.0543564	0.0545181	0.065713	0.0858241	0.0796795	0.0595028	-0.0344024	-0.051931	-0.0789947	-0.0460074	-0.0622468	-0.0970049	-0.0726223	0.0274067	0.0319814	0.0246167
Q8WUH1	CHURC1	Protein Churchill OS=Homo sapiens GN=CHURC1 PE=1 SV=2	45.3237	5	43	5	0	0	139	16.1	1.1785e-08	0.211647	-0.103014	-0.121182	2.29909e-08	2.07025e-07	0.820412	-0.31466	-0.332828	-0.0181678	0	1	0	0.184218	0.228487	0.244359	0.173362	0.206125	0.233328	-0.135543	-0.0845166	-0.113057	-0.208562	-0.0294762	-0.0910186	-0.0589241	-0.130037	-0.130334	-0.103174
P34897	SHMT2	Serine hydroxymethyltransferase, mitochondrial OS=Homo sapiens GN=SHMT2 PE=1 SV=3	83.7302	47	858	45	0	4	504	56	1.18578e-08	-0.119294	0.146937	-0.136783	3.29261e-08	0.794989	2.01385e-07	0.266232	-0.0174881	-0.28372	0	0	0	-0.131426	-0.0986279	-0.154249	-0.117258	-0.111	-0.103205	0.128152	0.123249	0.20854	0.232184	0.111584	0.0975706	0.127279	-0.128644	-0.12539	-0.156313
Q92504	SLC39A7	Zinc transporter SLC39A7 OS=Homo sapiens GN=SLC39A7 PE=1 SV=2	8.31557	2	16	2	0	0	469	50.1	1.21761e-08	-0.307967	0.237948	-0.21356	1.37556e-08	0.195188	1.64598e-06	0.545915	0.0944074	-0.451508	1	0	1	-0.380885	-0.242994	-0.355953	-0.255786	-0.260431	-0.351756	0.211923	0.163455	0.0982167	0.352768	0.22622	0.285872	0.327182	-0.204637	-0.227153	-0.20889
Q9NPD8	UBE2T	Ubiquitin-conjugating enzyme E2 T OS=Homo sapiens GN=UBE2T PE=1 SV=1	57.868	11	100	11	11	0	197	22.5	1.2181e-08	0.149256	-0.15254	0.122155	1.81812e-08	0.628941	7.15528e-07	-0.301797	-0.0271019	0.274695	0	0	0	0.11954	0.176804	0.115872	0.139562	0.16266	0.1811	-0.114111	-0.10331	-0.162887	-0.0838334	-0.216317	-0.193388	-0.193935	0.119549	0.0949057	0.152008
Q9UBU8	MORF4L1	Mortality factor 4-like protein 1 OS=Homo sapiens GN=MORF4L1 PE=1 SV=2	63.5359	21	165	18	0	4	362	41.4	1.21931e-08	-0.113209	0.0529354	0.0493382	1.76373e-08	4.00039e-07	0.97096	0.166145	0.162547	-0.00359721	0	0	0	-0.137921	-0.0944133	-0.148255	-0.134762	-0.0777414	-0.0861624	0.0681106	0.0543164	0.0753006	0.0269459	0.0365707	0.0528178	0.0564857	0.0368723	0.0520005	0.0591417
Q96SM3	CPXM1	Probable carboxypeptidase X1 OS=Homo sapiens GN=CPXM1 PE=2 SV=2	9.53678	6	8	6	6	0	734	81.6	1.22031e-08	-0.278686	0.184522	-0.196804	1.36248e-08	0.182631	1.71959e-06	0.463207	0.0818817	-0.381326	1	0	1	-0.301867	-0.327486	-0.250534	-0.28982	-0.25901	-0.243398	0.131602	0.176187	0.200921	0.289045	0.138557	0.0790382	0.276302	-0.192614	-0.13598	-0.261818
Q68DQ2	CRYBG3	Very large A-kinase anchor protein OS=Homo sapiens GN=CRYBG3 PE=1 SV=3	30.5051	66	134	66	45	0	2970	330.4	1.24837e-08	0.08055	-0.131917	0.11175	4.97879e-08	0.366153	1.26871e-07	-0.212467	0.0312003	0.243667	0	0	0	0.0807182	0.0859706	0.0335062	0.0582095	0.0978923	0.127003	-0.178079	-0.129754	-0.129474	-0.145804	-0.130538	-0.138503	-0.0712648	0.137372	0.0823868	0.115492
Q99496	RNF2	E3 ubiquitin-protein ligase RING2 OS=Homo sapiens GN=RNF2 PE=1 SV=1	43.4524	12	68	9	0	3	336	37.6	1.2597e-08	-0.0658817	0.0838587	-0.0739369	3.32168e-08	0.856772	2.31726e-07	0.14974	-0.00805512	-0.157796	0	0	0	-0.10013	-0.0449918	-0.0666698	-0.0603626	-0.0870041	-0.036132	0.0617072	0.0786457	0.101136	0.110274	0.0602016	0.0932244	0.0818231	-0.051942	-0.0786638	-0.0912047
Q969E4	TCEAL3	Transcription elongation factor A protein-like 3 OS=Homo sapiens GN=TCEAL3 PE=1 SV=1	56.5	10	34	10	3	0	200	22.5	1.26339e-08	0.344761	-0.479454	0.249753	1.724e-08	0.471118	9.42716e-07	-0.824215	-0.0950078	0.729207	1	0	1	0.354109	0.345297	0.354846	0.37689	0.32609	0.311331	-0.41144	-0.422263	-0.223933	-0.716153	-0.422176	-0.56106	-0.599154	0.23128	0.209137	0.308841
Q9UPN9	TRIM33	E3 ubiquitin-protein ligase TRIM33 OS=Homo sapiens GN=TRIM33 PE=1 SV=3	44.4543	47	219	3	0	58	1127	122.5	1.29959e-08	0.0510067	-0.0466087	0.0689825	6.15871e-08	0.230478	1.07085e-07	-0.0976155	0.0179758	0.115591	0	0	0	0.0512038	0.0279376	0.041157	0.0483859	0.065378	0.071978	-0.0427161	-0.0323776	-0.0672726	-0.064386	-0.0291606	-0.0424825	-0.0478657	0.0772115	0.0568163	0.0729199
Q96CP6	GRAMD1A	GRAM domain-containing protein 1A OS=Homo sapiens GN=GRAMD1A PE=1 SV=2	40.4696	23	63	22	0	1	724	80.6	1.31184e-08	-0.130693	0.140641	-0.075499	1.35428e-08	0.114489	2.4752e-06	0.271334	0.0551939	-0.21614	0	0	0	-0.136532	-0.142427	-0.170598	-0.119354	-0.0804391	-0.134808	0.122405	0.139638	0.101409	0.233184	0.1214	0.117093	0.149361	-0.073284	-0.0546497	-0.0985633
O94808	GFPT2	Glutamine--fructose-6-phosphate aminotransferase [isomerizing] 2 OS=Homo sapiens GN=GFPT2 PE=1 SV=3	51.6129	29	123	21	14	0	682	76.9	1.31642e-08	0.0572238	0.0364544	-0.162461	0.277484	1.5859e-08	3.9506e-08	-0.0207695	-0.219685	-0.198916	0	0	0	0.0314272	0.0551594	0.0423564	0.0529227	0.0872438	0.0742334	0.0630235	0.072406	0.0280801	0.0588275	-0.00449486	0.0182894	0.0190491	-0.159445	-0.160733	-0.167206
Q9HAU5	UPF2	Regulator of nonsense transcripts 2 OS=Homo sapiens GN=UPF2 PE=1 SV=1	47.7987	54	191	54	29	0	1272	147.7	1.32378e-08	0.0711011	-0.0757011	0.0665462	2.46446e-08	0.946997	4.63059e-07	-0.146802	-0.00455495	0.142247	0	0	0	0.0533178	0.0765511	0.0548845	0.0750267	0.070607	0.0962197	-0.0737542	-0.0210267	-0.0741647	-0.0854847	-0.0901979	-0.100206	-0.0850729	0.0763802	0.0664587	0.0567997
Q9H1U4	MEGF9	Multiple epidermal growth factor-like domains protein 9 OS=Homo sapiens GN=MEGF9 PE=2 SV=3	17.4419	7	20	7	7	0	602	62.9	1.33428e-08	0.0436672	-0.196748	0.260172	2.173e-06	8.39661e-05	1.43045e-08	-0.240415	0.216505	0.45692	0	0	1	0.0298817	0.10025	0.00372479	0.0298149	0.0412654	0.0570664	-0.254777	-0.23334	-0.235186	-0.105199	-0.17679	-0.176289	-0.195655	0.332436	0.261088	0.186992
Q03518	TAP1	Antigen peptide transporter 1 OS=Homo sapiens GN=TAP1 PE=1 SV=2	14.604	10	47	10	10	0	808	87.2	1.34305e-08	0.0732943	-0.0933595	0.0702099	2.62657e-08	0.980953	4.23937e-07	-0.166654	-0.0030844	0.163569	0	0	0	0.0262265	0.0774333	0.0788575	0.0783197	0.108564	0.0703645	-0.0968369	-0.110112	-0.112741	-0.0604832	-0.0938808	-0.117976	-0.0614868	0.0782368	0.0602302	0.0721625
P55011	SLC12A2	Solute carrier family 12 member 2 OS=Homo sapiens GN=SLC12A2 PE=1 SV=1	33.4983	30	92	30	0	0	1212	131.4	1.35383e-08	-0.200639	0.134371	-0.0596333	9.0227e-09	0.00125839	5.25052e-05	0.33501	0.141006	-0.194004	0	0	0	-0.219761	-0.190683	-0.225964	-0.184533	-0.200258	-0.182636	0.0569397	0.0662689	0.107375	0.198243	0.13743	0.171377	0.202962	-0.036751	-0.0664298	-0.0757192
P46087-4	NOP2	Isoform 4 of Probable 28S rRNA (cytosine(4447)-C(5))-methyltransferase OS=Homo sapiens GN=NOP2	60.1183	46	443	46	0	0	845	92.8	1.36266e-08	-0.14874	0.0999844	-0.0904361	1.29199e-08	0.0633711	3.68977e-06	0.248724	0.0583037	-0.190421	0	0	0	-0.166458	-0.148916	-0.182433	-0.142383	-0.110715	-0.141533	0.0995559	0.0616874	0.0485689	0.169796	0.0797443	0.105621	0.134918	-0.0777363	-0.0875343	-0.106038
Q92609-2	TBC1D5	Isoform 2 of TBC1 domain family member 5 OS=Homo sapiens GN=TBC1D5	65.6059	39	190	39	0	0	817	91.2	1.3853e-08	0.14616	-0.140539	0.10379	1.69624e-08	0.302438	1.42231e-06	-0.2867	-0.0423701	0.24433	0	0	0	0.125283	0.151562	0.124466	0.174581	0.157804	0.143266	-0.12826	-0.0843459	-0.152888	-0.0667381	-0.147736	-0.179708	-0.224099	0.113595	0.099287	0.0984886
Q8WY36	BBX	HMG box transcription factor BBX OS=Homo sapiens GN=BBX PE=1 SV=1	31.7747	24	71	24	0	0	941	105.1	1.3996e-08	0.0729436	-0.0781209	0.0724015	2.90511e-08	0.999288	3.91735e-07	-0.151065	-0.000542093	0.150522	0	0	0	0.0814217	0.0810855	0.0330798	0.0821433	0.0778291	0.0821023	-0.0618394	-0.059875	-0.0568305	-0.106781	-0.0698712	-0.11804	-0.073609	0.0894627	0.0652882	0.0624537
Q13472	TOP3A	DNA topoisomerase 3-alpha OS=Homo sapiens GN=TOP3A PE=1 SV=1	44.2557	33	90	32	0	1	1001	112.3	1.40838e-08	0.040349	-0.0512156	0.0222079	1.47727e-08	0.129045	2.48741e-06	-0.0915646	-0.0181411	0.0734235	0	0	0	0.0264108	0.0414635	0.0351898	0.0471615	0.0475789	0.0442897	-0.0425358	-0.0474689	-0.0740316	-0.0444716	-0.0493219	-0.0708825	-0.0297968	0.0188567	0.0172592	0.0305079
O43933	PEX1	Peroxisome biogenesis factor 1 OS=Homo sapiens GN=PEX1 PE=1 SV=1	32.1902	37	87	37	0	0	1283	142.8	1.41565e-08	0.0688818	-0.0900071	0.0307769	1.32385e-08	0.0576609	4.07899e-06	-0.158889	-0.0381049	0.120784	0	0	0	0.0631811	0.0505416	0.0461324	0.0901473	0.078053	0.0852354	-0.0926286	-0.0952487	-0.121365	-0.0491208	-0.0854534	-0.117786	-0.0684474	0.0291071	0.0391578	0.0240657
Q9Y3A6	TMED5	Transmembrane emp24 domain-containing protein 5 OS=Homo sapiens GN=TMED5 PE=1 SV=1	22.2707	8	40	8	3	0	229	26	1.42078e-08	-0.174571	0.164371	-0.125125	1.75072e-08	0.312702	1.42792e-06	0.338942	0.049446	-0.289496	0	0	0	-0.201612	-0.162865	-0.188969	-0.183905	-0.169263	-0.140813	0.152095	0.134621	0.0531223	0.218534	0.182011	0.207828	0.20239	-0.154375	-0.0669033	-0.154096
Q06323	PSME1	Proteasome activator complex subunit 1 OS=Homo sapiens GN=PSME1 PE=1 SV=1	76.7068	19	236	19	0	0	249	28.7	1.42292e-08	0.241665	-0.375279	0.263725	3.47273e-08	0.933996	2.96089e-07	-0.616944	0.0220608	0.639004	1	0	1	0.320718	0.266963	0.28485	0.283118	0.04992	0.24442	-0.25735	-0.346167	-0.28132	-0.350465	-0.437987	-0.431972	-0.521692	0.268121	0.233742	0.289313
O95292	VAPB	Vesicle-associated membrane protein-associated protein B/C OS=Homo sapiens GN=VAPB PE=1 SV=3	53.0864	14	177	13	9	0	243	27.2	1.44057e-08	-0.129679	0.0647866	-0.0882514	1.44844e-08	0.0981757	3.01267e-06	0.194466	0.0414277	-0.153038	0	0	0	-0.145143	-0.123262	-0.146755	-0.0864008	-0.107132	-0.169383	0.106496	0.0856302	0.0714306	0.0637234	0.0385414	0.0348962	0.0527884	-0.0815605	-0.0814756	-0.101718
P00387-3	CYB5R3	Isoform 3 of NADH-cytochrome b5 reductase 3 OS=Homo sapiens GN=CYB5R3	55.988	16	190	16	0	0	334	38.2	1.45618e-08	-0.174075	0.126395	-0.0960765	1.29583e-08	0.0389921	5.34772e-06	0.30047	0.0779989	-0.222472	0	0	0	-0.213232	-0.159839	-0.191123	-0.154234	-0.179751	-0.146273	0.122106	0.100999	0.059903	0.220497	0.138557	0.151469	0.0912343	-0.111791	-0.0663053	-0.110133
Q8IY81	FTSJ3	pre-rRNA processing protein FTSJ3 OS=Homo sapiens GN=FTSJ3 PE=1 SV=2	47.8158	40	295	40	37	0	847	96.5	1.46029e-08	-0.165142	0.0900898	-0.052166	9.53626e-09	0.000854336	8.05427e-05	0.255232	0.112976	-0.142256	0	0	0	-0.184529	-0.160833	-0.222674	-0.152614	-0.134416	-0.135788	0.0902131	0.0709361	0.0400403	0.123175	0.0570542	0.105842	0.143368	-0.0539445	-0.0397674	-0.0627862
P16234	PDGFRA	Platelet-derived growth factor receptor alpha OS=Homo sapiens GN=PDGFRA PE=1 SV=1	17.539	16	34	15	0	0	1089	122.6	1.46118e-08	-0.446319	0.400728	-0.755311	1.65928e-07	0.0192764	5.31752e-08	0.847048	-0.308991	-1.15604	1	1	1	-0.42842	-0.492268	-0.574148	-0.373897	-0.35604	-0.453145	0.240946	0.28271	0.196266	0.335025	0.476095	0.595561	0.678496	-0.81273	-0.675013	-0.778189
O75691	UTP20	Small subunit processome component 20 homolog OS=Homo sapiens GN=UTP20 PE=1 SV=3	53.6086	122	565	122	122	0	2785	318.2	1.46224e-08	-0.158205	0.127431	-0.101054	1.52558e-08	0.12581	2.63228e-06	0.285636	0.057151	-0.228485	0	0	0	-0.169298	-0.1677	-0.195907	-0.148859	-0.129156	-0.138313	0.0815329	0.0970002	0.0645697	0.146206	0.129908	0.159688	0.21311	-0.100648	-0.0881083	-0.114407
P30533	LRPAP1	Alpha-2-macroglobulin receptor-associated protein OS=Homo sapiens GN=LRPAP1 PE=1 SV=1	58.5434	25	122	25	23	0	357	41.4	1.51667e-08	-0.339464	0.213735	-0.198842	1.36835e-08	0.0442736	5.1841e-06	0.553199	0.140623	-0.412577	1	0	1	-0.355811	-0.338283	-0.349566	-0.324408	-0.323527	-0.345189	0.109009	0.104854	0.137228	0.171555	0.310161	0.308533	0.354804	-0.192418	-0.185477	-0.218629
Q9P015	MRPL15	39S ribosomal protein L15, mitochondrial OS=Homo sapiens GN=MRPL15 PE=1 SV=1	54.7297	15	67	15	0	0	296	33.4	1.53778e-08	0.183886	-0.0841248	-0.0878424	2.53288e-08	3.72851e-07	0.988648	-0.268011	-0.271729	-0.00371762	0	1	0	0.186476	0.163469	0.164128	0.173637	0.20297	0.212639	-0.145613	-0.13425	-0.0993773	0.00616596	-0.0765585	-0.0804465	-0.0587942	-0.074996	-0.0791863	-0.109345
O60637	TSPAN3	Tetraspanin-3 OS=Homo sapiens GN=TSPAN3 PE=2 SV=1	19.3676	4	12	4	0	0	253	28	1.5403e-08	-0.395232	0.204176	-0.187581	1.14291e-08	0.0064567	1.83369e-05	0.599408	0.207651	-0.391757	1	0	1	-0.301311	-0.446535	-0.536541	-0.397944	-0.306789	-0.382273	0.218499	0.269974	0.134045	0.283127	0.0905591	0.157543	0.275484	-0.159219	-0.159975	-0.243549
Q6UW63	KDELC1	KDEL motif-containing protein 1 OS=Homo sapiens GN=KDELC1 PE=1 SV=1	65.9363	29	130	28	28	0	502	58	1.54876e-08	-0.146164	0.0694937	-0.0249137	9.72555e-09	9.55184e-05	0.000772295	0.215657	0.12125	-0.0944074	0	0	0	-0.159951	-0.140122	-0.167095	-0.149596	-0.120145	-0.140074	0.0637395	0.0427173	0.0313913	0.134723	0.0373198	0.0799561	0.0966091	-0.0272441	-0.0105236	-0.0369734
Q8NEC7	GSTCD	Glutathione S-transferase C-terminal domain-containing protein OS=Homo sapiens GN=GSTCD PE=1 SV=2	49.4471	23	69	23	0	0	633	71	1.56127e-08	0.126669	-0.098041	0.0484919	1.15572e-08	0.00630754	1.8958e-05	-0.22471	-0.078177	0.146533	0	0	0	0.0976684	0.13977	0.115822	0.128959	0.10973	0.168064	-0.108213	-0.0676094	-0.0757918	-0.0517925	-0.0990082	-0.135613	-0.14826	0.0577149	0.0297752	0.0579856
E7EPH8	GRAMD1B	GRAM domain-containing protein 1B OS=Homo sapiens GN=GRAMD1B PE=1 SV=1	23.7584	15	24	14	0	0	745	86.2	1.57301e-08	-0.180702	0.146908	-0.176785	3.15588e-08	0.992236	4.67636e-07	0.32761	0.00391705	-0.323693	0	0	0	-0.236727	-0.205229	-0.169548	-0.15759	-0.15254	-0.162576	0.150902	0.0569388	0.0747521	0.189401	0.17241	0.227355	0.156598	-0.16188	-0.182155	-0.186318
Q6IQ19	CCSAP	Centriole, cilia and spindle-associated protein OS=Homo sapiens GN=CCSAP PE=1 SV=2	37.037	6	12	6	1	0	270	30.2	1.58448e-08	0.17581	-0.238137	0.151	2.64039e-08	0.819912	7.01359e-07	-0.413947	-0.0248091	0.389138	0	0	1	0.18468	0.170332	0.113196	0.228519	0.238791	0.119339	-0.24326	-0.176197	-0.17996	-0.206938	-0.19471	-0.33184	-0.334058	0.126067	0.182676	0.144258
P50895	BCAM	Basal cell adhesion molecule OS=Homo sapiens GN=BCAM PE=1 SV=2	55.8917	28	139	28	2	0	628	67.4	1.58449e-08	-0.138959	0.0711604	-0.0239396	9.93091e-09	0.000126073	0.000585916	0.210119	0.115019	-0.0951	0	0	0	-0.181457	-0.127467	-0.112646	-0.103327	-0.143894	-0.164964	0.0580502	0.0775964	0.0493392	0.126273	0.0755766	0.03847	0.0728177	-0.0139724	-0.033317	-0.0245293
Q01860	POU5F1	POU domain, class 5, transcription factor 1 OS=Homo sapiens GN=POU5F1 PE=1 SV=1	27.5	10	75	9	0	1	360	38.5	1.58491e-08	0.319604	-0.217554	0.0348506	9.9331e-09	0.000171678	0.000419367	-0.537158	-0.284753	0.252405	1	1	0	0.30477	0.340358	0.334059	0.333367	0.313785	0.291282	-0.199041	-0.177084	-0.135353	-0.0713166	-0.290941	-0.355023	-0.294121	0.0315037	0.0190378	0.0540104
Q99797	MIPEP	Mitochondrial intermediate peptidase OS=Homo sapiens GN=MIPEP PE=1 SV=2	57.223	35	133	34	34	1	713	80.6	1.58662e-08	0.17053	-0.115913	-0.00443308	1.01861e-08	4.32428e-05	0.00211042	-0.286442	-0.174963	0.11148	0	0	0	0.146559	0.166351	0.181712	0.193055	0.15852	0.176981	-0.174635	-0.178334	-0.0819021	-0.126085	-0.0935373	-0.1182	-0.0386973	0.0213579	-0.032238	-0.00241918
P43699-3	NKX2-1	Isoform 3 of Homeobox protein Nkx-2.1 OS=Homo sapiens GN=NKX2-1	11.4713	4	8	3	0	0	401	41.7	1.61508e-08	-0.052222	-0.465594	0.692928	0.000100957	2.53627e-06	1.04879e-08	-0.413372	0.74515	1.15852	0	1	1	-0.0983461	-0.0260644	-0.0919752	0.015112	-0.0847701	-0.0272882	-0.661864	-0.642448	-0.565734	-0.406453	-0.278009	-0.448461	-0.25619	0.749605	0.582674	0.746505
Q9Y546	LRRC42	Leucine-rich repeat-containing protein 42 OS=Homo sapiens GN=LRRC42 PE=1 SV=1	47.4299	19	71	19	9	0	428	48.5	1.61772e-08	0.029456	-0.105861	0.162912	3.87298e-06	5.68636e-05	1.57365e-08	-0.135317	0.133456	0.268773	0	0	0	0.0435434	0.0243887	-0.0138812	0.0189017	0.0375742	0.0662089	-0.0708128	-0.0645795	-0.10812	-0.0799893	-0.151319	-0.141567	-0.12464	0.167042	0.165929	0.155764
Q15814	TBCC	Tubulin-specific chaperone C OS=Homo sapiens GN=TBCC PE=1 SV=2	76.0116	23	112	23	23	0	346	39.2	1.6201e-08	0.0324367	-0.0787064	0.102583	6.9713e-07	0.000890522	2.73149e-08	-0.111143	0.0701458	0.181289	0	0	0	0.0189638	0.0182554	0.0200855	0.0494725	0.0500769	0.0377663	-0.0606948	-0.0484487	-0.112368	-0.106167	-0.0732827	-0.0835947	-0.0663885	0.106399	0.0787397	0.122609
O00629	KPNA4	Importin subunit alpha-3 OS=Homo sapiens GN=KPNA4 PE=1 SV=1	52.3992	21	186	15	11	6	521	57.9	1.62104e-08	-0.0365354	0.0718689	-0.0522679	6.38837e-08	0.388308	1.65074e-07	0.108404	-0.0157325	-0.124137	0	0	0	-0.0521584	-0.0332909	-0.0628331	-0.0204763	-0.0295128	-0.0209411	0.0752285	0.107092	0.0662028	0.0501071	0.0775136	0.06808	0.0588584	-0.0528752	-0.0526183	-0.0513104
Q16851	UGP2	UTP--glucose-1-phosphate uridylyltransferase OS=Homo sapiens GN=UGP2 PE=1 SV=5	71.6535	34	397	34	0	0	508	56.9	1.62813e-08	0.058486	-0.102181	0.129185	2.68289e-07	0.00759318	4.56001e-08	-0.160667	0.0706988	0.231365	0	0	0	0.030984	0.0714639	0.033779	0.0786367	0.0710378	0.0650146	-0.0711554	-0.0882158	-0.144066	-0.0661353	-0.0861717	-0.10322	-0.156301	0.12336	0.124144	0.14005
Q9HAN9	NMNAT1	Nicotinamide/nicotinic acid mononucleotide adenylyltransferase 1 OS=Homo sapiens GN=NMNAT1 PE=1 SV=1	68.1004	14	59	14	5	0	279	31.9	1.65763e-08	-0.160836	0.0768262	-0.0401596	1.04385e-08	0.000267422	0.000284484	0.237663	0.120677	-0.116986	0	0	0	-0.162426	-0.156069	-0.196193	-0.150668	-0.170424	-0.12924	0.0558168	0.0789087	0.00372812	0.0780142	0.102596	0.0862248	0.132494	-0.0273567	-0.0425315	-0.0505905
O75914-3	PAK3	Isoform 3 of Serine/threonine-protein kinase PAK 3 OS=Homo sapiens GN=PAK3	31.0345	18	129	3	0	0	580	64.5	1.66109e-08	0.167975	-0.608925	0.523362	2.98475e-07	0.00618356	4.40349e-08	-0.7769	0.355386	1.13229	1	1	1	0.178128	0.147258	0.186711	0.181688	0.190656	0.123411	-0.429555	-0.625144	-0.580816	-0.372592	-0.680732	-0.633135	-0.940499	0.450422	0.646587	0.473076
Q9H6S0	YTHDC2	Probable ATP-dependent RNA helicase YTHDC2 OS=Homo sapiens GN=YTHDC2 PE=1 SV=2	58.042	71	281	71	32	0	1430	160.1	1.67111e-08	0.152924	-0.0872601	0.000860686	1.09239e-08	3.17233e-05	0.00347624	-0.240184	-0.152063	0.0881208	0	0	0	0.151077	0.162416	0.120079	0.14323	0.163185	0.177556	-0.122855	-0.0627887	-0.0189667	-0.0942266	-0.0785344	-0.149699	-0.083751	0.011444	-0.00862418	-0.000237733
A1X283	SH3PXD2B	SH3 and PX domain-containing protein 2B OS=Homo sapiens GN=SH3PXD2B PE=1 SV=3	66.191	56	245	52	33	4	911	101.5	1.69828e-08	0.0977257	-0.109481	0.091181	3.15299e-08	0.947248	5.89299e-07	-0.207207	-0.00654469	0.200662	0	0	0	0.0650678	0.119141	0.0934456	0.0967175	0.0967293	0.115253	-0.0830846	-0.103758	-0.0416991	-0.149088	-0.114347	-0.132904	-0.141487	0.0894072	0.0704702	0.113665
Q8NHP8	PLBD2	Putative phospholipase B-like 2 OS=Homo sapiens GN=PLBD2 PE=1 SV=2	32.7674	17	79	17	3	0	589	65.4	1.72994e-08	-0.279273	0.148253	-0.0799205	1.11193e-08	0.000605502	0.000138985	0.427526	0.199353	-0.228173	1	0	0	-0.282218	-0.272112	-0.33602	-0.27538	-0.213916	-0.295994	0.0862229	0.0709285	0.0633084	0.227621	0.183878	0.179111	0.226701	-0.0918789	-0.054904	-0.0929785
Q9Y221	NIP7	60S ribosome subunit biogenesis protein NIP7 homolog OS=Homo sapiens GN=NIP7 PE=1 SV=1	85.5556	13	119	13	1	0	180	20.4	1.77266e-08	-0.122452	0.120602	-0.0743717	1.86436e-08	0.138484	3.06037e-06	0.243055	0.0480806	-0.194974	0	0	0	-0.158077	-0.0970684	-0.156619	-0.127546	-0.0983639	-0.0970388	0.116104	0.0776808	0.10984	0.201472	0.0914842	0.12617	0.121466	-0.0666457	-0.0926906	-0.0637787
Q9BTZ2	DHRS4	Dehydrogenase/reductase SDR family member 4 OS=Homo sapiens GN=DHRS4 PE=1 SV=3	62.5899	14	74	14	0	0	278	29.5	1.7761e-08	-0.165759	0.0849593	-0.046073	1.13426e-08	0.000498829	0.000172591	0.250718	0.119686	-0.131032	0	0	0	-0.197809	-0.17622	-0.180165	-0.133758	-0.170407	-0.136193	0.0292813	0.0739702	0.0949111	0.0715266	0.102266	0.0694493	0.15331	-0.0244037	-0.0314729	-0.0823422
A0A0B4J1T2	AR	Androgen receptor OS=Homo sapiens GN=AR PE=1 SV=1	23.1522	14	32	14	0	0	920	99.1	1.80021e-08	0.106818	-0.170841	0.0977066	3.3256e-08	0.943676	6.29119e-07	-0.277659	-0.00911183	0.268547	0	0	0	0.058682	0.0939543	0.109979	0.0973925	0.166371	0.114533	-0.214449	-0.0815013	-0.186624	-0.156906	-0.145435	-0.207885	-0.203084	0.11913	0.0962992	0.0776909
Q9BQG0-2	MYBBP1A	Isoform 2 of Myb-binding protein 1A OS=Homo sapiens GN=MYBBP1A	53.1532	66	599	66	0	0	1332	149.3	1.80376e-08	-0.11234	0.0707026	-0.0337936	1.1969e-08	0.00129577	7.6193e-05	0.183042	0.0785463	-0.104496	0	0	0	-0.126959	-0.106834	-0.133458	-0.111715	-0.0897639	-0.105309	0.0561054	0.0442791	0.0388571	0.118362	0.0487109	0.0805995	0.108004	-0.0332735	-0.0272044	-0.040903
Q9UIQ6	LNPEP	Leucyl-cystinyl aminopeptidase OS=Homo sapiens GN=LNPEP PE=1 SV=3	31.2195	25	109	25	1	0	1025	117.3	1.80417e-08	0.158304	-0.146403	0.12267	2.45084e-08	0.480674	1.33694e-06	-0.304706	-0.035634	0.269072	0	0	0	0.147714	0.167436	0.172789	0.176846	0.1342	0.150837	-0.127301	-0.135067	-0.12233	-0.0545065	-0.218753	-0.230191	-0.13667	0.132111	0.115215	0.120683
Q9HCM4	EPB41L5	Band 4.1-like protein 5 OS=Homo sapiens GN=EPB41L5 PE=1 SV=3	64.2565	31	233	2	1	43	733	81.8	1.83654e-08	-0.161302	0.0839764	0.0210355	1.39776e-08	7.14366e-06	0.037682	0.245279	0.182338	-0.0629409	0	0	0	-0.162013	-0.153557	-0.207617	-0.129636	-0.143984	-0.171008	0.105509	0.13916	0.0805983	0.0140456	0.0716233	0.0735924	0.103306	0.0232956	0.0442028	-0.00439205
P10746	UROS	Uroporphyrinogen-III synthase OS=Homo sapiens GN=UROS PE=1 SV=1	50.1887	10	30	10	3	0	265	28.6	1.83767e-08	0.188334	-0.208998	0.0288707	1.25875e-08	0.00229802	4.92698e-05	-0.397332	-0.159463	0.237868	0	0	0	0.16372	0.176159	0.181109	0.21955	0.193715	0.195751	-0.190491	-0.179298	-0.174298	-0.0943046	-0.219599	-0.28957	-0.315423	0.0153089	0.0401089	0.0311941
A0A087WYM3	SIRT2	NAD-dependent protein deacetylase sirtuin-2 OS=Homo sapiens GN=SIRT2 PE=1 SV=1	38.0463	13	41	13	0	0	389	43.3	1.84733e-08	0.161059	-0.138261	0.0294298	1.21376e-08	0.00106603	9.28214e-05	-0.29932	-0.131629	0.167691	0	0	0	0.132902	0.152916	0.148382	0.1774	0.168258	0.186494	-0.152708	-0.0910455	-0.0806434	-0.0923032	-0.148681	-0.225561	-0.176888	0.0306741	0.00581432	0.0518011
Q9NWZ5	UCKL1	Uridine-cytidine kinase-like 1 OS=Homo sapiens GN=UCKL1 PE=1 SV=2	33.0292	16	42	16	0	0	548	61.1	1.85129e-08	0.097901	-0.152393	0.128424	6.55501e-08	0.506719	2.15377e-07	-0.250294	0.0305235	0.280817	0	0	0	0.0920452	0.0845461	0.0755515	0.105659	0.121357	0.108247	-0.096029	-0.206715	-0.205198	-0.111256	-0.205112	-0.137952	-0.104488	0.139608	0.0996396	0.146026
Q96F85	CNRIP1	CB1 cannabinoid receptor-interacting protein 1 OS=Homo sapiens GN=CNRIP1 PE=1 SV=1	40.2439	4	7	4	0	0	164	18.6	1.87923e-08	-0.984348	0.542729	-0.760247	2.31215e-08	0.323886	1.86759e-06	1.52708	0.224102	-1.30298	1	0	1	-1.03075	-0.897742	-1.03892	-0.99595	-0.980111	-0.962623	0.802342	0.846334	0.699523	0.789676	0.235587	0.248716	0.176922	-0.77188	-0.68738	-0.821479
Q8NEY1	NAV1	Neuron navigator 1 OS=Homo sapiens GN=NAV1 PE=1 SV=2	31.8594	48	120	48	0	0	1877	202.3	1.88248e-08	-0.0268656	-0.129698	0.235773	0.000976185	8.08699e-07	1.18708e-08	-0.102832	0.262639	0.365471	0	0	1	-0.0533055	-0.00731878	-0.0799979	-0.0374403	0.0115868	0.00528215	-0.109201	-0.105606	-0.0695258	-0.178622	-0.0974879	-0.171603	-0.175837	0.260235	0.21718	0.229904
P00491	PNP	Purine nucleoside phosphorylase OS=Homo sapiens GN=PNP PE=1 SV=2	87.5433	21	368	21	7	0	289	32.1	1.89467e-08	0.257425	-0.143792	0.0874582	1.26526e-08	0.00149495	7.24504e-05	-0.401218	-0.169967	0.23125	0	0	0	0.23167	0.286735	0.234559	0.24128	0.244046	0.306261	-0.102877	-0.0399269	-0.133574	-0.0970423	-0.17281	-0.223179	-0.237137	0.0807602	0.0698386	0.111776
O43524	FOXO3	Forkhead box protein O3 OS=Homo sapiens GN=FOXO3 PE=1 SV=1	16.3447	7	20	5	1	0	673	71.2	1.94629e-08	0.181864	-0.223794	0.215679	5.80562e-08	0.716442	2.88255e-07	-0.405658	0.0338153	0.439473	0	0	1	0.16367	0.262998	0.153281	0.15765	0.165631	0.187952	-0.143978	-0.158196	-0.179813	-0.176499	-0.309621	-0.335719	-0.262732	0.195866	0.191116	0.260055
Q92994	BRF1	Transcription factor IIIB 90 kDa subunit OS=Homo sapiens GN=BRF1 PE=1 SV=1	26.7356	12	35	12	0	0	677	73.8	1.9601e-08	0.120956	-0.179284	0.094045	2.92958e-08	0.651526	1.11706e-06	-0.30024	-0.0269107	0.273329	0	0	0	0.0750394	0.102308	0.0992714	0.139056	0.133293	0.176767	-0.131501	-0.160467	-0.117642	-0.253792	-0.176407	-0.223776	-0.191403	0.121809	0.0519066	0.10842
P23246	SFPQ	Splicing factor, proline- and glutamine-rich OS=Homo sapiens GN=SFPQ PE=1 SV=2	56.4356	46	1704	6	6	77	707	76.1	1.96787e-08	-0.116197	0.0181955	0.0294839	4.25649e-08	2.81616e-07	0.688588	0.134392	0.145681	0.0112884	0	0	0	-0.0846034	-0.121188	-0.125421	-0.128955	-0.114194	-0.122818	0.0393983	0.0137161	0.0381721	0.0412992	-0.0200371	0.0169708	-0.00215081	0.0203031	0.0455085	0.0226402
P23469	PTPRE	Receptor-type tyrosine-protein phosphatase epsilon OS=Homo sapiens GN=PTPRE PE=1 SV=1	18.4286	9	18	7	0	0	700	80.6	1.9751e-08	0.30147	-0.38514	0.33754	5.15915e-08	0.871759	3.59951e-07	-0.686611	0.0360696	0.72268	1	0	1	0.302575	0.272932	0.272802	0.292314	0.271825	0.396374	-0.592115	-0.438553	-0.166239	-0.271275	-0.367786	-0.487059	-0.372955	0.39387	0.292063	0.326687
O14681	EI24	Etoposide-induced protein 2.4 homolog OS=Homo sapiens GN=EI24 PE=1 SV=4	15	6	24	6	0	0	340	38.9	1.99867e-08	-0.170318	0.0810766	-0.00866461	1.32193e-08	3.16965e-05	0.00476968	0.251394	0.161653	-0.0897412	0	0	0	-0.24889	-0.150966	-0.15905	-0.157979	-0.146896	-0.158124	0.09447	0.0340594	0.0996695	0.0440567	0.0825179	0.098738	0.114025	0.0207319	-0.0295452	-0.0171805
Q01974	ROR2	Tyrosine-protein kinase transmembrane receptor ROR2 OS=Homo sapiens GN=ROR2 PE=1 SV=2	20.2545	17	31	17	2	0	943	104.7	2.0338e-08	-0.175618	0.164138	-0.0915646	1.87172e-08	0.056897	6.2046e-06	0.339755	0.0840533	-0.255702	0	0	0	-0.177611	-0.145048	-0.179177	-0.18411	-0.202527	-0.165234	0.108773	0.132557	0.150492	0.112675	0.18932	0.160979	0.294167	-0.0635193	-0.118921	-0.0922535
D6RFG8	DCK	Deoxycytidine kinase OS=Homo sapiens GN=DCK PE=1 SV=1	49.5268	16	99	16	0	0	317	36.7	2.03599e-08	0.150039	-0.141291	0.0951808	2.20359e-08	0.169808	3.12493e-06	-0.29133	-0.0548584	0.236472	0	0	0	0.117455	0.162107	0.139753	0.165841	0.162541	0.152538	-0.112111	-0.12536	-0.109487	-0.0593431	-0.165285	-0.204457	-0.212992	0.0993017	0.0739766	0.112264
P50453	SERPINB9	Serpin B9 OS=Homo sapiens GN=SERPINB9 PE=1 SV=1	85.1064	28	367	27	25	2	376	42.4	2.03712e-08	0.00242113	-0.141672	0.246306	8.34629e-05	4.121e-06	1.35476e-08	-0.144093	0.243885	0.387977	0	0	1	-0.0183134	0.0203837	-0.0256497	0.00822858	0.0124969	0.0173808	-0.144817	-0.129496	-0.237957	-0.155695	-0.0597886	-0.0902365	-0.173711	0.244492	0.231722	0.262703
O60504	SORBS3	Vinexin OS=Homo sapiens GN=SORBS3 PE=1 SV=2	28.465	20	93	20	0	0	671	75.3	2.05929e-08	0.147103	-0.120318	0.0333309	1.37419e-08	0.00152492	7.99057e-05	-0.267421	-0.113772	0.153649	0	0	0	0.125756	0.137546	0.153433	0.167665	0.16524	0.132977	-0.0907044	-0.111073	-0.0930588	-0.0544108	-0.137494	-0.151279	-0.204207	0.0253728	0.0226928	0.0519272
Q9UJY5	GGA1	ADP-ribosylation factor-binding protein GGA1 OS=Homo sapiens GN=GGA1 PE=1 SV=1	36.4632	20	95	18	0	0	639	70.3	2.095e-08	0.113298	-0.0871471	0.0735869	2.20379e-08	0.14427	3.577e-06	-0.200445	-0.0397112	0.160734	0	0	0	0.129148	0.0922053	0.0901946	0.130478	0.121471	0.116291	-0.081336	-0.0409338	-0.0689692	-0.0939443	-0.109062	-0.149519	-0.0662647	0.0697524	0.0976016	0.0534067
Q8NI08	NCOA7	Nuclear receptor coactivator 7 OS=Homo sapiens GN=NCOA7 PE=1 SV=2	41.0828	29	72	29	1	0	942	106.1	2.09716e-08	0.147562	-0.172212	0.133765	3.7211e-08	0.906605	7.9203e-07	-0.319774	-0.0137971	0.305977	0	0	0	0.127978	0.131921	0.150252	0.161414	0.157603	0.156206	-0.154617	-0.112096	-0.142754	-0.085027	-0.225309	-0.242575	-0.243103	0.161588	0.108524	0.131183
Q16626	MEA1	Male-enhanced antigen 1 OS=Homo sapiens GN=MEA1 PE=1 SV=2	20.5405	3	21	3	3	0	185	19.9	2.09749e-08	-0.210459	0.0870269	-0.00778871	1.44983e-08	1.87628e-05	0.0109271	0.297486	0.20267	-0.0948156	0	0	0	-0.152038	-0.281189	-0.261891	-0.190177	-0.161764	-0.215693	0.118788	0.110996	0.0307928	0.0858255	0.0811429	0.0783073	0.103335	-0.0307736	0.0222275	-0.0148201
P52179	MYOM1	Myomesin-1 OS=Homo sapiens GN=MYOM1 PE=1 SV=2	10.0297	13	18	13	0	0	1685	187.5	2.09753e-08	-0.218321	-0.120214	0.3465	0.0297259	1.78302e-08	1.32175e-07	0.0981061	0.564821	0.466715	0	1	1	-0.217756	-0.275074	-0.284023	-0.208108	-0.192861	-0.132103	-0.162968	-0.127753	-0.200464	-0.0137163	-0.151541	-0.0800588	-0.105	0.321609	0.422617	0.295274
Q8TDB6	DTX3L	E3 ubiquitin-protein ligase DTX3L OS=Homo sapiens GN=DTX3L PE=1 SV=1	39.4595	23	37	23	17	0	740	83.5	2.14738e-08	0.117656	-0.224795	0.205715	1.42337e-07	0.0987053	1.21383e-07	-0.342451	0.0880595	0.43051	0	0	1	0.0690042	0.118726	0.113957	0.0931445	0.126534	0.184568	-0.178938	-0.253773	-0.157503	-0.121153	-0.29273	-0.287317	-0.282151	0.234746	0.171161	0.211238
Q96EI5-2	TCEAL4	Isoform 2 of Transcription elongation factor A protein-like 4 OS=Homo sapiens GN=TCEAL4	41.3408	15	88	11	0	4	358	40.6	2.15218e-08	0.0838054	-0.139578	0.153457	1.85916e-07	0.0470821	9.58133e-08	-0.223384	0.0696511	0.293035	0	0	0	0.0750804	0.0806589	0.0502947	0.117936	0.102	0.0768624	-0.119141	-0.106097	-0.0918686	-0.204504	-0.129862	-0.113504	-0.212071	0.13302	0.153536	0.173813
Q9NQW7-3	XPNPEP1	Isoform 3 of Xaa-Pro aminopeptidase 1 OS=Homo sapiens GN=XPNPEP1	68.018	39	256	39	0	0	666	74.8	2.16808e-08	0.0986226	-0.104821	0.0503261	2.04815e-08	0.0706984	5.82122e-06	-0.203444	-0.0482965	0.155147	0	0	0	0.0822804	0.0992632	0.0914747	0.132445	0.0801067	0.106166	-0.0787728	-0.100454	-0.107633	-0.159308	-0.0673975	-0.08067	-0.139513	0.0495596	0.0242019	0.0772168
Q96A33	CCDC47	Coiled-coil domain-containing protein 47 OS=Homo sapiens GN=CCDC47 PE=1 SV=1	51.9669	25	193	25	0	0	483	55.8	2.18392e-08	-0.197668	0.106651	-0.0858985	1.57285e-08	0.00512902	3.36783e-05	0.304319	0.111769	-0.19255	0	0	0	-0.217864	-0.180245	-0.242087	-0.198303	-0.166909	-0.1806	0.0715722	0.0776687	0.0247747	0.138311	0.10569	0.160669	0.167874	-0.0953004	-0.0565826	-0.105813
Q9P0K7	RAI14	Ankycorbin OS=Homo sapiens GN=RAI14 PE=1 SV=2	65.5102	57	295	57	0	0	980	110	2.24061e-08	-0.0805395	0.0496935	-0.0539288	2.3163e-08	0.131704	4.07862e-06	0.130233	0.0266107	-0.103622	0	0	0	-0.108311	-0.0701531	-0.0884237	-0.0543156	-0.0632103	-0.098823	0.0376776	0.0358838	0.0441859	0.0486563	0.0514655	0.0417153	0.0882701	-0.0541993	-0.0487727	-0.0588144
O00635	TRIM38	E3 ubiquitin-protein ligase TRIM38 OS=Homo sapiens GN=TRIM38 PE=1 SV=1	28.3871	12	26	12	12	0	465	53.4	2.24352e-08	0.233157	-0.221196	0.209345	3.84251e-08	0.866436	9.12792e-07	-0.454353	-0.0238122	0.430541	1	0	1	0.339968	0.202874	0.248497	0.182624	0.18162	0.243359	-0.250631	-0.244524	-0.15827	-0.0797586	-0.262299	-0.290591	-0.262299	0.263546	0.172644	0.191845
A0A0A6YYJ5	MACF1	Microtubule-actin cross-linking factor 1, isoforms 1/2/3/5 OS=Homo sapiens GN=MACF1 PE=1 SV=1	11.843	13	25	12	2	1	1427	150.4	2.25883e-08	-0.270775	0.138546	-0.0897509	1.485e-08	0.0011663	0.00011384	0.409321	0.181024	-0.228297	0	0	0	-0.302011	-0.305796	-0.279608	-0.240268	-0.271265	-0.225701	0.0966116	0.0971688	0.0461299	0.192081	0.156419	0.116296	0.265116	-0.0578838	-0.0909613	-0.120408
Q15126	PMVK	Phosphomevalonate kinase OS=Homo sapiens GN=PMVK PE=1 SV=3	83.8542	17	75	17	17	0	192	22	2.30447e-08	0.297353	-0.249617	0.0444303	1.49134e-08	0.000801389	0.000162947	-0.546971	-0.252923	0.294048	1	0	0	0.270424	0.312295	0.323373	0.275912	0.295297	0.306821	-0.173037	-0.166163	-0.187386	-0.144921	-0.309359	-0.395797	-0.370658	0.036318	0.0476799	0.049293
C9JLB7	OXNAD1	Oxidoreductase NAD-binding domain-containing protein 1 OS=Homo sapiens GN=OXNAD1 PE=1 SV=2	35.7576	11	38	11	0	0	330	36.8	2.355e-08	-0.222321	0.125497	-0.107783	1.81164e-08	0.011645	2.07112e-05	0.347818	0.114538	-0.23328	0	0	0	-0.239339	-0.223303	-0.297221	-0.211829	-0.185071	-0.177164	0.113817	0.0899601	0.0454954	0.184449	0.135382	0.100195	0.209181	-0.103332	-0.0935998	-0.126418
O43852-4	CALU	Isoform 4 of Calumenin OS=Homo sapiens GN=CALU	63.4675	22	331	2	0	0	323	38.1	2.37918e-08	-0.255748	0.132117	-0.170864	2.36291e-08	0.103216	5.08615e-06	0.387865	0.0848843	-0.302981	0	0	0	-0.311248	-0.218445	-0.304037	-0.199626	-0.242133	-0.258999	0.109978	0.0208242	0.0795637	0.167574	0.162195	0.208661	0.176024	-0.206311	-0.159099	-0.14718
Q9UHF7-2	TRPS1	Isoform 2 of Zinc finger transcription factor Trps1 OS=Homo sapiens GN=TRPS1	45.2859	46	123	46	0	0	1294	142.9	2.38363e-08	0.158269	-0.140699	0.086544	2.23867e-08	0.0697089	6.53395e-06	-0.298968	-0.0717248	0.227243	0	0	0	0.15974	0.162706	0.122	0.156641	0.16698	0.181546	-0.128548	-0.0932061	-0.0828975	-0.106389	-0.167922	-0.24944	-0.156492	0.104847	0.0777518	0.0770335
Q14667	KIAA0100	Protein KIAA0100 OS=Homo sapiens GN=KIAA0100 PE=1 SV=3	13.1544	25	37	25	0	0	2235	253.5	2.38634e-08	-0.141823	0.136689	-0.0745117	2.23104e-08	0.0674196	6.682e-06	0.278512	0.0673113	-0.211201	0	0	0	-0.130456	-0.133038	-0.193523	-0.14442	-0.152313	-0.0971879	0.0805416	0.115493	0.121008	0.135639	0.189494	0.110077	0.204575	-0.0394193	-0.076839	-0.107277
O75131	CPNE3	Copine-3 OS=Homo sapiens GN=CPNE3 PE=1 SV=1	54.5624	29	339	28	6	0	537	60.1	2.41353e-08	0.119214	-0.127188	0.0846286	3.03352e-08	0.368985	2.20696e-06	-0.246402	-0.0345855	0.211816	0	0	0	0.0912699	0.113949	0.135631	0.141149	0.120718	0.112568	-0.0773468	-0.105241	-0.143134	-0.100329	-0.108343	-0.137895	-0.218025	0.0683046	0.068488	0.117093
Q9Y3R5	DOPEY2	Protein dopey-2 OS=Homo sapiens GN=DOPEY2 PE=1 SV=5	21.8886	42	92	40	0	1	2298	258.1	2.44927e-08	0.0602752	-0.0540677	0.0109048	1.62777e-08	0.00151248	0.000102092	-0.114343	-0.0493704	0.0649726	0	0	0	0.0376644	0.0670211	0.0561052	0.073062	0.0673277	0.0604711	-0.0669516	-0.0413958	-0.0725311	-0.0663118	-0.028535	-0.0646009	-0.0381479	0.0247266	0.0133343	-0.00534642
P11908-2	PRPS2	Isoform 2 of Ribose-phosphate pyrophosphokinase 2 OS=Homo sapiens GN=PRPS2	63.8629	23	299	9	0	0	321	35	2.56808e-08	0.273543	-0.173891	0.0273008	1.62151e-08	0.000175478	0.000876059	-0.447434	-0.246243	0.201192	1	0	0	0.255538	0.240247	0.288826	0.304067	0.295906	0.256676	-0.130285	-0.135371	-0.134151	-0.0455351	-0.229114	-0.280726	-0.262054	0.0243082	0.0219621	0.0356322
Q8WXI9	GATAD2B	Transcriptional repressor p66-beta OS=Homo sapiens GN=GATAD2B PE=1 SV=1	73.1872	35	199	32	32	3	593	65.2	2.57855e-08	0.162392	-0.153038	0.0517226	1.91078e-08	0.00788775	3.04522e-05	-0.31543	-0.11067	0.20476	0	0	0	0.132961	0.182693	0.15997	0.16642	0.157954	0.174356	-0.106052	-0.079147	-0.0948879	-0.167351	-0.200165	-0.241163	-0.182498	0.0683683	0.0367257	0.0500738
Q9NYY8	FASTKD2	FAST kinase domain-containing protein 2 OS=Homo sapiens GN=FASTKD2 PE=1 SV=1	16.0563	9	20	9	1	0	710	81.4	2.59333e-08	1.01484	-0.5921	-0.840895	7.52558e-08	2.33989e-07	0.337182	-1.60694	-1.85573	-0.248794	1	1	0	0.867508	1.20508	1.19848	0.787669	0.84967	1.18063	-0.978303	-0.497233	-0.307174	-0.574729	-0.429545	-1.00942	-0.348297	-0.957069	-0.60112	-0.964494
Q8IWF6	DENND6A	Protein DENND6A OS=Homo sapiens GN=DENND6A PE=1 SV=1	34.2105	15	49	15	9	0	608	69.5	2.6194e-08	0.17865	-0.059929	0.0528842	1.65425e-08	0.000267205	0.00057374	-0.238579	-0.125766	0.112813	0	0	0	0.168872	0.186568	0.198426	0.17787	0.164461	0.175704	-0.0578992	-0.0163156	-0.0453597	-0.00586289	-0.0892603	-0.141829	-0.062977	0.046012	0.0548857	0.0577549
Q9NRW1	RAB6B	Ras-related protein Rab-6B OS=Homo sapiens GN=RAB6B PE=1 SV=1	60.5769	13	150	5	0	0	208	23.4	2.62367e-08	0.117175	-0.236197	0.275262	4.39921e-07	0.00904171	7.13912e-08	-0.353371	0.158087	0.511458	0	0	1	0.105351	0.14639	0.138527	0.119259	0.0847872	0.108734	-0.186944	-0.200761	-0.191304	-0.101124	-0.347854	-0.300627	-0.324762	0.286151	0.271963	0.26767
Q9UGN5	PARP2	Poly [ADP-ribose] polymerase 2 OS=Homo sapiens GN=PARP2 PE=1 SV=2	54.717	27	134	27	0	0	583	66.2	2.66888e-08	0.123491	-0.0764245	-0.0325545	2.19589e-08	6.27191e-06	0.0907087	-0.199916	-0.156046	0.04387	0	0	0	0.139809	0.100363	0.0799475	0.139208	0.151438	0.130181	-0.074199	-0.0586986	-0.0171055	-0.102027	-0.0797952	-0.102075	-0.101071	-0.047869	-0.0239592	-0.0258352
O00592	PODXL	Podocalyxin OS=Homo sapiens GN=PODXL PE=1 SV=2	28.6738	14	142	14	0	0	558	58.6	2.67692e-08	-0.424778	0.316897	-0.490401	8.12893e-08	0.701511	3.78794e-07	0.741675	-0.0656237	-0.807299	1	0	1	-0.445796	-0.419165	-0.455007	-0.37339	-0.37732	-0.477989	0.220155	0.15953	0.151724	0.225508	0.453695	0.506121	0.501548	-0.501792	-0.457449	-0.511963
Q8N693	ESX1	Homeobox protein ESX1 OS=Homo sapiens GN=ESX1 PE=1 SV=3	4.18719	2	6	1	1	0	406	44.3	2.6788e-08	1.34263	-1.10844	-1.88128	1.61414e-07	1.07564e-07	0.0371284	-2.45106	-3.22391	-0.772849	1	1	1	1.33813	1.27282	1.37831	1.43364	1.28789	1.34498	-1.41879	-1.29976	-0.859871	-2.18175	-0.555698	-0.824317	-0.618863	-1.77036	-2.11767	-1.75582
Q01826-2	SATB1	Isoform 2 of DNA-binding protein SATB1 OS=Homo sapiens GN=SATB1	40.6289	29	131	23	0	6	795	89.1	2.70727e-08	0.355776	-0.345263	0.15471	2.27449e-08	0.0293972	1.31671e-05	-0.701039	-0.201067	0.499972	1	0	1	0.350088	0.34916	0.338256	0.364105	0.375992	0.357057	-0.255213	-0.247597	-0.230605	-0.198775	-0.461782	-0.519146	-0.50372	0.163951	0.140065	0.160113
Q05GC8	BCAR2	Breast cancer anti-estrogen resistance 2 OS=Homo sapiens GN=BCAR2 PE=1 SV=1	25.5738	19	63	19	0	0	1220	134.2	2.72124e-08	0.069689	-0.0811544	0.0199072	2.09361e-08	0.0123831	2.37028e-05	-0.150843	-0.0497818	0.101062	0	0	0	0.0295627	0.0534318	0.0692525	0.0850668	0.0952421	0.085578	-0.092506	-0.0594857	-0.0983965	-0.0956749	-0.0761066	-0.0847352	-0.0611764	0.00808444	0.046053	0.00558424
Q8WYQ5	DGCR8	Microprocessor complex subunit DGCR8 OS=Homo sapiens GN=DGCR8 PE=1 SV=1	40.2329	26	68	26	1	0	773	86	2.75667e-08	-0.231958	0.108668	-0.00598198	1.87064e-08	3.07434e-05	0.00874947	0.340625	0.225976	-0.11465	0	0	0	-0.242514	-0.227096	-0.315335	-0.195584	-0.174607	-0.236609	0.118476	0.124574	0.0480586	0.189265	0.0669422	0.0701383	0.143221	0.0171162	-0.0013969	-0.0336652
Q9H501	ESF1	ESF1 homolog OS=Homo sapiens GN=ESF1 PE=1 SV=1	52.7615	43	218	43	23	0	851	98.7	2.76458e-08	-0.0766692	0.0664633	-0.0879227	8.0402e-08	0.754194	4.16574e-07	0.143133	-0.0112535	-0.154386	0	0	0	-0.104239	-0.06328	-0.0900917	-0.0809304	-0.0512013	-0.0702722	0.0815856	0.0921463	0.0708672	0.101297	0.0467019	0.0387645	0.0338808	-0.0818937	-0.0851715	-0.0967027
Q9NQS1	AVEN	Cell death regulator Aven OS=Homo sapiens GN=AVEN PE=1 SV=1	48.6188	15	72	15	12	0	362	38.5	2.78529e-08	-0.172545	0.101432	-0.0911666	2.28926e-08	0.0243056	1.5436e-05	0.273976	0.081378	-0.192598	0	0	0	-0.233838	-0.136901	-0.186001	-0.150917	-0.163839	-0.163773	0.0727977	0.0755773	0.0446662	0.0812159	0.163414	0.140603	0.131749	-0.0752271	-0.122425	-0.0758476
A0A087X2D5	MRPL45	39S ribosomal protein L45, mitochondrial OS=Homo sapiens GN=MRPL45 PE=1 SV=1	55.5556	15	92	15	0	0	306	35.3	2.80587e-08	0.1652	-0.0600569	-0.109178	1.07544e-07	1.77839e-07	0.149777	-0.225257	-0.274378	-0.049121	0	1	0	0.2067	0.11543	0.144523	0.146553	0.202882	0.175112	-0.0823714	-0.0874289	-0.106195	-0.00847065	-0.0594278	-0.0632778	-0.0132262	-0.079767	-0.111148	-0.136619
Q14257-2	RCN2	Isoform 2 of Reticulocalbin-2 OS=Homo sapiens GN=RCN2	74.9254	22	348	22	1	0	335	39.1	2.84518e-08	-0.176103	0.131624	-0.0852981	2.34861e-08	0.0255136	1.5328e-05	0.307727	0.0908049	-0.216922	0	0	0	-0.200415	-0.161698	-0.192011	-0.171267	-0.154675	-0.176552	0.102585	0.0946032	0.228591	0.201212	0.131203	0.0945246	0.0686479	-0.0915861	-0.0945412	-0.0697669
Q96KB5	PBK	Lymphokine-activated killer T-cell-originated protein kinase OS=Homo sapiens GN=PBK PE=1 SV=3	79.5031	21	351	21	1	0	322	36.1	2.86343e-08	0.250181	-0.179993	0.0525983	1.86244e-08	0.000990738	0.000183317	-0.430174	-0.197583	0.232591	1	0	0	0.232754	0.253121	0.261739	0.259903	0.227474	0.266097	-0.104661	-0.0898708	-0.128411	-0.139038	-0.226488	-0.294217	-0.277263	0.0533981	0.0367546	0.0676421
Q9P0L0-2	VAPA	Isoform 2 of Vesicle-associated membrane protein-associated protein A OS=Homo sapiens GN=VAPA	50.3401	15	314	1	1	36	294	32.6	2.8797e-08	-0.10901	0.0983503	-0.0951737	4.6714e-08	0.799688	1.30592e-06	0.207361	0.0138366	-0.193524	0	0	0	-0.148935	-0.103292	-0.0953815	-0.0845255	-0.104494	-0.117434	0.0662517	0.0807975	0.0392681	0.125921	0.111795	0.15421	0.110209	-0.108737	-0.0773155	-0.099469
Q9H479	FN3K	Fructosamine-3-kinase OS=Homo sapiens GN=FN3K PE=1 SV=1	60.8414	23	128	23	23	0	309	35.1	2.87975e-08	0.0920052	-0.168896	0.195095	3.71168e-07	0.0180406	9.29694e-08	-0.260901	0.103089	0.363991	0	0	1	0.0635565	0.111386	0.0977587	0.114646	0.089554	0.0751298	-0.132778	-0.153122	-0.197019	-0.298375	-0.0991206	-0.138565	-0.163292	0.193779	0.187563	0.203941
Q5T8I3	FAM102B	Protein FAM102B OS=Homo sapiens GN=FAM102B PE=1 SV=2	64.1667	19	33	19	0	0	360	39.3	2.90428e-08	0.213769	-0.237738	0.189024	4.92361e-08	0.860384	1.188e-06	-0.451507	-0.024745	0.426762	1	0	1	0.211676	0.205772	0.245605	0.189006	0.159661	0.270897	-0.202405	-0.158499	-0.143366	-0.243842	-0.254714	-0.403005	-0.258332	0.233364	0.132748	0.20096
Q13884	SNTB1	Beta-1-syntrophin OS=Homo sapiens GN=SNTB1 PE=1 SV=3	36.6171	13	31	11	5	0	538	58	2.90987e-08	0.309367	-0.428984	0.276166	5.11879e-08	0.903949	1.09541e-06	-0.738351	-0.0332008	0.70515	1	0	1	0.255433	0.348629	0.275723	0.318405	0.299649	0.358361	-0.595167	-0.645227	-0.481716	-0.448563	-0.266425	-0.287848	-0.277941	0.28891	0.276399	0.263189
Q15021	NCAPD2	Condensin complex subunit 1 OS=Homo sapiens GN=NCAPD2 PE=1 SV=3	60.9565	75	568	74	24	1	1401	157.1	2.9252e-08	0.110138	-0.0992226	0.0700192	3.13988e-08	0.175951	4.51228e-06	-0.20936	-0.0401186	0.169242	0	0	0	0.0963849	0.117434	0.0917344	0.129543	0.108292	0.117439	-0.0477763	-0.0698047	-0.113544	-0.0547013	-0.140019	-0.119353	-0.14936	0.0632291	0.0650128	0.0818157
O75844	ZMPSTE24	CAAX prenyl protease 1 homolog OS=Homo sapiens GN=ZMPSTE24 PE=1 SV=2	34.3158	17	189	17	17	0	475	54.8	2.96121e-08	-0.210603	0.0744166	-0.0430796	1.89311e-08	0.000105039	0.00199328	0.28502	0.167524	-0.117496	0	0	0	-0.236872	-0.197735	-0.256168	-0.190487	-0.170523	-0.211836	0.0347083	0.0438425	0.00218254	0.104797	0.0930601	0.115783	0.126543	-0.0663539	-0.0165553	-0.0463296
P49366	DHPS	Deoxyhypusine synthase OS=Homo sapiens GN=DHPS PE=1 SV=1	86.4499	23	128	23	0	0	369	40.9	3.04829e-08	0.217229	-0.103225	-0.0503762	2.85288e-08	3.78158e-06	0.243967	-0.320454	-0.267605	0.0528491	0	1	0	0.174466	0.19607	0.222813	0.247302	0.209282	0.253442	-0.107568	-0.0997254	-0.066593	-0.00503212	-0.116922	-0.18441	-0.142327	-0.0219134	-0.0911939	-0.0380214
Q9BX63	BRIP1	Fanconi anemia group J protein OS=Homo sapiens GN=BRIP1 PE=1 SV=1	29.4636	31	63	31	8	0	1249	140.8	3.05609e-08	0.0270927	-0.10898	0.101624	8.38641e-07	0.00318409	6.25022e-08	-0.136073	0.074531	0.210604	0	0	0	0.042009	0.00716556	0.0143899	0.0107733	0.0296493	0.0585692	-0.100414	-0.11329	-0.154183	-0.0813391	-0.147695	-0.092759	-0.0731787	0.119305	0.0965324	0.0890333
Q16795	NDUFA9	NADH dehydrogenase [ubiquinone] 1 alpha subcomplex subunit 9, mitochondrial OS=Homo sapiens GN=NDUFA9 PE=1 SV=2	54.6419	17	110	17	9	0	377	42.5	3.06882e-08	0.145976	-0.124978	0.0913122	3.20001e-08	0.15034	5.27232e-06	-0.270955	-0.0546641	0.21629	0	0	0	0.143157	0.152284	0.123995	0.155029	0.158514	0.14288	-0.172087	-0.183069	-0.12033	-0.036691	-0.13861	-0.158042	-0.0660172	0.0860384	0.0807598	0.107138
Q9UI36	DACH1	Dachshund homolog 1 OS=Homo sapiens GN=DACH1 PE=1 SV=3	23.0263	19	80	16	0	3	760	78.6	3.10354e-08	0.0297495	-0.183165	0.265257	1.19056e-05	5.06259e-05	2.71468e-08	-0.212915	0.235508	0.448422	0	0	1	0.00344216	0.0495713	0.00111009	0.00886049	0.0465368	0.0689763	-0.14623	-0.104986	-0.17447	-0.111912	-0.205244	-0.254988	-0.284326	0.284639	0.267144	0.243989
F8VXC8	SMARCC2	SWI/SNF complex subunit SMARCC2 OS=Homo sapiens GN=SMARCC2 PE=1 SV=1	42.7309	57	399	2	0	58	1245	136.1	3.10467e-08	0.0493316	-0.144632	0.115448	3.05552e-07	0.0372841	1.2215e-07	-0.193964	0.0661165	0.260081	0	0	0	0.040606	0.0647053	0.0273225	0.0730046	0.0622874	0.028064	-0.131493	-0.125598	-0.107653	-0.0930035	-0.165429	-0.223878	-0.165373	0.10335	0.13841	0.104584
A0A088AWN2	WDR20	WD repeat-containing protein 20 OS=Homo sapiens GN=WDR20 PE=1 SV=1	23.8562	11	29	11	0	0	612	67.4	3.10702e-08	0.100876	-0.111788	0.144118	1.58135e-07	0.218664	2.25892e-07	-0.212664	0.0432414	0.255906	0	0	0	0.0667533	0.118078	0.0842262	0.104211	0.0771211	0.154869	-0.165792	-0.130243	-0.128625	-0.0573064	-0.11676	-0.0944115	-0.089378	0.176141	0.101134	0.155078
P28161	GSTM2	Glutathione S-transferase Mu 2 OS=Homo sapiens GN=GSTM2 PE=1 SV=2	75.6881	15	55	8	0	6	218	25.7	3.12705e-08	-0.528582	0.284618	-0.118463	1.98882e-08	0.000459191	0.00043085	0.8132	0.410119	-0.403081	1	1	1	-0.59128	-0.545789	-0.572479	-0.565067	-0.553312	-0.343569	0.447173	0.477915	0.296101	0.301968	0.167456	0.187291	0.114421	-0.0802271	-0.14674	-0.128423
Q16222	UAP1	UDP-N-acetylhexosamine pyrophosphorylase OS=Homo sapiens GN=UAP1 PE=1 SV=3	59.7701	25	149	23	0	0	522	58.7	3.13244e-08	0.218533	-0.127203	-0.00713853	2.10403e-08	4.01006e-05	0.00755885	-0.345736	-0.225672	0.120064	0	0	0	0.193283	0.223747	0.268597	0.21443	0.174448	0.236696	-0.0695764	-0.0574888	-0.0863805	-0.225732	-0.129437	-0.160339	-0.161463	-0.00465349	-0.0406447	0.0238826
Q96DA6	DNAJC19	Mitochondrial import inner membrane translocase subunit TIM14 OS=Homo sapiens GN=DNAJC19 PE=1 SV=3	68.1034	10	73	10	0	0	116	12.5	3.18179e-08	-0.0498859	0.0798349	-0.149369	2.55378e-06	0.0004397	4.14698e-08	0.129721	-0.0994833	-0.229204	0	0	0	-0.0268336	-0.0516478	-0.0170113	-0.0561162	-0.0636722	-0.0840341	0.0556335	0.064092	0.0636137	0.142729	0.0845875	0.0839509	0.0642381	-0.148045	-0.127241	-0.172822
Q8N5A5-2	ZGPAT	Isoform 2 of Zinc finger CCCH-type with G patch domain-containing protein OS=Homo sapiens GN=ZGPAT	48.3366	18	53	18	0	0	511	55.5	3.191e-08	-0.148617	0.0666103	-0.0785852	2.48e-08	0.0147571	2.54912e-05	0.215227	0.0700314	-0.145195	0	0	0	-0.166933	-0.139578	-0.187337	-0.129832	-0.12384	-0.144179	0.0574316	0.0860096	0.0216073	0.0363318	0.0902701	0.0461685	0.128453	-0.0639251	-0.0743329	-0.0974975
Q9BTT0	ANP32E	Acidic leucine-rich nuclear phosphoprotein 32 family member E OS=Homo sapiens GN=ANP32E PE=1 SV=1	47.0149	10	485	7	0	3	268	30.7	3.2717e-08	0.252445	-0.188773	0.00583461	2.0748e-08	0.000183383	0.00122171	-0.441218	-0.246611	0.194607	1	0	0	0.237872	0.240145	0.262417	0.322996	0.22425	0.226992	-0.187794	-0.123264	-0.129786	-0.0754453	-0.242884	-0.271827	-0.290408	-0.000720496	0.00535055	0.0128738
Q96F07-2	CYFIP2	Isoform 2 of Cytoplasmic FMR1-interacting protein 2 OS=Homo sapiens GN=CYFIP2	43.6552	49	306	22	0	0	1253	145.6	3.29085e-08	0.121017	-0.126537	0.16308	1.43311e-07	0.327527	2.8497e-07	-0.247554	0.0420626	0.289617	0	0	0	0.110909	0.108596	0.0902998	0.136911	0.113991	0.165398	-0.125044	-0.107998	-0.129989	-0.0212491	-0.16855	-0.185819	-0.147108	0.168133	0.154286	0.16682
Q9BTV5	FSD1	Fibronectin type III and SPRY domain-containing protein 1 OS=Homo sapiens GN=FSD1 PE=1 SV=1	58.4677	24	79	24	1	0	496	55.8	3.30309e-08	0.131183	-0.160558	0.115204	5.59608e-08	0.863234	1.34036e-06	-0.291742	-0.0159794	0.275762	0	0	0	0.103718	0.122043	0.122023	0.147938	0.129622	0.161756	-0.116497	-0.0964164	-0.125317	-0.132261	-0.192556	-0.224129	-0.236733	0.140564	0.0670204	0.138028
Q9UPW6	SATB2	DNA-binding protein SATB2 OS=Homo sapiens GN=SATB2 PE=1 SV=2	36.1528	22	69	16	0	0	733	82.5	3.46467e-08	0.254241	-0.142403	-0.0929013	3.6141e-08	2.78846e-06	0.442151	-0.396645	-0.347143	0.0495019	0	1	0	0.232886	0.254774	0.231966	0.254572	0.27544	0.27581	-0.163292	-0.133473	-0.182577	-0.286227	-0.0458051	-0.132846	-0.0526026	-0.0864227	-0.0915559	-0.100725
Q96N67-2	DOCK7	Isoform 2 of Dedicator of cytokinesis protein 7 OS=Homo sapiens GN=DOCK7	46.7356	92	403	83	0	12	2129	241.3	3.56455e-08	-0.0417206	0.0422713	-0.0593528	1.86476e-07	0.208187	2.49624e-07	0.083992	-0.0176322	-0.101624	0	0	0	-0.0444117	-0.0519131	-0.0468549	-0.0249275	-0.0246885	-0.0575282	0.0241704	0.02653	0.0336362	0.067154	0.0465019	0.0430384	0.0548684	-0.0664503	-0.0584944	-0.0531137
P53801	PTTG1IP	Pituitary tumor-transforming gene 1 protein-interacting protein OS=Homo sapiens GN=PTTG1IP PE=1 SV=1	20	4	18	4	0	0	180	20.3	3.61633e-08	-0.249566	0.138932	-0.104385	2.59296e-08	0.00606302	5.66641e-05	0.388498	0.145181	-0.243317	0	0	0	-0.262734	-0.285984	-0.253759	-0.22751	-0.221919	-0.245487	0.133077	0.0694603	0.0972064	0.260074	0.0503226	0.156986	0.205396	-0.124259	-0.0705029	-0.118394
Q9UNF1	MAGED2	Melanoma-associated antigen D2 OS=Homo sapiens GN=MAGED2 PE=1 SV=2	57.5908	32	351	31	1	1	606	64.9	3.62677e-08	-0.366235	0.211247	-0.205036	3.10576e-08	0.0387637	1.54268e-05	0.577481	0.161199	-0.416283	1	0	1	-0.405886	-0.356094	-0.404305	-0.347014	-0.333247	-0.350862	0.213583	0.195854	0.11612	0.0129667	0.310781	0.34944	0.279985	-0.211506	-0.211214	-0.192387
P19367-3	HK1	Isoform 3 of Hexokinase-1 OS=Homo sapiens GN=HK1	57.1118	58	493	51	0	9	921	102.7	3.64318e-08	-0.141198	0.0700695	-0.0154414	2.34324e-08	0.000110081	0.00263989	0.211267	0.125756	-0.0855109	0	0	0	-0.15446	-0.124719	-0.156013	-0.13762	-0.128721	-0.145654	0.0336402	0.00515154	0.0514492	0.0966808	0.0894523	0.0948185	0.119294	-0.0296338	-0.00722109	-0.00946941
Q9BQL6	FERMT1	Fermitin family homolog 1 OS=Homo sapiens GN=FERMT1 PE=1 SV=1	50.8124	31	128	29	0	0	677	77.4	3.66601e-08	0.169036	-0.15813	0.1009	3.75502e-08	0.141362	6.66167e-06	-0.327166	-0.0681355	0.25903	0	0	0	0.170621	0.161876	0.144775	0.165928	0.181473	0.189542	-0.130503	-0.142312	-0.115321	-0.0543018	-0.203778	-0.237798	-0.222896	0.106086	0.071619	0.124996
Q32P28	LEPRE1	Prolyl 3-hydroxylase 1 OS=Homo sapiens GN=LEPRE1 PE=1 SV=2	61.9565	33	188	33	3	0	736	83.3	3.6697e-08	-0.132268	0.152416	-0.10989	5.69468e-08	0.742076	1.81889e-06	0.284684	0.0223771	-0.262307	0	0	0	-0.161517	-0.108871	-0.136076	-0.121489	-0.153197	-0.112455	0.103956	0.0697537	0.119581	0.211959	0.161955	0.186069	0.213641	-0.0883359	-0.149355	-0.0919805
A3KN83-2	SBNO1	Isoform 2 of Protein strawberry notch homolog 1 OS=Homo sapiens GN=SBNO1	57.3276	63	214	1	0	74	1392	154.1	3.67506e-08	0.101253	-0.0984823	0.0479892	3.23917e-08	0.0494083	1.33391e-05	-0.199736	-0.0532642	0.146472	0	0	0	0.0950782	0.0737161	0.0582713	0.130722	0.128137	0.121596	-0.0844952	-0.0490843	-0.10121	-0.0725988	-0.12441	-0.133492	-0.124086	0.0496715	0.0451683	0.0491279
Q08378	GOLGA3	Golgin subfamily A member 3 OS=Homo sapiens GN=GOLGA3 PE=1 SV=2	70.0935	89	355	89	4	0	1498	167.3	3.77704e-08	-0.127351	0.0741436	-0.0231476	2.39955e-08	0.000420646	0.000623738	0.201495	0.104204	-0.0972912	0	0	0	-0.145936	-0.140202	-0.154485	-0.0998025	-0.0987256	-0.124956	0.0795896	0.0722342	0.0279013	0.0283949	0.0943278	0.101232	0.115325	-0.0105917	-0.0256283	-0.0332226
Q8N392	ARHGAP18	Rho GTPase-activating protein 18 OS=Homo sapiens GN=ARHGAP18 PE=1 SV=3	66.6667	45	150	45	4	0	663	74.9	3.78476e-08	0.0627115	-0.13296	0.171547	1.07098e-06	0.00333229	7.5613e-08	-0.195671	0.108836	0.304507	0	0	0	0.0431892	0.0506565	0.0483193	0.0648374	0.083818	0.0854487	-0.145293	-0.15097	-0.191889	-0.195292	-0.0633354	-0.0997439	-0.084196	0.161361	0.188726	0.164555
Q8N9V3	WDSUB1	WD repeat, SAM and U-box domain-containing protein 1 OS=Homo sapiens GN=WDSUB1 PE=1 SV=3	53.5714	17	52	17	0	0	476	52.8	3.80289e-08	0.124292	-0.135347	0.0567148	3.40378e-08	0.0564635	1.27006e-05	-0.259638	-0.0675769	0.192061	0	0	0	0.099698	0.142727	0.10147	0.124915	0.140001	0.136939	-0.168861	-0.0935442	-0.149082	-0.0553711	-0.121259	-0.206651	-0.152658	0.0828287	0.0426863	0.0446293
P49407	ARRB1	Beta-arrestin-1 OS=Homo sapiens GN=ARRB1 PE=1 SV=2	62.9187	17	65	15	0	0	418	47	3.81725e-08	0.135788	-0.128054	0.0634793	3.30778e-08	0.0436235	1.51311e-05	-0.263842	-0.072309	0.191533	0	0	0	0.123997	0.132776	0.111949	0.119312	0.131478	0.195217	-0.120364	-0.117006	-0.188451	-0.0532013	-0.107164	-0.167816	-0.142373	0.0770303	0.0253551	0.0880524
Q5THK1	PRR14L	Protein PRR14L OS=Homo sapiens GN=PRR14L PE=1 SV=1	36.8666	59	119	58	0	1	2151	237.2	3.81825e-08	0.0646316	-0.0897047	0.120732	4.16736e-07	0.030603	1.37358e-07	-0.154336	0.0561009	0.210437	0	0	0	0.0593442	0.080183	0.0197253	0.0449858	0.0820352	0.101516	-0.0740985	-0.0766933	-0.0705875	-0.143111	-0.0939738	-0.0914314	-0.0780371	0.152501	0.108844	0.100853
Q8N5U6-2	RNF10	Isoform 2 of RING finger protein 10 OS=Homo sapiens GN=RNF10	25	16	47	16	0	0	816	90.4	3.89628e-08	-0.078705	0.144694	-0.166827	4.94689e-07	0.0210692	1.25436e-07	0.223399	-0.0881221	-0.311521	0	0	0	-0.12079	-0.084268	-0.119202	-0.0289875	-0.0499028	-0.0690793	0.219906	0.188283	0.0913909	0.130805	0.151056	0.118273	0.113145	-0.133101	-0.183523	-0.183856
P14324	FDPS	Farnesyl pyrophosphate synthase OS=Homo sapiens GN=FDPS PE=1 SV=4	36.7542	14	145	14	0	0	419	48.2	3.90385e-08	-0.0249979	0.111004	-0.196824	2.82758e-05	3.00817e-05	3.06825e-08	0.136002	-0.171826	-0.307828	0	0	0	-0.0523879	-0.0215189	0.0297556	-0.00730117	-0.0634449	-0.03509	0.169947	0.0874993	0.0947319	0.118554	0.126098	0.124942	0.0552579	-0.170837	-0.237783	-0.181851
Q9UKT5	FBXO4	F-box only protein 4 OS=Homo sapiens GN=FBXO4 PE=1 SV=2	29.199	9	16	9	0	0	387	44.1	3.92535e-08	0.253032	-0.222657	0.13421	3.6049e-08	0.0693547	1.14949e-05	-0.475689	-0.118823	0.356867	1	0	0	0.255508	0.236941	0.265533	0.315526	0.242068	0.202619	-0.332422	-0.251994	-0.10017	-0.0992393	-0.204195	-0.269652	-0.300926	0.100314	0.162231	0.140084
B7ZLQ5	SMARCA1	Probable global transcription activator SNF2L1 OS=Homo sapiens GN=SMARCA1 PE=1 SV=1	63.1776	83	655	5	0	103	1070	124.2	3.94795e-08	-0.0950819	0.0337156	0.0211689	4.46183e-08	2.40157e-06	0.61075	0.128797	0.116251	-0.0125466	0	0	0	-0.109032	-0.111735	-0.122039	-0.0844719	-0.0628043	-0.0804087	0.0285876	0.0473581	0.00384029	0.043427	0.0302265	0.0359202	0.0466492	0.0132931	0.0420004	0.0082133
Q9H9J2	MRPL44	39S ribosomal protein L44, mitochondrial OS=Homo sapiens GN=MRPL44 PE=1 SV=1	51.8072	15	94	15	15	0	332	37.5	3.95091e-08	0.169171	-0.10208	-0.139718	1.06394e-07	3.87029e-07	0.431368	-0.271252	-0.30889	-0.0376383	0	1	0	0.147531	0.150381	0.163656	0.166023	0.200941	0.186497	-0.177942	-0.145465	-0.0829188	-0.156013	-0.0635293	-0.0581007	-0.030592	-0.152066	-0.103298	-0.163791
O94991	SLITRK5	SLIT and NTRK-like protein 5 OS=Homo sapiens GN=SLITRK5 PE=2 SV=2	15.5532	10	19	10	1	0	958	107.4	3.97887e-08	0.149322	0.148824	-0.492748	0.999927	8.27002e-08	6.23578e-08	-0.000498931	-0.64207	-0.641572	0	1	1	0.124723	0.122483	0.114834	0.178097	0.17675	0.179048	0.149219	0.17061	0.259151	0.268284	0.0567007	5.19002e-05	0.137749	-0.392908	-0.566315	-0.519021
Q86TI0	TBC1D1	TBC1 domain family member 1 OS=Homo sapiens GN=TBC1D1 PE=1 SV=2	35.7877	35	71	34	0	0	1168	133	3.98123e-08	0.171352	-0.133742	-0.0503811	2.96525e-08	1.75921e-05	0.037439	-0.305094	-0.221733	0.0833613	0	0	0	0.168007	0.104737	0.160348	0.176685	0.212613	0.205722	-0.183104	-0.0871883	-0.0584214	-0.163955	-0.117704	-0.202574	-0.12325	-0.043311	-0.0405703	-0.067262
Q9Y315	DERA	Deoxyribose-phosphate aldolase OS=Homo sapiens GN=DERA PE=1 SV=2	76.4151	20	131	20	0	0	318	35.2	3.98607e-08	0.0742135	-0.0792649	0.0974038	1.58694e-07	0.41299	3.80754e-07	-0.153478	0.0231903	0.176669	0	0	0	0.0600132	0.0900886	0.0495911	0.0731968	0.0816863	0.0907049	-0.0884728	-0.0743861	-0.106466	-0.116433	-0.0325164	-0.0445731	-0.0920075	0.0745379	0.100053	0.11762
K7EJH8	ACTN4	Alpha-actinin-4 (Fragment) OS=Homo sapiens GN=ACTN4 PE=1 SV=1	74.7253	15	233	1	1	0	182	21.4	4.01148e-08	-0.209894	0.126786	-0.0966384	3.06029e-08	0.0133618	3.61324e-05	0.33668	0.113255	-0.223424	0	0	0	-0.252203	-0.161658	-0.230649	-0.199265	-0.191035	-0.224552	0.139209	0.153201	0.0419727	0.200776	0.121562	0.185674	0.0451067	-0.117506	-0.0918162	-0.0805933
Q5T280	C9orf114	Putative methyltransferase C9orf114 OS=Homo sapiens GN=C9orf114 PE=1 SV=3	42.8191	16	71	16	9	0	376	42	4.14579e-08	-0.11119	0.0716628	-0.100776	6.95642e-08	0.857919	1.68981e-06	0.182853	0.0104134	-0.172439	0	0	0	-0.121217	-0.0956692	-0.125496	-0.125952	-0.090724	-0.108082	0.130651	0.101851	0.0596692	0.0192644	0.08218	0.0650709	0.0429533	-0.082992	-0.116447	-0.10289
Q9NRY4	ARHGAP35	Rho GTPase-activating protein 35 OS=Homo sapiens GN=ARHGAP35 PE=1 SV=3	51.3009	61	205	60	25	1	1499	170.4	4.20466e-08	0.0728525	-0.0938314	0.052103	5.5643e-08	0.484204	3.15352e-06	-0.166684	-0.0207495	0.145934	0	0	0	0.0636732	0.0716096	0.0449455	0.0947079	0.0886342	0.0735446	-0.0812066	-0.0775007	-0.0981082	-0.158694	-0.0613965	-0.0756068	-0.104307	0.0447902	0.0457016	0.0658174
Q8IZ40	RCOR2	REST corepressor 2 OS=Homo sapiens GN=RCOR2 PE=1 SV=2	50.0956	19	74	18	18	0	523	58	4.20558e-08	-0.321241	0.22383	-0.174284	3.68356e-08	0.0493285	1.55829e-05	0.545071	0.146957	-0.398114	1	0	1	-0.325462	-0.34578	-0.355621	-0.292254	-0.271415	-0.336914	0.362558	0.345166	0.291486	0.223289	0.11665	0.105496	0.122164	-0.187065	-0.160951	-0.174836
Q9NYL2-2	ZAK	Isoform 2 of Mitogen-activated protein kinase kinase kinase MLT OS=Homo sapiens GN=ZAK	32.5275	14	51	2	2	0	455	51.5	4.31124e-08	0.128786	-0.185831	0.0854256	5.4608e-08	0.414609	3.67478e-06	-0.314617	-0.0433601	0.271257	0	0	0	0.0726467	0.165509	0.168582	0.0924287	0.0930122	0.180535	-0.181106	-0.189146	-0.266492	-0.237689	-0.146053	-0.129916	-0.15042	0.10874	0.050188	0.0973484
Q6STE5	SMARCD3	SWI/SNF-related matrix-associated actin-dependent regulator of chromatin subfamily D member 3 OS=Homo sapiens GN=SMARCD3 PE=1 SV=1	60.6625	28	135	17	0	0	483	55	4.40391e-08	0.151829	-0.170066	0.129787	7.08073e-08	0.802756	1.9737e-06	-0.321895	-0.0220419	0.299853	0	0	0	0.166638	0.0857225	0.103288	0.167333	0.163044	0.224946	-0.202617	-0.230917	-0.0687698	-0.177077	-0.195408	-0.144664	-0.171009	0.16736	0.110717	0.111283
Q96I51	WBSCR16	Williams-Beuren syndrome chromosomal region 16 protein OS=Homo sapiens GN=WBSCR16 PE=1 SV=2	58.8362	20	64	20	1	0	464	50	4.46022e-08	-0.183261	0.0919787	-0.0599082	2.94002e-08	0.00165611	0.000215331	0.275239	0.123352	-0.151887	0	0	0	-0.195481	-0.194226	-0.211298	-0.178989	-0.168972	-0.150598	0.0456158	0.0398177	0.0476544	0.158402	0.0884733	0.0969315	0.166957	-0.0430962	-0.0680305	-0.0685979
O95235	KIF20A	Kinesin-like protein KIF20A OS=Homo sapiens GN=KIF20A PE=1 SV=1	63.7079	48	310	48	0	0	890	100.2	4.5245e-08	-0.157475	0.0746465	0.034065	4.13694e-08	6.04239e-06	0.227149	0.232122	0.19154	-0.0405815	0	0	0	-0.208952	-0.126225	-0.194711	-0.164568	-0.145356	-0.105041	0.0917762	0.108782	0.0543315	0.0801656	0.0116624	0.0707487	0.105059	0.0345457	0.0380909	0.0295584
Q9UQB8-4	BAIAP2	Isoform 4 of Brain-specific angiogenesis inhibitor 1-associated protein 2 OS=Homo sapiens GN=BAIAP2	69.8656	31	106	31	0	0	521	57.3	4.54943e-08	-0.113092	0.0909885	-0.0575263	3.96144e-08	0.0484345	1.72613e-05	0.20408	0.0555655	-0.148515	0	0	0	-0.0939922	-0.136771	-0.147046	-0.112013	-0.088312	-0.100417	0.0872603	0.0499131	0.106087	0.0384973	0.0894811	0.120967	0.144713	-0.0533245	-0.0573975	-0.0618568
Q16566	CAMK4	Calcium/calmodulin-dependent protein kinase type IV OS=Homo sapiens GN=CAMK4 PE=1 SV=1	49.6829	19	35	18	16	0	473	51.9	4.56421e-08	0.262578	-0.250056	0.14888	4.50711e-08	0.119676	9.45943e-06	-0.512635	-0.113699	0.398936	1	0	1	0.24626	0.267183	0.253803	0.259312	0.277141	0.271771	-0.136186	-0.150718	-0.186425	-0.190813	-0.338123	-0.39432	-0.353808	0.182271	0.107951	0.156416
Q8N2F6	ARMC10	Armadillo repeat-containing protein 10 OS=Homo sapiens GN=ARMC10 PE=1 SV=1	66.4723	16	97	3	0	17	343	37.5	4.61169e-08	-0.0847678	0.0957387	-0.121419	2.3216e-07	0.239116	3.31812e-07	0.180506	-0.0366515	-0.217158	0	0	0	-0.12019	-0.0805233	-0.0883607	-0.0760343	-0.0974153	-0.0460836	0.106618	0.108881	0.100535	0.15548	0.0670298	0.0312354	0.100391	-0.117787	-0.118908	-0.127563
Q6XQN6	NAPRT	Nicotinate phosphoribosyltransferase OS=Homo sapiens GN=NAPRT PE=1 SV=2	71.7472	30	171	30	0	0	538	57.5	4.61206e-08	0.0948534	-0.0930872	0.106355	1.23576e-07	0.851658	7.63399e-07	-0.187941	0.0115012	0.199442	0	0	0	0.081446	0.0876817	0.104116	0.102438	0.0870463	0.106393	-0.11399	-0.137231	-0.143134	-0.0470312	-0.0466245	-0.0963393	-0.0672606	0.128222	0.0792715	0.111571
Q16836	HADH	Hydroxyacyl-coenzyme A dehydrogenase, mitochondrial OS=Homo sapiens GN=HADH PE=1 SV=3	67.1975	19	254	19	0	0	314	34.3	4.63093e-08	0.112971	-0.149775	0.119392	1.0654e-07	0.973799	9.90614e-07	-0.262745	0.00642179	0.269167	0	0	0	0.0776462	0.138136	0.0951332	0.118037	0.121317	0.127554	-0.104894	-0.112191	-0.101649	-0.102058	-0.189829	-0.212669	-0.225132	0.108807	0.136586	0.112784
Q96N46	TTC14	Tetratricopeptide repeat protein 14 OS=Homo sapiens GN=TTC14 PE=1 SV=1	22.5974	16	28	16	1	0	770	88.3	4.65119e-08	-0.132647	0.0740589	0.00386857	3.16206e-08	5.0022e-05	0.0109609	0.206706	0.136516	-0.0701903	0	0	0	-0.137642	-0.152565	-0.159791	-0.134603	-0.141471	-0.0698111	0.0802041	0.0907597	0.0737833	0.10791	0.0318196	0.0334536	0.100482	0.0211153	-0.0057588	-0.00375077
Q13011	ECH1	Delta(3,5)-Delta(2,4)-dienoyl-CoA isomerase, mitochondrial OS=Homo sapiens GN=ECH1 PE=1 SV=2	70.7317	19	390	19	5	0	328	35.8	4.67292e-08	0.0284587	-0.121466	0.174463	9.52771e-06	0.000145094	4.62964e-08	-0.149924	0.146004	0.295928	0	0	0	0.0105887	0.0404888	0.017073	0.0320699	0.0358128	0.034719	-0.0829303	-0.0866676	-0.109337	-0.218269	-0.101904	-0.12158	-0.129572	0.1624	0.214812	0.146176
P08962	CD63	CD63 antigen OS=Homo sapiens GN=CD63 PE=1 SV=2	24.3697	5	41	5	0	0	238	25.6	4.68793e-08	-0.245917	0.095165	-0.0653199	2.97962e-08	0.000399267	0.000910179	0.341082	0.180597	-0.160485	0	0	0	-0.273736	-0.237253	-0.223373	-0.201605	-0.253298	-0.286236	0.112287	0.0773834	0.0125082	0.118403	0.0834459	0.170495	0.0916331	-0.133489	-0.0786847	0.0162136
Q8N0X7	SPG20	Spartin OS=Homo sapiens GN=SPG20 PE=1 SV=1	46.6967	29	184	28	28	1	666	72.8	4.73866e-08	0.155187	-0.134702	0.0861706	4.4844e-08	0.0913395	1.18177e-05	-0.289889	-0.0690165	0.220873	0	0	0	0.160783	0.168212	0.15912	0.143535	0.147101	0.152372	-0.0739359	-0.0964239	-0.044637	-0.195749	-0.166615	-0.186591	-0.178963	0.0883715	0.0727577	0.0973825
Q13415	ORC1	Origin recognition complex subunit 1 OS=Homo sapiens GN=ORC1 PE=1 SV=2	29.849	20	36	20	20	0	861	97.3	4.79457e-08	-0.144459	0.126304	-0.0771539	4.41905e-08	0.0761345	1.35267e-05	0.270762	0.0673047	-0.203458	0	0	0	-0.139716	-0.200046	-0.17118	-0.153217	-0.103637	-0.0989552	0.0932235	0.173294	0.0469552	0.137933	0.142152	0.157178	0.133391	-0.0456298	-0.0818041	-0.104028
Q9BYG3	NIFK	MKI67 FHA domain-interacting nucleolar phosphoprotein OS=Homo sapiens GN=NIFK PE=1 SV=1	58.3618	16	203	16	3	0	293	34.2	4.81728e-08	-0.182042	0.0826478	-0.0189209	3.14731e-08	9.93688e-05	0.00472387	0.26469	0.163121	-0.101569	0	0	0	-0.227762	-0.155216	-0.206999	-0.184078	-0.158491	-0.159705	0.0890746	0.0788791	0.0304074	0.15726	0.0178733	0.0956773	0.109362	-0.00576164	-0.015026	-0.0359752
Q9UI09	NDUFA12	NADH dehydrogenase [ubiquinone] 1 alpha subcomplex subunit 12 OS=Homo sapiens GN=NDUFA12 PE=1 SV=1	60	8	57	8	5	0	145	17.1	4.8314e-08	0.243624	-0.17329	0.0496954	3.14685e-08	0.0012781	0.000303591	-0.416914	-0.193929	0.222985	0	0	0	0.213817	0.19803	0.313243	0.252422	0.239793	0.24444	-0.280914	-0.154068	-0.140818	-0.122329	-0.101456	-0.281081	-0.132362	0.0789172	0.0697566	0.000412533
Q9NXR5	ANKRD10	Ankyrin repeat domain-containing protein 10 OS=Homo sapiens GN=ANKRD10 PE=1 SV=2	30.7143	7	11	5	3	3	420	44.7	4.88436e-08	-0.279716	0.133996	0.00927018	3.48641e-08	3.06029e-05	0.0236733	0.413711	0.288986	-0.124725	0	0	0	-0.292423	-0.253627	-0.32459	-0.336074	-0.314495	-0.157087	0.127345	0.203684	0.0242494	0.149739	0.118485	0.108675	0.205792	0.0202037	-5.52027e-05	0.00766206
Q9NS86	LANCL2	LanC-like protein 2 OS=Homo sapiens GN=LANCL2 PE=1 SV=1	44.4444	15	55	15	15	0	450	50.8	4.89452e-08	-0.125613	0.0845203	-0.00544747	3.12692e-08	0.000203179	0.00204641	0.210134	0.120166	-0.0899678	0	0	0	-0.1288	-0.122213	-0.178216	-0.097914	-0.110135	-0.116401	0.0617278	0.116777	0.03649	0.136092	0.0972731	0.079362	0.0639203	-0.0129982	0.0137953	-0.0171395
Q7L099-3	RUFY3	Isoform 3 of Protein RUFY3 OS=Homo sapiens GN=RUFY3	35.8065	22	54	4	0	20	620	70.6	4.92538e-08	-0.121306	0.0992755	-0.113584	8.96014e-08	0.945593	1.65593e-06	0.220582	0.00772193	-0.21286	0	0	0	-0.178121	-0.129417	-0.123592	-0.0837354	-0.107335	-0.105636	0.118273	0.115692	0.0791199	0.167351	0.0856989	0.0883762	0.0404185	-0.0972238	-0.132221	-0.111308
Q9H6R4	NOL6	Nucleolar protein 6 OS=Homo sapiens GN=NOL6 PE=1 SV=2	56.2827	55	273	55	0	0	1146	127.5	4.98092e-08	-0.126365	0.103246	-0.113402	8.36116e-08	0.864064	1.99823e-06	0.22961	0.0129624	-0.216648	0	0	0	-0.0975914	-0.172142	-0.143735	-0.119872	-0.122036	-0.102812	0.0675348	0.0813074	0.0927934	0.1839	0.0820252	0.0689012	0.146257	-0.0942682	-0.127922	-0.118016
Q9BVJ6	UTP14A	U3 small nucleolar RNA-associated protein 14 homolog A OS=Homo sapiens GN=UTP14A PE=1 SV=1	61.3489	43	315	29	6	17	771	87.9	5.00454e-08	-0.144981	0.0642327	-0.0178035	3.25237e-08	0.000116658	0.00411341	0.209214	0.127178	-0.0820362	0	0	0	-0.157162	-0.135984	-0.177008	-0.157166	-0.108179	-0.134388	0.0858786	0.0714377	0.0488349	0.103252	-0.00166669	0.0409327	0.100959	-0.0138167	-0.0111451	-0.0284488
K4DI93	CUL4B	Cullin 4B, isoform CRA_e OS=Homo sapiens GN=CUL4B PE=1 SV=1	63.1111	58	439	44	1	16	900	102.7	5.01436e-08	0.0514749	-0.104408	0.0987396	4.04496e-07	0.0724661	2.27067e-07	-0.155883	0.0472647	0.203147	0	0	0	0.028977	0.0765597	0.0489506	0.0665114	0.0571276	0.0307229	-0.0725287	-0.0732888	-0.0989289	-0.164937	-0.0859377	-0.0898713	-0.145363	0.0946396	0.105776	0.0958029
Q96JQ2	CLMN	Calmin OS=Homo sapiens GN=CLMN PE=1 SV=1	5.98802	5	6	5	5	0	1002	111.6	5.01744e-08	0.25806	-0.432109	0.122757	5.3205e-08	0.187275	7.72284e-06	-0.690169	-0.135304	0.554865	1	0	1	0.28141	0.115746	0.169899	0.342058	0.240178	0.399071	-0.316935	-0.333047	-0.376161	-0.634305	-0.42586	-0.47902	-0.459432	0.127507	0.192939	0.0478235
P13674-2	P4HA1	Isoform 2 of Prolyl 4-hydroxylase subunit alpha-1 OS=Homo sapiens GN=P4HA1	62.5468	34	227	2	0	40	534	60.9	5.02524e-08	-0.16576	0.147479	-0.200528	1.6658e-07	0.613281	6.02226e-07	0.313239	-0.0347684	-0.348008	0	0	1	-0.198404	-0.15457	-0.196845	-0.129115	-0.135111	-0.180515	0.110697	0.0716825	0.0481988	0.202163	0.18753	0.212387	0.199697	-0.201635	-0.178681	-0.221269
Q9BWH2	FUNDC2	FUN14 domain-containing protein 2 OS=Homo sapiens GN=FUNDC2 PE=1 SV=2	39.6825	6	35	6	5	0	189	20.7	5.06222e-08	-0.242982	0.0919023	-0.03288	3.33673e-08	8.73865e-05	0.00603215	0.334884	0.210102	-0.124782	0	0	0	-0.259554	-0.214008	-0.269301	-0.260892	-0.216023	-0.238114	0.0584877	0.0715022	0.00695187	0.212182	0.0582797	0.107167	0.128746	-0.0281961	-0.0141125	-0.0563314
P51148-2	RAB5C	Isoform 2 of Ras-related protein Rab-5C OS=Homo sapiens GN=RAB5C	69.0763	13	455	10	0	5	249	27	5.06573e-08	-0.0702323	0.0441852	-0.000742961	3.29133e-08	0.000118824	0.00410052	0.114417	0.0694893	-0.0449282	0	0	0	-0.0847108	-0.0592388	-0.0923866	-0.057853	-0.0548154	-0.0723889	0.0396043	0.0519568	0.0135486	0.0574816	0.0545738	0.0537174	0.0384139	-0.0181897	0.0214233	-0.0054624
Q14680	MELK	Maternal embryonic leucine zipper kinase OS=Homo sapiens GN=MELK PE=1 SV=3	44.086	23	80	22	0	0	651	74.6	5.24436e-08	0.105917	-0.145762	0.185286	4.47861e-07	0.0633954	2.25714e-07	-0.251679	0.0793687	0.331048	0	0	0	0.0553686	0.0793562	0.0772433	0.10704	0.139217	0.177276	-0.155338	-0.117204	-0.160507	-0.087681	-0.171514	-0.219251	-0.10884	0.226243	0.139237	0.190376
F8WB74	SEPW1	Selenoprotein W OS=Homo sapiens GN=SEPW1 PE=1 SV=1	48.8636	4	12	4	0	0	88	9.5	5.26869e-08	0.168299	-0.17339	0.0809484	4.77362e-08	0.0693862	1.60079e-05	-0.341689	-0.0873508	0.254339	0	0	0	0.135316	0.186596	0.166758	0.190176	0.184834	0.146114	-0.150266	-0.185808	-0.259577	-0.165307	-0.0831273	-0.11802	-0.251627	0.038073	0.0714949	0.133277
Q969V5	MUL1	Mitochondrial ubiquitin ligase activator of NFKB 1 OS=Homo sapiens GN=MUL1 PE=1 SV=1	44.0341	11	24	11	11	0	352	39.8	5.29488e-08	-0.163374	0.0907454	-0.0676858	3.79158e-08	0.00715077	8.11023e-05	0.254119	0.0956882	-0.158431	0	0	0	-0.223383	-0.160394	-0.160852	-0.189854	-0.151045	-0.0947154	0.0814498	0.111405	0.0623571	0.0818366	0.0669174	0.0665745	0.164677	-0.0747993	-0.0537819	-0.074476
P29590-11	PML	Isoform PML-11 of Protein PML OS=Homo sapiens GN=PML	39.9281	34	128	3	0	0	834	92.5	5.33351e-08	0.154244	-0.168112	0.115936	7.18515e-08	0.528398	3.72097e-06	-0.322357	-0.0383084	0.284048	0	0	0	0.126471	0.223385	0.142236	0.16258	0.138671	0.132121	-0.158585	-0.256258	-0.215166	-0.100032	-0.225147	-0.119539	-0.102061	0.114889	0.10875	0.124169
O14920	IKBKB	Inhibitor of nuclear factor kappa-B kinase subunit beta OS=Homo sapiens GN=IKBKB PE=1 SV=1	57.5397	34	79	33	0	1	756	86.5	5.34632e-08	0.146972	-0.129891	0.0417591	3.80966e-08	0.00673004	8.60412e-05	-0.276863	-0.105213	0.17165	0	0	0	0.168704	0.116135	0.102867	0.193584	0.153287	0.147255	-0.107992	-0.0715035	-0.0970419	-0.0948704	-0.149754	-0.181584	-0.206492	0.0431019	0.0467782	0.0353973
Q8N5C1	FAM26E	Protein FAM26E OS=Homo sapiens GN=FAM26E PE=2 SV=1	15.534	3	5	3	3	0	309	35.1	5.36773e-08	-0.49072	0.384474	-0.452029	9.42421e-08	0.915552	1.9352e-06	0.875194	0.0386907	-0.836504	1	0	1	-0.347718	-0.627839	-0.672029	-0.440443	-0.318088	-0.538202	0.472494	0.326174	0.299221	0.311611	0.313853	0.42136	0.546607	-0.498867	-0.234811	-0.622409
P11586	MTHFD1	C-1-tetrahydrofolate synthase, cytoplasmic OS=Homo sapiens GN=MTHFD1 PE=1 SV=3	75.4011	66	1224	57	2	13	935	101.5	5.38331e-08	0.0889304	-0.0794054	0.0632603	6.50306e-08	0.355657	5.21368e-06	-0.168336	-0.0256701	0.142666	0	0	0	0.061978	0.0994548	0.0721233	0.107027	0.111163	0.081836	-0.0552278	-0.0439173	-0.0553755	-0.0680509	-0.0962995	-0.107006	-0.129961	0.0529106	0.0751104	0.06176
Q8NB37	PDDC1	Parkinson disease 7 domain-containing protein 1 OS=Homo sapiens GN=PDDC1 PE=1 SV=1	60	9	50	9	0	0	220	23.3	5.38935e-08	0.142584	-0.116538	0.0594491	4.23888e-08	0.0209123	3.75513e-05	-0.259122	-0.0831351	0.175987	0	0	0	0.108122	0.111075	0.126618	0.152441	0.166892	0.190357	-0.0370588	-0.0895399	-0.141968	-0.166332	-0.140064	-0.149509	-0.0912928	0.0597492	0.0775861	0.0410119
Q99741	CDC6	Cell division control protein 6 homolog OS=Homo sapiens GN=CDC6 PE=1 SV=1	41.9643	23	61	23	15	0	560	62.7	5.3923e-08	-0.22991	0.134366	-0.0871878	3.78126e-08	0.00540576	0.000103279	0.364276	0.142722	-0.221554	0	0	0	-0.183674	-0.260783	-0.302414	-0.270048	-0.196992	-0.165547	0.158989	0.184269	0.0800641	0.038077	0.12733	0.161435	0.1904	-0.0633974	-0.117121	-0.0810447
A0A087WX37	ITGA4	Integrin alpha-4 OS=Homo sapiens GN=ITGA4 PE=1 SV=1	29.6724	26	100	25	0	0	1038	115.3	5.40392e-08	0.141757	-0.14555	0.135613	1.03474e-07	0.979774	1.62041e-06	-0.287307	-0.00614368	0.281163	0	0	0	0.128627	0.158884	0.149632	0.108574	0.126006	0.178817	-0.183194	-0.125396	-0.150952	-0.0258519	-0.181719	-0.212419	-0.13932	0.162874	0.116014	0.12795
P55268	LAMB2	Laminin subunit beta-2 OS=Homo sapiens GN=LAMB2 PE=1 SV=2	38.9878	52	112	51	47	0	1798	195.9	5.44962e-08	0.043345	-0.124405	0.186341	6.27329e-06	0.000352469	6.24715e-08	-0.16775	0.142996	0.310745	0	0	0	0.0183098	0.0546357	0.0236671	0.0239377	0.0426831	0.0968365	-0.173362	-0.129784	-0.126265	-0.156091	-0.123674	-0.133821	-0.0278346	0.189988	0.159795	0.209239
Q27J81-2	INF2	Isoform 2 of Inverted formin-2 OS=Homo sapiens GN=INF2	52.5806	48	186	47	1	1	1240	134.5	5.47701e-08	0.122668	-0.0969082	0.0792078	5.7765e-08	0.185781	8.53133e-06	-0.219577	-0.0434606	0.176116	0	0	0	0.128626	0.121095	0.118049	0.148796	0.105024	0.114421	-0.082114	-0.0386481	-0.0501036	-0.0952999	-0.139571	-0.154662	-0.117958	0.10106	0.0487711	0.0877924
Q14696	MESDC2	LDLR chaperone MESD OS=Homo sapiens GN=MESDC2 PE=1 SV=2	54.7009	14	227	14	12	0	234	26.1	5.53006e-08	-0.187313	0.132525	-0.120827	5.67223e-08	0.159091	9.60235e-06	0.319838	0.0664863	-0.253351	0	0	0	-0.205344	-0.195022	-0.244303	-0.150788	-0.138225	-0.190196	0.0975077	0.0647716	0.0562705	0.199551	0.14281	0.178203	0.188559	-0.117385	-0.103	-0.142095
Q9HBM1	SPC25	Kinetochore protein Spc25 OS=Homo sapiens GN=SPC25 PE=1 SV=1	54.0179	14	101	14	7	0	224	26.1	5.66771e-08	0.129256	-0.188668	0.159574	1.75125e-07	0.69655	7.44448e-07	-0.317924	0.0303188	0.348243	0	0	0	0.103857	0.148472	0.102994	0.133705	0.14963	0.136876	-0.0926301	-0.111757	-0.138845	-0.207159	-0.257035	-0.236309	-0.276942	0.144848	0.158036	0.175839
Q9ULW0	TPX2	Targeting protein for Xklp2 OS=Homo sapiens GN=TPX2 PE=1 SV=2	68.1392	53	362	51	1	1	747	85.6	5.71485e-08	-0.0893016	0.0476959	-0.0220214	3.67465e-08	0.000901437	0.000534683	0.136997	0.0672802	-0.0697173	0	0	0	-0.120439	-0.0753038	-0.108316	-0.070704	-0.065637	-0.09541	0.0754293	0.0708994	0.027831	0.030666	0.0428528	0.034635	0.051558	-0.0160647	-0.0121075	-0.037892
Q5T5X7	BEND3	BEN domain-containing protein 3 OS=Homo sapiens GN=BEND3 PE=1 SV=1	64.7343	41	133	41	41	0	828	94.4	5.76287e-08	-0.154544	0.0728367	0.00997408	4.27919e-08	2.53286e-05	0.0411297	0.227381	0.164518	-0.0628627	0	0	0	-0.160661	-0.1456	-0.184781	-0.172353	-0.123922	-0.139949	0.0435849	0.0782066	-0.00233512	0.0808544	0.0912371	0.0922212	0.126088	0.0259259	0.0270535	-0.0230571
Q9BRP8	WIBG	Partner of Y14 and mago OS=Homo sapiens GN=WIBG PE=1 SV=1	68.1373	13	86	13	0	0	204	22.6	5.79011e-08	-0.183712	0.114686	-0.0836161	4.434e-08	0.0164221	4.86925e-05	0.298398	0.100096	-0.198302	0	0	0	-0.218751	-0.162533	-0.183917	-0.182321	-0.156582	-0.198167	0.105291	0.090117	0.00626608	0.197032	0.143349	0.148872	0.111875	-0.0594162	-0.0990448	-0.0923872
Q96EK6	GNPNAT1	Glucosamine 6-phosphate N-acetyltransferase OS=Homo sapiens GN=GNPNAT1 PE=1 SV=1	78.2609	14	84	14	0	0	184	20.7	5.80651e-08	0.20594	-0.0736394	0.0175574	4.01571e-08	4.98705e-05	0.0159658	-0.279579	-0.188382	0.0911969	0	0	0	0.170528	0.237783	0.199177	0.20724	0.183958	0.236952	0.00159724	-0.075069	-0.065127	-0.135458	-0.0673644	-0.0345731	-0.139482	0.0154514	-0.0141617	0.0513826
O60447-2	EVI5	Isoform 2 of Ecotropic viral integration site 5 protein homolog OS=Homo sapiens GN=EVI5	29.7199	25	51	23	0	2	821	94.1	5.81218e-08	0.0881519	-0.0688715	0.0606262	6.5467e-08	0.264115	7.06585e-06	-0.157023	-0.0275257	0.129498	0	0	0	0.0636844	0.0903373	0.0911188	0.10189	0.0825931	0.0992877	-0.0645878	-0.0816669	-0.072753	-0.0187973	-0.0539865	-0.120545	-0.0697643	0.0826653	0.0456564	0.0535569
Q14258	TRIM25	E3 ubiquitin/ISG15 ligase TRIM25 OS=Homo sapiens GN=TRIM25 PE=1 SV=2	71.5873	39	265	39	39	0	630	70.9	5.84449e-08	0.135981	-0.137764	0.109932	8.53068e-08	0.666925	3.25226e-06	-0.273745	-0.0260494	0.247696	0	0	0	0.120338	0.144397	0.107488	0.150067	0.135591	0.158006	-0.105791	-0.105577	-0.101136	-0.0594553	-0.171466	-0.201361	-0.219561	0.112548	0.11054	0.106707
Q9BS26	ERP44	Endoplasmic reticulum resident protein 44 OS=Homo sapiens GN=ERP44 PE=1 SV=1	62.5616	23	236	22	22	0	406	46.9	5.86131e-08	-0.0868728	0.0976213	-0.0663546	8.0972e-08	0.576088	3.77868e-06	0.184494	0.0205182	-0.163976	0	0	0	-0.0735739	-0.0855552	-0.0755548	-0.0855329	-0.114392	-0.0866281	0.0659116	0.051349	0.0823464	0.170247	0.0950035	0.106088	0.112403	-0.0526387	-0.0821901	-0.064235
P55317	FOXA1	Hepatocyte nuclear factor 3-alpha OS=Homo sapiens GN=FOXA1 PE=1 SV=2	24.7881	5	19	5	0	0	472	49.1	5.86912e-08	0.273334	-0.231091	0.277358	1.25979e-07	0.99725	1.39907e-06	-0.504425	0.00402335	0.508448	1	0	1	0.270681	0.263367	0.260224	0.318248	0.213314	0.314171	-0.178011	-0.171886	-0.0696314	-0.404547	-0.23008	-0.297694	-0.265787	0.352697	0.235531	0.243844
P54764	EPHA4	Ephrin type-A receptor 4 OS=Homo sapiens GN=EPHA4 PE=1 SV=1	45.3347	31	96	27	0	5	986	109.8	5.87642e-08	-0.1593	0.0573214	0.0332696	6.37702e-08	3.95892e-06	0.549689	0.216621	0.192569	-0.0240518	0	0	0	-0.150956	-0.182092	-0.199621	-0.171511	-0.137716	-0.113901	0.0253507	0.072982	0.0149275	0.101172	0.0466283	0.0381669	0.102022	0.0551353	0.0421019	0.00257153
O95715	CXCL14	C-X-C motif chemokine 14 OS=Homo sapiens GN=CXCL14 PE=1 SV=2	7.20721	1	2	1	0	0	111	13.1	5.95165e-08	-0.301693	0.317946	-0.676164	2.07749e-06	0.00276529	1.05633e-07	0.619639	-0.37447	-0.99411	1	1	1	-0.215937	-0.370846	-0.477066	-0.262891	-0.23217	-0.25125	0.11759	0.225572	0.159317	0.396283	0.497799	0.341821	0.48724	-0.711722	-0.583526	-0.733244
O15151	MDM4	Protein Mdm4 OS=Homo sapiens GN=MDM4 PE=1 SV=2	17.9592	7	12	7	0	0	490	54.8	5.95237e-08	0.373352	-0.252673	0.0674113	3.83266e-08	0.000968117	0.000528893	-0.626025	-0.305941	0.320084	1	1	0	0.375048	0.381894	0.370333	0.357091	0.359771	0.395976	-0.27883	-0.351668	-0.255635	0.022511	-0.382296	-0.281684	-0.241109	0.0739102	0.0393781	0.0889455
O43805	SSNA1	Sjoegren syndrome nuclear autoantigen 1 OS=Homo sapiens GN=SSNA1 PE=1 SV=2	62.1849	11	62	11	5	0	119	13.6	6.07608e-08	0.148082	-0.180215	0.107012	8.01213e-08	0.501027	4.45264e-06	-0.328297	-0.04107	0.287227	0	0	0	0.13521	0.112368	0.10658	0.193252	0.200912	0.140167	-0.112239	-0.0995357	-0.131023	-0.262876	-0.218422	-0.227579	-0.209833	0.106505	0.111947	0.102583
P26374	CHML	Rab proteins geranylgeranyltransferase component A 2 OS=Homo sapiens GN=CHML PE=1 SV=2	44.6646	23	80	19	19	0	656	74	6.07969e-08	0.293479	-0.171596	0.009759	3.96269e-08	0.000132035	0.00482597	-0.465076	-0.28372	0.181355	1	1	0	0.305091	0.314568	0.266106	0.315897	0.301786	0.257429	-0.0662941	-0.0722186	-0.112805	-0.138975	-0.273509	-0.291245	-0.246128	0.00783297	0.00507717	0.0163669
P26885	FKBP2	Peptidyl-prolyl cis-trans isomerase FKBP2 OS=Homo sapiens GN=FKBP2 PE=1 SV=2	61.9718	6	71	6	2	0	142	15.6	6.10361e-08	-0.170952	0.0942655	-0.0643938	4.22943e-08	0.00482276	0.00013278	0.265218	0.106558	-0.158659	0	0	0	-0.201676	-0.179372	-0.172092	-0.139791	-0.171963	-0.160817	0.073574	0.054473	0.0636732	0.0409642	0.105457	0.132829	0.188888	-0.0538807	-0.049801	-0.0894997
Q13576	IQGAP2	Ras GTPase-activating-like protein IQGAP2 OS=Homo sapiens GN=IQGAP2 PE=1 SV=4	62.7937	88	492	84	1	0	1575	180.5	6.11706e-08	0.150032	-0.31686	0.322835	6.77187e-07	0.0347359	2.12821e-07	-0.466892	0.172803	0.639695	1	0	1	0.125964	0.167821	0.163952	0.171296	0.136808	0.134353	-0.236921	-0.232359	-0.23678	-0.172039	-0.409749	-0.446238	-0.483936	0.316943	0.329542	0.322022
Q9UPU5	USP24	Ubiquitin carboxyl-terminal hydrolase 24 OS=Homo sapiens GN=USP24 PE=1 SV=3	47.0992	95	340	93	93	1	2620	294.2	6.22373e-08	0.0909864	-0.0547659	0.0215492	4.03386e-08	0.00124267	0.000444157	-0.145752	-0.0694372	0.0763151	0	0	0	0.0678747	0.0853914	0.0806828	0.111426	0.0996568	0.100887	-0.0335098	-0.0134677	-0.0400867	-0.0904676	-0.0581721	-0.0706823	-0.0769752	0.0242027	0.0120311	0.0284137
Q9UK59	DBR1	Lariat debranching enzyme OS=Homo sapiens GN=DBR1 PE=1 SV=2	47.6103	22	95	22	5	0	544	61.5	6.23555e-08	0.0657081	-0.0637853	0.070818	1.51925e-07	0.937089	1.18087e-06	-0.129493	0.00510981	0.134603	0	0	0	0.0280091	0.0846062	0.051014	0.0613931	0.0847724	0.084454	-0.0447984	-0.04759	-0.060246	-0.10982	-0.0604658	-0.0689996	-0.0545775	0.0771722	0.0619834	0.0732983
Q8NI60	ADCK3	Atypical kinase ADCK3, mitochondrial OS=Homo sapiens GN=ADCK3 PE=1 SV=1	38.949	23	95	23	2	0	647	71.9	6.23951e-08	0.435033	-0.277348	-0.0447477	4.31546e-08	5.32265e-05	0.0164567	-0.712381	-0.47978	0.2326	1	1	0	0.418717	0.426771	0.485114	0.501515	0.397561	0.380516	-0.208209	-0.179534	-0.111376	-0.170206	-0.39456	-0.504358	-0.373193	-0.0198887	-0.0534162	-0.0609381
P37287	PIGA	Phosphatidylinositol N-acetylglucosaminyltransferase subunit A OS=Homo sapiens GN=PIGA PE=1 SV=1	29.9587	12	25	12	1	0	484	54.1	6.26015e-08	-0.173878	0.107502	-0.100382	5.59864e-08	0.0669326	1.99245e-05	0.281379	0.0734954	-0.207884	0	0	0	-0.201438	-0.183876	-0.150598	-0.192788	-0.174216	-0.140351	0.048924	0.0643939	0.0468118	0.148966	0.122755	0.13275	0.187911	-0.0853988	-0.0793333	-0.136415
A0A0A0MR51	FADS1	Fatty acid desaturase 1 OS=Homo sapiens GN=FADS1 PE=1 SV=1	36.5269	14	63	13	3	0	501	57.8	6.31264e-08	-0.16723	0.0991094	-0.0081214	4.08489e-08	0.000165482	0.00388937	0.266339	0.159109	-0.107231	0	0	0	-0.20521	-0.15959	-0.20323	-0.15403	-0.131405	-0.149914	0.0355354	0.0474722	0.0798754	0.126006	0.109146	0.121522	0.174209	-0.0076778	0.012296	-0.0289824
Q9NZJ9	NUDT4	Diphosphoinositol polyphosphate phosphohydrolase 2 OS=Homo sapiens GN=NUDT4 PE=1 SV=2	69.4444	10	119	1	0	13	180	20.3	6.36612e-08	0.212768	-0.17405	0.0198548	4.08445e-08	0.000851694	0.00065957	-0.386818	-0.192913	0.193905	0	0	0	0.218918	0.164508	0.213405	0.260105	0.221826	0.197846	-0.14226	-0.0743025	-0.124205	-0.135273	-0.194412	-0.279268	-0.268628	0.00918804	0.0420039	0.00837248
A0A0A0MT30	AKR1C1	Aldo-keto reductase family 1 member C1 OS=Homo sapiens GN=AKR1C1 PE=1 SV=1	30.5556	7	19	4	0	0	324	37.1	6.42418e-08	-0.24959	-0.273281	0.580352	0.916017	1.60805e-07	8.62376e-08	-0.0236915	0.829942	0.853634	0	1	1	-0.223887	-0.255321	-0.36858	-0.184925	-0.274734	-0.19009	-0.462888	-0.269814	-0.322845	-0.416733	-0.0590465	-0.178541	-0.203101	0.541065	0.637372	0.56262
O00154	ACOT7	Cytosolic acyl coenzyme A thioester hydrolase OS=Homo sapiens GN=ACOT7 PE=1 SV=3	59.7368	20	492	20	0	0	380	41.8	6.46009e-08	0.0633291	-0.0466047	0.0501417	8.66202e-08	0.532421	4.48608e-06	-0.109934	-0.0131874	0.0967464	0	0	0	0.0464607	0.0819669	0.0358632	0.0583221	0.0748991	0.0824625	-0.0595628	-0.0315553	-0.0399853	-0.0397085	-0.0398644	-0.036286	-0.0792707	0.0431874	0.0477961	0.0594417
P26639	TARS	Threonine--tRNA ligase, cytoplasmic OS=Homo sapiens GN=TARS PE=1 SV=3	70.2628	55	805	49	0	8	723	83.4	6.46309e-08	0.0861805	-0.0335152	-0.0135678	6.03417e-08	7.63735e-06	0.276479	-0.119696	-0.0997483	0.0199474	0	0	0	0.0707498	0.093553	0.0722523	0.0917047	0.0945413	0.0942821	-0.0195078	-0.0166542	-0.031604	-0.0314609	-0.0353391	-0.0223438	-0.0776967	-0.0232127	-0.0291319	0.0116412
Q9UBB5	MBD2	Methyl-CpG-binding domain protein 2 OS=Homo sapiens GN=MBD2 PE=1 SV=1	47.6886	14	48	12	4	0	411	43.2	6.46754e-08	0.18523	-0.256665	0.104443	7.12303e-08	0.242287	8.42428e-06	-0.441895	-0.0807872	0.361108	1	0	0	0.230723	0.131001	0.104533	0.212213	0.238803	0.194109	-0.254251	-0.183858	-0.136804	-0.309891	-0.281916	-0.35959	-0.270342	0.0503506	0.182599	0.080379
Q96B49	TOMM6	Mitochondrial import receptor subunit TOM6 homolog OS=Homo sapiens GN=TOMM6 PE=1 SV=1	32.4324	3	44	3	3	0	74	8	6.47281e-08	-0.178727	0.125537	-0.124011	7.19172e-08	0.252997	8.16859e-06	0.304264	0.054716	-0.249548	0	0	0	-0.198766	-0.223372	-0.166142	-0.184414	-0.1881	-0.111564	0.0942411	0.0759625	0.0522959	0.184123	0.143556	0.12443	0.204154	-0.0913039	-0.153832	-0.126896
Q96JB3	HIC2	Hypermethylated in cancer 2 protein OS=Homo sapiens GN=HIC2 PE=1 SV=2	28.2927	12	33	11	0	1	615	66.1	6.56105e-08	-0.262087	0.174563	-0.173149	6.80759e-08	0.17767	1.06864e-05	0.43665	0.0889383	-0.347711	1	0	1	-0.290304	-0.290768	-0.329093	-0.237495	-0.204733	-0.220129	0.269589	0.173377	0.0392121	0.101673	0.150938	0.230941	0.256207	-0.171632	-0.14162	-0.206195
Q9HD23-4	MRS2	Isoform 4 of Magnesium transporter MRS2 homolog, mitochondrial OS=Homo sapiens GN=MRS2	21.9731	8	11	8	0	0	446	50.6	6.66811e-08	-0.270973	0.147833	-0.18717	6.98829e-08	0.188532	1.04255e-05	0.418806	0.0838025	-0.335004	0	0	0	-0.35836	-0.192521	-0.297263	-0.324313	-0.259024	-0.194356	0.111475	0.144163	0.0238368	0.15104	0.197404	0.16184	0.245074	-0.185051	-0.202618	-0.173843
Q05639	EEF1A2	Elongation factor 1-alpha 2 OS=Homo sapiens GN=EEF1A2 PE=1 SV=1	70.8423	25	4304	12	12	6	463	50.4	6.66827e-08	0.269341	-0.130716	0.154632	5.62768e-08	0.0433787	2.889e-05	-0.400057	-0.11471	0.285347	0	0	0	0.342462	0.312066	0.238408	0.209699	0.247905	0.265508	-0.16366	-0.142378	0.0272978	-0.135951	-0.151608	-0.1335	-0.215211	0.149598	0.169094	0.145203
O15020	SPTBN2	Spectrin beta chain, non-erythrocytic 2 OS=Homo sapiens GN=SPTBN2 PE=1 SV=3	60.3766	136	603	120	0	0	2390	271.2	7.03893e-08	-0.188374	0.112551	-0.0514281	4.63069e-08	0.00198009	0.000343058	0.300925	0.136946	-0.163979	0	0	0	-0.205644	-0.178506	-0.215903	-0.185077	-0.182164	-0.162953	0.0551706	0.0627874	0.051603	0.109751	0.139164	0.151476	0.217904	-0.0305768	-0.0661737	-0.0575338
O75052	NOS1AP	Carboxyl-terminal PDZ ligand of neuronal nitric oxide synthase protein OS=Homo sapiens GN=NOS1AP PE=1 SV=3	17.9842	8	19	8	0	0	506	56.1	7.05443e-08	0.102812	-0.162	0.0976606	1.3569e-07	0.983967	2.05058e-06	-0.264812	-0.00515184	0.25966	0	0	0	0.0390973	0.0575311	0.0830908	0.149907	0.141017	0.146232	-0.14094	-0.238053	-0.136811	-0.167246	-0.182269	-0.158967	-0.10971	0.0787758	0.12793	0.0862757
P51692	STAT5B	Signal transducer and activator of transcription 5B OS=Homo sapiens GN=STAT5B PE=1 SV=2	51.9695	36	154	34	5	2	787	89.8	7.29507e-08	0.126171	-0.113235	0.058252	6.19877e-08	0.0475337	3.00532e-05	-0.239407	-0.0679194	0.171487	0	0	0	0.113139	0.115484	0.156056	0.146959	0.125682	0.0997089	-0.0997485	-0.0782346	-0.106651	-0.0452497	-0.108002	-0.167483	-0.187279	0.0579128	0.0606371	0.0562061
O14545	TRAFD1	TRAF-type zinc finger domain-containing protein 1 OS=Homo sapiens GN=TRAFD1 PE=1 SV=1	57.0447	22	99	22	8	0	582	64.8	7.58283e-08	-0.1327	0.0325449	-0.0136401	5.61001e-08	3.33978e-05	0.0435756	0.165245	0.11906	-0.0461849	0	0	0	-0.12549	-0.168728	-0.163341	-0.119572	-0.101788	-0.117281	0.0409761	0.0692665	0.0251955	-0.0164472	0.0490766	0.0253116	0.034435	-0.0093837	-0.0177566	-0.0137799
Q9ULW2	FZD10	Frizzled-10 OS=Homo sapiens GN=FZD10 PE=1 SV=1	2.40964	1	2	1	1	0	581	65.3	7.58739e-08	-0.679647	0.13092	0.336887	3.35006e-07	3.91428e-07	0.123537	0.810568	1.01653	0.205967	1	1	0	-0.752885	-0.576336	-0.884356	-0.617384	-0.51882	-0.728101	0.13547	0.0672761	-0.17662	0.102273	0.213715	0.314265	0.260063	0.296764	0.419483	0.294414
Q13445	TMED1	Transmembrane emp24 domain-containing protein 1 OS=Homo sapiens GN=TMED1 PE=1 SV=1	19.3833	4	20	4	2	0	227	25.2	7.61258e-08	-0.251706	0.12142	-0.145025	6.43783e-08	0.0464827	3.20587e-05	0.373126	0.106681	-0.266445	0	0	0	-0.297337	-0.24109	-0.227104	-0.260737	-0.239318	-0.244649	0.0700136	0.0655525	0.0442677	0.267477	0.161955	0.0805536	0.160122	-0.137448	-0.140296	-0.157331
Q9Y2R4	DDX52	Probable ATP-dependent RNA helicase DDX52 OS=Homo sapiens GN=DDX52 PE=1 SV=3	66.1102	31	170	30	19	0	599	67.5	7.63309e-08	-0.0749331	0.0878385	-0.0380047	7.43782e-08	0.128084	1.58487e-05	0.162772	0.0369285	-0.125843	0	0	0	-0.112529	-0.0678977	-0.104392	-0.0827178	-0.0587542	-0.0233088	0.0750552	0.0767984	0.088916	0.123003	0.073753	0.0850354	0.0923085	-0.0394879	-0.0153914	-0.0591347
Q3ZCQ8-2	TIMM50	Isoform 2 of Mitochondrial import inner membrane translocase subunit TIM50 OS=Homo sapiens GN=TIMM50	35.0877	20	107	20	0	0	456	50.4	7.66997e-08	-0.0989661	0.0670355	-0.0998548	1.62371e-07	0.998812	1.83659e-06	0.166002	-0.000888678	-0.16689	0	0	0	-0.139445	-0.11265	-0.107044	-0.0453199	-0.0758543	-0.113484	0.0692478	0.0532083	0.0467632	0.0453694	0.0962846	0.0720667	0.0863085	-0.0944588	-0.131158	-0.0739477
P56192	MARS	Methionine--tRNA ligase, cytoplasmic OS=Homo sapiens GN=MARS PE=1 SV=2	60.2222	52	571	52	5	0	900	101.1	7.72637e-08	0.0972514	-0.0291979	-0.0122095	7.84906e-08	6.41421e-06	0.43594	-0.126449	-0.109461	0.0169884	0	0	0	0.0982466	0.0986297	0.0726511	0.118644	0.0969114	0.0984257	-0.00647544	-0.026273	0.0115829	-0.0459852	-0.0446801	-0.0587995	-0.033755	-0.023536	-0.00988467	-0.00320798
P05161	ISG15	Ubiquitin-like protein ISG15 OS=Homo sapiens GN=ISG15 PE=1 SV=5	42.4242	6	19	6	0	0	165	17.9	7.83153e-08	-0.104723	0.188103	-0.166876	4.05717e-07	0.241243	5.29156e-07	0.292826	-0.062153	-0.354979	0	0	1	-0.146073	-0.122212	-0.153627	-0.0721991	-0.0547531	-0.0794732	0.108631	0.181441	0.109076	0.174509	0.269146	0.23552	0.238396	-0.131262	-0.18248	-0.186885
P21397	MAOA	Amine oxidase [flavin-containing] A OS=Homo sapiens GN=MAOA PE=1 SV=1	42.315	20	73	20	3	0	527	59.6	7.8342e-08	0.168409	-0.200007	0.167416	1.60628e-07	0.999698	1.98995e-06	-0.368417	-0.000993064	0.367424	0	0	1	0.132297	0.182113	0.166605	0.18141	0.160501	0.187531	-0.18673	-0.182107	-0.14063	-0.0650092	-0.245954	-0.331285	-0.248334	0.166779	0.147752	0.187718
Q7Z434	MAVS	Mitochondrial antiviral-signaling protein OS=Homo sapiens GN=MAVS PE=1 SV=2	61.6667	19	132	19	2	0	540	56.5	7.9408e-08	-0.132242	0.0847919	-0.0217443	5.08584e-08	0.000833922	0.000925006	0.217034	0.110498	-0.106536	0	0	0	-0.166661	-0.120137	-0.142428	-0.135442	-0.126434	-0.102352	0.0559798	0.0607355	0.0680864	0.146052	0.0714485	0.0567034	0.134538	0.0159817	-0.0421904	-0.0390243
Q96EU6	RRP36	Ribosomal RNA processing protein 36 homolog OS=Homo sapiens GN=RRP36 PE=1 SV=1	66.7954	20	74	19	1	1	259	29.8	8.06443e-08	-0.132666	0.0612527	-0.0605944	5.82903e-08	0.00992648	0.000106738	0.193919	0.0720719	-0.121847	0	0	0	-0.152498	-0.139383	-0.154357	-0.108353	-0.0970633	-0.144344	0.0454919	0.0286922	0.0292773	0.131285	0.0697839	0.0476605	0.0765778	-0.0723453	-0.0476512	-0.0617868
Q05932	FPGS	Folylpolyglutamate synthase, mitochondrial OS=Homo sapiens GN=FPGS PE=1 SV=3	34.753	15	43	15	0	0	587	64.6	8.15061e-08	-0.195315	0.127535	-0.0905447	6.37571e-08	0.0237925	5.60488e-05	0.32285	0.10477	-0.21808	0	0	0	-0.235623	-0.203208	-0.220955	-0.236085	-0.183717	-0.0922997	0.0849518	0.129932	0.11323	0.174499	0.111003	0.083873	0.195258	-0.0365592	-0.135663	-0.0994119
Q14165	MLEC	Malectin OS=Homo sapiens GN=MLEC PE=1 SV=1	48.2877	17	136	17	3	0	292	32.2	8.1522e-08	-0.165115	0.104451	-0.0286431	5.22628e-08	0.000892337	0.000897429	0.269565	0.136471	-0.133094	0	0	0	-0.210539	-0.161945	-0.178372	-0.117606	-0.162144	-0.160081	0.0957724	0.0545978	0.0336431	0.12502	0.119028	0.110553	0.19254	-0.0389403	-0.02853	-0.0184591
Q08AD1	CAMSAP2	Calmodulin-regulated spectrin-associated protein 2 OS=Homo sapiens GN=CAMSAP2 PE=1 SV=3	33.7139	43	106	43	0	0	1489	168	8.26086e-08	0.110706	-0.079187	0.00283294	5.29254e-08	0.000324347	0.00268773	-0.189893	-0.107873	0.0820199	0	0	0	0.139065	0.0869852	0.0619489	0.116467	0.146582	0.113188	-0.0753196	-0.0890242	-0.0917032	-0.0157397	-0.0978495	-0.0994436	-0.0852289	0.0120588	0.00238921	-0.00594916
A0A0A0MQX8	MBNL1	Muscleblind-like protein 1 OS=Homo sapiens GN=MBNL1 PE=1 SV=1	44.25	18	137	8	0	13	400	43	8.26337e-08	0.239381	-0.228613	0.119692	7.48878e-08	0.0812397	2.37928e-05	-0.467994	-0.119689	0.348306	1	0	0	0.235691	0.227783	0.209389	0.238113	0.264507	0.260803	-0.174456	-0.209041	-0.108158	-0.439932	-0.191376	-0.243566	-0.233766	0.109091	0.127109	0.122877
Q01650	SLC7A5	Large neutral amino acids transporter small subunit 1 OS=Homo sapiens GN=SLC7A5 PE=1 SV=2	16.9625	8	68	7	5	1	507	55	8.34346e-08	-0.125791	0.140293	-0.237809	1.16729e-06	0.0222744	2.42425e-07	0.266084	-0.112019	-0.378103	0	0	1	-0.16266	-0.130795	-0.0969885	-0.125486	-0.125549	-0.113265	0.107704	0.127091	0.0665103	0.260364	0.129453	0.0813947	0.209537	-0.235531	-0.203453	-0.274444
Q8TAE8	GADD45GIP1	Growth arrest and DNA damage-inducible proteins-interacting protein 1 OS=Homo sapiens GN=GADD45GIP1 PE=1 SV=1	59.4595	11	44	11	11	0	222	25.4	8.36502e-08	0.174352	-0.136862	-0.0882831	8.0217e-08	8.62339e-06	0.33529	-0.311214	-0.262635	0.0485785	0	0	0	0.183013	0.143025	0.141639	0.201514	0.198579	0.178343	-0.14403	-0.147046	-0.122651	-0.26223	-0.0940481	-0.126219	-0.0618074	-0.051204	-0.090454	-0.123191
Q92564-3	DCUN1D4	Isoform 3 of DCN1-like protein 4 OS=Homo sapiens GN=DCUN1D4	32.7381	10	35	9	0	1	336	38.4	8.42546e-08	0.11218	-0.149794	0.049544	7.95558e-08	0.108084	1.98981e-05	-0.261974	-0.0626359	0.199338	0	0	0	0.104592	0.112747	0.0719443	0.110705	0.155775	0.117315	-0.107314	-0.144737	-0.147302	-0.0628172	-0.214767	-0.169163	-0.202457	0.0343465	0.0695073	0.0447781
P51784	USP11	Ubiquitin carboxyl-terminal hydrolase 11 OS=Homo sapiens GN=USP11 PE=1 SV=3	55.8671	42	177	40	0	1	963	109.7	8.51463e-08	-0.302652	0.160642	-0.0183434	5.57526e-08	0.000163833	0.00630952	0.463294	0.284309	-0.178985	1	0	0	-0.254314	-0.316548	-0.35746	-0.310319	-0.308888	-0.268386	0.13557	0.104858	0.0910134	0.0352039	0.248786	0.284321	0.224741	-0.00589158	-0.0660472	0.0169087
Q8WXF7	ATL1	Atlastin-1 OS=Homo sapiens GN=ATL1 PE=1 SV=1	42.4731	21	48	20	0	0	558	63.5	8.52942e-08	-0.0159057	-0.184658	0.32874	0.000757046	7.07816e-06	5.49227e-08	-0.168752	0.344645	0.513398	0	1	1	-0.0245214	0.00795621	-0.0625006	-0.0203257	0.00296768	0.000989862	-0.293605	-0.224242	-0.0853909	-0.188246	-0.179574	-0.25961	-0.0619367	0.353792	0.294754	0.337674
Q9P265	DIP2B	Disco-interacting protein 2 homolog B OS=Homo sapiens GN=DIP2B PE=1 SV=3	51.7132	64	294	60	57	4	1576	171.4	8.53243e-08	0.0712754	-0.0448175	0.0120893	5.46622e-08	0.000867844	0.000985091	-0.116093	-0.0591861	0.0569068	0	0	0	0.0511932	0.0690964	0.0604455	0.0942358	0.0793163	0.0733651	-0.0372251	-0.0358438	-0.0273791	-0.0180798	-0.0504617	-0.0771604	-0.0675726	0.0106609	0.0136135	0.0119936
Q86W74	ANKRD46	Ankyrin repeat domain-containing protein 46 OS=Homo sapiens GN=ANKRD46 PE=1 SV=1	26.7241	5	22	5	0	0	232	26	8.56555e-08	-0.196638	0.149728	-0.149566	1.08854e-07	0.463161	6.76385e-06	0.346366	0.0470722	-0.299294	0	0	0	-0.173244	-0.288316	-0.206331	-0.206524	-0.136197	-0.169215	0.0785442	0.119276	0.0926949	0.205078	0.162461	0.138529	0.251516	-0.164036	-0.111289	-0.173372
O95070	YIF1A	Protein YIF1A OS=Homo sapiens GN=YIF1A PE=1 SV=2	10.9215	3	5	3	0	0	293	32	8.57562e-08	-0.263358	0.261546	-0.167685	9.45307e-08	0.258928	1.07988e-05	0.524904	0.0956731	-0.429231	1	0	1	-0.330675	-0.281176	-0.324995	-0.209257	-0.281256	-0.152788	0.174119	0.162196	0.159041	0.273004	0.301959	0.341649	0.418854	-0.194961	-0.135076	-0.173018
Q8NHU6	TDRD7	Tudor domain-containing protein 7 OS=Homo sapiens GN=TDRD7 PE=1 SV=2	44.2623	40	92	40	3	0	1098	123.5	8.62017e-08	0.00436157	-0.0889685	0.128385	7.18073e-05	4.58579e-05	6.56516e-08	-0.0933301	0.124023	0.217353	0	0	0	-0.0235675	-0.00809985	-0.0111096	0.019693	0.033065	0.0161884	-0.10708	-0.0382318	-0.132868	-0.0771636	-0.0685036	-0.112333	-0.0865996	0.125493	0.149663	0.109999
Q13405	MRPL49	39S ribosomal protein L49, mitochondrial OS=Homo sapiens GN=MRPL49 PE=1 SV=1	50.6024	8	50	8	0	0	166	19.2	8.64513e-08	0.162628	-0.0633945	-0.0739764	1.59294e-07	1.50477e-06	0.909338	-0.226023	-0.236604	-0.0105818	0	0	0	0.171006	0.157026	0.11508	0.187812	0.17658	0.168264	-0.0829503	-0.127927	-0.0978184	-0.0211117	-0.081981	-0.0454795	0.0135064	-0.0726653	-0.0862784	-0.0629854
Q96FZ2	HMCES	Embryonic stem cell-specific 5-hydroxymethylcytosine-binding protein OS=Homo sapiens GN=HMCES PE=1 SV=1	61.5819	22	82	22	0	0	354	40.5	8.68053e-08	0.194704	-0.165892	0.073229	6.64062e-08	0.0195647	6.9791e-05	-0.360595	-0.121475	0.239121	0	0	0	0.176134	0.187658	0.202323	0.226989	0.1876	0.18752	-0.0667355	-0.0888337	-0.104056	-0.232809	-0.201566	-0.199109	-0.268132	0.0633333	0.0806628	0.0756909
O95786	DDX58	Probable ATP-dependent RNA helicase DDX58 OS=Homo sapiens GN=DDX58 PE=1 SV=2	24.973	20	40	20	0	0	925	106.5	8.70771e-08	-0.0192841	-0.233276	0.258086	6.37616e-05	5.23307e-05	6.74429e-08	-0.213992	0.277371	0.491363	0	0	1	-0.0180027	-0.0544091	-0.10461	0.0133028	0.0392941	0.00872082	-0.266594	-0.107688	-0.242616	-0.266329	-0.217436	-0.343077	-0.189194	0.262924	0.273487	0.237848
Q9H4A4	RNPEP	Aminopeptidase B OS=Homo sapiens GN=RNPEP PE=1 SV=2	61.6923	35	278	35	0	0	650	72.5	8.71357e-08	0.156556	-0.0689103	-0.00128725	6.25283e-08	4.91536e-05	0.0317821	-0.225466	-0.157843	0.0676231	0	0	0	0.123951	0.174773	0.16671	0.184245	0.12537	0.164286	-0.0612128	-0.0560558	-0.0575677	0.00104372	-0.0716978	-0.104955	-0.131927	0.0200574	-0.0270677	0.00314856
O75955	FLOT1	Flotillin-1 OS=Homo sapiens GN=FLOT1 PE=1 SV=3	83.1382	37	274	37	0	0	427	47.3	8.72352e-08	-0.112874	0.0503012	-0.0029367	6.04607e-08	7.02747e-05	0.0195391	0.163175	0.109937	-0.0532379	0	0	0	-0.117951	-0.11806	-0.139444	-0.0861887	-0.108271	-0.107327	0.0229762	0.0361148	0.104263	0.0434728	0.0338739	0.0262992	0.0851084	-0.00157752	0.00869928	-0.0159319
Q9BS40	LXN	Latexin OS=Homo sapiens GN=LXN PE=1 SV=2	39.6396	7	23	7	6	0	222	25.7	8.88891e-08	0.062581	-0.135322	0.221413	7.75821e-06	0.000717851	1.09193e-07	-0.197903	0.158832	0.356734	0	0	0	0.0775655	0.0810074	0.0570031	0.0813589	0.0261026	0.0524483	-0.0679611	-0.143576	-0.112085	-0.0817846	-0.129727	-0.236887	-0.175231	0.269987	0.176389	0.217862
Q92896-2	GLG1	Isoform 2 of Golgi apparatus protein 1 OS=Homo sapiens GN=GLG1	58.4372	67	377	26	0	55	1203	137.1	8.89457e-08	0.133152	-0.121092	0.0497689	6.91496e-08	0.0232873	6.31727e-05	-0.254245	-0.0833835	0.170861	0	0	0	0.11249	0.109212	0.146626	0.180445	0.125138	0.125002	-0.148156	-0.165799	-0.142862	-0.139348	-0.0854284	-0.146172	-0.0198822	0.0411639	0.0524895	0.0556532
Q9H0F7	ARL6	ADP-ribosylation factor-like protein 6 OS=Homo sapiens GN=ARL6 PE=1 SV=1	68.8172	10	29	10	1	0	186	21.1	8.906e-08	0.208388	-0.169669	0.107129	7.84467e-08	0.0678386	2.93739e-05	-0.378057	-0.101259	0.276798	0	0	0	0.214749	0.210731	0.14346	0.236984	0.223559	0.220843	-0.142869	-0.10372	-0.151867	-0.0481327	-0.244148	-0.25115	-0.245795	0.103427	0.103058	0.114902
Q15004	KIAA0101	PCNA-associated factor OS=Homo sapiens GN=KIAA0101 PE=1 SV=1	70.2703	8	69	8	0	0	111	12	8.917e-08	-0.0973633	-0.22986	0.421604	0.025293	1.19298e-06	6.28613e-08	-0.132496	0.518967	0.651463	0	1	1	-0.122945	-0.0162696	-0.163215	-0.170423	-0.0291319	-0.0821951	-0.128317	-0.12263	-0.239289	-0.186443	-0.398788	-0.244991	-0.288559	0.396249	0.469743	0.398819
Q9C0B0	UNK	RING finger protein unkempt homolog OS=Homo sapiens GN=UNK PE=1 SV=2	40.1235	30	89	29	19	1	810	88	8.92044e-08	0.142134	-0.145549	0.0881069	9.67555e-08	0.241549	1.18595e-05	-0.287683	-0.0540274	0.233656	0	0	0	0.116219	0.155107	0.1586	0.140093	0.126044	0.156742	-0.0941868	-0.0755062	-0.086271	-0.212328	-0.142871	-0.203935	-0.203745	0.101118	0.0496246	0.113578
Q8IU85	CAMK1D	Calcium/calmodulin-dependent protein kinase type 1D OS=Homo sapiens GN=CAMK1D PE=1 SV=1	41.2987	12	35	12	0	0	385	42.9	8.95524e-08	0.305367	-0.214304	0.008719	5.74467e-08	0.000330271	0.0029758	-0.519671	-0.296648	0.223023	1	1	0	0.297415	0.291101	0.256566	0.377388	0.331553	0.278175	-0.149097	-0.108987	-0.147497	-0.11845	-0.299159	-0.310398	-0.366543	0.02698	0.000285444	-0.00110844
Q9BZE1	MRPL37	39S ribosomal protein L37, mitochondrial OS=Homo sapiens GN=MRPL37 PE=1 SV=2	66.4303	23	98	23	0	0	423	48.1	8.98105e-08	0.22552	-0.0952325	-0.103257	1.52487e-07	1.83044e-06	0.972881	-0.320752	-0.328777	-0.00802495	0	1	0	0.214939	0.207458	0.195381	0.242994	0.259892	0.232456	-0.147169	-0.138609	-0.0657505	0.0457221	-0.124441	-0.160619	-0.0757609	-0.082741	-0.0930217	-0.13401
O94923	GLCE	D-glucuronyl C5-epimerase OS=Homo sapiens GN=GLCE PE=1 SV=3	24.9595	12	28	12	1	0	617	70.1	8.99179e-08	0.144472	-0.160062	0.038442	6.74713e-08	0.0161963	8.38877e-05	-0.304533	-0.10603	0.198504	0	0	0	0.188297	0.0854358	0.214881	0.133625	0.111863	0.132728	-0.196256	-0.159208	-0.122363	-0.115526	-0.150186	-0.242549	-0.134343	0.0855744	0.00161992	0.0281317
Q15397	KIAA0020	Pumilio domain-containing protein KIAA0020 OS=Homo sapiens GN=KIAA0020 PE=1 SV=3	59.4136	32	295	31	30	1	648	73.5	9.00574e-08	-0.153769	0.0889049	-0.0217921	5.75068e-08	0.000512116	0.00184662	0.242673	0.131976	-0.110697	0	0	0	-0.185823	-0.136245	-0.204114	-0.15227	-0.11831	-0.125851	0.0806611	0.0635182	0.0478261	0.150914	0.0408556	0.101989	0.136571	-0.0231368	-0.0115148	-0.0307248
Q9NRR4	DROSHA	Ribonuclease 3 OS=Homo sapiens GN=DROSHA PE=1 SV=2	23.5808	27	64	26	0	0	1374	159.2	9.05747e-08	-0.100804	0.0687457	-0.0248599	6.00102e-08	0.00265696	0.000370732	0.16955	0.075944	-0.0936056	0	0	0	-0.114342	-0.15454	-0.0833762	-0.0825033	-0.0920837	-0.0779781	0.0742294	0.0913507	0.0293705	0.0825648	0.0668563	0.0410535	0.0957948	-0.0165078	-0.0392177	-0.018854
Q8IXM3	MRPL41	39S ribosomal protein L41, mitochondrial OS=Homo sapiens GN=MRPL41 PE=1 SV=1	55.4745	5	31	5	5	0	137	15.4	9.08313e-08	0.181197	-0.126604	-0.0601134	7.56846e-08	1.79748e-05	0.140111	-0.307801	-0.24131	0.0664904	0	0	0	0.183418	0.198262	0.162289	0.182238	0.209234	0.151739	-0.17468	-0.181891	-0.186492	-0.0164182	-0.147978	-0.063271	-0.115497	-0.0467329	-0.0506022	-0.083005
Q9Y2G5	POFUT2	GDP-fucose protein O-fucosyltransferase 2 OS=Homo sapiens GN=POFUT2 PE=1 SV=3	50.1166	20	51	20	5	0	429	49.9	9.4262e-08	-0.14069	0.107386	-0.066772	7.77247e-08	0.0409727	4.48586e-05	0.248076	0.073918	-0.174158	0	0	0	-0.17794	-0.166169	-0.154677	-0.0993001	-0.111463	-0.134591	0.0823839	0.135389	0.0235604	0.171278	0.137441	0.0863695	0.115279	-0.0649232	-0.0648302	-0.0705626
O60566-3	BUB1B	Isoform 3 of Mitotic checkpoint serine/threonine-protein kinase BUB1 beta OS=Homo sapiens GN=BUB1B	73.4962	68	465	68	0	0	1064	121.3	9.45195e-08	0.0673041	-0.0340058	0.00373282	6.25613e-08	0.000145084	0.00864868	-0.10131	-0.0635713	0.0377386	0	0	0	0.0468739	0.0822954	0.050865	0.0762492	0.0799341	0.0676072	-0.014429	-0.0168005	-0.0327477	-0.0221034	-0.0492061	-0.0492044	-0.0535492	0.0117748	-0.00755287	0.00697652
Q495W5	FUT11	Alpha-(1,3)-fucosyltransferase 11 OS=Homo sapiens GN=FUT11 PE=1 SV=1	18.0894	8	16	8	0	0	492	55.8	9.46795e-08	-0.385381	0.213592	-0.0185497	6.19797e-08	0.000181668	0.00656264	0.598973	0.366831	-0.232141	1	1	0	-0.381722	-0.364596	-0.422724	-0.431087	-0.380989	-0.331167	0.142874	0.264478	0.216957	-0.00119938	0.271767	0.206313	0.393954	0.0128038	0.0264814	-0.0949343
Q9UBS8	RNF14	E3 ubiquitin-protein ligase RNF14 OS=Homo sapiens GN=RNF14 PE=1 SV=1	39.8734	16	69	16	0	0	474	53.8	9.6064e-08	0.0828119	-0.0655233	-0.00155868	6.16129e-08	0.000360059	0.00300009	-0.148335	-0.0843706	0.0639646	0	0	0	0.0628027	0.0550608	0.11792	0.0937287	0.0789105	0.0884488	-0.05375	-0.0206646	-0.0936747	-0.0821445	-0.0582274	-0.06836	-0.0818417	-0.00560567	-0.0121656	0.0130952
Q14527	HLTF	Helicase-like transcription factor OS=Homo sapiens GN=HLTF PE=1 SV=2	65.3122	59	366	59	0	0	1009	113.9	9.82199e-08	0.156091	-0.0872759	-0.0244022	7.53774e-08	3.19636e-05	0.0703488	-0.243367	-0.180493	0.0628737	0	0	0	0.158076	0.158486	0.143592	0.166921	0.155539	0.153931	-0.0342187	-0.0232126	-0.0639781	-0.167145	-0.0830696	-0.0949555	-0.144352	-0.0228143	-0.0412853	-0.00910705
Q6YHK3	CD109	CD109 antigen OS=Homo sapiens GN=CD109 PE=1 SV=2	25.8131	32	75	32	0	0	1445	161.6	9.8353e-08	0.264266	-0.154522	-0.0430366	7.44524e-08	3.52934e-05	0.0613342	-0.418788	-0.307303	0.111486	0	1	0	0.244259	0.253813	0.286397	0.259201	0.259387	0.282538	-0.276955	-0.256195	-0.180504	-0.120341	-0.0888728	-0.144584	-0.0142056	-0.0278215	-0.0419973	-0.0592912
O43615	TIMM44	Mitochondrial import inner membrane translocase subunit TIM44 OS=Homo sapiens GN=TIMM44 PE=1 SV=2	62.1681	30	233	30	3	0	452	51.3	9.87043e-08	-0.0387547	0.102046	-0.175734	1.84539e-05	0.000263509	9.78594e-08	0.1408	-0.136979	-0.277779	0	0	0	-0.0467392	-0.01289	-0.0404007	-0.0177643	-0.025797	-0.0889371	0.116601	0.100687	0.155682	0.13987	0.0589263	0.0435615	0.0989916	-0.188639	-0.13774	-0.200821
Q9P2K3-3	RCOR3	Isoform 3 of REST corepressor 3 OS=Homo sapiens GN=RCOR3	45.3888	23	95	17	0	0	553	61.2	1.00762e-07	0.0862906	-0.112644	0.0792272	1.8161e-07	0.950185	3.24967e-06	-0.198935	-0.00706348	0.191871	0	0	0	0.0490823	0.0941084	0.0963732	0.0837548	0.0804797	0.113945	-0.0607424	-0.0639329	-0.0866511	-0.163264	-0.149747	-0.154275	-0.109897	0.0856906	0.0688673	0.0831235
Q8NBJ5	COLGALT1	Procollagen galactosyltransferase 1 OS=Homo sapiens GN=COLGALT1 PE=1 SV=1	55.627	34	208	33	14	1	622	71.6	1.01318e-07	-0.0599681	0.07165	-0.106279	1.00618e-06	0.0529658	3.72837e-07	0.131618	-0.0463106	-0.177929	0	0	0	-0.0825495	-0.0428525	-0.0715331	-0.0551854	-0.0606372	-0.047051	0.0914521	0.0685936	0.083504	0.124067	0.0424368	0.0457368	0.0457602	-0.0745799	-0.128306	-0.11595
Q96JG8-4	MAGED4	Isoform 4 of Melanoma-associated antigen D4 OS=Homo sapiens GN=MAGED4	54.4254	29	122	1	0	40	757	83.2	1.014e-07	0.0185241	-0.105578	0.132146	1.46457e-05	0.000376711	1.07146e-07	-0.124102	0.113622	0.237725	0	0	0	-0.0139358	0.0167819	-0.0323777	0.0376242	0.0614279	0.0416239	-0.109113	-0.121975	-0.137907	-0.0863234	-0.133603	-0.0941324	-0.0559927	0.147445	0.127878	0.121117
Q8IVL0	NAV3	Neuron navigator 3 OS=Homo sapiens GN=NAV3 PE=1 SV=3	21.8868	44	87	39	0	5	2385	255.5	1.01812e-07	-0.331222	0.0212306	0.172382	1.01125e-06	2.60961e-07	0.0160538	0.352452	0.503604	0.151151	0	1	0	-0.37472	-0.320623	-0.424087	-0.372549	-0.294179	-0.201172	0.0424987	0.0802372	0.0528346	-0.111834	0.00258427	0.0116439	0.0706496	0.165936	0.211747	0.139463
Q13277	STX3	Syntaxin-3 OS=Homo sapiens GN=STX3 PE=1 SV=3	35.2941	13	53	13	0	0	289	33.1	1.01948e-07	-0.169743	0.0773298	0.0203046	8.2418e-08	2.36578e-05	0.113785	0.247072	0.190047	-0.0570251	0	0	0	-0.231996	-0.162109	-0.120792	-0.198072	-0.164297	-0.14119	0.0816469	0.0603354	0.0243044	0.153827	0.077627	0.0447063	0.0988614	0.0328056	0.00678598	0.0213223
O94885	SASH1	SAM and SH3 domain-containing protein 1 OS=Homo sapiens GN=SASH1 PE=1 SV=3	22.8549	21	41	21	5	0	1247	136.6	1.03632e-07	0.217384	-0.176925	0.0729367	7.55764e-08	0.0125326	0.000121451	-0.394309	-0.144447	0.249862	0	0	0	0.187191	0.236122	0.221778	0.201855	0.197421	0.259939	-0.0880893	-0.0811639	-0.0997804	-0.267234	-0.198777	-0.258304	-0.245126	0.0607726	0.0656229	0.0924148
O00161	SNAP23	Synaptosomal-associated protein 23 OS=Homo sapiens GN=SNAP23 PE=1 SV=1	80.0948	17	176	17	0	0	211	23.3	1.04067e-07	-0.133999	0.0685628	-0.0448494	6.94557e-08	0.00333638	0.000364587	0.202561	0.0891492	-0.113412	0	0	0	-0.170664	-0.11612	-0.161666	-0.109982	-0.120543	-0.125017	0.0320676	0.0444825	0.0155462	0.106041	0.0957198	0.0730206	0.113062	-0.0378242	-0.0419016	-0.0548224
Q9HCE1	MOV10	Putative helicase MOV-10 OS=Homo sapiens GN=MOV10 PE=1 SV=2	72.2832	68	417	68	0	0	1003	113.6	1.05066e-07	0.0733299	-0.0878817	0.0771419	2.38206e-07	0.978542	2.16313e-06	-0.161212	0.003812	0.165024	0	0	0	0.052749	0.097787	0.0516899	0.0757175	0.0827277	0.0793081	-0.129811	-0.110453	-0.113707	-0.0435522	-0.0413864	-0.0775251	-0.0987384	0.0939106	0.0801115	0.0574034
A2RU54	HMX2	Homeobox protein HMX2 OS=Homo sapiens GN=HMX2 PE=2 SV=1	11.3553	3	7	2	2	0	273	29.6	1.05558e-07	0.137065	-0.165572	0.147873	2.5126e-07	0.952255	1.99576e-06	-0.302637	0.0108079	0.313445	0	0	0	0.132168	0.130146	0.144713	0.162452	0.13862	0.114292	-0.177494	-0.0534125	-0.204708	-0.145785	-0.135615	-0.269582	-0.172407	0.181043	0.0826196	0.179956
P10606	COX5B	Cytochrome c oxidase subunit 5B, mitochondrial OS=Homo sapiens GN=COX5B PE=1 SV=2	49.6124	7	63	7	7	0	129	13.7	1.06801e-07	0.229805	-0.131092	-0.0503072	8.75716e-08	2.27088e-05	0.129312	-0.360897	-0.280112	0.080785	0	1	0	0.198767	0.268763	0.25889	0.246564	0.196538	0.209309	-0.192562	-0.235528	-0.0243451	-0.0572195	-0.142332	-0.168095	-0.0975645	-0.0411252	-0.0787692	-0.0310273
Q6WKZ4	RAB11FIP1	Rab11 family-interacting protein 1 OS=Homo sapiens GN=RAB11FIP1 PE=1 SV=3	36.5549	36	136	34	1	2	1283	137.1	1.07018e-07	-0.13612	0.0673212	-0.0703331	8.39475e-08	0.0275846	6.94168e-05	0.203441	0.0657865	-0.137654	0	0	0	-0.154333	-0.11693	-0.184494	-0.108619	-0.125019	-0.127324	0.0450859	0.0692089	0.0461858	0.00525769	0.105498	0.105273	0.0947391	-0.0834146	-0.0707598	-0.056825
P17568	NDUFB7	NADH dehydrogenase [ubiquinone] 1 beta subcomplex subunit 7 OS=Homo sapiens GN=NDUFB7 PE=1 SV=4	57.6642	7	50	7	5	0	137	16.4	1.0722e-07	0.135965	-0.131195	0.0634133	9.3646e-08	0.0681479	3.60878e-05	-0.26716	-0.0725519	0.194608	0	0	0	0.111791	0.121172	0.117401	0.133647	0.137996	0.193783	-0.168059	-0.17051	-0.187715	-0.0661795	-0.11688	-0.156789	-0.0522312	0.0822882	0.0507291	0.0572227
Q8WVX9	FAR1	Fatty acyl-CoA reductase 1 OS=Homo sapiens GN=FAR1 PE=1 SV=1	52.6214	24	91	24	3	0	515	59.3	1.07934e-07	-0.236089	0.199703	-0.156185	1.18514e-07	0.267207	1.34256e-05	0.435792	0.0799044	-0.355887	1	0	1	-0.097445	-0.285485	-0.296343	-0.239005	-0.234045	-0.264211	0.161327	0.103688	0.107116	0.30318	0.221682	0.247789	0.253137	-0.173119	-0.153962	-0.141473
P98170	XIAP	E3 ubiquitin-protein ligase XIAP OS=Homo sapiens GN=XIAP PE=1 SV=2	62.3742	27	117	27	19	0	497	56.6	1.08601e-07	0.0615754	-0.050159	0.0423936	1.23409e-07	0.312241	1.19653e-05	-0.111734	-0.0191818	0.0925526	0	0	0	0.0420325	0.0667343	0.0560694	0.067975	0.0883657	0.0482754	-0.0614486	-0.0319043	-0.0427338	-0.0152874	-0.0672916	-0.0676398	-0.0648079	0.0504238	0.0312381	0.0455187
Q96JQ0	DCHS1	Protocadherin-16 OS=Homo sapiens GN=DCHS1 PE=1 SV=1	2.94118	5	9	5	5	0	3298	346	1.08803e-07	-0.390928	-0.00457867	0.326899	8.43429e-06	1.11606e-07	0.000340999	0.38635	0.717827	0.331478	0	1	0	-0.564024	-0.403309	-0.425715	-0.367039	-0.342146	-0.243338	0.0155446	0.0149294	0.0411827	-0.0789513	0.0308974	-0.132652	0.0769989	0.417531	0.247266	0.3159
Q9BZK7	TBL1XR1	F-box-like/WD repeat-containing protein TBL1XR1 OS=Homo sapiens GN=TBL1XR1 PE=1 SV=1	69.6498	26	194	19	18	9	514	55.6	1.09001e-07	0.148247	-0.134301	0.0632441	8.93638e-08	0.0414036	5.26608e-05	-0.282548	-0.085003	0.197545	0	0	0	0.103167	0.193277	0.17078	0.155503	0.143464	0.123292	-0.112121	-0.0792992	-0.0710783	-0.229424	-0.110486	-0.161595	-0.176106	0.0588711	0.0617504	0.0691108
P27797	CALR	Calreticulin OS=Homo sapiens GN=CALR PE=1 SV=1	83.693	34	1605	34	17	0	417	48.1	1.09043e-07	-0.119535	0.124909	-0.0354288	8.24355e-08	0.0192178	9.30434e-05	0.244444	0.0841061	-0.160338	0	0	0	-0.0647868	-0.114333	-0.0760087	-0.159012	-0.161612	-0.141456	0.128493	0.132028	0.154786	0.189824	0.0707221	0.0888334	0.10968	-0.0303986	-0.0354159	-0.0404718
Q96TC7	RMDN3	Regulator of microtubule dynamics protein 3 OS=Homo sapiens GN=RMDN3 PE=1 SV=2	48.7234	22	126	22	0	0	470	52.1	1.09367e-07	-0.127607	0.0880624	-0.0890402	1.2168e-07	0.284704	1.29599e-05	0.215669	0.0385663	-0.177103	0	0	0	-0.0732906	-0.16023	-0.142668	-0.0994329	-0.124781	-0.165236	0.0608192	0.0753669	0.0747558	0.136717	0.0873795	0.0435258	0.137873	-0.0816427	-0.0720721	-0.113406
Q9UDY2-6	TJP2	Isoform 6 of Tight junction protein ZO-2 OS=Homo sapiens GN=TJP2	52.1175	54	240	5	1	57	1157	130.4	1.09885e-07	0.0983937	-0.190242	0.21192	1.32756e-06	0.0343865	3.48213e-07	-0.288636	0.113526	0.402162	0	0	1	0.0657093	0.1144	0.0803464	0.096393	0.114931	0.118582	-0.231298	-0.259172	-0.266618	-0.248208	-0.132391	-0.128824	-0.0651839	0.23059	0.194503	0.210665
P31949	S100A11	Protein S100-A11 OS=Homo sapiens GN=S100A11 PE=1 SV=2	80	7	66	7	7	0	105	11.7	1.10095e-07	-0.0399918	0.230407	-0.710024	0.00268911	4.63511e-06	7.04891e-08	0.270398	-0.670032	-0.940431	0	1	1	-0.0491272	-0.0663055	-0.0238339	0.0257303	-0.0185906	-0.107824	0.143401	0.114992	0.0555872	0.112656	0.454265	0.42881	0.303135	-0.747042	-0.685949	-0.697082
Q92963-3	RIT1	Isoform 3 of GTP-binding protein Rit1 OS=Homo sapiens GN=RIT1	32.6271	5	9	5	0	0	236	27.1	1.1055e-07	-0.260169	0.207317	-0.255429	2.19231e-07	0.995957	2.909e-06	0.467486	0.00473996	-0.462746	1	0	1	-0.287906	-0.225444	-0.309636	-0.267301	-0.26756	-0.203166	0.105968	0.177341	0.13584	0.167103	0.355068	0.174819	0.335079	-0.157831	-0.316559	-0.291896
Q99674-5	CGREF1	Isoform 5 of Cell growth regulator with EF hand domain protein 1 OS=Homo sapiens GN=CGREF1	6.81818	2	4	2	0	0	440	47	1.11357e-07	-0.108486	-0.459421	0.504103	0.000381289	1.66375e-05	7.43737e-08	-0.350934	0.612589	0.963523	0	1	1	-0.102107	-0.126878	-0.176234	-0.0794958	-0.118007	-0.0481947	-0.477942	-0.626279	-0.741812	-0.317984	-0.327137	-0.362993	-0.361797	0.457365	0.58113	0.473813
Q9HC62	SENP2	Sentrin-specific protease 2 OS=Homo sapiens GN=SENP2 PE=1 SV=3	31.2394	20	36	20	0	0	589	67.8	1.14015e-07	-0.0915623	0.0450872	0.00444537	8.21934e-08	5.97242e-05	0.0374227	0.136649	0.0960076	-0.0406418	0	0	0	-0.106107	-0.0920224	-0.117714	-0.101262	-0.0591884	-0.0730795	0.0317719	0.0283645	0.0340145	0.0826944	0.0352152	0.0449546	0.0585951	0.0305194	-0.0149204	-0.00226285
Q15649	ZNHIT3	Zinc finger HIT domain-containing protein 3 OS=Homo sapiens GN=ZNHIT3 PE=1 SV=2	39.3548	7	22	7	1	0	155	17.6	1.14243e-07	-0.189938	0.0760368	0.0349958	1.10022e-07	1.12163e-05	0.361018	0.265975	0.224934	-0.041041	0	0	0	-0.22063	-0.184807	-0.253953	-0.222578	-0.124075	-0.133586	0.114783	0.0859152	0.0519457	0.109396	0.00423373	0.0780938	0.0878911	0.0402188	0.0498786	0.01489
Q9NR34	MAN1C1	Mannosyl-oligosaccharide 1,2-alpha-mannosidase IC OS=Homo sapiens GN=MAN1C1 PE=1 SV=1	3.01587	2	3	2	1	0	630	70.9	1.14847e-07	0.582108	-0.381264	0.146523	7.59258e-08	0.00287547	0.00047456	-0.963372	-0.435585	0.527786	1	1	1	0.614287	0.430877	0.590391	0.756555	0.642638	0.457901	-0.343715	-0.633243	-0.328028	-0.109447	-0.486157	-0.230009	-0.538246	0.177873	0.190208	0.0714864
Q9BZE4	GTPBP4	Nucleolar GTP-binding protein 1 OS=Homo sapiens GN=GTPBP4 PE=1 SV=3	61.8297	44	384	44	3	0	634	73.9	1.14926e-07	-0.118125	0.0559583	-0.00167254	7.92956e-08	9.44154e-05	0.0204859	0.174084	0.116453	-0.0576308	0	0	0	-0.146888	-0.0824185	-0.152437	-0.143497	-0.0893722	-0.09414	0.0805428	0.0724869	0.0270392	0.0513132	0.0152653	0.0729584	0.0721021	-0.00204159	-0.00417087	0.00119483
Q02818	NUCB1	Nucleobindin-1 OS=Homo sapiens GN=NUCB1 PE=1 SV=4	54.8807	24	110	23	7	0	461	53.8	1.1541e-07	-0.0529752	-0.132611	0.224648	0.0165451	1.95153e-06	7.8589e-08	-0.0796362	0.277623	0.357259	0	0	0	-0.0926692	-0.0589006	-0.0504495	-0.0261613	-0.0446146	-0.0450558	-0.16662	-0.157562	-0.124566	-0.187157	-0.113245	-0.168413	-0.0107157	0.22022	0.199145	0.254579
Q13643	FHL3	Four and a half LIM domains protein 3 OS=Homo sapiens GN=FHL3 PE=1 SV=4	80.3571	12	53	12	12	0	280	31.2	1.1564e-07	-0.108348	0.140473	-0.119142	2.83591e-07	0.931839	2.06333e-06	0.248821	-0.0107948	-0.259615	0	0	0	-0.133814	-0.181882	-0.0909555	-0.0543837	-0.0841159	-0.104934	0.158922	0.106154	0.116459	0.181803	0.142513	0.169958	0.107503	-0.0713866	-0.190308	-0.0957329
Q99986	VRK1	Serine/threonine-protein kinase VRK1 OS=Homo sapiens GN=VRK1 PE=1 SV=1	63.1313	22	284	20	6	4	396	45.4	1.17263e-07	0.0295874	-0.103789	0.113013	4.33083e-06	0.00351605	1.97375e-07	-0.133377	0.0834258	0.216802	0	0	0	0.0151188	0.0350818	0.00915619	0.0426503	0.0517756	0.0237416	-0.0795253	-0.0998996	-0.0608538	-0.182465	-0.108032	-0.0929768	-0.102772	0.0907366	0.119565	0.128738
Q7KZN9	COX15	Cytochrome c oxidase assembly protein COX15 homolog OS=Homo sapiens GN=COX15 PE=1 SV=1	23.6585	9	51	9	0	0	410	46	1.19782e-07	-0.201921	0.055111	0.0595308	1.97084e-07	2.54698e-06	0.987628	0.257032	0.261451	0.00441979	0	0	0	-0.221797	-0.197605	-0.229501	-0.152318	-0.210176	-0.200126	0.0623162	0.0253516	-0.00300214	0.16609	0.0734799	0.0339528	0.0275894	0.0530374	0.0340478	0.0915073
D3DSM6	SLC19A1	Folate transporter 1 OS=Homo sapiens GN=SLC19A1 PE=1 SV=1	12.5612	5	20	3	0	2	613	67.2	1.19782e-07	-0.246111	0.138022	-0.0899498	8.27995e-08	0.00660159	0.000243964	0.384133	0.156161	-0.227972	0	0	0	-0.286558	-0.184617	-0.322666	-0.286228	-0.245035	-0.151563	0.174805	0.101144	0.06925	0.224196	0.0595843	0.154482	0.182693	-0.0735978	-0.0990725	-0.0971792
Q71RC2-4	LARP4	Isoform 4 of La-related protein 4 OS=Homo sapiens GN=LARP4	56.0274	36	259	28	0	14	730	81.2	1.20369e-07	-0.0902078	0.0127543	0.0488663	8.197e-07	4.05955e-07	0.043873	0.102962	0.139074	0.036112	0	0	0	-0.0784162	-0.0930626	-0.107479	-0.124596	-0.0731318	-0.0645614	0.01649	0.00539918	-0.0107598	0.00424482	-0.00179983	0.0393955	0.0363106	0.0548363	0.0502366	0.0415261
P06756	ITGAV	Integrin alpha-V OS=Homo sapiens GN=ITGAV PE=1 SV=2	46.9466	42	179	42	0	0	1048	116	1.20868e-07	-0.177822	0.162127	-0.145148	1.74911e-07	0.692652	6.41046e-06	0.339949	0.032674	-0.307275	0	0	0	-0.219623	-0.175393	-0.213013	-0.134028	-0.147031	-0.177846	0.0732301	0.0812592	0.108528	0.174968	0.217427	0.212986	0.266491	-0.141288	-0.130547	-0.163609
H7BY36	EWSR1	RNA-binding protein EWS (Fragment) OS=Homo sapiens GN=EWSR1 PE=1 SV=1	36.6883	11	134	4	4	0	308	32.2	1.22187e-07	0.116929	-0.204624	0.217153	9.94358e-07	0.0893585	5.2278e-07	-0.321553	0.100224	0.421777	0	0	1	0.110776	0.0935069	0.0935069	0.142447	0.153894	0.107443	-0.134895	-0.153396	-0.131603	-0.381021	-0.184448	-0.21445	-0.232556	0.208141	0.232361	0.210956
O75380	NDUFS6	NADH dehydrogenase [ubiquinone] iron-sulfur protein 6, mitochondrial OS=Homo sapiens GN=NDUFS6 PE=1 SV=1	59.6774	6	46	6	2	0	124	13.7	1.22439e-07	0.124541	-0.139448	-0.0160983	7.83175e-08	0.000769617	0.00187305	-0.263989	-0.140639	0.123349	0	0	0	0.0946189	0.111674	0.141475	0.127399	0.143812	0.128266	-0.163648	-0.0824852	-0.137483	-0.219674	-0.0731439	-0.181558	-0.118142	-0.0392455	0.0259673	-0.0350167
Q8N2W9	PIAS4	E3 SUMO-protein ligase PIAS4 OS=Homo sapiens GN=PIAS4 PE=1 SV=1	31.3725	14	43	14	14	0	510	56.5	1.22484e-07	-0.0908867	0.0537662	0.0298762	1.14757e-07	1.33737e-05	0.317681	0.144653	0.120763	-0.02389	0	0	0	-0.106553	-0.0959223	-0.135055	-0.0692867	-0.0821913	-0.0563114	0.0614066	0.0477741	0.0330139	0.074112	0.0397731	0.053496	0.0667876	0.0313499	0.056996	0.00128264
Q04726-3	TLE3	Isoform 3 of Transducin-like enhancer protein 3 OS=Homo sapiens GN=TLE3	48.5602	30	160	1	0	37	764	82.6	1.22859e-07	0.0573345	-0.0880106	0.09274	7.26123e-07	0.190093	7.04605e-07	-0.145345	0.0354055	0.180751	0	0	0	0.0256516	0.0691076	0.0549756	0.0701935	0.0572438	0.0668347	-0.064653	-0.0807868	-0.0602912	-0.0606218	-0.100103	-0.0946014	-0.155018	0.085036	0.0725921	0.120592
Q86U44	METTL3	N6-adenosine-methyltransferase 70 kDa subunit OS=Homo sapiens GN=METTL3 PE=1 SV=2	60.8621	25	142	25	4	0	580	64.4	1.23132e-07	-0.0945316	0.120504	-0.114703	3.72376e-07	0.734247	1.57698e-06	0.215035	-0.020171	-0.235206	0	0	0	-0.128762	-0.0627576	-0.13037	-0.0749165	-0.0945003	-0.0758831	0.162918	0.170444	0.171421	0.0782519	0.107775	0.0950178	0.0576978	-0.131645	-0.0929078	-0.119555
Q9NXR7	BRE	BRCA1-A complex subunit BRE OS=Homo sapiens GN=BRE PE=1 SV=2	57.7023	18	121	18	2	0	383	43.5	1.24561e-07	0.0703505	-0.0823222	0.0871071	4.03289e-07	0.661271	1.44662e-06	-0.152673	0.0167566	0.169429	0	0	0	0.060394	0.0392068	0.0676776	0.063899	0.0876905	0.103235	-0.0959585	-0.0650957	-0.101631	-0.0146891	-0.0850977	-0.108947	-0.104837	0.0993824	0.0848154	0.0771234
Q86UU0	BCL9L	B-cell CLL/lymphoma 9-like protein OS=Homo sapiens GN=BCL9L PE=1 SV=1	9.87325	12	40	12	0	0	1499	157	1.25854e-07	-0.569901	0.208111	-0.0148311	9.22381e-08	5.64131e-05	0.0472737	0.778013	0.55507	-0.222943	1	1	0	-0.696887	-0.543389	-0.600762	-0.542566	-0.514301	-0.521504	0.0901198	0.162563	0.0417902	0.0238769	0.378758	0.375115	0.384557	-0.0240918	0.00207172	-0.0224731
Q8N4Q0	ZADH2	Zinc-binding alcohol dehydrogenase domain-containing protein 2 OS=Homo sapiens GN=ZADH2 PE=1 SV=1	33.9523	12	22	12	4	0	377	40.1	1.26076e-07	0.227498	-0.136102	-0.0275912	9.07836e-08	6.5885e-05	0.0383773	-0.3636	-0.25509	0.10851	0	0	0	0.237995	0.230432	0.25613	0.234169	0.21417	0.192095	-0.108551	-0.100925	-0.0390031	-0.0721373	-0.177445	-0.262106	-0.192543	0.0149075	-0.0471278	-0.0505534
Q9P2B2	PTGFRN	Prostaglandin F2 receptor negative regulator OS=Homo sapiens GN=PTGFRN PE=1 SV=2	37.7702	32	122	32	32	0	879	98.5	1.26731e-07	0.113153	-0.138347	0.125628	3.18328e-07	0.913628	2.15691e-06	-0.2515	0.0124751	0.263975	0	0	0	0.0872085	0.107896	0.112064	0.134857	0.126476	0.110416	-0.217309	-0.220099	-0.161301	-0.0760162	-0.108635	-0.111255	-0.0738152	0.125822	0.120735	0.130328
Q7Z7F0	KIAA0907	UPF0469 protein KIAA0907 OS=Homo sapiens GN=KIAA0907 PE=1 SV=1	43.9739	18	83	18	3	0	614	64.8	1.2812e-07	0.0872756	-0.0687994	0.0446326	1.11485e-07	0.0707452	4.29202e-05	-0.156075	-0.042643	0.113432	0	0	0	0.0566986	0.111522	0.0575779	0.109179	0.0667216	0.121954	-0.0876164	-0.061225	-0.0294433	-0.0743956	-0.0838395	-0.0762159	-0.0688599	0.0704896	0.0392614	0.0241468
E9PLM6	MDK	Midkine OS=Homo sapiens GN=MDK PE=1 SV=1	61.5385	13	71	13	0	0	156	16.9	1.28199e-07	-0.604678	0.329207	-0.475347	1.61218e-07	0.472752	1.00052e-05	0.933885	0.129332	-0.804553	1	0	1	-0.66502	-0.597287	-0.619092	-0.509504	-0.559712	-0.677454	0.235393	0.163176	0.257011	0.0384749	0.66262	0.494924	0.452849	-0.496713	-0.46913	-0.460197
O95749	GGPS1	Geranylgeranyl pyrophosphate synthase OS=Homo sapiens GN=GGPS1 PE=1 SV=1	39	11	37	11	0	0	300	34.8	1.29501e-07	0.115771	-0.00968412	-0.141404	2.34654e-05	1.08872e-07	0.000125915	-0.125455	-0.257175	-0.13172	0	0	0	0.0587924	0.123074	0.174968	0.147543	0.0920064	0.0982441	0.011572	0.0271989	-0.0033043	-0.0336897	-0.00930553	-0.0076421	-0.0526181	-0.145082	-0.128563	-0.150567
O75528	TADA3	Transcriptional adapter 3 OS=Homo sapiens GN=TADA3 PE=1 SV=1	51.1574	17	42	17	3	0	432	48.9	1.30342e-07	-0.110628	0.0492896	-0.0261786	8.34267e-08	0.00086881	0.00180462	0.159918	0.0844498	-0.0754682	0	0	0	-0.141885	-0.0850564	-0.126817	-0.110815	-0.103234	-0.0959621	0.0509219	0.0287023	0.0281272	0.0897937	0.0143156	0.0672091	0.0659574	-0.00957858	-0.0122778	-0.0566794
Q6P0N0	MIS18BP1	Mis18-binding protein 1 OS=Homo sapiens GN=MIS18BP1 PE=1 SV=1	41.9611	40	122	40	16	0	1132	129	1.30564e-07	0.0760502	-0.0833238	0.00839641	8.85271e-08	0.00505839	0.000341456	-0.159374	-0.0676538	0.0917202	0	0	0	0.0562619	0.0634122	0.0588853	0.0819094	0.0885844	0.107248	-0.108159	-0.0954364	-0.0888373	-0.102797	-0.0745418	-0.0883604	-0.0251342	0.0259747	0.0194564	-0.0202419
Q9NWV8	BABAM1	BRISC and BRCA1-A complex member 1 OS=Homo sapiens GN=BABAM1 PE=1 SV=1	55.9271	16	130	16	0	0	329	36.5	1.306e-07	0.081239	-0.091899	0.0108918	9.03301e-08	0.00697066	0.00026025	-0.173138	-0.0703472	0.102791	0	0	0	0.0785121	0.0798202	0.101316	0.101114	0.0743859	0.0522859	-0.100661	-0.0670958	-0.0739751	-0.163282	-0.0547901	-0.101655	-0.0818342	0.012659	0.00868771	0.0113286
P68366	TUBA4A	Tubulin alpha-4A chain OS=Homo sapiens GN=TUBA4A PE=1 SV=1	72.0982	32	3969	9	0	0	448	49.9	1.31273e-07	0.152553	-0.137287	0.0868956	1.27937e-07	0.150246	2.54664e-05	-0.28984	-0.0656579	0.224183	0	0	0	0.183293	0.165998	0.160512	0.149435	0.126736	0.129347	-0.226661	-0.225946	-0.140741	-0.119199	-0.0830257	-0.0835497	-0.0818861	0.0900693	0.071601	0.0990164
Q8WVM8	SCFD1	Sec1 family domain-containing protein 1 OS=Homo sapiens GN=SCFD1 PE=1 SV=4	55.1402	29	259	29	0	0	642	72.3	1.33737e-07	-0.127166	0.090123	-0.0724619	1.22351e-07	0.101947	3.45207e-05	0.217289	0.0547043	-0.162585	0	0	0	-0.143065	-0.103781	-0.159577	-0.105382	-0.129366	-0.121827	0.0520576	0.0472537	0.0283034	0.118032	0.119303	0.145851	0.12006	-0.0661915	-0.0896662	-0.061528
Q5VWZ2	LYPLAL1	Lysophospholipase-like protein 1 OS=Homo sapiens GN=LYPLAL1 PE=1 SV=3	55.2743	12	67	12	2	0	237	26.3	1.33806e-07	0.123585	-0.0422871	-0.00527963	1.09907e-07	2.74372e-05	0.139653	-0.165872	-0.128864	0.0370075	0	0	0	0.0643867	0.128313	0.141026	0.119755	0.130077	0.157951	-0.0322467	-0.0161661	-0.0644832	-0.0139508	-0.0322617	-0.0655468	-0.0713546	0.00645801	-0.0166459	-0.00565101
O60287	URB1	Nucleolar pre-ribosomal-associated protein 1 OS=Homo sapiens GN=URB1 PE=1 SV=4	42.7565	74	298	73	73	0	2271	254.2	1.34296e-07	-0.0722739	0.0770741	-0.0641588	2.25073e-07	0.89156	4.94334e-06	0.149348	0.0081151	-0.141233	0	0	0	-0.085874	-0.0644357	-0.118741	-0.0817141	-0.0470671	-0.0358116	0.0573738	0.0778862	0.0652599	0.0997769	0.0679617	0.0564003	0.11486	-0.0492774	-0.0579243	-0.0852748
Q29RF7	PDS5A	Sister chromatid cohesion protein PDS5 homolog A OS=Homo sapiens GN=PDS5A PE=1 SV=1	56.9185	77	557	69	38	11	1337	150.7	1.36232e-07	0.0883458	-0.0785681	0.0428395	1.187e-07	0.0730482	4.49231e-05	-0.166914	-0.0455063	0.121408	0	0	0	0.0691984	0.0976357	0.0835891	0.0887771	0.104773	0.0861012	-0.0271693	-0.0481654	-0.0598652	-0.0860391	-0.0931755	-0.105251	-0.130311	0.019668	0.0539292	0.0549215
P27540	ARNT	Aryl hydrocarbon receptor nuclear translocator OS=Homo sapiens GN=ARNT PE=1 SV=1	43.5995	22	62	19	0	3	789	86.6	1.36976e-07	0.144103	-0.119827	0.0504346	1.01774e-07	0.0177619	0.000130104	-0.26393	-0.0936685	0.170261	0	0	0	0.0963735	0.136716	0.163874	0.157759	0.149768	0.160129	-0.0740896	-0.0432041	-0.10827	-0.104162	-0.138415	-0.1729	-0.197746	0.041036	0.0292593	0.0810086
Q9NR28	DIABLO	Diablo homolog, mitochondrial OS=Homo sapiens GN=DIABLO PE=1 SV=1	67.364	15	144	15	0	0	239	27.1	1.37943e-07	-0.138158	0.140966	-0.0878347	1.52683e-07	0.291862	1.6195e-05	0.279124	0.0503231	-0.228801	0	0	0	-0.151473	-0.16572	-0.189063	-0.110078	-0.085954	-0.126659	0.0825891	0.100781	0.0776997	0.220448	0.191877	0.15531	0.158059	-0.0917475	-0.0633557	-0.108401
Q16527	CSRP2	Cysteine and glycine-rich protein 2 OS=Homo sapiens GN=CSRP2 PE=1 SV=3	62.6943	11	66	11	0	0	193	20.9	1.38009e-07	-0.174541	0.141008	-0.124494	1.62955e-07	0.381487	1.30121e-05	0.31555	0.0500473	-0.265502	0	0	0	-0.25323	-0.219681	-0.145441	-0.0954356	-0.142459	-0.191001	0.14737	0.143778	0.0743554	0.15158	0.194106	0.203937	0.0719304	-0.0979284	-0.154859	-0.120695
J3KR97	TBCD	Tubulin-specific chaperone D OS=Homo sapiens GN=TBCD PE=1 SV=1	58.7805	67	744	24	0	53	1230	136.5	1.40856e-07	0.160981	-0.122283	0.0543537	1.01305e-07	0.0123282	0.000179511	-0.283264	-0.106628	0.176637	0	0	0	0.176271	0.183332	0.185738	0.192507	0.119679	0.108361	-0.127743	-0.117791	-0.067279	-0.0408692	-0.132632	-0.185668	-0.183999	0.0745441	0.0278077	0.0607092
Q9BV44	THUMPD3	THUMP domain-containing protein 3 OS=Homo sapiens GN=THUMPD3 PE=1 SV=1	43.5897	24	120	24	3	0	507	57	1.42706e-07	0.0804674	-0.100886	0.0634821	2.07981e-07	0.712223	7.30493e-06	-0.181353	-0.0169853	0.164368	0	0	0	0.0709093	0.0861871	0.0650609	0.0748695	0.100766	0.0850115	-0.0408386	-0.0560379	-0.095761	-0.158512	-0.105714	-0.109848	-0.139487	0.0578604	0.0517513	0.0808347
Q9H2D6	TRIOBP	TRIO and F-actin-binding protein OS=Homo sapiens GN=TRIOBP PE=1 SV=3	20.0846	41	100	40	0	0	2365	261.2	1.43968e-07	-0.234058	0.116467	-0.0367202	9.23973e-08	0.000535858	0.00350546	0.350525	0.197338	-0.153187	0	0	0	-0.267804	-0.274059	-0.25703	-0.185781	-0.192534	-0.227141	0.0589625	0.0628159	0.0277489	0.109788	0.172213	0.165679	0.218059	-0.0143799	-0.0315041	-0.0642766
Q7Z2Z2	EFTUD1	Elongation factor Tu GTP-binding domain-containing protein 1 OS=Homo sapiens GN=EFTUD1 PE=1 SV=2	62.3214	55	390	55	1	0	1120	125.4	1.45174e-07	0.0706724	-0.0729865	0.0308165	1.2514e-07	0.0690581	5.02718e-05	-0.143659	-0.039856	0.103803	0	0	0	0.054853	0.0678107	0.0622792	0.0874659	0.0870282	0.0645975	-0.0384283	-0.0254817	-0.0785659	-0.074347	-0.0815013	-0.0983528	-0.114229	0.028996	0.0304322	0.0330212
P16870	CPE	Carboxypeptidase E OS=Homo sapiens GN=CPE PE=1 SV=1	3.57143	2	2	2	0	0	476	53.1	1.4592e-07	0.430996	-0.664537	0.231528	1.60644e-07	0.288251	1.73442e-05	-1.09553	-0.199468	0.896064	1	0	1	0.485504	0.27466	0.252491	0.713206	0.529804	0.330308	-0.446186	-0.875737	-0.772884	-0.889488	-0.585234	-0.379072	-0.703157	0.168991	0.314852	0.21074
O95391	SLU7	Pre-mRNA-splicing factor SLU7 OS=Homo sapiens GN=SLU7 PE=1 SV=2	51.8771	24	89	24	19	0	586	68.3	1.46233e-07	-0.148042	0.0329601	0.0684712	4.91627e-07	9.8772e-07	0.286033	0.181002	0.216514	0.0355111	0	0	0	-0.155599	-0.104552	-0.188227	-0.144521	-0.126813	-0.168543	0.0147091	0.00461437	0.0148901	0.104118	-0.00251867	0.0386976	0.0562102	0.0768123	0.0839727	0.0446287
Q9Y3D2	MSRB2	Methionine-R-sulfoxide reductase B2, mitochondrial OS=Homo sapiens GN=MSRB2 PE=1 SV=2	61.5385	7	43	7	5	0	182	19.5	1.47658e-07	-0.166191	0.0272078	0.137791	2.86696e-06	2.51913e-07	0.00433297	0.193398	0.303982	0.110584	0	1	0	-0.149477	-0.17099	-0.214012	-0.16432	-0.15189	-0.146455	0.00181298	0.0368632	-0.0285157	0.119652	0.00747541	-0.00751261	0.0606796	0.170436	0.148035	0.0949027
Q5T4B2	CERCAM	Probable inactive glycosyltransferase 25 family member 3 OS=Homo sapiens GN=CERCAM PE=2 SV=1	8.7395	5	10	5	0	0	595	67.5	1.48812e-07	-0.331322	0.202037	-0.118259	1.03822e-07	0.00847366	0.000260876	0.533359	0.213063	-0.320296	1	0	0	-0.383113	-0.343868	-0.412991	-0.346476	-0.303832	-0.197651	0.138277	0.182561	0.10079	0.205308	0.18329	0.207664	0.396371	-0.0385636	-0.143818	-0.172394
P04040	CAT	Catalase OS=Homo sapiens GN=CAT PE=1 SV=3	66.7932	30	217	30	30	0	527	59.7	1.49054e-07	0.158266	-0.173958	0.148858	2.7476e-07	0.970117	4.42242e-06	-0.332224	-0.00940777	0.322816	0	0	0	0.130331	0.159066	0.157556	0.153824	0.153824	0.194995	-0.157108	-0.175751	-0.114607	-0.0326356	-0.235483	-0.253369	-0.248748	0.150386	0.154183	0.142006
Q9H477	RBKS	Ribokinase OS=Homo sapiens GN=RBKS PE=1 SV=1	9.31677	3	5	3	0	0	322	34.1	1.49342e-07	0.105869	-0.197218	0.16758	7.30105e-07	0.300111	1.03031e-06	-0.303087	0.0617111	0.364798	0	0	1	0.113761	0.132191	0.11963	0.0644866	0.114113	0.0910329	-0.175151	-0.3061	-0.287369	-0.213839	-0.137694	-0.0906646	-0.169711	0.194205	0.135787	0.172748
G1UD79	SPACIA2	Protein FAM122B OS=Homo sapiens GN=SPACIA2 PE=1 SV=1	31.0861	6	22	6	0	0	267	29.2	1.50623e-07	0.0976485	-0.100058	0.0647509	1.73636e-07	0.352557	1.52125e-05	-0.197706	-0.0328977	0.164808	0	0	0	0.0888946	0.129472	0.0864078	0.127169	0.0670551	0.0868925	-0.0744657	-0.0693238	-0.0431029	-0.147939	-0.135754	-0.0929207	-0.136897	0.0860845	0.0574266	0.0507414
P19022	CDH2	Cadherin-2 OS=Homo sapiens GN=CDH2 PE=1 SV=4	35.7616	25	177	25	1	0	906	99.7	1.51922e-07	-0.223055	0.174084	-0.163347	1.83903e-07	0.4249	1.30805e-05	0.397139	0.0597075	-0.337432	0	0	0	-0.215718	-0.233834	-0.284464	-0.19119	-0.198961	-0.214162	0.084636	0.0774765	0.105183	0.225383	0.166475	0.263311	0.296125	-0.15527	-0.133277	-0.201494
O00411	POLRMT	DNA-directed RNA polymerase, mitochondrial OS=Homo sapiens GN=POLRMT PE=1 SV=2	55.7724	50	203	50	31	0	1230	138.5	1.52514e-07	-0.118331	0.0800348	-0.0476807	1.1312e-07	0.0183367	0.00014448	0.198366	0.0706503	-0.127716	0	0	0	-0.138344	-0.129618	-0.14777	-0.112336	-0.0871055	-0.0948123	0.0849681	0.0835229	0.0689098	0.159212	0.0353412	0.0530154	0.0752746	-0.0281481	-0.051059	-0.0638349
Q9NUL5	C19orf66	UPF0515 protein C19orf66 OS=Homo sapiens GN=C19orf66 PE=1 SV=2	13.0584	3	4	3	0	0	291	33.1	1.54078e-07	0.218857	-0.224879	0.189906	2.47907e-07	0.850307	6.14313e-06	-0.443736	-0.0289512	0.414785	1	0	1	0.218047	0.246828	0.211195	0.198949	0.202046	0.236076	-0.237834	-0.20326	-0.114272	-0.194073	-0.212304	-0.449028	-0.163385	0.200568	0.224154	0.144995
Q52LR7	EPC2	Enhancer of polycomb homolog 2 OS=Homo sapiens GN=EPC2 PE=1 SV=2	22.6766	14	28	12	9	2	807	91	1.55056e-07	-0.13961	0.0896439	-0.00185563	1.01028e-07	0.000318299	0.00710949	0.229253	0.137754	-0.0914996	0	0	0	-0.12706	-0.136	-0.160566	-0.137531	-0.14981	-0.12669	0.0482835	0.0310797	0.0867224	0.109608	0.0741246	0.114814	0.162875	0.042942	-0.0475323	-0.000976599
Q96GQ5	C16orf58	RUS1 family protein C16orf58 OS=Homo sapiens GN=C16orf58 PE=1 SV=2	33.547	15	63	15	0	0	468	51	1.55064e-07	-0.0946979	0.08075	-0.131742	7.83659e-07	0.280461	1.0294e-06	0.175448	-0.0370445	-0.212492	0	0	0	-0.144818	-0.0947918	-0.102583	-0.043288	-0.0789082	-0.103798	0.0732285	0.0967237	0.0527861	0.150649	0.0880638	0.0478687	0.0559306	-0.111435	-0.137337	-0.146455
O75843	AP1G2	AP-1 complex subunit gamma-like 2 OS=Homo sapiens GN=AP1G2 PE=1 SV=1	12.9936	9	29	8	3	0	785	87.1	1.5594e-07	0.197687	-0.125559	0.0321902	1.00164e-07	0.00128351	0.00155763	-0.323247	-0.165497	0.157749	0	0	0	0.173236	0.165778	0.178303	0.141002	0.210821	0.316985	-0.136141	-0.150001	-0.153582	-0.182346	-0.105417	-0.116993	-0.0344354	0.0232905	0.0316705	0.0416095
Q8TDN6	BRIX1	Ribosome biogenesis protein BRX1 homolog OS=Homo sapiens GN=BRIX1 PE=1 SV=2	64.8725	20	257	20	20	0	353	41.4	1.56117e-07	-0.10654	0.0912185	-0.0539594	1.38132e-07	0.0855675	4.65815e-05	0.197759	0.0525808	-0.145178	0	0	0	-0.118017	-0.11689	-0.161021	-0.102605	-0.0674456	-0.0732631	0.084314	0.0660243	0.0559689	0.147834	0.0664152	0.0878128	0.130161	-0.0565264	-0.0547074	-0.0506445
H7C2Q8	EBNA1BP2	EBNA1 binding protein 2, isoform CRA_d OS=Homo sapiens GN=EBNA1BP2 PE=1 SV=1	36.5651	17	146	17	0	0	361	40.7	1.57158e-07	-0.135829	0.0671523	-0.0635174	1.16557e-07	0.0185867	0.000148217	0.202981	0.0723113	-0.13067	0	0	0	-0.148394	-0.1285	-0.179672	-0.140149	-0.0992483	-0.119009	0.0556761	0.052689	0.0185341	0.12224	0.042312	0.0777806	0.100834	-0.0310721	-0.0638399	-0.0956401
Q12857-4	NFIA	Isoform 4 of Nuclear factor 1 A-type OS=Homo sapiens GN=NFIA	11.5523	6	15	3	0	0	554	60.9	1.58758e-07	0.221919	-0.298151	0.270553	4.77066e-07	0.744878	2.01185e-06	-0.52007	0.0486343	0.568705	1	0	1	0.134869	0.335352	0.293912	0.147104	0.203356	0.216921	-0.336244	-0.293541	-0.105208	-0.382899	-0.186035	-0.415372	-0.367759	0.287592	0.221308	0.30276
P48431	SOX2	Transcription factor SOX-2 OS=Homo sapiens GN=SOX2 PE=1 SV=1	60.8833	14	400	8	8	11	317	34.3	1.58815e-07	0.23306	-0.165813	0.0268013	1.01908e-07	0.00119593	0.00171687	-0.398873	-0.206259	0.192614	0	0	0	0.235056	0.241415	0.257401	0.237639	0.210049	0.216803	-0.0898515	-0.110796	-0.031884	-0.286473	-0.22177	-0.221	-0.198913	0.00850433	0.0242835	0.047616
Q9NPA0	EMC7	ER membrane protein complex subunit 7 OS=Homo sapiens GN=EMC7 PE=1 SV=1	51.2397	10	66	10	0	0	242	26.5	1.62159e-07	-0.179174	0.126898	-0.104317	1.50944e-07	0.121218	3.75509e-05	0.306072	0.0748566	-0.231215	0	0	0	-0.194699	-0.185114	-0.211491	-0.144455	-0.142786	-0.196498	0.0700492	0.0491064	0.0634131	0.143737	0.1715	0.16005	0.23043	-0.114208	-0.111072	-0.0876711
Q92791	LEPREL4	Synaptonemal complex protein SC65 OS=Homo sapiens GN=LEPREL4 PE=1 SV=1	35.6979	14	67	14	2	0	437	50.3	1.6271e-07	-0.19857	0.14487	-0.0832508	1.24891e-07	0.0269509	0.000115839	0.34344	0.115319	-0.228121	0	0	0	-0.227116	-0.216973	-0.227013	-0.199957	-0.153679	-0.166682	0.092446	0.0767848	0.0452623	0.156567	0.187645	0.247661	0.207724	-0.0761224	-0.0948454	-0.0787847
Q15003	NCAPH	Condensin complex subunit 2 OS=Homo sapiens GN=NCAPH PE=1 SV=3	69.3657	41	390	41	0	0	741	82.5	1.63136e-07	0.148092	-0.118115	0.0899824	1.62391e-07	0.179783	2.81301e-05	-0.266207	-0.0581101	0.208097	0	0	0	0.120054	0.156836	0.149709	0.156454	0.149741	0.155761	-0.0407179	-0.0659742	-0.0719402	-0.212592	-0.128982	-0.132017	-0.174582	0.0862597	0.0817025	0.101985
Q9UHG3	PCYOX1	Prenylcysteine oxidase 1 OS=Homo sapiens GN=PCYOX1 PE=1 SV=3	58.0198	22	154	22	0	0	505	56.6	1.63725e-07	-0.122366	0.064725	-0.0470914	1.13866e-07	0.00850922	0.000293111	0.187091	0.0752745	-0.111816	0	0	0	-0.149773	-0.127632	-0.122514	-0.0709942	-0.123005	-0.140277	0.0694664	0.0934561	0.0672844	-0.00952288	0.0741829	0.0631528	0.0950552	-0.0597019	-0.0366041	-0.0449683
O60832	DKC1	H/ACA ribonucleoprotein complex subunit 4 OS=Homo sapiens GN=DKC1 PE=1 SV=3	66.7315	34	319	34	10	0	514	57.6	1.64053e-07	-0.069068	0.0550097	0.00144078	1.05489e-07	0.000544484	0.00416886	0.124078	0.0705088	-0.053569	0	0	0	-0.0994327	-0.0438077	-0.0876315	-0.0496325	-0.0720853	-0.0618182	0.0460235	0.0421528	0.0508071	0.0757073	0.0299872	0.0519066	0.0884836	0.00498728	0.00788368	-0.00854862
Q9H6Y7	RNF167	E3 ubiquitin-protein ligase RNF167 OS=Homo sapiens GN=RNF167 PE=1 SV=1	23.1429	6	18	6	0	0	350	38.3	1.64265e-07	-0.215542	0.148821	-0.0572704	1.10416e-07	0.00489932	0.000472591	0.364363	0.158272	-0.206092	0	0	0	-0.301155	-0.193715	-0.176262	-0.23109	-0.219185	-0.171845	0.180543	0.121499	0.187811	0.258396	0.0347523	0.136669	0.122079	-0.018658	-0.0702551	-0.082898
J3KPD3	RBM7	RNA binding motif protein 7, isoform CRA_c OS=Homo sapiens GN=RBM7 PE=1 SV=1	43.8202	11	39	11	0	0	267	30.6	1.65956e-07	0.0782542	-0.0981203	0.0483048	1.89295e-07	0.343808	1.71688e-05	-0.176375	-0.0299494	0.146425	0	0	0	0.072272	0.0409895	0.0825808	0.0850054	0.124012	0.0646656	-0.0948478	-0.0696238	-0.151776	-0.141972	-0.0690577	-0.0780896	-0.0814756	0.0521039	0.0533787	0.0394319
Q8N3U4-2	STAG2	Isoform 2 of Cohesin subunit SA-2 OS=Homo sapiens GN=STAG2	51.4196	61	460	48	3	18	1268	145.7	1.67741e-07	0.0649493	-0.0766482	0.094137	8.26662e-07	0.299128	1.13808e-06	-0.141597	0.0291877	0.170785	0	0	0	0.0460318	0.0751213	0.0582826	0.0555089	0.0828638	0.0718872	-0.0379627	-0.0419784	-0.0454919	-0.0755537	-0.103261	-0.100004	-0.132285	0.0831626	0.099995	0.0992534
Q58A45	PAN3	PAB-dependent poly(A)-specific ribonuclease subunit PAN3 OS=Homo sapiens GN=PAN3 PE=1 SV=3	30.4397	21	47	2	0	19	887	95.6	1.6886e-07	0.0829658	-0.0545664	0.0622001	2.03885e-07	0.427951	1.44762e-05	-0.137532	-0.0207657	0.116767	0	0	0	0.0514208	0.0787278	0.051628	0.0897399	0.0960712	0.130207	-0.0783259	-0.0497518	-0.0600252	-0.0264511	-0.0639412	-0.0318438	-0.0716261	0.0676286	0.0584134	0.0605582
Q10713	PMPCA	Mitochondrial-processing peptidase subunit alpha OS=Homo sapiens GN=PMPCA PE=1 SV=2	60.7619	31	314	31	12	0	525	58.2	1.69173e-07	-0.051736	0.0600304	-0.0564241	4.09853e-07	0.93989	2.98383e-06	0.111766	-0.00468805	-0.116454	0	0	0	-0.0850444	-0.0575584	-0.0658946	-0.0288781	-0.0458155	-0.0272253	0.036184	0.0433019	0.0631638	0.0979503	0.0713679	0.054816	0.0534287	-0.0625024	-0.0521052	-0.0546647
Q9BVS4	RIOK2	Serine/threonine-protein kinase RIO2 OS=Homo sapiens GN=RIOK2 PE=1 SV=2	51.8116	24	103	24	0	0	552	63.2	1.69775e-07	-0.128859	0.00308784	0.118153	1.34649e-05	1.70907e-07	0.000436871	0.131947	0.247012	0.115065	0	0	0	-0.141014	-0.1215	-0.186216	-0.141154	-0.0899026	-0.0933661	-0.0143709	0.0218664	-0.0342073	-0.0273581	0.00936027	0.0478908	0.0184337	0.121374	0.143683	0.0894025
Q9GZR2	REXO4	RNA exonuclease 4 OS=Homo sapiens GN=REXO4 PE=1 SV=2	61.1374	24	136	24	4	0	422	46.6	1.69778e-07	-0.0961216	0.091653	-0.0738664	2.27321e-07	0.590303	1.07043e-05	0.187775	0.0222552	-0.165519	0	0	0	-0.116305	-0.078826	-0.142449	-0.0986721	-0.0575726	-0.0829055	0.130182	0.119528	0.112945	0.110441	0.036816	0.0486381	0.0830208	-0.0606182	-0.0727827	-0.0881984
Q9BQS8-4	FYCO1	Isoform 4 of FYVE and coiled-coil domain-containing protein 1 OS=Homo sapiens GN=FYCO1	44.4593	56	158	56	0	0	1498	168.8	1.72054e-07	0.128879	-0.102252	0.033316	1.18154e-07	0.00722211	0.000358369	-0.231131	-0.0955635	0.135568	0	0	0	0.106492	0.0940249	0.185584	0.125778	0.121586	0.139812	-0.0875792	-0.0931868	-0.0861086	-0.0364989	-0.113038	-0.181567	-0.117784	0.0530489	0.0118939	0.0350051
O00506	STK25	Serine/threonine-protein kinase 25 OS=Homo sapiens GN=STK25 PE=1 SV=1	38.0282	16	89	10	0	0	426	48.1	1.72089e-07	0.123609	-0.0440305	-0.0975945	1.00129e-06	6.51382e-07	0.0730466	-0.16764	-0.221204	-0.0535639	0	0	0	0.07895	0.154629	0.143634	0.119939	0.131545	0.112959	-0.0118157	-0.00232543	-0.0441781	-0.0344102	-0.0402304	-0.0550783	-0.120176	-0.085241	-0.122513	-0.085029
Q86TW2	ADCK1	Uncharacterized aarF domain-containing protein kinase 1 OS=Homo sapiens GN=ADCK1 PE=2 SV=2	26.9811	12	21	12	0	0	530	60.5	1.73826e-07	-0.191455	0.136145	-0.0870706	1.37679e-07	0.0372154	9.78598e-05	0.3276	0.104384	-0.223216	0	0	0	-0.203801	-0.220304	-0.20729	-0.181275	-0.187553	-0.148504	0.0275079	0.0662862	0.124069	0.170336	0.190307	0.14272	0.231789	-0.0942257	-0.046967	-0.120019
O75390	CS	Citrate synthase, mitochondrial OS=Homo sapiens GN=CS PE=1 SV=2	58.7983	24	604	24	0	0	466	51.7	1.74222e-07	-0.109366	0.0761392	-0.0853508	2.25087e-07	0.535299	1.21263e-05	0.185505	0.0240153	-0.16149	0	0	0	-0.0990225	-0.0981928	-0.111811	-0.11503	-0.0871342	-0.145005	0.0659275	0.0650629	0.0513323	0.153706	0.0516921	0.0668132	0.0784407	-0.0935481	-0.0432611	-0.119243
Q2TAY7	SMU1	WD40 repeat-containing protein SMU1 OS=Homo sapiens GN=SMU1 PE=1 SV=2	56.9201	22	387	22	7	0	513	57.5	1.7464e-07	-0.0345859	0.0422658	-0.0301324	2.88089e-07	0.882442	6.49182e-06	0.0768518	0.00445356	-0.0723982	0	0	0	-0.0507533	-0.0261633	-0.0464339	-0.019218	-0.0187735	-0.0461736	0.0453627	0.045152	0.0293666	0.0660293	0.0267773	0.0473774	0.0357958	-0.0383081	-0.0261127	-0.0259763
P07108-5	DBI	Isoform 5 of Acyl-CoA-binding protein OS=Homo sapiens GN=DBI	37.1622	5	102	5	0	0	148	16.5	1.75783e-07	0.171838	-0.190779	0.157672	3.10677e-07	0.945136	5.60885e-06	-0.362618	-0.0141668	0.348451	0	0	0	0.140768	0.201309	0.178404	0.154298	0.185467	0.170785	-0.071882	-0.119096	-0.20214	-0.253453	-0.173572	-0.180239	-0.335073	0.126019	0.207539	0.139457
Q9P2D0	IBTK	Inhibitor of Bruton tyrosine kinase OS=Homo sapiens GN=IBTK PE=1 SV=3	20.2513	24	46	24	0	0	1353	150.4	1.75894e-07	0.179135	-0.118965	0.0129733	1.12871e-07	0.000678356	0.00361658	-0.2981	-0.166162	0.131938	0	0	0	0.158374	0.189378	0.210494	0.154599	0.156347	0.205622	-0.201712	-0.177142	-0.139421	-0.104547	-0.0875063	-0.105055	-0.0173704	0.0430847	-0.0321939	0.028029
O75718	CRTAP	Cartilage-associated protein OS=Homo sapiens GN=CRTAP PE=1 SV=1	49.3766	20	149	20	1	0	401	46.5	1.75978e-07	-0.207888	0.157997	-0.11756	1.6287e-07	0.119947	4.13826e-05	0.365885	0.0903283	-0.275557	0	0	0	-0.221022	-0.216578	-0.231053	-0.202992	-0.184692	-0.190993	0.0979634	0.0727165	0.0485451	0.195807	0.179166	0.237114	0.274668	-0.112438	-0.117974	-0.122269
P27824-2	CANX	Isoform 2 of Calnexin OS=Homo sapiens GN=CANX	51.5152	42	695	33	0	11	627	71.5	1.76155e-07	-0.126426	0.0492427	-0.0626951	1.29353e-07	0.0175736	0.000177767	0.175669	0.0637313	-0.111938	0	0	0	-0.0907354	-0.13828	-0.136497	-0.0901746	-0.130785	-0.172087	0.0483253	0.0168569	0.0129887	0.0935425	0.0562002	0.045557	0.0712282	-0.0707679	-0.0452741	-0.0720434
Q9Y5K5	UCHL5	Ubiquitin carboxyl-terminal hydrolase isozyme L5 OS=Homo sapiens GN=UCHL5 PE=1 SV=3	75.076	20	172	3	0	29	329	37.6	1.76211e-07	0.102595	-0.0493716	-0.0171134	1.48071e-07	3.08479e-05	0.177491	-0.151967	-0.119709	0.0322582	0	0	0	0.0928583	0.112211	0.0941914	0.142764	0.103151	0.0703965	-0.0548041	-0.073046	-0.0592609	-0.00242979	-0.049911	-0.0384198	-0.0677298	-0.0204896	-0.0435568	0.0127062
Q9Y4G6	TLN2	Talin-2 OS=Homo sapiens GN=TLN2 PE=1 SV=4	58.1825	128	609	106	49	1	2542	271.4	1.76714e-07	0.0187241	0.0563418	-0.165609	0.0832544	1.5428e-06	1.35212e-07	0.0376177	-0.184333	-0.221951	0	0	0	0.00152208	0.00846835	0.0596196	0.0199875	0.0103739	0.012373	0.0778705	0.0576028	0.0423014	-0.0198779	0.0742028	0.0745578	0.087735	-0.152674	-0.181657	-0.162496
Q96GM5	SMARCD1	SWI/SNF-related matrix-associated actin-dependent regulator of chromatin subfamily D member 1 OS=Homo sapiens GN=SMARCD1 PE=1 SV=2	72.8155	37	228	28	0	14	515	58.2	1.77101e-07	-0.104359	0.0920238	-0.0730377	2.08293e-07	0.391894	1.64203e-05	0.196383	0.0313211	-0.165062	0	0	0	-0.110959	-0.117133	-0.111269	-0.100005	-0.081902	-0.104885	0.0618133	0.0740508	0.026184	0.160732	0.0904532	0.0891448	0.141788	-0.0724561	-0.0601758	-0.0864812
Q8TDY2	RB1CC1	RB1-inducible coiled-coil protein 1 OS=Homo sapiens GN=RB1CC1 PE=1 SV=3	43.0364	62	176	60	0	2	1594	183	1.78537e-07	0.0704922	-0.0450355	0.0224439	1.22295e-07	0.00707531	0.000382223	-0.115528	-0.0480482	0.0674795	0	0	0	0.0725673	0.0686082	0.0724583	0.0703982	0.0718591	0.0670621	-0.0279272	-0.0238052	-0.0450163	-0.101244	-0.0388762	-0.0476451	-0.0307349	0.0336629	0.0129528	0.0207162
Q5M775	SPECC1	Cytospin-B OS=Homo sapiens GN=SPECC1 PE=1 SV=1	41.0112	41	134	38	0	1	1068	118.5	1.78574e-07	-0.192374	0.122289	-0.117854	1.69431e-07	0.140272	3.73928e-05	0.314663	0.0745205	-0.240143	0	0	0	-0.213284	-0.207815	-0.229317	-0.162183	-0.148701	-0.192945	0.0949665	0.113603	0.0839165	0.0218576	0.160917	0.144889	0.235873	-0.115032	-0.0852986	-0.15323
O43310	CTIF	CBP80/20-dependent translation initiation factor OS=Homo sapiens GN=CTIF PE=1 SV=1	38.796	18	48	18	1	0	598	67.5	1.80663e-07	0.20084	-0.150436	0.0842275	1.39636e-07	0.0301887	0.000120096	-0.351276	-0.116613	0.234664	0	0	0	0.223576	0.172233	0.183918	0.240275	0.217398	0.167641	-0.067027	-0.0586878	-0.0774103	-0.189528	-0.211011	-0.225032	-0.224359	0.0813023	0.0799242	0.0914559
Q9BTE7	DCUN1D5	DCN1-like protein 5 OS=Homo sapiens GN=DCUN1D5 PE=1 SV=1	55.6962	10	67	9	0	0	237	27.5	1.81397e-07	0.0877907	-0.0305934	-0.0456613	4.54226e-07	1.79262e-06	0.568292	-0.118384	-0.133452	-0.0150679	0	0	0	0.0838792	0.108026	0.0456266	0.0971099	0.115015	0.0770874	0.00480596	-0.0375075	-0.0307576	-0.0304124	-0.0468615	-0.0262982	-0.0471227	-0.0639983	-0.048056	-0.0249295
Q96FL8-3	SLC47A1	Isoform 3 of Multidrug and toxin extrusion protein 1 OS=Homo sapiens GN=SLC47A1	9.21502	2	7	2	0	0	586	63.5	1.82855e-07	0.482414	-0.320312	0.179377	1.31408e-07	0.0138978	0.000224519	-0.802726	-0.303037	0.499689	1	1	1	0.466764	0.588732	0.436394	0.529312	0.446961	0.426317	-0.343606	-0.40623	-0.417078	0.0335786	-0.239711	-0.494971	-0.374169	0.102703	0.17693	0.258498
Q15628	TRADD	Tumor necrosis factor receptor type 1-associated DEATH domain protein OS=Homo sapiens GN=TRADD PE=1 SV=2	44.2308	9	22	9	2	0	312	34.2	1.83722e-07	0.180535	-0.0846437	0.0270262	1.18592e-07	0.000504131	0.00536516	-0.265179	-0.153509	0.11167	0	0	0	0.154851	0.1478	0.206246	0.189748	0.149666	0.2349	-0.0971611	-0.110146	-0.0144271	-0.061519	-0.0933318	-0.163	-0.0529205	0.0632253	-0.0155507	0.033404
Q8N138	ORMDL3	ORM1-like protein 3 OS=Homo sapiens GN=ORMDL3 PE=1 SV=1	19.6078	3	16	2	0	1	153	17.5	1.84019e-07	-0.27766	0.138201	-0.0713598	1.18871e-07	0.00186712	0.0013477	0.415861	0.2063	-0.209561	0	0	0	-0.354931	-0.200756	-0.31456	-0.253219	-0.303229	-0.239263	0.0968174	0.074231	0.0436465	0.268724	0.158876	0.120681	0.204433	-0.0354407	-0.120006	-0.0586328
O95347	SMC2	Structural maintenance of chromosomes protein 2 OS=Homo sapiens GN=SMC2 PE=1 SV=2	70.6767	88	779	88	3	0	1197	135.6	1.84372e-07	0.110505	-0.136473	0.0719817	2.19129e-07	0.410011	1.64458e-05	-0.246978	-0.038523	0.208455	0	0	0	0.106376	0.118715	0.090696	0.116893	0.114133	0.116217	-0.0973087	-0.100008	-0.0892743	-0.258597	-0.119791	-0.135925	-0.154406	0.0481763	0.0928712	0.0748976
Q9NX20	MRPL16	39S ribosomal protein L16, mitochondrial OS=Homo sapiens GN=MRPL16 PE=1 SV=1	42.6295	12	37	12	7	0	251	28.4	1.84784e-07	0.200671	-0.122941	-0.0640508	1.66158e-07	2.30663e-05	0.274681	-0.323612	-0.264722	0.0588907	0	0	0	0.178817	0.161405	0.188252	0.219836	0.235955	0.219759	-0.171943	-0.194017	-0.153686	0.0213345	-0.137434	-0.139938	-0.0849079	-0.0403439	-0.0664358	-0.0853727
Q17R89	ARHGAP44	Rho GTPase-activating protein 44 OS=Homo sapiens GN=ARHGAP44 PE=1 SV=1	5.62347	5	11	3	0	0	818	89.2	1.85735e-07	0.44205	-0.272231	0.0316227	1.19721e-07	0.000542419	0.00501793	-0.714281	-0.410427	0.303854	1	1	0	0.375318	0.426564	0.517819	0.457896	0.336472	0.538229	-0.389714	-0.37406	-0.357349	-0.248272	-0.245818	-0.333393	0.0429893	0.0511968	0.0202567	0.0234145
P33897	ABCD1	ATP-binding cassette sub-family D member 1 OS=Homo sapiens GN=ABCD1 PE=1 SV=2	20.1342	11	25	11	5	0	745	82.9	1.88483e-07	-0.42479	0.188461	-0.0933736	1.20796e-07	0.000930441	0.002839	0.613251	0.331417	-0.281834	1	1	0	-0.453753	-0.419379	-0.439574	-0.415464	-0.401891	-0.41868	0.052443	0.125004	-0.000568158	0.149218	0.352198	0.309294	0.331637	-0.0829222	-0.0961517	-0.101047
O43399	TPD52L2	Tumor protein D54 OS=Homo sapiens GN=TPD52L2 PE=1 SV=2	87.3786	20	186	4	0	19	206	22.2	1.88754e-07	-0.0851818	0.0478075	-0.0608361	2.07001e-07	0.298768	2.20288e-05	0.132989	0.0243457	-0.108644	0	0	0	-0.100073	-0.0749536	-0.102701	-0.079742	-0.0424119	-0.11121	0.0570013	0.0590541	0.00261877	0.0399238	0.0669343	0.0634933	0.0456269	-0.0657167	-0.0476248	-0.0691669
Q9NVN8	GNL3L	Guanine nucleotide-binding protein-like 3-like protein OS=Homo sapiens GN=GNL3L PE=1 SV=1	58.9347	28	128	27	27	0	582	65.5	1.90701e-07	-0.218278	0.0988139	0.00786352	1.39857e-07	8.04126e-05	0.055575	0.317092	0.226142	-0.0909504	0	0	0	-0.2381	-0.219029	-0.275968	-0.24666	-0.162559	-0.167354	0.183095	0.189385	0.0642342	0.0871034	0.0281631	0.0599128	0.079804	-0.000151027	0.0169848	0.00675677
I3L448	ATPAF1	ATP synthase mitochondrial F1 complex assembly factor 1 OS=Homo sapiens GN=ATPAF1 PE=1 SV=1	33.6182	12	69	12	0	0	351	38.8	1.91596e-07	-0.176696	0.109422	-0.0871222	1.53397e-07	0.0426054	9.88338e-05	0.286118	0.0895736	-0.196544	0	0	0	-0.18287	-0.174129	-0.206652	-0.189263	-0.140664	-0.166596	0.0471441	0.0454541	0.0304239	0.173518	0.14947	0.161151	0.158794	-0.0993731	-0.0696761	-0.0923174
Q32MZ4	LRRFIP1	Leucine-rich repeat flightless-interacting protein 1 OS=Homo sapiens GN=LRRFIP1 PE=1 SV=2	55.5693	35	323	1	0	59	808	89.2	1.94282e-07	0.100232	-0.147836	0.0913835	3.47318e-07	0.95487	5.99093e-06	-0.248067	-0.00884808	0.239219	0	0	0	0.0625767	0.128056	0.0981724	0.103035	0.108044	0.101505	-0.167952	-0.155917	-0.179029	-0.246281	-0.0689364	-0.0819554	-0.13478	0.0908704	0.085617	0.097663
Q9H936	SLC25A22	Mitochondrial glutamate carrier 1 OS=Homo sapiens GN=SLC25A22 PE=1 SV=1	74.9226	19	136	19	6	0	323	34.4	1.9557e-07	-0.0526473	0.0585605	-0.081723	1.236e-06	0.17689	1.01982e-06	0.111208	-0.0290757	-0.140284	0	0	0	-0.073505	-0.0570038	-0.0393281	-0.0579037	-0.0656833	-0.02246	0.0714713	0.0285129	0.0558702	0.02527	0.0526231	0.0796584	0.0965177	-0.0722702	-0.092972	-0.0799269
Q66GS9	CEP135	Centrosomal protein of 135 kDa OS=Homo sapiens GN=CEP135 PE=1 SV=2	45.5263	48	87	48	41	0	1140	133.4	1.95964e-07	0.050691	-0.070783	0.0651604	6.54022e-07	0.639625	2.10824e-06	-0.121474	0.0144694	0.135943	0	0	0	0.049745	0.0500949	0.0529005	0.0567765	0.0466696	0.0479596	-0.0805473	-0.0347758	-0.0641544	-0.032496	-0.0907347	-0.119856	-0.0729169	0.0781109	0.0735942	0.0437762
Q969G2	LHX4	LIM/homeobox protein Lhx4 OS=Homo sapiens GN=LHX4 PE=1 SV=2	6.66667	3	5	3	2	0	390	43.1	1.96274e-07	0.337236	-0.363998	0.0863871	1.45303e-07	0.020237	0.000181024	-0.701235	-0.250849	0.450385	1	0	1	0.26724	0.340886	0.354772	0.339665	0.342906	0.377949	-0.366471	-0.279138	-0.145263	-0.390435	-0.341405	-0.669389	-0.355885	0.16767	0.0326355	0.0588555
Q5TH69	ARFGEF3	Brefeldin A-inhibited guanine nucleotide-exchange protein 3 OS=Homo sapiens GN=ARFGEF3 PE=1 SV=3	15.8475	27	64	27	27	0	2177	240.5	1.97986e-07	-0.156996	0.0741441	-0.00119549	1.37694e-07	0.000137852	0.0290249	0.23114	0.155801	-0.0753396	0	0	0	-0.150111	-0.183632	-0.188595	-0.145608	-0.129616	-0.144417	0.0701189	0.0575052	0.00522676	0.0338842	0.10611	0.12233	0.123834	0.0337541	-0.0393207	0.00198016
Q6NUK1	SLC25A24	Calcium-binding mitochondrial carrier protein SCaMC-1 OS=Homo sapiens GN=SLC25A24 PE=1 SV=2	54.0881	23	122	23	0	0	477	53.3	1.99477e-07	-0.130747	0.114297	-0.157047	6.32658e-07	0.692615	2.29867e-06	0.245044	-0.0262999	-0.271344	0	0	0	-0.154806	-0.168216	-0.136334	-0.0764921	-0.106751	-0.141881	0.0693565	0.0439527	0.0502497	0.153207	0.16777	0.134147	0.181395	-0.159958	-0.16532	-0.145862
Q9NZJ6	COQ3	Hexaprenyldihydroxybenzoate methyltransferase, mitochondrial OS=Homo sapiens GN=COQ3 PE=1 SV=3	18.4282	5	16	5	0	0	369	41	2.00008e-07	0.260256	-0.210725	0.130931	1.73499e-07	0.0811519	6.38389e-05	-0.47098	-0.129325	0.341656	1	0	0	0.252693	0.272995	0.245192	0.261738	0.2753	0.253614	-0.239572	-0.220329	-0.193205	0.0202719	-0.256799	-0.345953	-0.239488	0.148977	0.106303	0.137512
F8W703	ROBO2	Roundabout homolog 2 OS=Homo sapiens GN=ROBO2 PE=1 SV=1	17.6511	17	27	15	0	0	1439	157.3	2.01101e-07	-0.271964	0.226801	-0.241504	3.27552e-07	0.873057	7.58509e-06	0.498765	0.0304598	-0.468305	1	0	1	-0.267543	-0.408712	-0.373978	-0.179469	-0.197837	-0.204245	0.181236	0.16584	0.094669	0.274556	0.244957	0.331106	0.295241	-0.170347	-0.269715	-0.28445
Q8NEJ9	NGDN	Neuroguidin OS=Homo sapiens GN=NGDN PE=1 SV=1	38.7302	11	62	11	0	0	315	35.9	2.01494e-07	-0.124631	0.0854863	-0.126427	4.26149e-07	0.997434	4.44283e-06	0.210117	-0.00179588	-0.211913	0	0	0	-0.0840921	-0.115526	-0.148583	-0.120761	-0.128577	-0.150248	0.11213	0.0765809	0.094231	0.178259	0.0354551	0.0403697	0.061379	-0.127843	-0.14002	-0.111418
O60907	TBL1X	F-box-like/WD repeat-containing protein TBL1X OS=Homo sapiens GN=TBL1X PE=1 SV=3	55.1127	22	171	15	0	0	577	62.5	2.05405e-07	0.0832193	-0.0908701	0.0502043	2.21002e-07	0.279425	2.54047e-05	-0.174089	-0.033015	0.141074	0	0	0	0.0709421	0.0696647	0.0644563	0.0857281	0.0829152	0.125609	-0.138603	-0.0690145	-0.0888139	-0.0790321	-0.086841	-0.138687	-0.0350998	0.0606411	0.0390722	0.0508995
Q16512-2	PKN1	Isoform 2 of Serine/threonine-protein kinase N1 OS=Homo sapiens GN=PKN1	59.4937	43	224	40	0	0	948	104.6	2.06857e-07	0.0563716	-0.0830836	0.0862255	1.05008e-06	0.288087	1.33978e-06	-0.139455	0.0298539	0.169309	0	0	0	0.0653611	0.056226	0.0235904	0.0475377	0.0861239	0.0593903	-0.0657592	-0.0237081	-0.0881191	-0.121915	-0.0915051	-0.121699	-0.0688805	0.0897059	0.0850307	0.08394
Q9H223	EHD4	EH domain-containing protein 4 OS=Homo sapiens GN=EHD4 PE=1 SV=1	75.6007	35	210	28	2	3	541	61.1	2.07413e-07	0.0722589	-0.0776505	0.0239864	1.63281e-07	0.0379644	0.000118298	-0.149909	-0.0482725	0.101637	0	0	0	0.0507585	0.0893728	0.0551463	0.0757354	0.0771351	0.0854051	-0.0691961	-0.0640253	-0.107446	-0.134779	-0.058477	-0.0584451	-0.0511851	0.0120639	0.0148148	0.0450805
Q9NXS2	QPCTL	Glutaminyl-peptide cyclotransferase-like protein OS=Homo sapiens GN=QPCTL PE=1 SV=2	22.5131	6	11	6	2	0	382	42.9	2.08635e-07	-0.202959	0.2012	-0.199356	4.12208e-07	0.997193	5.21652e-06	0.404159	0.0036032	-0.400556	0	0	1	-0.206451	-0.216754	-0.129747	-0.221691	-0.283083	-0.160029	0.191983	0.185765	0.187837	0.299541	0.251195	0.0216273	0.270455	-0.160367	-0.221298	-0.216402
Q9NY26	SLC39A1	Zinc transporter ZIP1 OS=Homo sapiens GN=SLC39A1 PE=1 SV=1	3.7037	1	3	1	0	0	324	34.2	2.1015e-07	-0.377577	0.135185	-0.2271	1.75023e-07	0.0610492	8.36244e-05	0.512762	0.150477	-0.362285	1	0	1	-0.438225	-0.340186	-0.341218	-0.41142	-0.349499	-0.384913	0.0936529	0.125629	-0.0180247	0.226425	0.157045	0.132107	0.229465	-0.155692	-0.391253	-0.134354
F2Z2X4	XPO4	Exportin-4 OS=Homo sapiens GN=XPO4 PE=1 SV=1	44.4831	39	195	38	0	1	1151	130.1	2.10538e-07	0.0703277	-0.0422421	0.0791627	5.90477e-07	0.817522	2.8877e-06	-0.11257	0.00883501	0.121405	0	0	0	0.0470406	0.0729507	0.045987	0.0775607	0.0850336	0.0933935	-0.055534	-0.0203703	-0.0493204	-0.0548197	-0.0377445	-0.0735425	-0.00436322	0.0789891	0.0686958	0.0898033
H3BTN5	PKM	Pyruvate kinase (Fragment) OS=Homo sapiens GN=PKM PE=1 SV=1	76.0825	46	3097	5	1	0	485	53	2.11195e-07	-0.166887	0.115578	-0.0848639	1.77034e-07	0.0642871	8.08701e-05	0.282465	0.0820229	-0.200442	0	0	0	-0.224648	-0.196346	-0.152349	-0.183985	-0.111725	-0.132267	0.165441	0.138423	0.0117306	0.167056	0.12422	0.13291	0.0692652	-0.0820012	-0.0915479	-0.0810427
O15239	NDUFA1	NADH dehydrogenase [ubiquinone] 1 alpha subcomplex subunit 1 OS=Homo sapiens GN=NDUFA1 PE=1 SV=1	17.1429	2	3	2	2	0	70	8.1	2.1177e-07	0.229339	-0.235798	0.156771	2.51482e-07	0.417841	1.86243e-05	-0.465137	-0.0725684	0.392569	1	0	1	0.263034	0.244516	0.212575	0.228951	0.242099	0.184859	-0.226015	-0.296355	-0.305892	-0.0776491	-0.176822	-0.222081	-0.345775	0.181233	0.259447	0.0296328
Q9NUB1	ACSS1	Acetyl-coenzyme A synthetase 2-like, mitochondrial OS=Homo sapiens GN=ACSS1 PE=1 SV=2	45.7184	23	84	23	0	0	689	74.8	2.1186e-07	0.225081	-0.212549	0.10616	1.84951e-07	0.0865975	6.48122e-05	-0.43763	-0.118922	0.318708	1	0	0	0.264928	0.215062	0.228446	0.222773	0.184065	0.235214	-0.176091	-0.228829	-0.172242	-0.0282531	-0.263895	-0.294419	-0.324113	0.149483	0.0499456	0.119051
Q9H2K8	TAOK3	Serine/threonine-protein kinase TAO3 OS=Homo sapiens GN=TAOK3 PE=1 SV=2	29.3987	28	82	23	3	0	898	105.3	2.1262e-07	0.0609224	-0.047592	0.0819777	9.85078e-07	0.349732	1.51854e-06	-0.108514	0.0210553	0.12957	0	0	0	0.0552143	0.0501012	0.0518715	0.0715172	0.0795187	0.0573115	-0.0617498	-0.061141	-0.0822628	-0.0187419	-0.00650171	-0.0687441	-0.0340031	0.077832	0.0776284	0.0904725
Q9UBD5	ORC3	Origin recognition complex subunit 3 OS=Homo sapiens GN=ORC3 PE=1 SV=1	57.384	38	203	2	0	45	711	82.2	2.16425e-07	0.0858922	-0.0334883	0.00926137	1.45546e-07	0.000229469	0.0174272	-0.119381	-0.0766308	0.0427497	0	0	0	0.0724502	0.0846431	0.0720046	0.108862	0.0833875	0.0940061	0.00228676	-0.0340243	-0.013966	-0.0328853	-0.0556079	-0.0352842	-0.0649375	0.00661779	-0.00820653	0.0293729
J3KQL8	APOL2	Apolipoprotein L2 OS=Homo sapiens GN=APOL2 PE=1 SV=2	21.6036	9	22	9	1	0	449	48.9	2.16602e-07	0.190537	-0.212425	0.212528	5.50051e-07	0.905341	3.46071e-06	-0.402962	0.0219914	0.424953	0	0	1	0.221577	0.181561	0.192325	0.1596	0.155963	0.232195	-0.257927	-0.188784	-0.168768	-0.380908	-0.158991	-0.255967	-0.0756313	0.242329	0.140628	0.254628
Q9UHP3	USP25	Ubiquitin carboxyl-terminal hydrolase 25 OS=Homo sapiens GN=USP25 PE=1 SV=4	30.6161	26	56	26	1	0	1055	122.1	2.17547e-07	0.144123	-0.0247038	-0.0989725	2.20301e-06	5.31175e-07	0.0207657	-0.168827	-0.243096	-0.0742687	0	0	0	0.1984	0.113914	0.138305	0.131769	0.128755	0.153596	-0.0278338	-0.0130873	0.0293178	-0.0267686	-0.0430823	-0.0580162	-0.0334562	-0.0349773	-0.144753	-0.117188
P56378	MP68	6.8 kDa mitochondrial proteolipid OS=Homo sapiens GN=MP68 PE=1 SV=1	27.5862	2	31	2	0	0	58	6.7	2.1812e-07	0.152733	-0.0653347	-0.0481896	2.59353e-07	9.75626e-06	0.7837	-0.218068	-0.200923	0.0171452	0	0	0	0.119145	0.185474	0.210184	0.101586	0.114893	0.185116	-0.10866	-0.0899344	-0.0604862	-0.0765592	-0.025259	-0.0556897	-0.0407545	-0.0867002	-0.0245097	-0.0333587
G8JLB6	HNRNPH1	Heterogeneous nuclear ribonucleoprotein H OS=Homo sapiens GN=HNRNPH1 PE=1 SV=1	62.9237	27	1512	12	1	24	472	51.2	2.20209e-07	-0.102557	0.0268291	0.0754956	1.65133e-06	6.66768e-07	0.0420813	0.129386	0.178052	0.0486665	0	0	0	-0.123016	-0.0787233	-0.118466	-0.120263	-0.117413	-0.0574566	0.00497426	0.00863697	0.0112786	0.0732954	0.00689143	0.0246497	0.0580772	0.0869142	0.0648175	0.074755
Q6ZRY4	RBPMS2	RNA-binding protein with multiple splicing 2 OS=Homo sapiens GN=RBPMS2 PE=1 SV=1	37.3206	10	56	7	6	0	209	22.5	2.22898e-07	-0.164593	0.145198	-0.0781909	1.91515e-07	0.0787495	7.36845e-05	0.309792	0.0864024	-0.223389	0	0	0	-0.061169	-0.225776	-0.228844	-0.141668	-0.127305	-0.202799	0.140023	0.129559	0.158345	0.226324	0.107838	0.113859	0.140439	-0.0568061	-0.0568587	-0.120908
P42785	PRCP	Lysosomal Pro-X carboxypeptidase OS=Homo sapiens GN=PRCP PE=1 SV=1	28.4274	11	77	11	0	0	496	55.8	2.24097e-07	-0.136226	0.0436237	0.0805112	7.75289e-07	1.42292e-06	0.282849	0.17985	0.216737	0.0368875	0	0	0	-0.166003	-0.111638	-0.180873	-0.120643	-0.119524	-0.118676	0.0150696	0.0321814	0.0165742	0.12722	0.0573635	0.0436715	0.0132861	0.0820553	0.0959771	0.0635013
Q9Y3A4	RRP7A	Ribosomal RNA-processing protein 7 homolog A OS=Homo sapiens GN=RRP7A PE=1 SV=2	52.5	14	84	14	7	0	280	32.3	2.24517e-07	-0.193943	0.0897874	-0.108949	1.84664e-07	0.0567477	9.52679e-05	0.28373	0.0849936	-0.198736	0	0	0	-0.210461	-0.177996	-0.260792	-0.159769	-0.139028	-0.215609	0.104972	0.130337	0.067293	0.00257101	0.0781935	0.0887056	0.15644	-0.117096	-0.0594921	-0.150258
Q9BY50	SEC11C	Signal peptidase complex catalytic subunit SEC11C OS=Homo sapiens GN=SEC11C PE=1 SV=3	21.3542	4	7	4	0	0	192	21.5	2.25222e-07	0.186845	-0.244558	0.126142	2.80313e-07	0.49342	1.69911e-05	-0.431404	-0.060703	0.370701	1	0	1	0.20772	0.155728	0.212865	0.173104	0.210388	0.161268	-0.199896	-0.188474	-0.0849518	-0.203451	-0.329361	-0.382808	-0.322966	0.0866215	0.144952	0.146854
Q9Y4D1	DAAM1	Disheveled-associated activator of morphogenesis 1 OS=Homo sapiens GN=DAAM1 PE=1 SV=2	31.9109	31	55	31	0	0	1078	123.4	2.25252e-07	-0.381552	0.276285	-0.308228	3.08054e-07	0.640453	1.29757e-05	0.657837	0.073324	-0.584513	1	0	1	-0.414189	-0.43618	-0.378965	-0.327732	-0.330231	-0.402014	0.163371	0.140357	0.0585977	0.269001	0.416335	0.419849	0.466483	-0.312561	-0.277023	-0.335099
P54274	TERF1	Telomeric repeat-binding factor 1 OS=Homo sapiens GN=TERF1 PE=1 SV=3	38.4966	15	38	15	1	0	439	50.2	2.25471e-07	-0.122783	0.0251635	0.0970289	2.83273e-06	4.79375e-07	0.0130633	0.147947	0.219812	0.0718655	0	0	0	-0.1434	-0.0927827	-0.171312	-0.108145	-0.109755	-0.111304	0.0335865	0.0486531	-0.0130951	0.0329048	-0.0100463	0.0209044	0.063237	0.0727241	0.144557	0.073806
Q86V59	PNMAL1	PNMA-like protein 1 OS=Homo sapiens GN=PNMAL1 PE=1 SV=2	38.4966	13	26	13	4	0	439	48.1	2.25524e-07	-0.194236	0.100615	-0.0765451	1.57619e-07	0.0107518	0.000359222	0.294851	0.117691	-0.17716	0	0	0	-0.228923	-0.173529	-0.150549	-0.207427	-0.231141	-0.173848	0.161837	0.118014	0.111025	0.18201	0.0277411	0.047111	0.0565686	-0.029052	-0.108003	-0.0925801
Q9NZC9	SMARCAL1	SWI/SNF-related matrix-associated actin-dependent regulator of chromatin subfamily A-like protein 1 OS=Homo sapiens GN=SMARCAL1 PE=1 SV=1	29.4549	21	52	21	0	0	954	105.9	2.2668e-07	0.069422	-0.0638349	0.107445	1.59164e-06	0.143807	1.06195e-06	-0.133257	0.0380231	0.17128	0	0	0	0.02788	0.0878939	0.0747821	0.0622243	0.0635681	0.100184	-0.0573047	-0.0409223	-0.101478	-0.0222214	-0.0786352	-0.0936652	-0.0526182	0.110593	0.0833699	0.128372
O60725	ICMT	Protein-S-isoprenylcysteine O-methyltransferase OS=Homo sapiens GN=ICMT PE=1 SV=1	9.85915	2	12	2	2	0	284	31.9	2.27014e-07	-0.165638	0.155244	-0.02593	1.52644e-07	0.00585846	0.000612039	0.320882	0.139708	-0.181174	0	0	0	-0.230175	-0.107158	-0.181842	-0.175614	-0.206608	-0.0924338	0.0814482	0.118666	0.240072	0.175196	0.141376	0.146587	0.183361	0.0236806	-0.0741847	-0.0272858
Q8NCW5	APOA1BP	NAD(P)H-hydrate epimerase OS=Homo sapiens GN=APOA1BP PE=1 SV=2	59.7222	14	206	14	0	0	288	31.7	2.28039e-07	0.163725	-0.0794307	-0.023017	1.84084e-07	4.83224e-05	0.141794	-0.243156	-0.186742	0.0564137	0	0	0	0.124813	0.170693	0.146081	0.170961	0.156724	0.213077	-0.0619452	-0.0234615	-0.0550155	-0.0312985	-0.0868021	-0.140335	-0.157157	-0.00918534	-0.0328926	-0.026973
P52948	NUP98	Nuclear pore complex protein Nup98-Nup96 OS=Homo sapiens GN=NUP98 PE=1 SV=4	40.8365	68	481	68	0	0	1817	197.5	2.32104e-07	-0.0647488	0.0351951	-0.0584439	3.74778e-07	0.868073	8.79834e-06	0.0999439	0.0063049	-0.093639	0	0	0	-0.0760638	-0.0708465	-0.0835168	-0.0565386	-0.0410929	-0.0604342	0.00470237	0.0289633	0.014081	0.0359515	0.0520564	0.0487278	0.0618833	-0.0636975	-0.0462699	-0.0653643
Q9UPW5	AGTPBP1	Cytosolic carboxypeptidase 1 OS=Homo sapiens GN=AGTPBP1 PE=1 SV=3	30.3426	31	72	31	0	0	1226	138.4	2.32323e-07	0.0898205	-0.0382578	0.0184346	1.49271e-07	0.000832734	0.00430487	-0.128078	-0.071386	0.0566924	0	0	0	0.0832559	0.076732	0.0678164	0.114118	0.108648	0.0883532	-0.0440564	-0.023788	-0.00510844	-0.0244208	-0.0325364	-0.0693197	-0.068575	0.0253817	0.0294619	0.000460048
Q9H334	FOXP1	Forkhead box protein P1 OS=Homo sapiens GN=FOXP1 PE=1 SV=1	34.8597	14	103	13	0	0	677	75.3	2.32558e-07	0.20754	-0.295063	0.253852	6.89257e-07	0.764239	2.9147e-06	-0.502603	0.0463122	0.548915	1	0	1	0.19388	0.226488	0.203276	0.20725	0.212608	0.201738	-0.257633	-0.300303	-0.218435	-0.0480318	-0.415526	-0.397004	-0.428511	0.263905	0.243462	0.25419
O15270	SPTLC2	Serine palmitoyltransferase 2 OS=Homo sapiens GN=SPTLC2 PE=1 SV=1	69.573	38	209	38	14	0	562	62.9	2.33435e-07	-0.0777733	-0.000204309	0.0403395	3.48923e-06	4.4816e-07	0.0091811	0.077569	0.118113	0.0405438	0	0	0	-0.0887773	-0.0852064	-0.0838594	-0.0723153	-0.0670194	-0.0694616	-0.0111686	-0.00951538	-0.01498	-0.0252997	0.0081013	0.00847296	0.0429592	0.0465897	0.0379342	0.0364946
Q08357	SLC20A2	Sodium-dependent phosphate transporter 2 OS=Homo sapiens GN=SLC20A2 PE=1 SV=1	13.4969	5	14	5	5	0	652	70.3	2.33456e-07	-0.293918	0.172858	-0.163902	2.00746e-07	0.0805134	7.62912e-05	0.466776	0.130016	-0.336761	1	0	0	-0.298182	-0.308543	-0.357618	-0.251353	-0.212093	-0.335717	0.0778086	0.112667	0.0491487	0.155278	0.256727	0.256974	0.301405	-0.153293	-0.122102	-0.216311
Q5BJH7	YIF1B	Protein YIF1B OS=Homo sapiens GN=YIF1B PE=1 SV=1	35.0318	6	20	6	0	0	314	34.4	2.36814e-07	-0.212668	0.159777	0.00626121	1.53585e-07	0.00053436	0.00726486	0.372445	0.218929	-0.153516	0	0	0	-0.24804	-0.245445	-0.27403	-0.201565	-0.169529	-0.1374	0.120796	0.127817	0.0434332	0.247455	0.20585	0.197857	0.175231	-0.0352931	0.069346	-0.0152692
P26358-2	DNMT1	Isoform 2 of DNA (cytosine-5)-methyltransferase 1 OS=Homo sapiens GN=DNMT1	64.7059	111	881	2	0	167	1632	184.7	2.3783e-07	0.0680779	-0.0587989	0.0299169	1.9514e-07	0.0569163	0.000101469	-0.126877	-0.038161	0.0887158	0	0	0	0.0341663	0.08672	0.0428599	0.0684359	0.0965	0.0797853	-0.0409416	-0.0394022	-0.0498675	-0.0973175	-0.0649755	-0.0708946	-0.0481935	0.0310112	0.0221771	0.0365623
Q9BZQ6	EDEM3	ER degradation-enhancing alpha-mannosidase-like protein 3 OS=Homo sapiens GN=EDEM3 PE=1 SV=2	27.897	18	36	18	0	0	932	104.6	2.38455e-07	0.166817	-0.154334	0.0607	1.84895e-07	0.0350928	0.000147818	-0.321151	-0.106117	0.215034	0	0	0	0.163144	0.151761	0.136038	0.164845	0.166905	0.218208	-0.152161	-0.209863	-0.128795	-0.0175904	-0.235175	-0.19155	-0.145204	0.0984228	0.0454438	0.0382334
Q92979	EMG1	Ribosomal RNA small subunit methyltransferase NEP1 OS=Homo sapiens GN=EMG1 PE=1 SV=4	79.0984	18	142	18	0	0	244	26.7	2.38841e-07	-0.062632	0.100047	-0.0804926	7.62401e-07	0.689401	2.68812e-06	0.162679	-0.0178607	-0.18054	0	0	0	-0.0759274	-0.059311	-0.0805104	-0.0476148	-0.0501776	-0.0622506	0.086258	0.0628479	0.0503554	0.167281	0.0951537	0.0924046	0.14603	-0.0776951	-0.0934462	-0.0703365
Q9HB71	CACYBP	Calcyclin-binding protein OS=Homo sapiens GN=CACYBP PE=1 SV=2	70.1754	18	313	18	0	0	228	26.2	2.39831e-07	0.180638	-0.101239	-0.00648945	1.64964e-07	0.000184647	0.0266651	-0.281877	-0.187128	0.0947498	0	0	0	0.187096	0.193314	0.227794	0.156701	0.178951	0.139973	-0.05961	-0.075301	-0.106439	-0.0416855	-0.108777	-0.0907546	-0.226108	-0.0340236	0.00756132	0.00699395
Q9NVA1	UQCC1	Ubiquinol-cytochrome-c reductase complex assembly factor 1 OS=Homo sapiens GN=UQCC1 PE=1 SV=3	21.4047	8	32	8	0	0	299	34.6	2.40141e-07	0.121339	-0.0864497	-0.0556544	2.34609e-07	2.05286e-05	0.432133	-0.207788	-0.176993	0.0307952	0	0	0	0.118796	0.116901	0.109744	0.164243	0.127227	0.0911202	-0.126159	-0.143701	-0.114939	-0.0316988	-0.0961718	-0.0592284	-0.0332504	-0.0752472	-0.0420343	-0.0496817
Q13015	MLLT11	Protein AF1q OS=Homo sapiens GN=MLLT11 PE=1 SV=1	91.1111	5	36	5	5	0	90	10.1	2.41625e-07	0.138791	-0.172404	0.209152	1.28892e-06	0.264556	1.46942e-06	-0.311195	0.070361	0.381556	0	0	1	0.16196	0.14911	0.143127	0.0909013	0.129116	0.158532	-0.283073	-0.208436	-0.188119	-0.24586	-0.137789	-0.107021	-0.0365325	0.201055	0.18882	0.237581
Q6MZP7	LIN54	Protein lin-54 homolog OS=Homo sapiens GN=LIN54 PE=1 SV=3	42.0561	22	60	22	0	0	749	79.4	2.43327e-07	0.0590248	-0.068665	0.0845509	1.15277e-06	0.338904	1.6788e-06	-0.12769	0.0255261	0.153216	0	0	0	0.050526	0.0500469	0.0395577	0.061492	0.0751477	0.0773786	-0.0706612	-0.0107028	-0.106028	-0.0570567	-0.0614025	-0.110793	-0.06401	0.0811388	0.0876	0.0849139
D6RIF6	SLAIN2	SLAIN motif-containing protein 2 OS=Homo sapiens GN=SLAIN2 PE=1 SV=1	50.9662	17	92	1	0	0	414	44.6	2.46447e-07	0.380914	-0.428123	-0.0152586	1.59821e-07	0.00252041	0.00149243	-0.809037	-0.396173	0.412865	1	1	1	0.232225	0.385804	0.566157	0.390855	0.281462	0.428983	-0.236474	-0.554589	-0.220688	-0.384495	-0.571595	-0.545895	-0.483126	-0.0660702	-0.0842689	0.104563
Q96SZ6-3	CDK5RAP1	Isoform 3 of CDK5 regulatory subunit-associated protein 1 OS=Homo sapiens GN=CDK5RAP1	49.9148	28	75	28	0	0	587	66.1	2.48377e-07	-0.11896	0.100957	0.0172909	1.64105e-07	0.000349994	0.0127825	0.219917	0.136251	-0.0836661	0	0	0	-0.13385	-0.0911758	-0.198404	-0.11616	-0.0778194	-0.0963483	0.096605	0.0753054	0.073386	0.108456	0.0803081	0.0991092	0.173529	0.02042	0.0190274	0.0124253
Q13574	DGKZ	Diacylglycerol kinase zeta OS=Homo sapiens GN=DGKZ PE=1 SV=3	25.1567	19	39	19	0	0	1117	124.1	2.48932e-07	0.08502	-0.0425957	0.00944499	1.61805e-07	0.000520182	0.00805403	-0.127616	-0.075575	0.0520406	0	0	0	0.0749924	0.0401888	0.0781038	0.0931429	0.10204	0.121652	-0.0567221	-0.053069	-0.0363011	-0.0507292	-0.0368168	-0.0450092	-0.0195221	0.0223915	-0.0133179	0.0192614
A6NGB9	WIPF3	WAS/WASL-interacting protein family member 3 OS=Homo sapiens GN=WIPF3 PE=2 SV=4	50.9317	21	103	21	1	0	483	49.4	2.50799e-07	0.200652	-0.171362	0.107208	2.29623e-07	0.125148	5.89611e-05	-0.372014	-0.0934442	0.27857	0	0	0	0.298045	0.158887	0.171284	0.174479	0.176855	0.224364	-0.232923	-0.189113	-0.174157	-0.288678	-0.0706288	-0.152717	-0.0913162	0.138023	0.0742072	0.109395
O60610	DIAPH1	Protein diaphanous homolog 1 OS=Homo sapiens GN=DIAPH1 PE=1 SV=2	57.3113	68	554	67	0	0	1272	141.3	2.51498e-07	0.0772089	-0.0790434	0.0558661	3.16882e-07	0.519651	1.80474e-05	-0.156252	-0.0213427	0.13491	0	0	0	0.0778642	0.0755864	0.0486096	0.0946806	0.0874695	0.0790428	-0.045008	-0.0427925	-0.0443869	-0.11409	-0.0821373	-0.0965394	-0.12835	0.0448685	0.0473932	0.0753367
Q4U2R6	MRPL51	39S ribosomal protein L51, mitochondrial OS=Homo sapiens GN=MRPL51 PE=1 SV=1	30.4688	3	17	3	1	0	128	15.1	2.51911e-07	0.19997	-0.0874294	-0.0715434	3.21847e-07	9.09071e-06	0.889318	-0.287399	-0.271513	0.015886	0	1	0	0.214359	0.230066	0.134008	0.156662	0.238825	0.225899	-0.102252	-0.151901	-0.13961	-0.0422714	-0.0517656	-0.0824314	-0.041774	-0.0740893	0.000522763	-0.141064
Q96CG3	TIFA	TRAF-interacting protein with FHA domain-containing protein A OS=Homo sapiens GN=TIFA PE=1 SV=1	29.3478	7	17	7	7	0	184	21.4	2.53155e-07	0.191878	-0.194365	0.0726779	2.04506e-07	0.0514161	0.000117779	-0.386243	-0.1192	0.267043	0	0	0	0.138924	0.216982	0.19861	0.170046	0.137311	0.289392	-0.248536	-0.224761	-0.301292	-0.124625	-0.163135	-0.202457	-0.0957494	0.115183	0.00935966	0.0934905
O00622	CYR61	Protein CYR61 OS=Homo sapiens GN=CYR61 PE=1 SV=1	60.8924	19	60	19	3	0	381	42	2.53675e-07	-1.38695	0.536701	-1.11036	3.12487e-07	0.485279	1.94629e-05	1.92365	0.276594	-1.64706	1	0	1	-1.28855	-1.55595	-1.6079	-1.13884	-1.12543	-1.60503	0.281037	0.218239	0.220176	0.0669249	1.01758	1.04491	0.908038	-1.22912	-0.93082	-1.17113
P45974-2	USP5	Isoform Short of Ubiquitin carboxyl-terminal hydrolase 5 OS=Homo sapiens GN=USP5	57.2455	52	387	50	1	2	835	93.2	2.53881e-07	0.0570011	-0.075543	0.0698188	7.65594e-07	0.748058	3.08055e-06	-0.132544	0.0128176	0.145362	0	0	0	0.0377724	0.0673496	0.0493251	0.057316	0.0568856	0.0733581	-0.0447375	-0.0392186	-0.081804	-0.07864	-0.0699042	-0.0796499	-0.134847	0.0739512	0.0431395	0.0923655
P18858-3	LIG1	Isoform 3 of DNA ligase 1 OS=Homo sapiens GN=LIG1	70.1577	57	335	1	0	0	888	98.2	2.54166e-07	0.0974348	-0.21973	0.0778402	4.11921e-07	0.874949	9.46148e-06	-0.317165	-0.0195946	0.29757	0	0	0	0.0646919	0.0929502	0.133911	0.115531	0.130918	0.0466073	-0.181302	-0.177561	-0.297306	-0.251114	-0.179339	-0.131912	-0.319573	0.0394389	0.132512	0.0615703
G5E9E7	TJP1	Tight junction protein 1 (Zona occludens 1), isoform CRA_e OS=Homo sapiens GN=TJP1 PE=1 SV=1	51.5957	77	407	75	0	2	1692	189.6	2.54301e-07	-0.105763	0.0555389	-0.0493242	1.90749e-07	0.0261694	0.000200836	0.161302	0.0564388	-0.104863	0	0	0	-0.138483	-0.0897146	-0.134951	-0.0953301	-0.0928434	-0.0832555	0.0201196	0.0221643	0.0322538	0.0562994	0.0925559	0.0897874	0.0755921	-0.0342767	-0.0632415	-0.0504544
Q13163	MAP2K5	Dual specificity mitogen-activated protein kinase kinase 5 OS=Homo sapiens GN=MAP2K5 PE=1 SV=2	23.6607	9	33	9	0	0	448	50.1	2.54531e-07	0.123803	-0.0954195	0.0487368	1.93307e-07	0.0296355	0.000182158	-0.219223	-0.0750664	0.144156	0	0	0	0.147779	0.128314	0.157302	0.0789601	0.0756339	0.15483	-0.107368	-0.0727101	-0.0728548	-0.141007	-0.0548739	-0.145833	-0.0732891	0.0627671	0.0110702	0.0723733
Q9NXR8	ING3	Inhibitor of growth protein 3 OS=Homo sapiens GN=ING3 PE=1 SV=2	24.1627	8	24	8	0	0	418	46.7	2.56386e-07	-0.178477	0.0855379	-0.017973	1.68111e-07	0.000423429	0.0106813	0.264015	0.160504	-0.103511	0	0	0	-0.180972	-0.223221	-0.205022	-0.183641	-0.149013	-0.128996	0.0801597	0.0697465	-0.0166162	0.15654	0.0774099	0.119037	0.112489	-0.015228	-0.0036448	-0.0350461
Q13823	GNL2	Nucleolar GTP-binding protein 2 OS=Homo sapiens GN=GNL2 PE=1 SV=1	48.5636	36	160	36	25	0	731	83.6	2.58198e-07	-0.153958	0.0696783	0.0677666	3.85049e-07	6.36293e-06	0.997258	0.223636	0.221725	-0.0019117	0	0	0	-0.177172	-0.134165	-0.189222	-0.186398	-0.117202	-0.11959	0.107884	0.10186	0.0827181	0.0608288	-0.0343764	0.075235	0.093598	0.0743802	0.0606174	0.0683022
O95202	LETM1	LETM1 and EF-hand domain-containing protein 1, mitochondrial OS=Homo sapiens GN=LETM1 PE=1 SV=1	54.5332	38	391	37	32	0	739	83.3	2.58401e-07	-0.071309	0.0806382	-0.117043	1.94112e-06	0.12721	1.13059e-06	0.151947	-0.0457342	-0.197681	0	0	0	-0.0824339	-0.050859	-0.0739149	-0.0538393	-0.0618094	-0.104997	0.0599355	0.0543411	0.0342199	0.152645	0.0801899	0.0728336	0.110303	-0.122559	-0.0950674	-0.133504
Q9HCK1	ZDBF2	DBF4-type zinc finger-containing protein 2 OS=Homo sapiens GN=ZDBF2 PE=1 SV=3	7.73152	18	34	18	1	0	2354	265.5	2.64882e-07	-0.270968	0.141111	-0.0814642	1.74748e-07	0.00429078	0.000990758	0.412079	0.189504	-0.222575	0	0	0	-0.309887	-0.303051	-0.22236	-0.329728	-0.241116	-0.219666	0.0675789	0.235202	0.0532234	0.0593684	0.245738	0.108054	0.218614	-0.0582817	-0.0902644	-0.0958466
Q10471	GALNT2	Polypeptide N-acetylgalactosaminyltransferase 2 OS=Homo sapiens GN=GALNT2 PE=1 SV=1	58.1436	33	163	32	15	1	571	64.7	2.66155e-07	0.0529366	0.0486181	-0.233852	0.979951	4.94413e-07	4.44285e-07	-0.00431845	-0.286788	-0.28247	0	1	0	0.0371595	0.0141802	0.0602465	0.104562	0.0655704	0.0359003	0.019788	0.023989	-0.0124606	0.0525342	0.119308	0.018778	0.11839	-0.237027	-0.246629	-0.217899
Q15843	NEDD8	NEDD8 OS=Homo sapiens GN=NEDD8 PE=1 SV=1	45.679	4	265	4	1	0	81	9.1	2.68397e-07	0.0787523	-0.0559356	0.0297087	1.96894e-07	0.0212027	0.000253548	-0.134688	-0.0490435	0.0856443	0	0	0	0.0632327	0.068034	0.0954308	0.0661254	0.0770945	0.102596	-0.0343403	-0.041684	-0.0356808	-0.0718988	-0.0351586	-0.0920893	-0.0806975	0.0576987	0.0045052	0.0269222
Q6PID6	TTC33	Tetratricopeptide repeat protein 33 OS=Homo sapiens GN=TTC33 PE=1 SV=2	47.7099	10	45	10	10	0	262	29.4	2.69383e-07	0.183476	-0.162948	0.0765962	2.17668e-07	0.0527938	0.000123856	-0.346424	-0.10688	0.239544	0	0	0	0.184146	0.147323	0.180296	0.191729	0.20675	0.190611	-0.0632638	-0.098883	-0.104088	-0.126481	-0.233925	-0.261397	-0.252597	0.0789118	0.0749658	0.075911
Q13325	IFIT5	Interferon-induced protein with tetratricopeptide repeats 5 OS=Homo sapiens GN=IFIT5 PE=1 SV=1	47.7178	21	100	20	4	1	482	55.8	2.69604e-07	0.0817521	-0.0735243	0.032965	2.15467e-07	0.048209	0.000133021	-0.155276	-0.0487871	0.106489	0	0	0	0.0651761	0.116074	0.0482678	0.0660421	0.11086	0.0840929	-0.0898268	-0.0380949	-0.102252	-0.0687131	-0.0445481	-0.0604536	-0.110782	0.0201293	0.0342057	0.0445602
P08581	MET	Hepatocyte growth factor receptor OS=Homo sapiens GN=MET PE=1 SV=4	22.518	22	55	22	0	0	1390	155.4	2.70351e-07	0.179546	-0.118729	0.114576	2.69128e-07	0.204934	4.34966e-05	-0.298275	-0.06497	0.233305	0	0	0	0.152152	0.21013	0.15994	0.136258	0.171211	0.247586	-0.155145	-0.0425567	-0.140315	-0.0511549	-0.0948212	-0.216077	-0.131032	0.155097	0.089854	0.0987779
Q9Y3B9	RRP15	RRP15-like protein OS=Homo sapiens GN=RRP15 PE=1 SV=2	45.0355	15	126	15	15	0	282	31.5	2.71203e-07	-0.128995	0.0715065	-0.0835678	2.6391e-07	0.182	4.79446e-05	0.200501	0.0454269	-0.155074	0	0	0	-0.141979	-0.0820922	-0.170816	-0.138703	-0.0972985	-0.143079	0.114119	0.0542558	0.0729058	0.0727064	0.00222183	0.0676571	0.11668	-0.104379	-0.0680526	-0.0782714
Q6UVK1	CSPG4	Chondroitin sulfate proteoglycan 4 OS=Homo sapiens GN=CSPG4 PE=1 SV=2	5.72782	8	12	8	8	0	2322	250.4	2.73448e-07	-0.215174	0.222146	-0.0641985	2.06727e-07	0.029244	0.000200241	0.437319	0.150975	-0.286344	1	0	0	-0.151399	-0.262769	-0.27672	-0.235105	-0.234039	-0.131009	0.125852	0.168112	0.218289	0.398063	0.178955	0.191711	0.274039	-0.0308225	-0.0980698	-0.063703
P33121	ACSL1	Long-chain-fatty-acid--CoA ligase 1 OS=Homo sapiens GN=ACSL1 PE=1 SV=1	62.3209	38	263	37	0	2	698	77.9	2.73667e-07	0.118229	-0.0846155	0.00399952	1.76167e-07	0.000859805	0.00524229	-0.202845	-0.11423	0.088615	0	0	0	0.101071	0.12396	0.103091	0.135833	0.11707	0.128351	-0.0346024	-0.0505075	-0.0878759	-0.0296512	-0.127791	-0.146227	-0.115655	0.00890114	-0.00519578	0.00829319
Q15714	TSC22D1	TSC22 domain family protein 1 OS=Homo sapiens GN=TSC22D1 PE=1 SV=3	21.9944	15	77	10	0	8	1073	109.6	2.74421e-07	-0.129453	0.0871809	-0.0943274	3.19484e-07	0.40554	2.491e-05	0.216634	0.035126	-0.181508	0	0	0	-0.168882	-0.172376	-0.16338	-0.0886764	-0.0795146	-0.103891	0.0849177	0.133401	0.0445682	0.0492923	0.127696	0.104808	0.0655828	-0.120017	-0.0860225	-0.0769423
Q9NV88	INTS9	Integrator complex subunit 9 OS=Homo sapiens GN=INTS9 PE=1 SV=2	35.1064	22	101	22	0	0	658	73.8	2.75565e-07	0.0881612	-0.0792733	0.125001	1.42377e-06	0.287664	1.71627e-06	-0.167434	0.03684	0.204274	0	0	0	0.0599808	0.12095	0.0564307	0.0848942	0.0985678	0.108144	-0.0984988	-0.0890723	-0.0651065	0.00892944	-0.107331	-0.106622	-0.0972117	0.126995	0.109984	0.138025
O60313-2	OPA1	Isoform 2 of Dynamin-like 120 kDa protein, mitochondrial OS=Homo sapiens GN=OPA1	67.7031	65	385	65	0	0	997	115.8	2.7624e-07	-0.112551	0.0704799	-0.0520605	2.1422e-07	0.0373978	0.000166814	0.183031	0.0604907	-0.12254	0	0	0	-0.128399	-0.108596	-0.125689	-0.0896794	-0.091094	-0.131849	0.0769857	0.0689352	0.0628086	0.155677	0.0617041	0.0302029	0.0370457	-0.050918	-0.043734	-0.0615295
P55786	NPEPPS	Puromycin-sensitive aminopeptidase OS=Homo sapiens GN=NPEPPS PE=1 SV=2	63.0033	51	587	51	0	0	919	103.2	2.78661e-07	0.0548917	-0.0741669	0.0729189	1.00778e-06	0.568686	2.62245e-06	-0.129059	0.0180272	0.147086	0	0	0	0.0335694	0.0709033	0.0431698	0.066397	0.060954	0.0543567	-0.0627014	-0.0889423	-0.116947	-0.0752509	-0.0451905	-0.0274461	-0.10269	0.0553445	0.0678613	0.0955509
Q99590	SCAF11	Protein SCAF11 OS=Homo sapiens GN=SCAF11 PE=1 SV=2	34.9282	41	191	39	0	2	1463	164.6	2.80509e-07	-0.076993	0.049549	-0.0508255	2.87541e-07	0.239123	3.99445e-05	0.126542	0.0261676	-0.100375	0	0	0	-0.119999	-0.0708698	-0.0845587	-0.0438349	-0.0565151	-0.0861805	0.0254972	0.0462614	0.0757337	0.070389	0.0612446	0.0275767	0.0401408	-0.0556897	-0.0413619	-0.0554249
Q969M3-3	YIPF5	Isoform 3 of Protein YIPF5 OS=Homo sapiens GN=YIPF5	7.92453	2	18	2	0	0	265	29.1	2.81264e-07	-0.228892	0.143458	-0.0853203	2.00156e-07	0.0152016	0.000352539	0.37235	0.143571	-0.228778	0	0	0	-0.336931	-0.195845	-0.180416	-0.232266	-0.224596	-0.203297	0.132764	0.123121	0.052313	0.231325	0.191879	0.221824	0.0509802	-0.0750181	-0.0837028	-0.0972401
Q9ULH7-5	MKL2	Isoform 5 of MKL/myocardin-like protein 2 OS=Homo sapiens GN=MKL2	32.5751	25	64	13	0	14	1099	119.1	2.81972e-07	0.0509267	-0.12448	0.176319	1.47354e-05	0.00301112	3.96098e-07	-0.175406	0.125392	0.300798	0	0	0	0.00245809	0.0665093	0.0415924	0.0260733	0.0370827	0.131844	-0.0714275	-0.0836324	-0.152704	-0.0851263	-0.185306	-0.127381	-0.165779	0.197804	0.14693	0.184222
Q15836	VAMP3	Vesicle-associated membrane protein 3 OS=Homo sapiens GN=VAMP3 PE=1 SV=3	53	6	57	3	3	5	100	11.3	2.82083e-07	-0.120461	0.0868156	-0.0991354	3.96231e-07	0.693532	1.47427e-05	0.207276	0.0213254	-0.185951	0	0	0	-0.105304	-0.122341	-0.145026	-0.126734	-0.0978953	-0.125465	0.140742	0.093641	0.125232	0.00393131	0.0615283	0.0552275	0.127408	-0.0901695	-0.0793933	-0.127843
Q9Y6M5	SLC30A1	Zinc transporter 1 OS=Homo sapiens GN=SLC30A1 PE=1 SV=3	34.1223	12	63	12	12	0	507	55.3	2.83606e-07	-0.169437	0.116057	-0.0277766	1.83552e-07	0.00249188	0.0018215	0.285495	0.141661	-0.143834	0	0	0	-0.170245	-0.172017	-0.188301	-0.187825	-0.154499	-0.143737	0.0747207	0.0822103	0.0862255	0.253177	0.106099	0.0730756	0.136893	0.0103348	-0.0409939	-0.0526707
Q14139-2	UBE4A	Isoform 2 of Ubiquitin conjugation factor E4 A OS=Homo sapiens GN=UBE4A	39.6086	34	170	34	0	0	1073	123.4	2.85319e-07	0.0611811	-0.0562391	0.0196629	2.12799e-07	0.0259973	0.000231282	-0.11742	-0.0415182	0.0759021	0	0	0	0.0416135	0.0295797	0.0466729	0.074306	0.0871946	0.0877201	-0.0645426	-0.0383972	-0.0827361	-0.0389251	-0.0478127	-0.0704514	-0.0508089	0.0134181	0.0296103	0.0159603
Q9H2Y7	ZNF106	Zinc finger protein 106 OS=Homo sapiens GN=ZNF106 PE=1 SV=1	33.9352	50	117	23	0	29	1883	208.8	2.87106e-07	-0.147655	0.0986373	-0.0993268	3.02913e-07	0.274805	3.65097e-05	0.246293	0.0483284	-0.197964	0	0	0	-0.145686	-0.165231	-0.202916	-0.122871	-0.117891	-0.131336	0.081132	0.105578	0.0583282	0.0807538	0.0880227	0.0607215	0.215925	-0.103437	-0.0807274	-0.113816
Q9UPN3-5	MACF1	Isoform 4 of Microtubule-actin cross-linking factor 1, isoforms 1/2/3/5 OS=Homo sapiens GN=MACF1	28.9828	136	349	3	0	2	5938	669.7	2.87205e-07	-0.426805	0.316537	-0.344061	3.92243e-07	0.652472	1.6145e-05	0.743341	0.0827437	-0.660597	1	0	1	-0.359916	-0.537745	-0.483689	-0.388614	-0.371899	-0.418966	0.170842	0.163778	0.121528	0.257373	0.474994	0.489286	0.537955	-0.315771	-0.30272	-0.413691
Q86UY6	NAA40	N-alpha-acetyltransferase 40 OS=Homo sapiens GN=NAA40 PE=2 SV=1	54.0084	11	41	11	0	0	237	27.2	2.87539e-07	-0.214825	0.129403	-0.134603	2.75204e-07	0.168872	5.41348e-05	0.344229	0.0802221	-0.264006	0	0	0	-0.209196	-0.269996	-0.2979	-0.205943	-0.153672	-0.152245	0.120612	0.151383	0.0196212	0.0693992	0.145866	0.205607	0.193334	-0.150455	-0.113855	-0.139499
P07237	P4HB	Protein disulfide-isomerase OS=Homo sapiens GN=P4HB PE=1 SV=3	73.622	43	833	5	0	62	508	57.1	2.88117e-07	-0.210368	0.137298	-0.145812	3.13098e-07	0.3127	3.28753e-05	0.347666	0.0645564	-0.283109	0	0	0	-0.203726	-0.198595	-0.262588	-0.202393	-0.164367	-0.230539	0.0718993	0.058844	0.0621653	0.102922	0.201507	0.219163	0.244583	-0.152863	-0.114441	-0.170131
Q9NZD2	GLTP	Glycolipid transfer protein OS=Homo sapiens GN=GLTP PE=1 SV=3	59.3301	10	35	10	1	0	209	23.8	2.91204e-07	0.16108	-0.149329	0.128881	4.07783e-07	0.690704	1.5287e-05	-0.310409	-0.0321989	0.27821	0	0	0	0.131062	0.170887	0.146532	0.16907	0.172311	0.17662	-0.0785305	-0.0838793	-0.160027	-0.0622134	-0.195425	-0.201678	-0.26355	0.113823	0.104193	0.168628
Q96HE7	ERO1L	ERO1-like protein alpha OS=Homo sapiens GN=ERO1L PE=1 SV=2	65.1709	27	198	26	9	1	468	54.4	2.92961e-07	-0.0289342	0.0686527	-0.111426	2.74901e-05	0.00127109	3.36778e-07	0.097587	-0.0824915	-0.180078	0	0	0	-0.065868	0.0141148	-0.0327208	-0.0266078	-0.0359797	-0.0265437	0.073585	0.0880345	0.12126	0.0545587	0.053376	0.0421806	0.0475741	-0.0997219	-0.119066	-0.115489
Q8N2H4	SYS1	Protein SYS1 homolog OS=Homo sapiens GN=SYS1 PE=1 SV=1	5.76923	1	7	1	0	0	156	17.6	2.92985e-07	-0.243357	0.116885	-0.156598	2.75023e-07	0.152115	5.99596e-05	0.360241	0.0867582	-0.273483	0	0	0	-0.223386	-0.28341	-0.274979	-0.217158	-0.177927	-0.28328	0.0749194	0.0461425	-0.0061222	0.201608	0.153026	0.208284	0.140333	-0.167962	-0.153429	-0.148403
Q9BSH4	TACO1	Translational activator of cytochrome c oxidase 1 OS=Homo sapiens GN=TACO1 PE=1 SV=1	56.9024	14	106	14	14	0	297	32.5	2.93753e-07	-0.106065	0.12204	-0.11203	6.6183e-07	0.977996	5.5809e-06	0.228105	-0.00596474	-0.23407	0	0	0	-0.121169	-0.0894548	-0.145029	-0.0821319	-0.0977799	-0.100827	0.0563886	0.0648701	0.100082	0.16894	0.131527	0.118808	0.213664	-0.129777	-0.0812318	-0.125081
Q6P9H4	CNKSR3	Connector enhancer of kinase suppressor of ras 3 OS=Homo sapiens GN=CNKSR3 PE=1 SV=1	26.8468	11	25	2	0	10	555	61.9	2.94844e-07	0.110235	-0.197156	0.141389	9.03691e-07	0.733978	3.45156e-06	-0.30739	0.0311548	0.338545	0	0	0	0.116236	0.0613971	0.0688566	0.143667	0.155975	0.115276	-0.0898725	-0.14512	-0.150763	-0.262163	-0.253077	-0.194289	-0.284806	0.14178	0.191615	0.0907726
H7C2N1	PTMA	Prothymosin alpha (Fragment) OS=Homo sapiens GN=PTMA PE=1 SV=1	16.8919	5	400	5	0	0	148	15.8	2.98487e-07	0.148257	-0.148834	0.059921	2.46668e-07	0.0656029	0.000117537	-0.29709	-0.0883356	0.208755	0	0	0	0.205658	0.107846	0.187751	0.123005	0.137077	0.128203	-0.101256	-0.0890154	-0.0965964	-0.116875	-0.168199	-0.233901	-0.235995	0.0575869	0.0490849	0.0730911
P11182	DBT	Lipoamide acyltransferase component of branched-chain alpha-keto acid dehydrogenase complex, mitochondrial OS=Homo sapiens GN=DBT PE=1 SV=3	62.6556	27	117	27	6	0	482	53.5	2.99219e-07	-0.107915	0.0944189	-0.054879	2.66964e-07	0.112382	7.76643e-05	0.202334	0.0530357	-0.149298	0	0	0	-0.126103	-0.0924087	-0.128465	-0.088047	-0.111422	-0.101041	0.0958271	0.055118	0.0533568	0.167157	0.0767144	0.106743	0.106015	0.0018064	-0.0848824	-0.081561
Q7L7V1	DHX32	Putative pre-mRNA-splicing factor ATP-dependent RNA helicase DHX32 OS=Homo sapiens GN=DHX32 PE=1 SV=1	44.1454	25	77	25	3	0	743	84.4	3.0751e-07	0.166138	-0.0990092	0.0113462	1.99335e-07	0.000689581	0.00790742	-0.265147	-0.154792	0.110355	0	0	0	0.163273	0.135485	0.225412	0.156279	0.146175	0.170206	-0.0907469	-0.0210308	-0.0527418	-0.104461	-0.0776258	-0.164202	-0.182257	0.0127602	9.37617e-05	0.0211847
Q9BYG5	PARD6B	Partitioning defective 6 homolog beta OS=Homo sapiens GN=PARD6B PE=1 SV=1	44.086	11	38	9	5	2	372	41.2	3.08098e-07	-0.165028	0.159489	-0.0587871	2.40309e-07	0.0412315	0.00017522	0.324518	0.106241	-0.218276	0	0	0	-0.185967	-0.204511	-0.214889	-0.102737	-0.108103	-0.173964	0.179028	0.132311	0.0286126	0.177804	0.153654	0.231794	0.21322	-0.0527204	-0.047181	-0.0764599
Q5T3J3	LRIF1	Ligand-dependent nuclear receptor-interacting factor 1 OS=Homo sapiens GN=LRIF1 PE=1 SV=1	36.4109	18	50	18	14	0	769	84.5	3.08103e-07	-0.178387	0.151753	-0.0809961	2.55843e-07	0.0688534	0.000117305	0.330139	0.0973907	-0.232749	0	0	0	-0.202616	-0.172779	-0.236687	-0.171142	-0.166987	-0.120109	0.0787101	0.156129	0.100465	0.0967576	0.192853	0.162654	0.274698	-0.043607	-0.0605266	-0.138855
Q9HD33	MRPL47	39S ribosomal protein L47, mitochondrial OS=Homo sapiens GN=MRPL47 PE=1 SV=2	40.8	12	58	12	0	0	250	29.4	3.0847e-07	0.171085	-0.0846398	-0.0213612	2.41921e-07	7.48578e-05	0.122963	-0.255725	-0.192446	0.0632786	0	0	0	0.157955	0.187662	0.122315	0.17215	0.210227	0.176202	-0.110128	-0.134061	-0.139013	-0.0477391	-0.109508	-0.0697262	0.0176971	-0.0269123	0.0040951	-0.0412665
Q9Y5V3-2	MAGED1	Isoform 2 of Melanoma-associated antigen D1 OS=Homo sapiens GN=MAGED1	39.9281	27	229	25	0	0	834	91.9	3.0861e-07	-0.102886	0.0135013	0.1054	1.58302e-05	3.46462e-07	0.00118102	0.116387	0.208286	0.091899	0	0	0	-0.154531	-0.0580643	-0.140598	-0.0873929	-0.0817911	-0.094939	0.0145615	-0.000794155	-0.00683588	0.0400646	-0.00287325	0.0554439	-0.00505748	0.108765	0.102894	0.104542
Q7Z6Z7-2	HUWE1	Isoform 2 of E3 ubiquitin-protein ligase HUWE1 OS=Homo sapiens GN=HUWE1	53.6026	185	1292	185	1	0	4358	479.9	3.11736e-07	0.102857	-0.0695605	0.0285906	2.10782e-07	0.00763399	0.000723762	-0.172417	-0.0742663	0.0981511	0	0	0	0.0848123	0.119208	0.104161	0.132543	0.0731868	0.10323	-0.0410683	-0.0306051	-0.0309487	-0.0898787	-0.0707045	-0.103534	-0.120184	0.032483	0.0123571	0.0409317
Q9HAU0-4	PLEKHA5	Isoform 4 of Pleckstrin homology domain-containing family A member 5 OS=Homo sapiens GN=PLEKHA5	62.7651	59	314	1	0	77	1179	134.5	3.12962e-07	-0.0760296	-0.0818332	0.169494	0.954611	7.38857e-07	4.25544e-07	-0.00580364	0.245524	0.251327	0	0	0	-0.0969719	-0.0638026	-0.0890875	-0.0750242	-0.0626714	-0.0686198	-0.0935486	-0.112719	-0.137508	-0.138753	-0.0247142	-0.0268955	-0.038694	0.166133	0.162671	0.179678
O60568	PLOD3	Procollagen-lysine,2-oxoglutarate 5-dioxygenase 3 OS=Homo sapiens GN=PLOD3 PE=1 SV=1	56.6396	44	306	44	5	0	738	84.7	3.13342e-07	-0.0836755	0.0868375	-0.107576	1.1321e-06	0.572806	2.92457e-06	0.170513	-0.0239003	-0.194413	0	0	0	-0.0903197	-0.0929219	-0.11089	-0.0708263	-0.0799593	-0.0571356	0.0280832	0.048235	0.0693146	0.110137	0.0997714	0.0905916	0.161729	-0.0863109	-0.114512	-0.121905
Q86WA6	BPHL	Valacyclovir hydrolase OS=Homo sapiens GN=BPHL PE=1 SV=1	59.1065	13	83	13	0	0	291	32.5	3.16044e-07	0.0396263	-0.0833674	0.100658	5.8905e-06	0.0199038	7.17052e-07	-0.122994	0.0610318	0.184025	0	0	0	0.00841804	0.0376662	0.025918	0.0635793	0.047075	0.0551011	-0.113144	-0.113645	-0.093547	-0.0236462	-0.0700825	-0.112832	-0.0566734	0.109464	0.110983	0.0815268
P52198	RND2	Rho-related GTP-binding protein RhoN OS=Homo sapiens GN=RND2 PE=1 SV=2	12.7753	2	3	2	2	0	227	25.4	3.16739e-07	-0.362496	0.253248	-0.232693	3.21088e-07	0.233162	4.63206e-05	0.615744	0.129803	-0.485941	1	0	1	-0.239107	-0.46839	-0.528499	-0.363972	-0.23026	-0.34475	0.242194	0.252754	0.111322	0.242854	0.278318	0.21756	0.427731	-0.190667	-0.153711	-0.353702
P40424	PBX1	Pre-B-cell leukemia transcription factor 1 OS=Homo sapiens GN=PBX1 PE=1 SV=1	44.6512	15	72	6	0	7	430	46.6	3.19744e-07	0.119908	-0.151469	0.0474295	2.82053e-07	0.106652	8.69794e-05	-0.271377	-0.0724782	0.198899	0	0	0	0.128656	0.105398	0.046215	0.147868	0.159333	0.131977	-0.12552	-0.116331	-0.125507	-0.270859	-0.130792	-0.118937	-0.172339	0.0623572	0.0582346	0.0216968
Q9NS69	TOMM22	Mitochondrial import receptor subunit TOM22 homolog OS=Homo sapiens GN=TOMM22 PE=1 SV=3	64.0845	7	280	7	7	0	142	15.5	3.20337e-07	-0.0865553	0.110601	-0.131424	1.7038e-06	0.27612	1.91464e-06	0.197156	-0.0448682	-0.242024	0	0	0	-0.091198	-0.1181	-0.124381	-0.0690661	-0.0658894	-0.0506974	0.0424177	0.0960988	0.0776838	0.176253	0.103642	0.0993634	0.178747	-0.151739	-0.118194	-0.124337
Q92797	SYMPK	Symplekin OS=Homo sapiens GN=SYMPK PE=1 SV=2	61.6954	71	466	71	8	0	1274	141.1	3.20614e-07	0.0731317	-0.0458025	0.00209664	2.09164e-07	0.00058523	0.0101188	-0.118934	-0.071035	0.0478991	0	0	0	0.0549514	0.0735934	0.0544786	0.0954289	0.0756153	0.0847224	-0.0708908	-0.0679904	-0.0611146	-0.0421514	-0.0336568	-0.0466029	0.00178944	0.00257686	0.000497821	0.00321523
Q9BVK6	TMED9	Transmembrane emp24 domain-containing protein 9 OS=Homo sapiens GN=TMED9 PE=1 SV=2	44.2553	10	117	8	8	4	235	27.3	3.21347e-07	-0.133989	0.129812	-0.0847602	3.48148e-07	0.31543	3.65265e-05	0.2638	0.0492287	-0.214572	0	0	0	-0.142727	-0.144954	-0.148799	-0.0957715	-0.130217	-0.141465	0.0883066	0.0729605	0.0520626	0.168745	0.15026	0.135269	0.241078	-0.0791214	-0.0926686	-0.0824906
Q9NXR1	NDE1	Nuclear distribution protein nudE homolog 1 OS=Homo sapiens GN=NDE1 PE=1 SV=2	57.2254	23	65	19	0	4	346	38.8	3.22896e-07	0.110931	-0.0560215	-0.0214718	2.74478e-07	4.92731e-05	0.221577	-0.166953	-0.132403	0.0345497	0	0	0	0.0868043	0.0844286	0.146423	0.146231	0.108176	0.0935227	-0.0456527	-0.0578955	-0.0795761	0.00330344	-0.059747	-0.0704071	-0.0821756	-0.00195721	-0.0508542	-0.011604
Q9Y376	CAB39	Calcium-binding protein 39 OS=Homo sapiens GN=CAB39 PE=1 SV=1	63.6364	24	158	19	2	5	341	39.8	3.23168e-07	0.103308	-0.0464402	0.0209598	2.07756e-07	0.00118356	0.00467721	-0.149748	-0.0823484	0.0674	0	0	0	0.104904	0.107318	0.0720509	0.133001	0.115202	0.0873739	-0.0314027	-0.0300132	-0.0484157	-0.0185664	-0.0304348	-0.0580764	-0.108172	0.0119386	0.0153065	0.0356342
G3V4T6	GSTZ1	Maleylacetoacetate isomerase OS=Homo sapiens GN=GSTZ1 PE=1 SV=1	38.7097	8	27	1	0	7	217	24.2	3.25743e-07	-0.166699	0.0856309	-0.0853579	2.56435e-07	0.0457456	0.000172081	0.25233	0.0813409	-0.170989	0	0	0	-0.211684	-0.171931	-0.156946	-0.126497	-0.138562	-0.194573	0.107437	0.0314749	0.0135185	0.146068	0.122626	0.135984	0.0423069	-0.0717569	-0.100241	-0.0840753
Q8WVV4-1	POF1B	Isoform 1 of Protein POF1B OS=Homo sapiens GN=POF1B	16.4706	8	17	8	0	0	595	68.7	3.26556e-07	-0.0894705	-0.37563	0.587125	0.00419152	1.45528e-05	2.09839e-07	-0.28616	0.676595	0.962755	0	1	1	-0.0680414	0.0248162	-0.247627	-0.167538	-0.0671225	-0.0113105	-0.345213	-0.0695128	-0.449405	-0.317927	-0.377933	-0.610165	-0.459256	0.587804	0.607063	0.566508
Q9NW13	RBM28	RNA-binding protein 28 OS=Homo sapiens GN=RBM28 PE=1 SV=3	51.6469	43	231	42	0	1	759	85.7	3.27566e-07	-0.100386	0.0815882	-0.0494403	2.80803e-07	0.0886408	0.000103173	0.181974	0.050946	-0.131028	0	0	0	-0.0829598	-0.0867154	-0.11218	-0.12034	-0.0881813	-0.111941	0.0854575	0.0712406	0.134437	0.0980189	0.0263751	0.0370416	0.118547	-0.0633856	-0.0162357	-0.0686995
P40123	CAP2	Adenylyl cyclase-associated protein 2 OS=Homo sapiens GN=CAP2 PE=1 SV=1	47.1698	17	88	15	0	0	477	52.8	3.28125e-07	0.0614615	-0.10876	0.0845725	1.16178e-06	0.593373	3.13134e-06	-0.170221	0.0231109	0.193332	0	0	0	0.0239514	0.0692065	0.0556098	0.0811074	0.0727955	0.0660989	-0.102665	-0.120172	-0.139927	-0.174116	-0.0584129	-0.0500613	-0.115963	0.0840022	0.0678704	0.101845
Q4KMP7	TBC1D10B	TBC1 domain family member 10B OS=Homo sapiens GN=TBC1D10B PE=1 SV=3	27.7228	19	60	19	7	0	808	87.1	3.32206e-07	0.0890488	-0.0771092	0.0319463	2.51911e-07	0.0327897	0.000229441	-0.166158	-0.0571024	0.109056	0	0	0	0.065147	0.114592	0.0801722	0.0861367	0.106676	0.0815682	-0.102389	-0.0577382	-0.0400365	-0.0261652	-0.10609	-0.123023	-0.0843214	0.0522437	0.0225188	0.0210765
Q9Y2Z4	YARS2	Tyrosine--tRNA ligase, mitochondrial OS=Homo sapiens GN=YARS2 PE=1 SV=2	67.2956	27	160	27	10	0	477	53.2	3.35036e-07	-0.126101	0.10417	-0.0746574	3.2855e-07	0.200231	5.56122e-05	0.230271	0.0514432	-0.178828	0	0	0	-0.135024	-0.117842	-0.166871	-0.107123	-0.115283	-0.11446	0.0515576	0.0279334	0.0842005	0.101179	0.136131	0.156626	0.171563	-0.0497096	-0.0885364	-0.0857264
E5RG17	TATDN1	Putative deoxyribonuclease TATDN1 (Fragment) OS=Homo sapiens GN=TATDN1 PE=1 SV=1	42.8571	13	81	12	0	1	322	36.4	3.35539e-07	0.0983523	-0.0909704	-0.00521933	2.15694e-07	0.00126909	0.00457239	-0.189323	-0.103572	0.0857511	0	0	0	0.081592	0.101714	0.0685004	0.12019	0.125724	0.0923935	-0.0538409	-0.042634	-0.0954306	-0.0582622	-0.104584	-0.130441	-0.1516	-0.0199383	0.00367569	0.000604638
Q14151	SAFB2	Scaffold attachment factor B2 OS=Homo sapiens GN=SAFB2 PE=1 SV=1	50.0525	60	332	41	33	0	953	107.4	3.35639e-07	-0.0971546	0.0627901	-0.00466528	2.17206e-07	0.000797917	0.00759564	0.159945	0.0924893	-0.0674553	0	0	0	-0.104641	-0.101344	-0.109202	-0.104943	-0.0747228	-0.0880744	0.042775	0.0270318	0.0750723	0.0252576	0.0646454	0.0730307	0.131718	-0.00469647	0.00810504	-0.0174044
Q9BSD7	NTPCR	Cancer-related nucleoside-triphosphatase OS=Homo sapiens GN=NTPCR PE=1 SV=1	85.2632	19	102	19	4	0	190	20.7	3.36853e-07	0.100689	-0.0779563	-0.0216431	2.37812e-07	0.000184784	0.0438887	-0.178645	-0.122332	0.0563132	0	0	0	0.0734774	0.0809378	0.119271	0.129864	0.104608	0.0959763	-0.0366695	-0.0551195	-0.0377914	-0.117008	-0.103567	-0.128867	-0.0666717	-0.000802415	-0.0345388	-0.0295882
O75419-3	CDC45	Isoform 3 of Cell division control protein 45 homolog OS=Homo sapiens GN=CDC45	34.1137	19	53	19	0	0	598	68.7	3.37291e-07	0.107005	-0.0840334	0.0464366	2.68183e-07	0.0504825	0.000165668	-0.191039	-0.0605687	0.13047	0	0	0	0.10066	0.0795675	0.0797001	0.128828	0.139985	0.11329	-0.0876625	-0.0321768	-0.0733539	-0.0274904	-0.116936	-0.124966	-0.125648	0.0388877	0.0518589	0.0485631
Q13557-11	CAMK2D	Isoform Delta 11 of Calcium/calmodulin-dependent protein kinase type II subunit delta OS=Homo sapiens GN=CAMK2D	56.4885	24	268	1	0	33	524	59.1	3.38952e-07	-0.136727	0.0900063	-0.110304	4.54486e-07	0.634293	1.9641e-05	0.226733	0.0264233	-0.20031	0	0	0	-0.1786	-0.13029	-0.132059	-0.10823	-0.113037	-0.158145	0.165105	0.0971324	0.0731304	0.10709	0.0785411	0.116684	-0.00763816	-0.106637	-0.132983	-0.0912914
P21802-11	FGFR2	Isoform 11 of Fibroblast growth factor receptor 2 OS=Homo sapiens GN=FGFR2	20.8434	16	41	10	0	2	830	92.7	3.40733e-07	-0.375916	0.208156	-0.159239	2.47599e-07	0.0213109	0.00033563	0.584072	0.216677	-0.367395	1	0	1	-0.353135	-0.433958	-0.413954	-0.300939	-0.314395	-0.439114	0.0817504	0.0704798	0.0804778	0.229408	0.263091	0.339769	0.392115	-0.159551	-0.127016	-0.191149
O00463	TRAF5	TNF receptor-associated factor 5 OS=Homo sapiens GN=TRAF5 PE=1 SV=2	28.7253	12	29	11	1	0	557	64.4	3.40864e-07	0.166788	-0.0828345	0.0348356	2.19157e-07	0.0016998	0.00343604	-0.249622	-0.131952	0.11767	0	0	0	0.143594	0.147678	0.143263	0.181805	0.182387	0.201998	-0.16274	-0.0351731	-0.113299	-0.122692	0.000188834	-0.0843922	-0.0617331	0.0362363	0.0120358	0.0562347
Q5GLZ8	HERC4	Probable E3 ubiquitin-protein ligase HERC4 OS=Homo sapiens GN=HERC4 PE=1 SV=1	48.2498	38	142	38	0	0	1057	118.5	3.43562e-07	0.0869357	-0.0824964	0.0820171	6.25015e-07	0.972696	9.6375e-06	-0.169432	-0.0049186	0.164513	0	0	0	0.0509027	0.115688	0.0676967	0.0817511	0.0922208	0.113355	-0.123638	-0.0444848	-0.12449	-0.0694236	-0.0405866	-0.0744642	-0.100387	0.116052	0.0527445	0.0772542
Q5QP82	DCAF10	DDB1- and CUL4-associated factor 10 OS=Homo sapiens GN=DCAF10 PE=1 SV=1	28.8014	13	28	2	0	11	559	60.5	3.45183e-07	0.137947	-0.0937778	0.0324814	2.2876e-07	0.00545784	0.00111641	-0.231724	-0.105465	0.126259	0	0	0	0.119859	0.114353	0.16877	0.114856	0.139697	0.170143	-0.133801	-0.11084	-0.106506	-0.0604362	-0.0656873	-0.165815	-0.0133601	0.0532771	0.0211815	0.0229855
Q9NXH9	TRMT1	tRNA (guanine(26)-N(2))-dimethyltransferase OS=Homo sapiens GN=TRMT1 PE=1 SV=1	53.7178	30	114	30	0	0	659	72.2	3.46681e-07	-0.0572246	0.102017	-0.150074	9.65558e-06	0.00968956	6.326e-07	0.159241	-0.0928499	-0.252091	0	0	0	-0.0810132	-0.055799	-0.0780137	-0.0572671	-0.0568746	-0.01438	0.163181	0.153919	0.0936244	0.137676	0.0527602	0.053483	0.0594731	-0.128381	-0.153431	-0.168411
Q5VT06	CEP350	Centrosome-associated protein 350 OS=Homo sapiens GN=CEP350 PE=1 SV=1	30.7988	77	160	76	32	1	3117	350.7	3.46704e-07	0.0671275	-0.0610735	0.0193563	2.51351e-07	0.0209253	0.000347861	-0.128201	-0.0477713	0.0804297	0	0	0	0.0872784	0.0611506	0.0595304	0.0710305	0.0507502	0.073025	-0.0661352	-0.0718981	-0.0297158	-0.0193305	-0.0724038	-0.0964416	-0.0715892	0.0444112	0.00703738	0.0066202
H0Y5K5	ERGIC3	Endoplasmic reticulum-Golgi intermediate compartment protein 3 (Fragment) OS=Homo sapiens GN=ERGIC3 PE=1 SV=1	42.0655	15	35	15	0	0	397	44.6	3.48117e-07	-0.0916552	0.0920651	-0.0261615	2.58574e-07	0.0272388	0.000281548	0.18372	0.0654937	-0.118227	0	0	0	-0.0963485	-0.118969	-0.0671631	-0.082802	-0.0624488	-0.1222	0.0707582	0.058904	0.0597162	0.159396	0.095731	0.0780826	0.121868	-0.0538084	-0.0151282	-0.00954784
Q2T9J0	TYSND1	Peroxisomal leader peptide-processing protease OS=Homo sapiens GN=TYSND1 PE=1 SV=3	33.9223	12	43	12	2	0	566	59.3	3.49382e-07	-0.0336293	0.106287	-0.13002	1.58843e-05	0.00418973	5.13201e-07	0.139916	-0.0963904	-0.236307	0	0	0	-0.0447835	-0.0482239	-0.0573339	0.00184881	-0.0258253	-0.0274579	0.0897908	0.0930626	0.0797405	0.194118	0.0936772	0.0734593	0.120162	-0.114462	-0.172134	-0.103463
Q8NFV4	ABHD11	Alpha/beta hydrolase domain-containing protein 11 OS=Homo sapiens GN=ABHD11 PE=2 SV=1	55.5556	13	70	13	0	0	315	34.7	3.52121e-07	-0.118133	0.0930509	-0.123612	7.90238e-07	0.97899	6.61939e-06	0.211184	-0.00547844	-0.216663	0	0	0	-0.130828	-0.17842	-0.0997644	-0.120921	-0.0949045	-0.0839619	0.0587289	0.0916233	0.0408714	0.155398	0.118648	0.0451598	0.140927	-0.110009	-0.107285	-0.153541
Q9NVU7	SDAD1	Protein SDA1 homolog OS=Homo sapiens GN=SDAD1 PE=1 SV=3	37.7001	27	130	27	0	0	687	79.8	3.53501e-07	-0.146359	0.0682066	-0.0195627	2.30009e-07	0.000689658	0.00963361	0.214566	0.126797	-0.0877693	0	0	0	-0.161818	-0.140998	-0.196159	-0.139932	-0.108467	-0.130782	0.137316	0.107985	0.0379052	0.0296955	0.0131703	0.0604051	0.0909689	-0.0226687	-0.0141244	-0.0218951
Q8N884	MB21D1	Cyclic GMP-AMP synthase OS=Homo sapiens GN=MB21D1 PE=1 SV=2	41.1877	18	62	18	2	0	522	58.8	3.56591e-07	0.132125	0.243333	-1.20758	0.604518	1.25074e-06	3.77391e-07	0.111209	-1.3397	-1.45091	0	1	1	0.111069	0.13363	0.0912143	0.135582	0.17704	0.144214	0.00744166	-0.0189376	0.032919	0.00984519	0.491878	0.563665	0.616522	-1.25398	-1.10801	-1.26075
Q8TAC2	JOSD2	Josephin-2 OS=Homo sapiens GN=JOSD2 PE=1 SV=1	22.3404	2	7	2	0	0	188	20.7	3.59503e-07	0.185747	-0.154684	0.106836	3.45034e-07	0.182064	6.4704e-05	-0.340432	-0.0789116	0.26152	0	0	0	0.111489	0.194173	0.227043	0.211424	0.164948	0.205409	-0.0853418	-0.164346	-0.205139	-0.0336724	-0.185602	-0.183745	-0.224944	0.148331	0.034303	0.137874
Q9UK22	FBXO2	F-box only protein 2 OS=Homo sapiens GN=FBXO2 PE=1 SV=2	33.4459	7	44	7	5	0	296	33.3	3.64121e-07	-0.247171	-0.0377747	0.266401	0.000276636	2.49438e-07	6.00346e-05	0.209396	0.513572	0.304176	0	1	0	-0.293144	-0.239859	-0.282383	-0.196503	-0.250493	-0.220645	0.0270685	0.0823421	-0.0740195	0.0452148	-0.0451821	-0.120443	-0.179404	0.267043	0.276754	0.255406
P49589-3	CARS	Isoform 3 of Cysteine--tRNA ligase, cytoplasmic OS=Homo sapiens GN=CARS	69.3141	56	451	56	0	0	831	94.6	3.6433e-07	0.0840437	-0.00141263	-0.0775731	2.90655e-05	3.57794e-07	0.000689454	-0.0854563	-0.161617	-0.0761605	0	0	0	0.0747326	0.0846223	0.0544651	0.0999874	0.0928659	0.0975886	0.0176483	0.0312372	-0.000964396	0.0300252	-0.0305067	-0.0271567	-0.0301713	-0.0775881	-0.0865763	-0.068555
Q9H4M3	FBXO44	F-box only protein 44 OS=Homo sapiens GN=FBXO44 PE=1 SV=3	24.7059	6	11	2	2	3	255	29.7	3.655e-07	0.0295902	-0.115315	0.179185	7.42223e-05	0.000527912	3.41162e-07	-0.144905	0.149595	0.2945	0	0	0	-0.0297473	0.0603811	0.0451038	0.00494208	-0.00391363	0.100775	-0.0898978	-0.128257	-0.182223	-0.0935688	-0.0989402	-0.070596	-0.143718	0.205164	0.146783	0.185609
Q5J8M3	EMC4	ER membrane protein complex subunit 4 OS=Homo sapiens GN=EMC4 PE=1 SV=2	42.623	8	61	8	1	0	183	20.1	3.66005e-07	-0.213191	0.100643	-0.161501	4.22269e-07	0.411189	3.29606e-05	0.313833	0.0516897	-0.262143	0	0	0	-0.197297	-0.212686	-0.253976	-0.187695	-0.19311	-0.234379	0.0313054	0.0746498	0.0506217	0.0121602	0.171993	0.175632	0.188135	-0.183004	-0.120947	-0.180552
Q99865	SPIN2A	Spindlin-2A OS=Homo sapiens GN=SPIN2A PE=1 SV=3	40.6977	8	31	6	0	0	258	29.2	3.66156e-07	-0.139546	0.0829049	-0.103076	4.2339e-07	0.414477	3.27316e-05	0.222451	0.0364706	-0.185981	0	0	0	-0.111363	-0.14794	-0.16842	-0.126661	-0.110269	-0.172626	0.144402	0.0800509	0.0669259	-0.00937445	0.0985717	0.0727477	0.127011	-0.0773178	-0.131394	-0.100516
Q9Y3L5	RAP2C	Ras-related protein Rap-2c OS=Homo sapiens GN=RAP2C PE=1 SV=1	68.306	11	67	5	0	7	183	20.7	3.67811e-07	-0.118632	0.0738591	-0.0635583	3.11181e-07	0.0841058	0.000122215	0.192492	0.0550742	-0.137417	0	0	0	-0.115111	-0.111254	-0.160567	-0.105632	-0.104603	-0.114628	0.0420492	0.0485121	0.00714043	0.0797687	0.0908226	0.119093	0.129628	-0.0529185	-0.0557697	-0.0819867
Q05209	PTPN12	Tyrosine-protein phosphatase non-receptor type 12 OS=Homo sapiens GN=PTPN12 PE=1 SV=3	45.5128	27	103	27	0	0	780	88.1	3.69257e-07	0.066007	-0.109573	0.088053	1.24751e-06	0.641678	3.7103e-06	-0.17558	0.0220459	0.197626	0	0	0	0.0613011	0.083575	0.0833772	0.0775018	0.0447709	0.0455162	-0.108875	-0.085572	-0.141609	-0.0343849	-0.113494	-0.160018	-0.123059	0.135369	0.073136	0.0556535
Q9NR31	SAR1A	GTP-binding protein SAR1a OS=Homo sapiens GN=SAR1A PE=1 SV=1	75.2525	12	181	8	0	0	198	22.4	3.70536e-07	-0.125289	0.110661	-0.0878963	4.3548e-07	0.439172	3.13764e-05	0.23595	0.0373927	-0.198557	0	0	0	-0.153668	-0.116132	-0.134673	-0.111614	-0.104104	-0.131544	0.12527	0.141872	0.0312217	0.192002	0.0949638	0.145278	0.0440202	-0.115149	-0.0726825	-0.0758576
Q9Y4B6	VPRBP	Protein VPRBP OS=Homo sapiens GN=VPRBP PE=1 SV=3	50.0332	57	208	57	0	0	1507	168.9	3.73621e-07	0.0712883	-0.0435479	-0.0160444	2.97465e-07	8.03712e-05	0.146172	-0.114836	-0.0873328	0.0275035	0	0	0	0.0504759	0.0690001	0.0528992	0.0792897	0.0716775	0.104388	-0.0232063	-0.010271	-0.0329846	-0.0532287	-0.0546227	-0.0734138	-0.0571083	-0.0120423	-0.027182	-0.00890902
Q8NBL1	POGLUT1	Protein O-glucosyltransferase 1 OS=Homo sapiens GN=POGLUT1 PE=1 SV=1	42.602	17	57	17	8	0	392	46.2	3.74028e-07	-0.205489	0.116904	-0.0177361	2.42545e-07	0.000813966	0.00864921	0.322393	0.187753	-0.13464	0	0	0	-0.253163	-0.224772	-0.258245	-0.189192	-0.154059	-0.153504	0.120941	0.123316	0.029805	0.249623	0.0807857	0.0908673	0.122989	-0.0224467	-0.00821384	-0.0225477
P41134	ID1	DNA-binding protein inhibitor ID-1 OS=Homo sapiens GN=ID1 PE=1 SV=3	61.9355	7	19	7	2	0	155	16.1	3.7526e-07	-0.231268	0.157038	-0.018645	2.41372e-07	0.00136342	0.00494096	0.388306	0.212623	-0.175683	0	0	0	-0.309114	-0.295873	-0.277776	-0.197721	-0.135697	-0.17143	0.172519	0.246928	0.126017	0.10236	0.106703	0.0926151	0.252124	-0.00961824	-0.049462	0.00314534
Q9BYT3	STK33	Serine/threonine-protein kinase 33 OS=Homo sapiens GN=STK33 PE=1 SV=1	26.4591	14	28	14	0	0	514	57.8	3.75427e-07	0.167914	-0.154774	0.089405	3.5018e-07	0.157369	7.61696e-05	-0.322688	-0.078509	0.244179	0	0	0	0.179406	0.144326	0.200313	0.186756	0.160001	0.136682	-0.103139	-0.0454847	-0.1054	-0.250221	-0.134833	-0.200833	-0.243511	0.118419	0.0811588	0.0686374
Q8N335	GPD1L	Glycerol-3-phosphate dehydrogenase 1-like protein OS=Homo sapiens GN=GPD1L PE=1 SV=1	73.7892	23	141	23	5	0	351	38.4	3.79288e-07	0.261425	-0.22279	0.0616064	2.61445e-07	0.0114505	0.000646838	-0.484216	-0.199819	0.284397	1	0	0	0.249788	0.247739	0.266925	0.290559	0.256208	0.257333	-0.179885	-0.124483	-0.13375	-0.0983978	-0.272449	-0.403716	-0.346851	0.0839878	0.0368167	0.0640147
Q8TAM6-2	ERMN	Isoform 2 of Ermin OS=Homo sapiens GN=ERMN	46.1279	13	43	13	0	0	297	34.3	3.80889e-07	-0.326738	0.0512193	0.233765	4.59092e-06	8.09522e-07	0.0176762	0.377957	0.560503	0.182546	0	1	0	-0.439457	-0.276854	-0.352669	-0.350998	-0.29094	-0.249509	0.142551	0.185273	0.0836766	0.0551594	0.00254167	0.0201575	-0.130825	0.207795	0.248201	0.2453
Q9NPF5	DMAP1	DNA methyltransferase 1-associated protein 1 OS=Homo sapiens GN=DMAP1 PE=1 SV=1	56.9593	24	82	24	8	0	467	53	3.84208e-07	-0.128404	0.0748059	-0.0047378	2.52481e-07	0.000571441	0.0134558	0.203209	0.123666	-0.0795437	0	0	0	-0.172395	-0.11248	-0.150785	-0.130281	-0.114365	-0.0901151	0.05264	0.0422429	0.0279729	0.152039	0.0892019	0.0618231	0.0977214	0.0115525	-0.0158497	-0.00991617
Q6ZQX7-4	LIAT1	Isoform 4 of Protein LIAT1 OS=Homo sapiens GN=LIAT1	46.8085	10	28	10	0	0	423	46.4	3.84879e-07	0.158026	-0.110218	0.114334	4.46343e-07	0.422017	3.38538e-05	-0.268244	-0.0436917	0.224552	0	0	0	0.12199	0.134118	0.20663	0.149418	0.180872	0.155126	-0.161582	-0.10578	-0.0431202	-0.0352609	-0.137164	-0.208855	-0.0797658	0.116682	0.0965746	0.129745
Q15345	LRRC41	Leucine-rich repeat-containing protein 41 OS=Homo sapiens GN=LRRC41 PE=1 SV=3	42.9803	26	125	26	0	0	812	88.6	3.87867e-07	-0.173242	0.053559	0.0550708	6.07347e-07	8.26829e-06	0.998458	0.226801	0.228313	0.0015118	0	0	0	-0.194915	-0.178372	-0.203626	-0.170637	-0.163118	-0.128784	0.0931833	0.139776	0.0398184	-0.036561	0.0457294	0.0253879	0.0675793	0.0388938	0.0598366	0.0664821
P09668	CTSH	Pro-cathepsin H OS=Homo sapiens GN=CTSH PE=1 SV=4	9.25373	4	12	4	0	0	335	37.4	3.88883e-07	-0.140922	-0.0695067	0.1698	0.0226323	2.82577e-07	4.187e-06	0.0714158	0.310722	0.239307	0	1	0	-0.174846	-0.154985	-0.111382	-0.143805	-0.176578	-0.0839391	-0.0322012	-0.122467	-0.0477467	-0.00178046	-0.0983586	-0.0782275	-0.105765	0.21766	0.168604	0.123136
Q9P0S3	ORMDL1	ORM1-like protein 1 OS=Homo sapiens GN=ORMDL1 PE=2 SV=1	24.8366	3	15	2	1	0	153	17.4	3.90244e-07	-0.1879	0.162469	-0.0257716	2.57394e-07	0.00520976	0.00136434	0.350369	0.162128	-0.188241	0	0	0	-0.185706	-0.280583	-0.213808	-0.158757	-0.127162	-0.161383	0.183473	0.252819	0.140296	0.0966855	0.217626	0.0667189	0.179668	0.0331204	-0.044234	-0.0662011
Q13601	KRR1	KRR1 small subunit processome component homolog OS=Homo sapiens GN=KRR1 PE=1 SV=4	47.769	17	112	17	1	0	381	43.6	3.90839e-07	-0.103587	0.0434052	-0.0631421	3.38595e-07	0.101067	0.000113063	0.146992	0.0404451	-0.106547	0	0	0	-0.100316	-0.108775	-0.140258	-0.109212	-0.0587574	-0.104206	0.0674977	0.0460592	0.0178541	0.0612732	0.0179932	0.0327078	0.0604509	-0.0690709	-0.025708	-0.0946475
Q9UK61	FAM208A	Protein FAM208A OS=Homo sapiens GN=FAM208A PE=1 SV=3	49.1018	73	230	73	0	0	1670	188.9	3.92141e-07	0.0906254	-0.0790009	0.0291641	2.88751e-07	0.0262301	0.000334063	-0.169626	-0.0614613	0.108165	0	0	0	0.0634274	0.0994559	0.0847633	0.110359	0.0928684	0.0928784	-0.122025	-0.109333	-0.0901113	-0.0975592	-0.0523652	-0.0757798	-0.00583238	0.0450037	0.0175762	0.0249125
O14787-2	TNPO2	Isoform 2 of Transportin-2 OS=Homo sapiens GN=TNPO2	54.115	33	269	24	0	0	887	100.3	3.94395e-07	0.0693471	-0.106298	0.0785757	9.8208e-07	0.919951	6.15852e-06	-0.175645	0.00922852	0.184874	0	0	0	0.0548512	0.075939	0.0309882	0.0689495	0.0871154	0.0982396	-0.0883349	-0.0589301	-0.0989466	-0.18108	-0.0782239	-0.0941172	-0.144454	0.0532192	0.0978698	0.084638
Q96GA7	SDSL	Serine dehydratase-like OS=Homo sapiens GN=SDSL PE=1 SV=1	36.1702	8	43	8	1	0	329	34.7	3.94596e-07	-0.245745	0.0952395	0.0721305	4.83439e-07	1.52426e-05	0.848918	0.340984	0.317875	-0.023109	0	1	0	-0.253855	-0.279144	-0.278392	-0.266834	-0.247986	-0.148257	0.095423	0.119271	-0.0529846	0.103034	0.160406	0.140716	0.10081	0.0834578	0.125942	0.00699196
Q9Y6I3	EPN1	Epsin-1 OS=Homo sapiens GN=EPN1 PE=1 SV=2	48.2639	18	120	2	2	23	576	60.3	3.97832e-07	-0.086859	0.0444915	-0.0546558	3.69371e-07	0.155816	8.16973e-05	0.13135	0.0322032	-0.0991473	0	0	0	-0.100526	-0.082207	-0.112045	-0.0703808	-0.0902153	-0.0657794	0.0952506	0.0283185	0.037344	0.0173435	0.0393203	0.0638294	0.0300341	-0.0551845	-0.0773434	-0.0314395
Q9NQB0-5	TCF7L2	Isoform 5 of Transcription factor 7-like 2 OS=Homo sapiens GN=TCF7L2	17.4419	10	22	1	0	11	602	66	4.03426e-07	-0.149192	0.0685587	-0.00652439	2.75494e-07	0.000314043	0.0294506	0.217751	0.142668	-0.0750831	0	0	0	-0.147705	-0.105228	-0.192485	-0.131638	-0.144885	-0.173212	0.0488462	0.0611516	0.0165101	0.0731557	0.0751467	0.0690433	0.136057	-0.0565662	0.0475296	-0.0105365
O00566	MPHOSPH10	U3 small nucleolar ribonucleoprotein protein MPP10 OS=Homo sapiens GN=MPHOSPH10 PE=1 SV=2	37.7386	23	142	23	13	0	681	78.8	4.04244e-07	-0.102324	0.0780885	-0.0477746	3.30784e-07	0.0680553	0.000160486	0.180413	0.0545497	-0.125863	0	0	0	-0.143077	-0.0776042	-0.125105	-0.111043	-0.0853516	-0.0717652	0.0761197	0.0684078	0.0703569	0.155066	0.0403959	0.086883	0.049391	-0.0369881	-0.0492344	-0.0571012
Q9NRZ7-3	AGPAT3	Isoform 3 of 1-acyl-sn-glycerol-3-phosphate acyltransferase gamma OS=Homo sapiens GN=AGPAT3	18.9394	8	23	8	0	0	396	45.5	4.1177e-07	-0.218179	0.0967011	-0.0542619	2.65258e-07	0.00218789	0.00341999	0.31488	0.163917	-0.150963	0	0	0	-0.247948	-0.213114	-0.225217	-0.19412	-0.210559	-0.218116	0.0704203	0.0108177	-0.00364787	0.20874	0.143139	0.147905	0.0995333	-0.0490409	-0.0487113	-0.0650336
P54098	POLG	DNA polymerase subunit gamma-1 OS=Homo sapiens GN=POLG PE=1 SV=1	43.9064	41	118	41	23	0	1239	139.5	4.11792e-07	-0.078959	0.0568459	-0.178124	2.22393e-05	0.00344657	5.61713e-07	0.135805	-0.0991648	-0.23497	0	0	0	-0.0552135	-0.118169	-0.0927047	-0.0398551	-0.068216	-0.099596	0.0268789	0.0910566	0.0254832	0.0706543	0.0868594	-0.00719397	0.104183	-0.172854	-0.165745	-0.195772
O00483	NDUFA4	Cytochrome c oxidase subunit NDUFA4 OS=Homo sapiens GN=NDUFA4 PE=1 SV=1	55.5556	5	57	5	5	0	81	9.4	4.16711e-07	0.142074	-0.14038	0.0737546	3.89987e-07	0.165078	8.19522e-05	-0.282454	-0.0683191	0.214135	0	0	0	0.0979706	0.124013	0.18351	0.163605	0.168748	0.114595	-0.157167	-0.188722	-0.0723165	-0.0480933	-0.177424	-0.21377	-0.12517	0.0600472	0.0414922	0.119724
P35240	NF2	Merlin OS=Homo sapiens GN=NF2 PE=1 SV=1	46.8908	29	74	28	1	1	595	69.6	4.18787e-07	0.0152842	-0.117181	0.112934	2.33011e-05	0.00331792	5.64561e-07	-0.132465	0.0976496	0.230114	0	0	0	-0.00394926	0.0257639	-0.0194175	0.0226917	0.0381701	0.0284459	-0.0820301	-0.0521863	-0.0862216	-0.181059	-0.142777	-0.138559	-0.137431	0.103283	0.125743	0.109775
Q9Y4E5	ZNF451	Zinc finger protein 451 OS=Homo sapiens GN=ZNF451 PE=1 SV=2	43.9208	39	117	38	0	1	1061	121.4	4.19696e-07	0.0729665	-0.0320783	-0.0556129	1.55019e-06	2.3678e-06	0.265203	-0.105045	-0.128579	-0.0235346	0	0	0	0.0630569	0.0512397	0.0738843	0.0930562	0.0689297	0.0876321	-0.0141746	-0.0265124	-0.0231176	-0.0849266	0.000257529	-0.033459	-0.0426154	-0.0544557	-0.060721	-0.0516618
Q9Y4F3	KIAA0430	Meiosis arrest female protein 1 OS=Homo sapiens GN=KIAA0430 PE=1 SV=6	15.2124	22	45	22	0	0	1742	192.7	4.20076e-07	0.107533	-0.0919736	-0.0298489	2.9826e-07	0.000210493	0.0511349	-0.199507	-0.137382	0.0621248	0	0	0	0.146792	0.0756083	0.0853561	0.107618	0.100427	0.129398	-0.0930306	-0.0348062	-0.0404031	-0.104357	-0.105028	-0.160624	-0.105567	-0.012456	-0.0325804	-0.0445103
O43505	B4GAT1	Beta-1,4-glucuronyltransferase 1 OS=Homo sapiens GN=B4GAT1 PE=1 SV=1	49.6386	15	59	15	15	0	415	47.1	4.21807e-07	-0.114206	0.145331	-0.159552	1.75666e-06	0.455535	3.22897e-06	0.259537	-0.0453462	-0.304883	0	0	0	-0.144045	-0.0954699	-0.120521	-0.0755958	-0.146345	-0.103256	0.0941639	0.124568	0.093984	0.255844	0.163025	0.101628	0.184104	-0.0964649	-0.233713	-0.148477
Q8N766	EMC1	ER membrane protein complex subunit 1 OS=Homo sapiens GN=EMC1 PE=1 SV=1	52.568	40	290	40	0	0	993	111.7	4.21987e-07	-0.126883	0.119059	-0.104688	6.16327e-07	0.768678	1.90328e-05	0.245942	0.0221951	-0.223747	0	0	0	-0.139953	-0.14426	-0.149544	-0.10565	-0.0940316	-0.127858	0.0590597	0.0758736	0.0448089	0.132071	0.134466	0.170352	0.216785	-0.107996	-0.0937549	-0.112312
A0A0B4J2C3	TPT1	Translationally-controlled tumor protein OS=Homo sapiens GN=TPT1 PE=1 SV=1	42.132	10	255	10	0	0	197	22.6	4.2353e-07	-0.121061	0.0933033	-0.0574078	3.50386e-07	0.0751584	0.000156239	0.214365	0.0636535	-0.150711	0	0	0	-0.13406	-0.0997064	-0.117407	-0.136156	-0.110628	-0.12841	0.115434	0.0552049	0.0372869	0.104804	0.0976293	0.189772	0.0529914	-0.0799896	-0.054791	-0.0374428
O75582	RPS6KA5	Ribosomal protein S6 kinase alpha-5 OS=Homo sapiens GN=RPS6KA5 PE=1 SV=1	9.22693	6	9	5	0	0	802	89.8	4.25795e-07	0.218681	-0.170366	0.0546652	2.9088e-07	0.0105778	0.000799709	-0.389047	-0.164016	0.225031	0	0	0	0.268037	0.153806	0.201339	0.248397	0.240466	0.200044	-0.209767	-0.236871	-0.147781	-0.0190059	-0.142586	-0.230351	-0.206198	0.130035	-0.0356709	0.0696318
Q8N4H5	TOMM5	Mitochondrial import receptor subunit TOM5 homolog OS=Homo sapiens GN=TOMM5 PE=1 SV=1	60.7843	5	37	5	1	0	51	6	4.3215e-07	-0.0655141	0.0576007	-0.0910821	2.08038e-06	0.34839	2.80495e-06	0.123115	-0.025568	-0.148683	0	0	0	-0.0797392	-0.0434537	-0.090754	-0.0318574	-0.0484428	-0.0988376	0.0660102	0.0558537	0.0757045	0.0918197	0.0400568	0.0267295	0.0470307	-0.113805	-0.0966194	-0.062822
Q9BYB4	GNB1L	Guanine nucleotide-binding protein subunit beta-like protein 1 OS=Homo sapiens GN=GNB1L PE=1 SV=2	40.6728	14	51	14	6	0	327	35.6	4.32706e-07	0.135518	-0.118107	0.0588409	3.54127e-07	0.0698494	0.00016963	-0.253625	-0.076677	0.176948	0	0	0	0.120952	0.1515	0.103589	0.1407	0.131151	0.165215	-0.118906	-0.0834957	-0.0237798	-0.220846	-0.116184	-0.162825	-0.100709	0.0557629	0.0618959	0.058864
Q9UPN3	MACF1	Microtubule-actin cross-linking factor 1, isoforms 1/2/3/5 OS=Homo sapiens GN=MACF1 PE=1 SV=4	30.6172	181	444	4	0	193	7388	837.8	4.34943e-07	-0.452785	0.296732	-0.391762	6.54473e-07	0.808338	1.81616e-05	0.749517	0.0610224	-0.688494	1	0	1	-0.432109	-0.51898	-0.516997	-0.398156	-0.399124	-0.451343	0.148196	0.163421	0.094126	0.160788	0.473606	0.517006	0.51998	-0.408023	-0.349349	-0.417915
P52630	STAT2	Signal transducer and activator of transcription 2 OS=Homo sapiens GN=STAT2 PE=1 SV=1	42.7732	32	88	31	0	1	851	97.9	4.35009e-07	0.0346051	-0.0675928	0.10837	2.24907e-05	0.00378917	6.01647e-07	-0.102198	0.0737652	0.175963	0	0	0	0.0070151	0.0420667	0.0239426	0.0304122	0.0442451	0.0599489	-0.0580121	-0.0592953	-0.0833032	-0.0020341	-0.0794357	-0.0900126	-0.101056	0.118179	0.0891628	0.117769
P39748	FEN1	Flap endonuclease 1 OS=Homo sapiens GN=FEN1 PE=1 SV=1	65	22	342	22	0	0	380	42.6	4.36964e-07	0.110232	-0.0595106	0.0981702	6.81459e-07	0.850765	1.6743e-05	-0.169742	-0.0120615	0.157681	0	0	0	0.0771531	0.148458	0.110925	0.111594	0.0828534	0.130407	-0.0646919	-0.0616503	0.0151959	-0.0531027	-0.0801565	-0.0744835	-0.0976855	0.108657	0.0695407	0.116313
O75534-4	CSDE1	Isoform 4 of Cold shock domain-containing protein E1 OS=Homo sapiens GN=CSDE1	67.2986	55	720	3	0	80	844	93.7	4.38048e-07	-0.0528752	0.059203	-0.0467099	7.22894e-07	0.90812	1.47442e-05	0.112078	0.00616527	-0.105913	0	0	0	-0.0876688	-0.0452778	-0.0739302	-0.0518278	-0.0321812	-0.0263654	0.0773285	0.0641048	0.0278658	0.0474188	0.0549927	0.0882183	0.0544921	-0.04763	-0.0605486	-0.0319511
Q6UWP2	DHRS11	Dehydrogenase/reductase SDR family member 11 OS=Homo sapiens GN=DHRS11 PE=1 SV=1	45.7692	9	31	9	1	0	260	28.3	4.38309e-07	0.185973	-0.245961	0.184292	8.73254e-07	0.99953	1.0012e-05	-0.431934	-0.00168074	0.430254	1	0	1	0.156624	0.180954	0.180251	0.222613	0.179165	0.196231	-0.127202	-0.140718	-0.195931	-0.179213	-0.311754	-0.319679	-0.447233	0.16242	0.211895	0.178562
Q99549	MPHOSPH8	M-phase phosphoprotein 8 OS=Homo sapiens GN=MPHOSPH8 PE=1 SV=2	43.1395	31	141	31	2	0	860	97.1	4.40589e-07	0.0711367	-0.0528644	0.00318837	2.83635e-07	0.00151756	0.00548861	-0.124001	-0.0679483	0.0560528	0	0	0	0.0496941	0.0627846	0.0640677	0.0852084	0.0829809	0.0820844	-0.0663435	-0.0510289	-0.0610431	-0.0891859	-0.0279812	-0.0642592	-0.0102091	0.0193729	0.00677394	-0.0165817
A4D1E9	GTPBP10	GTP-binding protein 10 OS=Homo sapiens GN=GTPBP10 PE=1 SV=1	35.9173	13	44	13	0	0	387	42.9	4.41088e-07	0.131608	-0.0993544	0.0418859	3.13171e-07	0.0183022	0.000519075	-0.230962	-0.0897216	0.14124	0	0	0	0.120493	0.140661	0.0860157	0.0976745	0.150506	0.194295	-0.154797	-0.126241	-0.13101	-0.0805255	-0.109669	-0.0679767	-0.0252613	0.0687277	0.0347888	0.0221412
Q9Y6C9	MTCH2	Mitochondrial carrier homolog 2 OS=Homo sapiens GN=MTCH2 PE=1 SV=1	47.1947	17	143	6	6	13	303	33.3	4.47103e-07	-0.109731	0.0758918	0.00523147	2.96133e-07	0.000551999	0.017356	0.185622	0.114962	-0.0706604	0	0	0	-0.131587	-0.108992	-0.111864	-0.0771614	-0.0953375	-0.133443	0.039447	0.0603557	0.0504311	0.152986	0.0822299	0.0467398	0.0990537	-0.0067121	0.0343921	-0.0119856
Q92754	TFAP2C	Transcription factor AP-2 gamma OS=Homo sapiens GN=TFAP2C PE=1 SV=1	29.3333	13	61	7	0	7	450	49.1	4.48861e-07	0.110509	-0.13594	0.0535429	4.31343e-07	0.194207	7.76935e-05	-0.246449	-0.0569658	0.189483	0	0	0	0.112673	0.0724586	0.108251	0.143337	0.108869	0.117463	-0.120862	-0.158418	-0.120893	-0.0178125	-0.181237	-0.187387	-0.164975	0.0751855	0.0657289	0.0197142
Q8IU81	IRF2BP1	Interferon regulatory factor 2-binding protein 1 OS=Homo sapiens GN=IRF2BP1 PE=1 SV=1	77.3973	34	188	34	34	0	584	61.6	4.49817e-07	0.081363	-0.0964546	0.0755961	8.05237e-07	0.967493	1.2673e-05	-0.177818	-0.0057669	0.172051	0	0	0	0.066593	0.0713266	0.0386826	0.0880229	0.104744	0.118809	-0.053208	-0.0717272	-0.0811182	-0.054308	-0.138603	-0.145102	-0.131115	0.0813543	0.0862382	0.0591957
E7EPT4	NDUFV2	NADH dehydrogenase [ubiquinone] flavoprotein 2, mitochondrial OS=Homo sapiens GN=NDUFV2 PE=1 SV=1	63.4921	16	98	16	0	0	252	27.9	4.50205e-07	0.0987231	-0.0631432	0.00155116	2.94665e-07	0.000722906	0.0128257	-0.161866	-0.0971719	0.0646944	0	0	0	0.0967809	0.0351929	0.122412	0.110669	0.109893	0.117391	-0.090291	-0.0848717	-0.0268861	-0.0675613	-0.0622361	-0.0727671	-0.037389	-0.00888558	0.0326656	-0.0191266
P17655	CAPN2	Calpain-2 catalytic subunit OS=Homo sapiens GN=CAPN2 PE=1 SV=6	65.7143	43	343	43	4	0	700	79.9	4.50512e-07	0.0761152	-0.0347441	0.0058161	3.01836e-07	0.00045374	0.0221094	-0.110859	-0.0702991	0.0405602	0	0	0	0.0431029	0.0941325	0.0751464	0.0900192	0.0728128	0.0814776	-0.0165969	-0.0447218	-0.0456502	-0.0218989	-0.0235895	-0.0169169	-0.0738344	0.0106518	-0.00989777	0.0166943
Q9P035	PTPLAD1	Very-long-chain (3R)-3-hydroxyacyl-CoA dehydratase 3 OS=Homo sapiens GN=PTPLAD1 PE=1 SV=2	34.2541	12	98	12	0	0	362	43.1	4.51304e-07	-0.18407	0.15938	-0.138929	5.75753e-07	0.576093	2.90304e-05	0.34345	0.0451406	-0.298309	0	0	0	-0.10632	-0.207398	-0.225421	-0.18152	-0.16064	-0.223119	0.18134	0.096345	0.151078	0.333326	0.110197	0.123015	0.12036	-0.132868	-0.133239	-0.15068
Q07021	C1QBP	Complement component 1 Q subcomponent-binding protein, mitochondrial OS=Homo sapiens GN=C1QBP PE=1 SV=1	63.1206	12	988	12	3	0	282	31.3	4.51914e-07	-0.111934	0.0966185	-0.124682	1.16186e-06	0.896349	6.61904e-06	0.208552	-0.0127484	-0.2213	0	0	0	-0.122349	-0.0966772	-0.127742	-0.0715237	-0.119301	-0.134007	0.057575	0.0689339	0.0718349	0.206318	0.0648177	0.0710305	0.13582	-0.135814	-0.117125	-0.121107
Q66K14	TBC1D9B	TBC1 domain family member 9B OS=Homo sapiens GN=TBC1D9B PE=1 SV=3	41.76	41	164	37	0	4	1250	140.4	4.53655e-07	0.106749	-0.0681559	0.0527576	3.66676e-07	0.0645821	0.000190416	-0.174905	-0.0539911	0.120913	0	0	0	0.0844363	0.10053	0.115139	0.111626	0.11263	0.116131	-0.0302844	-0.0107341	-0.0809454	-0.0361145	-0.0844721	-0.130481	-0.104059	0.0571928	0.0519033	0.0491765
A0A0A0MSS8	AKR1C3	Aldo-keto reductase family 1 member C3 OS=Homo sapiens GN=AKR1C3 PE=1 SV=1	30.3406	7	21	4	0	3	323	36.8	4.56074e-07	-0.0623642	-0.214787	0.376011	0.0135025	1.12518e-05	2.98985e-07	-0.152423	0.438375	0.590798	0	1	1	-0.070465	-0.0823304	-0.097311	-0.0501464	-0.0475044	-0.0264282	-0.290375	-0.280412	-0.352859	-0.305546	-0.0753405	-0.108305	-0.0906709	0.367179	0.383647	0.377207
O60279	SUSD5	Sushi domain-containing protein 5 OS=Homo sapiens GN=SUSD5 PE=1 SV=3	16.8521	7	14	7	3	0	629	68	4.58588e-07	0.187882	-0.310349	0.141016	6.60701e-07	0.754299	2.11942e-05	-0.498231	-0.0468663	0.451365	1	0	1	0.214569	0.195589	0.133983	0.201814	0.187005	0.194332	-0.294058	-0.256107	-0.187484	-0.121346	-0.452449	-0.457247	-0.403754	0.162051	0.134193	0.126803
Q9NR19-2	ACSS2	Isoform 2 of Acetyl-coenzyme A synthetase, cytoplasmic OS=Homo sapiens GN=ACSS2	38.5154	26	126	26	0	0	714	80	4.61133e-07	-0.250834	0.195045	-0.20025	6.2308e-07	0.663635	2.51931e-05	0.44588	0.0505844	-0.395295	1	0	1	-0.283153	-0.246684	-0.255613	-0.208246	-0.257878	-0.253433	0.187064	0.184218	0.0838985	0.00939103	0.323684	0.312973	0.264088	-0.209017	-0.220559	-0.171175
Q14674	ESPL1	Separin OS=Homo sapiens GN=ESPL1 PE=1 SV=3	34.1981	54	143	54	7	0	2120	233	4.61514e-07	-0.15807	0.0819958	-0.0130805	3.0272e-07	0.00069984	0.0137806	0.240066	0.14499	-0.0950763	0	0	0	-0.185576	-0.181191	-0.209854	-0.146972	-0.122704	-0.102124	0.0984093	0.133186	0.0337133	0.0237056	0.0764487	0.0614371	0.14707	0.00236995	-0.0222214	-0.01939
Q15067-2	ACOX1	Isoform 2 of Peroxisomal acyl-coenzyme A oxidase 1 OS=Homo sapiens GN=ACOX1	70	33	256	33	0	0	660	74.6	4.62344e-07	-0.185189	0.109585	-0.0513218	3.07044e-07	0.00661603	0.00135536	0.294774	0.133867	-0.160907	0	0	0	-0.197728	-0.169645	-0.241389	-0.183512	-0.169021	-0.149837	0.040927	0.0527637	0.0747413	0.0534644	0.184911	0.170217	0.190073	-0.0513507	-0.0398134	-0.0628012
Q9H488	POFUT1	GDP-fucose protein O-fucosyltransferase 1 OS=Homo sapiens GN=POFUT1 PE=1 SV=1	58.7629	15	97	15	8	0	388	43.9	4.62957e-07	-0.109722	0.0745663	-0.0696742	4.60897e-07	0.233576	6.88594e-05	0.184289	0.0400481	-0.144241	0	0	0	-0.0723576	-0.137621	-0.150279	-0.142528	-0.0735443	-0.0820043	0.0427185	0.135213	0.0407842	0.0715507	0.0929396	0.0508225	0.0879359	-0.0693052	-0.0617212	-0.0779963
O00170	AIP	AH receptor-interacting protein OS=Homo sapiens GN=AIP PE=1 SV=2	62.7273	22	183	22	4	0	330	37.6	4.65486e-07	0.12854	-0.130972	0.0693379	4.50709e-07	0.203795	7.75904e-05	-0.259511	-0.0592017	0.20031	0	0	0	0.12548	0.118579	0.1056	0.170402	0.135787	0.115389	-0.0798728	-0.0594872	-0.0850585	-0.127941	-0.156661	-0.16282	-0.244961	0.0620837	0.0569616	0.0889685
P45983-4	MAPK8	Isoform 4 of Mitogen-activated protein kinase 8 OS=Homo sapiens GN=MAPK8	41.2178	13	35	8	0	0	427	48.1	4.65619e-07	0.158249	-0.0775247	0.0021514	3.20455e-07	0.000321336	0.0351024	-0.235774	-0.156097	0.0796761	0	0	0	0.212711	0.0987891	0.118677	0.20783	0.198178	0.113308	-0.0715229	-0.105267	-0.081953	-0.13258	-0.0230045	-0.0587838	-0.0695609	-0.00899132	0.00724962	0.00819591
Q9UBB9	TFIP11	Tuftelin-interacting protein 11 OS=Homo sapiens GN=TFIP11 PE=1 SV=1	48.5066	42	170	42	20	0	837	96.8	4.6722e-07	-0.0715776	0.0137165	0.0360223	2.02545e-06	2.20279e-06	0.187233	0.0852941	0.1076	0.0223057	0	0	0	-0.0747012	-0.0748619	-0.0936185	-0.0845988	-0.0520562	-0.0496291	0.0180298	0.0274868	-0.0164069	0.00608099	0.0088338	0.00869897	0.0432923	0.039876	0.0449388	0.0232521
Q99623	PHB2	Prohibitin-2 OS=Homo sapiens GN=PHB2 PE=1 SV=2	83.612	30	674	30	0	0	299	33.3	4.70502e-07	-0.0726194	0.0695675	-0.116266	3.53996e-06	0.143004	1.97347e-06	0.142187	-0.0436462	-0.185833	0	0	0	-0.0543034	-0.100021	-0.0383678	-0.0726769	-0.0819	-0.0884471	0.0840783	0.0326073	0.0942299	-0.0019634	0.0928972	0.079312	0.105811	-0.11329	-0.12465	-0.110857
Q9C091	GREB1L	GREB1-like protein OS=Homo sapiens GN=GREB1L PE=2 SV=2	13.8326	22	39	20	0	2	1923	214.2	4.71747e-07	-0.166841	0.0903182	-0.0675497	3.36056e-07	0.0196613	0.000529295	0.257159	0.0992915	-0.157868	0	0	0	-0.219737	-0.141632	-0.208568	-0.169664	-0.127478	-0.133968	0.0464262	0.0588614	0.0274512	0.120046	0.106451	0.101217	0.171775	-0.0270213	-0.067469	-0.108159
Q9H5J4	ELOVL6	Elongation of very long chain fatty acids protein 6 OS=Homo sapiens GN=ELOVL6 PE=1 SV=1	16.9811	3	10	3	0	0	265	31.4	4.74895e-07	-0.266324	0.243399	-0.184964	5.55512e-07	0.44854	3.94905e-05	0.509723	0.0813599	-0.428363	1	0	1	-0.337716	-0.262028	-0.282078	-0.238976	-0.266921	-0.210226	0.0942681	0.182806	0.0581171	0.334118	0.348212	0.364345	0.321928	-0.16101	-0.212185	-0.181697
Q9Y2Z9	COQ6	Ubiquinone biosynthesis monooxygenase COQ6 OS=Homo sapiens GN=COQ6 PE=1 SV=2	33.1197	12	32	12	0	0	468	50.8	4.75249e-07	0.133961	-0.148436	0.0802762	5.09125e-07	0.324889	5.32566e-05	-0.282397	-0.0536848	0.228712	0	0	0	0.128965	0.121258	0.134348	0.138263	0.133172	0.147759	-0.234394	-0.139242	-0.143379	-0.105853	-0.165793	-0.230577	-0.0198118	0.0859704	0.0863979	0.0684602
Q9BZD4	NUF2	Kinetochore protein Nuf2 OS=Homo sapiens GN=NUF2 PE=1 SV=2	59.0517	25	92	25	5	0	464	54.3	4.80497e-07	0.161729	-0.131614	0.0748392	3.98159e-07	0.0795399	0.000171805	-0.293343	-0.0868894	0.206454	0	0	0	0.250767	0.12002	0.2642	0.12446	0.114455	0.0964684	-0.142879	-0.188338	-0.123247	-0.0806605	-0.141715	-0.130516	-0.113946	0.0758388	0.0648577	0.0838212
Q8IZ83	ALDH16A1	Aldehyde dehydrogenase family 16 member A1 OS=Homo sapiens GN=ALDH16A1 PE=1 SV=2	43.8903	28	137	28	0	0	802	85.1	4.84212e-07	0.0585189	-0.0459788	0.0512933	7.59358e-07	0.86043	1.80954e-05	-0.104498	-0.0072256	0.0972721	0	0	0	0.0751732	0.0513646	0.0471392	0.0436673	0.0605964	0.0731725	-0.0764474	-0.036341	-0.0289786	-0.0677734	-0.0116388	-0.0565279	-0.0441447	0.0661665	0.0264008	0.0613124
Q9BW71	HIRIP3	HIRA-interacting protein 3 OS=Homo sapiens GN=HIRIP3 PE=1 SV=3	29.6763	16	54	9	2	7	556	61.9	4.84463e-07	0.152458	-0.189308	0.0893118	5.26784e-07	0.346012	5.1341e-05	-0.341766	-0.0631467	0.27862	0	0	0	0.130381	0.163306	0.165316	0.177756	0.148763	0.129229	-0.0577784	-0.117659	-0.144861	-0.315848	-0.222426	-0.236749	-0.229834	0.0797665	0.0635881	0.124581
Q8N108-12	MIER1	Isoform 2 of Mesoderm induction early response protein 1 OS=Homo sapiens GN=MIER1	44.7788	18	77	18	0	0	565	63.4	4.86139e-07	0.0862478	-0.121706	0.0868428	9.92171e-07	0.999751	1.04974e-05	-0.207954	0.000594991	0.208549	0	0	0	0.0809755	0.0760267	0.0642801	0.0901257	0.104496	0.101583	-0.179386	-0.114385	-0.192196	-0.0508986	-0.0644593	-0.139233	-0.111386	0.114951	0.0507632	0.0948139
Q6P1L8	MRPL14	39S ribosomal protein L14, mitochondrial OS=Homo sapiens GN=MRPL14 PE=1 SV=1	40.6897	5	35	5	5	0	145	15.9	4.90853e-07	0.211927	-0.0824788	-0.0985561	9.11035e-07	7.31989e-06	0.90865	-0.294406	-0.310483	-0.0160773	0	1	0	0.211541	0.185782	0.195534	0.199888	0.254328	0.224489	-0.125573	-0.156027	-0.158928	0.0618277	-0.0798271	-0.0903674	-0.0284564	-0.0981231	-0.0861243	-0.111421
Q8IY37	DHX37	Probable ATP-dependent RNA helicase DHX37 OS=Homo sapiens GN=DHX37 PE=1 SV=1	49.4382	51	188	51	9	0	1157	129.5	4.97093e-07	-0.112802	0.0580306	-0.00525767	3.31949e-07	0.000520822	0.0215642	0.170832	0.107544	-0.0632882	0	0	0	-0.150007	-0.0863483	-0.144512	-0.104358	-0.0979405	-0.093645	0.0466742	0.0426125	0.0329682	0.0346388	0.035634	0.0870029	0.126683	0.000289248	-0.00893959	-0.00712267
Q5TA45	CPSF3L	Integrator complex subunit 11 OS=Homo sapiens GN=CPSF3L PE=1 SV=2	39	17	71	16	0	0	600	67.6	5.00528e-07	0.0706804	-0.0853636	0.0864249	1.51209e-06	0.755287	5.70661e-06	-0.156044	0.0157445	0.171788	0	0	0	0.0521184	0.076347	0.0401697	0.0603717	0.0788877	0.116188	-0.0703848	-0.102558	-0.156314	-0.0484197	-0.0953269	-0.0764032	-0.0481385	0.0807064	0.0772584	0.10131
Q9BQC6	MRPL57	Ribosomal protein 63, mitochondrial OS=Homo sapiens GN=MRPL57 PE=1 SV=1	31.3725	3	10	3	3	0	102	12.3	5.03006e-07	0.248344	-0.174864	-0.114648	4.98218e-07	3.73539e-05	0.502553	-0.423207	-0.362992	0.0602154	0	1	0	0.347365	0.190736	0.141456	0.232439	0.349254	0.228812	-0.273884	-0.183509	-0.0915598	-0.201609	-0.0696177	-0.256444	-0.147421	-0.12403	-0.0683558	-0.151558
P56181-2	NDUFV3	Isoform 2 of NADH dehydrogenase [ubiquinone] flavoprotein 3, mitochondrial OS=Homo sapiens GN=NDUFV3	52.2199	21	119	20	20	1	473	51	5.04618e-07	0.0437302	-0.0816398	0.0854917	4.26792e-06	0.11392	1.91021e-06	-0.12537	0.0417616	0.167132	0	0	0	0.0203919	0.0558627	0.00642648	0.0402612	0.0844566	0.0549821	-0.0969971	-0.0850204	-0.097271	-0.0465926	-0.0838894	-0.121918	-0.0397903	0.0939546	0.0975448	0.0649758
Q969Z0	TBRG4	Protein TBRG4 OS=Homo sapiens GN=TBRG4 PE=1 SV=1	47.3851	22	176	22	0	0	631	70.7	5.04795e-07	-0.116446	0.124152	-0.0913338	7.02136e-07	0.710469	2.52426e-05	0.240598	0.0251122	-0.215485	0	0	0	-0.150878	-0.0783008	-0.140365	-0.112243	-0.103537	-0.113353	0.0869761	0.0822375	0.0889065	0.254981	0.112527	0.128273	0.11516	-0.0717051	-0.099893	-0.102403
P78364	PHC1	Polyhomeotic-like protein 1 OS=Homo sapiens GN=PHC1 PE=1 SV=3	23.8048	14	62	14	0	0	1004	105.5	5.06043e-07	-0.147708	0.0992344	-0.0700133	4.04461e-07	0.0615846	0.000223664	0.246942	0.0776943	-0.169248	0	0	0	-0.131556	-0.177338	-0.192388	-0.109954	-0.142836	-0.132173	0.0348634	0.0477358	0.0645082	0.183082	0.143122	0.0875752	0.133754	-0.0647964	-0.0454641	-0.0997794
Q92995	USP13	Ubiquitin carboxyl-terminal hydrolase 13 OS=Homo sapiens GN=USP13 PE=1 SV=2	48.8992	36	170	34	2	0	863	97.3	5.07678e-07	0.125374	-0.121908	0.0950908	6.65819e-07	0.625001	2.97396e-05	-0.247282	-0.0302834	0.216999	0	0	0	0.0805927	0.115429	0.176412	0.112209	0.116766	0.150836	-0.0502031	-0.057104	-0.0793624	-0.153647	-0.169796	-0.183577	-0.15967	0.104509	0.063007	0.117757
G5E9Y1	APBB2	Amyloid beta (A4) protein-binding, family B, member 2 (Fe65-like), isoform CRA_c OS=Homo sapiens GN=APBB2 PE=1 SV=1	31.0719	14	36	13	0	0	737	80.9	5.08175e-07	0.12363	-0.065867	0.0253314	3.27825e-07	0.00259177	0.00380649	-0.189497	-0.0982989	0.0911983	0	0	0	0.0831111	0.142451	0.110685	0.127768	0.174667	0.103099	-0.0613933	-0.0596901	-0.106298	-0.0732724	-0.111597	-0.0375822	-0.0112358	0.0508618	0.0220511	0.00308117
Q96QR8	PURB	Transcriptional activator protein Pur-beta OS=Homo sapiens GN=PURB PE=1 SV=3	58.3333	13	81	11	11	0	312	33.2	5.09501e-07	0.124453	-0.131352	0.111185	8.48748e-07	0.919964	1.65089e-05	-0.255805	-0.0132687	0.242537	0	0	0	0.192113	0.124936	0.118125	0.0977635	0.0764846	0.137298	-0.0914778	-0.0923311	-0.0737202	-0.0888681	-0.169352	-0.177829	-0.225886	0.122361	0.0802495	0.130944
Q8IWA0	WDR75	WD repeat-containing protein 75 OS=Homo sapiens GN=WDR75 PE=1 SV=1	54.3373	39	287	39	32	0	830	94.4	5.12595e-07	-0.0675985	0.0626779	-0.065246	9.65962e-07	0.990106	1.28289e-05	0.130276	0.00235248	-0.127924	0	0	0	-0.102456	-0.0357946	-0.0930416	-0.0532623	-0.0486514	-0.0723857	0.0542703	0.0660137	0.0640948	0.009278	0.0777367	0.0805838	0.0867679	-0.0644338	-0.0507137	-0.0805906
Q76FK4	NOL8	Nucleolar protein 8 OS=Homo sapiens GN=NOL8 PE=1 SV=1	52.8706	55	208	54	0	0	1167	131.5	5.16757e-07	-0.0809463	0.0525274	-0.0443364	4.48554e-07	0.112034	0.000141283	0.133474	0.0366099	-0.0968638	0	0	0	-0.0993055	-0.0798975	-0.109506	-0.0634428	-0.044644	-0.0888825	0.0599619	0.0592763	0.066989	0.00544737	0.046876	0.0422838	0.0868575	-0.0440034	-0.0265995	-0.0624062
Q86VN1	VPS36	Vacuolar protein-sorting-associated protein 36 OS=Homo sapiens GN=VPS36 PE=1 SV=1	70.7254	27	89	27	2	0	386	43.8	5.21001e-07	0.0643945	-0.0639763	0.0295394	4.55008e-07	0.116804	0.000137821	-0.128371	-0.0348552	0.0935157	0	0	0	0.051822	0.0560423	0.0683061	0.0874615	0.0623835	0.0603519	-0.0712301	-0.0517949	-0.0499004	-0.0127964	-0.0678754	-0.0980107	-0.0962262	0.0478494	0.0318066	0.00896211
Q9UGJ1	TUBGCP4	Gamma-tubulin complex component 4 OS=Homo sapiens GN=TUBGCP4 PE=1 SV=1	51.8741	27	75	27	0	0	667	76	5.24124e-07	0.155314	-0.0626458	-0.0762328	1.00024e-06	7.38936e-06	0.884673	-0.217959	-0.231546	-0.013587	0	0	0	0.143831	0.173219	0.143213	0.155562	0.142211	0.173845	-0.0717397	-0.0220294	-7.45438e-05	-0.176001	-0.02043	-0.0926116	-0.0556344	-0.0813044	-0.079673	-0.0677208
Q02809-2	PLOD1	Isoform 2 of Procollagen-lysine,2-oxoglutarate 5-dioxygenase 1 OS=Homo sapiens GN=PLOD1	51.0336	37	270	36	0	0	774	88.2	5.25208e-07	-0.147205	0.133501	-0.121535	7.62412e-07	0.770742	2.34253e-05	0.280707	0.0256702	-0.255036	0	0	0	-0.162317	-0.163204	-0.214708	-0.142762	-0.108493	-0.0917498	0.0741885	0.0880693	0.06372	0.159829	0.152912	0.159069	0.236721	-0.0870785	-0.113585	-0.163942
P11047	LAMC1	Laminin subunit gamma-1 OS=Homo sapiens GN=LAMC1 PE=1 SV=3	53.3872	75	373	75	71	0	1609	177.5	5.3647e-07	-0.342508	0.252668	-0.313163	9.01339e-07	0.928081	1.69593e-05	0.595177	0.0293447	-0.565832	1	0	1	-0.369369	-0.345614	-0.398109	-0.328905	-0.290543	-0.322508	0.122503	0.112261	0.131498	0.13184	0.389562	0.420511	0.460504	-0.319009	-0.285994	-0.334487
Q9H098-2	FAM107B	Isoform 2 of Protein FAM107B OS=Homo sapiens GN=FAM107B	24.8366	9	27	8	0	0	306	34.7	5.38943e-07	0.296728	-0.178232	-0.0218127	3.74711e-07	0.000322847	0.0428449	-0.47496	-0.318541	0.156419	1	1	0	0.266045	0.321916	0.342457	0.306389	0.26095	0.282614	-0.155897	-0.105627	-0.0547444	-0.0621167	-0.282838	-0.364566	-0.221834	0.018354	-0.0321616	-0.0516305
Q9ULW3	ABT1	Activator of basal transcription 1 OS=Homo sapiens GN=ABT1 PE=1 SV=1	56.9853	15	79	15	15	0	272	31.1	5.39479e-07	-0.0643124	0.0896391	-0.0907007	2.1974e-06	0.481638	4.15301e-06	0.153952	-0.0263883	-0.18034	0	0	0	-0.0594481	-0.0667003	-0.11453	-0.0619552	-0.0254634	-0.0577769	0.0937519	0.0814959	0.122463	0.139201	0.0704921	0.0376484	0.082422	-0.0939748	-0.0573824	-0.120745
O95825	CRYZL1	Quinone oxidoreductase-like protein 1 OS=Homo sapiens GN=CRYZL1 PE=1 SV=2	53.0086	15	44	15	0	0	349	38.7	5.42066e-07	0.0611952	-0.0820454	0.0574132	9.89597e-07	0.979073	1.43698e-05	-0.143241	-0.00378203	0.139459	0	0	0	0.0359702	0.0488966	0.0449918	0.0836619	0.096976	0.0566746	-0.045473	-0.0577251	-0.108456	-0.0468972	-0.103285	-0.0869424	-0.125539	0.0430228	0.0527107	0.076506
Q9Y617	PSAT1	Phosphoserine aminotransferase OS=Homo sapiens GN=PSAT1 PE=1 SV=2	71.8919	24	756	24	4	0	370	40.4	5.45374e-07	-0.0425138	0.109185	-0.199986	0.000106679	0.000695105	5.06237e-07	0.151698	-0.157472	-0.309171	0	0	0	-0.0473095	-0.0545049	-0.0324274	-0.030368	-0.0504215	-0.0400514	0.186017	0.146275	0.147214	0.146483	0.0514942	0.0748366	0.0119719	-0.207301	-0.223186	-0.169472
Q9BPU6	DPYSL5	Dihydropyrimidinase-related protein 5 OS=Homo sapiens GN=DPYSL5 PE=1 SV=1	69.1489	39	462	39	26	0	564	61.4	5.57047e-07	0.132544	-0.0953074	0.0314535	3.73318e-07	0.00869706	0.00133067	-0.227851	-0.10109	0.126761	0	0	0	0.123597	0.122459	0.148855	0.132297	0.138356	0.129698	-0.0407906	-0.0512786	-0.075998	-0.037034	-0.13576	-0.148788	-0.177503	0.0336475	0.0191583	0.0415548
Q969X6	CIRH1A	Cirhin OS=Homo sapiens GN=CIRH1A PE=1 SV=1	50.5831	28	203	28	0	0	686	76.8	5.62854e-07	-0.111296	0.0709868	-0.0438133	4.10114e-07	0.0275047	0.000490869	0.182283	0.0674827	-0.1148	0	0	0	-0.142834	-0.117202	-0.129797	-0.0945244	-0.0824906	-0.100929	0.0625834	0.0471073	0.0405818	0.156715	0.0396159	0.0563936	0.0939106	-0.0356116	-0.0400858	-0.0557426
Q9C0D5	TANC1	Protein TANC1 OS=Homo sapiens GN=TANC1 PE=1 SV=3	23.5357	37	68	36	0	0	1861	202.1	5.63234e-07	0.152023	-0.147678	0.0785645	5.22837e-07	0.171348	0.000109583	-0.299701	-0.0734585	0.226243	0	0	0	0.154268	0.10453	0.109765	0.170035	0.183297	0.190244	-0.195497	-0.200443	-0.213673	-0.18516	-0.0900489	-0.11003	-0.0388939	0.124853	0.0397728	0.0710675
P13797	PLS3	Plastin-3 OS=Homo sapiens GN=PLS3 PE=1 SV=4	74.127	43	657	33	0	16	630	70.8	5.6354e-07	-0.0653775	0.0779754	-0.0952832	2.69897e-06	0.361074	3.60073e-06	0.143353	-0.0299057	-0.173259	0	0	0	-0.0838597	-0.0572737	-0.0517806	-0.0595647	-0.0569692	-0.0828172	0.10129	0.0861951	0.0508976	0.0235886	0.12673	0.120008	0.0371187	-0.102761	-0.105282	-0.0778062
Q96C01	FAM136A	Protein FAM136A OS=Homo sapiens GN=FAM136A PE=1 SV=1	81.8841	11	104	11	1	0	138	15.6	5.64207e-07	-0.141128	0.0516567	-0.0150484	3.85385e-07	0.000415108	0.033705	0.192785	0.12608	-0.0667051	0	0	0	-0.187793	-0.157293	-0.141582	-0.103398	-0.109806	-0.146898	0.09621	0.0680553	0.0946374	0.005962	0.0369856	0.0309167	0.0288297	-0.0400845	0.0267315	-0.0317922
Q9C0I4	THSD7B	Thrombospondin type-1 domain-containing protein 7B OS=Homo sapiens GN=THSD7B PE=2 SV=2	8.83085	9	11	9	0	0	1608	179.3	5.73011e-07	-0.366754	0.16262	0.0686213	5.20206e-07	5.94357e-05	0.355662	0.529374	0.435375	-0.0939986	1	1	0	-0.353976	-0.569439	-0.45073	-0.332926	-0.281226	-0.212228	0.316455	0.181332	0.154302	0.0913113	0.114086	0.108938	0.171915	0.078532	0.101887	0.025445
P06703	S100A6	Protein S100-A6 OS=Homo sapiens GN=S100A6 PE=1 SV=1	26.6667	4	25	4	0	0	90	10.2	5.75951e-07	0.216076	-0.277562	0.155014	7.51691e-07	0.625304	3.36453e-05	-0.493637	-0.0610614	0.432576	1	0	1	0.168757	0.243969	0.23565	0.25586	0.173117	0.2191	-0.337311	-0.299507	-0.369881	-0.474169	-0.107449	-0.163386	-0.191228	0.153811	0.123551	0.187681
P30740	SERPINB1	Leukocyte elastase inhibitor OS=Homo sapiens GN=SERPINB1 PE=1 SV=1	61.7414	19	105	18	8	0	379	42.7	5.8132e-07	0.169187	-0.117323	-0.00979277	3.87041e-07	0.00062647	0.0215896	-0.28651	-0.17898	0.10753	0	0	0	0.129949	0.183203	0.222443	0.194024	0.129156	0.156346	-0.0486708	-0.0451013	-0.126311	-0.203806	-0.0744583	-0.133558	-0.189354	-0.0254797	-0.0219162	0.0180176
H0Y4B0	ERI3	ERI1 exoribonuclease 3 (Fragment) OS=Homo sapiens GN=ERI3 PE=1 SV=1	48.0392	9	68	9	1	0	204	22.9	5.83274e-07	0.177298	-0.150472	0.0214525	3.82509e-07	0.00546857	0.00217751	-0.327769	-0.155845	0.171924	0	0	0	0.173136	0.151603	0.17193	0.210818	0.182827	0.173473	-0.0827612	-0.100876	-0.12968	-0.0571227	-0.201194	-0.193078	-0.288589	0.0105062	0.00179794	0.0520535
Q9BUL8	PDCD10	Programmed cell death protein 10 OS=Homo sapiens GN=PDCD10 PE=1 SV=1	70.7547	14	148	14	0	0	212	24.7	5.85011e-07	0.106678	-0.0432382	-0.0365823	7.69231e-07	1.79587e-05	0.936712	-0.149916	-0.14326	0.00665597	0	0	0	0.143774	0.0918511	0.0809936	0.117744	0.0873111	0.118391	-0.0140574	-0.0207146	-0.012851	-0.07687	-0.0565411	-0.0243276	-0.0973059	-0.0412512	-0.0210079	-0.0474877
Q9BTF0	THUMPD2	THUMP domain-containing protein 2 OS=Homo sapiens GN=THUMPD2 PE=2 SV=2	29.6223	17	29	17	6	0	503	56.4	5.88224e-07	0.138308	-0.104095	-0.0253063	4.11177e-07	0.000327608	0.0475185	-0.242402	-0.163614	0.0787882	0	0	0	0.162949	0.102354	0.139557	0.11513	0.151045	0.158812	-0.0515062	-0.0362651	-0.0626799	-0.179012	-0.122938	-0.174125	-0.102135	-0.00216363	-0.0396516	-0.0341038
Q8WXX7	AUTS2	Autism susceptibility gene 2 protein OS=Homo sapiens GN=AUTS2 PE=1 SV=1	5.40111	6	9	6	0	0	1259	138.9	5.89838e-07	0.0220059	-0.227886	0.25859	7.83483e-05	0.00116742	5.98678e-07	-0.249892	0.236584	0.486475	0	0	1	-0.0378647	0.0239036	0.048743	0.0162075	-0.0084209	0.0894672	-0.218287	-0.408522	-0.256038	-0.249188	-0.141196	-0.156605	-0.165364	0.297261	0.194825	0.283684
P08582	MFI2	Melanotransferrin OS=Homo sapiens GN=MFI2 PE=1 SV=2	24.7967	14	25	14	10	0	738	80.2	5.92482e-07	0.147747	-0.124243	-0.00591982	3.83063e-07	0.00145911	0.00855183	-0.27199	-0.153667	0.118323	0	0	0	0.13071	0.121439	0.166578	0.187508	0.120576	0.159671	-0.140463	-0.0869402	-0.203963	-0.177194	-0.0176365	-0.150758	-0.0927458	0.0272692	-0.0108051	-0.0342236
Q9H6R0	DHX33	Putative ATP-dependent RNA helicase DHX33 OS=Homo sapiens GN=DHX33 PE=1 SV=2	40.5941	28	93	28	5	0	707	78.8	5.95044e-07	-0.0890457	0.0669897	-0.0626828	6.76413e-07	0.42158	5.26327e-05	0.156035	0.0263629	-0.129672	0	0	0	-0.109667	-0.106196	-0.0986781	-0.0942177	-0.0438367	-0.0816793	0.0431502	0.0723379	0.0255557	0.0824344	0.0791527	0.0538437	0.112453	-0.0296159	-0.0544182	-0.104014
Q96AA3	RFT1	Protein RFT1 homolog OS=Homo sapiens GN=RFT1 PE=1 SV=1	10.7209	8	29	8	0	0	541	60.3	5.96154e-07	-0.168669	0.154836	-0.153938	1.01388e-06	0.939479	1.81324e-05	0.323505	0.0147312	-0.308773	0	0	0	-0.192434	-0.186752	-0.127395	-0.139884	-0.169879	-0.195671	0.073034	0.108734	0.0628095	0.226725	0.201078	0.117906	0.293562	-0.147266	-0.16601	-0.148537
A0A087WX23	PEG10	Retrotransposon-derived protein PEG10 OS=Homo sapiens GN=PEG10 PE=1 SV=1	52.235	33	322	9	0	40	783	88.2	5.99206e-07	-0.263357	0.182005	-0.112626	4.59043e-07	0.0460283	0.000343489	0.445361	0.150731	-0.29463	1	0	0	-0.281049	-0.278725	-0.334054	-0.254843	-0.218452	-0.213017	0.127837	0.129696	0.0600411	0.0793797	0.245076	0.316518	0.315484	-0.0908929	-0.126997	-0.119988
Q04656-3	ATP7A	Isoform 2 of Copper-transporting ATPase 1 OS=Homo sapiens GN=ATP7A	21.7584	25	60	23	0	2	1581	172	6.0191e-07	0.0857548	-0.138648	0.0928865	1.36883e-06	0.971488	1.04792e-05	-0.224403	0.00713172	0.231535	0	0	0	0.0598613	0.0692503	0.108395	0.106332	0.0800956	0.0905944	-0.142306	-0.0750417	-0.0892997	-0.254864	-0.127884	-0.174647	-0.106496	0.11544	0.0805141	0.0827055
P01033	TIMP1	Metalloproteinase inhibitor 1 OS=Homo sapiens GN=TIMP1 PE=1 SV=1	37.6812	5	12	5	0	0	207	23.2	6.02429e-07	-0.25463	0.250568	-0.190402	7.7747e-07	0.611308	3.61069e-05	0.505198	0.0642278	-0.440971	1	0	1	-0.231354	-0.341211	-0.288996	-0.185225	-0.270536	-0.210459	0.0511141	0.119813	0.230807	0.28658	0.329957	0.334933	0.400773	-0.164085	-0.161173	-0.24595
Q9H4G0-2	EPB41L1	Isoform 2 of Band 4.1-like protein 1 OS=Homo sapiens GN=EPB41L1	36.9705	24	75	2	1	20	779	87.6	6.03585e-07	0.067139	-0.129121	0.0742796	1.3976e-06	0.962958	1.01887e-05	-0.196259	0.00714062	0.2034	0	0	0	0.0373173	0.0982508	0.0571352	0.0499757	0.0745118	0.0856431	-0.177451	-0.200033	-0.161607	-0.0713555	-0.0876553	-0.115748	-0.0899939	0.104253	0.0514618	0.0671237
Q5JTW2-2	CEP78	Isoform 2 of Centrosomal protein of 78 kDa OS=Homo sapiens GN=CEP78	47.9224	27	125	27	0	0	722	80	6.05851e-07	-0.0929307	-0.057507	0.225489	0.378777	6.67674e-07	1.93738e-06	0.0354236	0.31842	0.282996	0	1	0	-0.123784	-0.0704548	-0.147068	-0.094679	-0.070863	-0.0507351	-0.0399372	-0.00335308	-0.0499997	0.021324	-0.138487	-0.12376	-0.068336	0.238551	0.227673	0.210244
Q12996	CSTF3	Cleavage stimulation factor subunit 3 OS=Homo sapiens GN=CSTF3 PE=1 SV=1	66.2483	38	320	38	27	0	717	82.9	6.06596e-07	-0.0869181	0.0512142	0.0127154	4.51883e-07	0.000190277	0.0963151	0.138132	0.0996335	-0.0384988	0	0	0	-0.113397	-0.0766823	-0.109316	-0.0820013	-0.0678271	-0.0722845	0.0542516	0.0466359	-0.012792	0.0726644	0.0565149	0.0792835	0.0619411	0.0131072	0.0271071	-0.00206801
Q15031	LARS2	Probable leucine--tRNA ligase, mitochondrial OS=Homo sapiens GN=LARS2 PE=1 SV=2	61.6833	40	229	40	2	0	903	101.9	6.09849e-07	-0.0915872	0.0872993	-0.0504106	5.87174e-07	0.211814	9.98207e-05	0.178886	0.0411765	-0.13771	0	0	0	-0.119545	-0.0778729	-0.105424	-0.0958871	-0.0895077	-0.0612865	0.0579589	0.0763627	0.056296	0.173041	0.0638473	0.0667233	0.116866	-0.031958	-0.0558308	-0.0634431
Q8WUM4	PDCD6IP	Programmed cell death 6-interacting protein OS=Homo sapiens GN=PDCD6IP PE=1 SV=1	70.3917	59	522	1	0	82	868	96	6.16224e-07	0.0550266	-0.0694241	0.042088	8.56799e-07	0.720382	3.00778e-05	-0.124451	-0.0129387	0.111512	0	0	0	0.0259287	0.0522596	0.0522618	0.0838428	0.0761227	0.039744	-0.0472703	-0.0694165	-0.0955978	-0.0562378	-0.0441433	-0.0584128	-0.114891	0.0377136	0.0277398	0.0608105
O75396	SEC22B	Vesicle-trafficking protein SEC22b OS=Homo sapiens GN=SEC22B PE=1 SV=4	44.186	11	132	11	8	0	215	24.6	6.16432e-07	-0.228195	0.120988	-0.0566	4.01283e-07	0.00444015	0.00285946	0.349184	0.171595	-0.177588	0	0	0	-0.273704	-0.204267	-0.211634	-0.19804	-0.237415	-0.244112	0.0513154	0.0370307	0.0416045	0.277974	0.14279	0.150074	0.14613	-0.0448716	-0.0626681	-0.0622603
O15217	GSTA4	Glutathione S-transferase A4 OS=Homo sapiens GN=GSTA4 PE=1 SV=1	47.7477	10	50	10	3	0	222	25.7	6.20555e-07	0.14717	-0.140087	0.15607	1.40602e-06	0.973003	1.0838e-05	-0.287257	0.00890046	0.296157	0	0	0	0.124132	0.137567	0.134563	0.165187	0.142903	0.178669	-0.114757	-0.0817366	-0.0317949	-0.121059	-0.151963	-0.212558	-0.26674	0.124598	0.182476	0.161137
O15260	SURF4	Surfeit locus protein 4 OS=Homo sapiens GN=SURF4 PE=1 SV=3	6.69145	2	29	2	0	0	269	30.4	6.21246e-07	-0.156525	0.126142	-0.155064	1.22503e-06	0.999218	1.39403e-05	0.282667	0.00146088	-0.281206	0	0	0	-0.135496	-0.158093	-0.102738	-0.135649	-0.172828	-0.234347	0.116519	0.0866273	0.0567352	0.049049	0.197613	0.171291	0.20516	-0.197243	-0.150663	-0.117286
Q03112-3	MECOM	Isoform 2 of MDS1 and EVI1 complex locus protein EVI1 OS=Homo sapiens GN=MECOM	14.4471	15	30	11	0	4	1239	139.2	6.21957e-07	0.162159	-0.302471	0.227788	2.21488e-06	0.603702	5.57526e-06	-0.46463	0.0656287	0.530259	1	0	1	0.14446	0.17914	0.161805	0.142299	0.14748	0.19777	-0.422324	-0.233766	-0.267385	-0.545951	-0.176755	-0.302432	-0.168684	0.256629	0.199746	0.226989
P28676	GCA	Grancalcin OS=Homo sapiens GN=GCA PE=1 SV=2	62.6728	12	46	12	0	0	217	24	6.22096e-07	0.227532	-0.101322	-0.033094	5.28399e-07	8.71369e-05	0.254359	-0.328854	-0.260626	0.0682282	0	0	0	0.191081	0.232765	0.223193	0.231943	0.254507	0.231701	-0.181422	-0.133102	-0.225559	-0.101261	-0.00371676	-0.0288484	-0.0353467	-0.0289941	-0.0632373	-0.00705056
Q9H0B6	KLC2	Kinesin light chain 2 OS=Homo sapiens GN=KLC2 PE=1 SV=1	81.0289	49	258	38	0	13	622	68.9	6.24619e-07	0.0537321	-0.0888685	0.0856344	3.18667e-06	0.324019	3.70151e-06	-0.142601	0.0319023	0.174503	0	0	0	0.0400274	0.0338653	0.0325323	0.0740021	0.0862123	0.0557531	-0.0626365	-0.0639745	-0.110548	-0.0237207	-0.120869	-0.109124	-0.131207	0.0913743	0.0815981	0.0839307
P49189	ALDH9A1	4-trimethylaminobutyraldehyde dehydrogenase OS=Homo sapiens GN=ALDH9A1 PE=1 SV=3	68.6235	30	417	30	6	0	494	53.8	6.26151e-07	0.0756806	-0.0513245	0.0189297	4.18794e-07	0.00885932	0.00151268	-0.127005	-0.0567508	0.0702542	0	0	0	0.0975109	0.078875	0.110695	0.0661712	0.0570985	0.0437333	-0.0636271	-0.0476305	-0.044483	-0.00545564	-0.0528113	-0.0661124	-0.0791515	0.0258871	0.0148287	0.0160733
Q14019	COTL1	Coactosin-like protein OS=Homo sapiens GN=COTL1 PE=1 SV=3	79.5775	12	127	12	5	0	142	15.9	6.26462e-07	0.163317	-0.0442513	-0.101786	2.88081e-06	2.72845e-06	0.172805	-0.207568	-0.265103	-0.0575348	0	1	0	0.158029	0.148712	0.193908	0.181235	0.152339	0.145678	0.0473	0.0219021	-0.0587177	-0.0824012	-0.0339452	-0.0859838	-0.117913	-0.125668	-0.096024	-0.0836665
Q12906-7	ILF3	Isoform 7 of Interleukin enhancer-binding factor 3 OS=Homo sapiens GN=ILF3	69.3764	56	2254	51	0	11	898	95.7	6.3682e-07	-0.0736774	0.063798	-0.0222425	4.61617e-07	0.027449	0.000568142	0.137475	0.0514349	-0.0860405	0	0	0	-0.0818887	-0.0541569	-0.0930842	-0.0749324	-0.0785347	-0.0594678	0.0331076	0.0316766	0.0824727	0.124335	0.04408	0.0705057	0.060408	-0.016379	-0.0135073	-0.0368412
P78417	GSTO1	Glutathione S-transferase omega-1 OS=Homo sapiens GN=GSTO1 PE=1 SV=2	70.5394	17	217	17	0	0	241	27.5	6.36849e-07	0.173752	-0.179526	0.115544	7.32605e-07	0.443313	5.36574e-05	-0.353278	-0.0582077	0.29507	0	0	0	0.167931	0.173971	0.182368	0.188091	0.174631	0.155519	-0.091213	-0.0931584	-0.179029	-0.0888945	-0.223559	-0.244313	-0.336515	0.0911369	0.122077	0.133418
O75717	WDHD1	WD repeat and HMG-box DNA-binding protein 1 OS=Homo sapiens GN=WDHD1 PE=1 SV=1	63.7733	63	523	63	0	0	1129	125.9	6.45535e-07	0.102803	-0.103551	0.0364741	5.09697e-07	0.0611798	0.00029554	-0.206354	-0.0663286	0.140025	0	0	0	0.0745361	0.114513	0.0883838	0.115749	0.117958	0.105676	-0.0523846	-0.0527582	-0.0778606	-0.188502	-0.0909025	-0.103404	-0.159047	0.0342449	0.0340361	0.0411413
Q9Y3B8	REXO2	Oligoribonuclease, mitochondrial OS=Homo sapiens GN=REXO2 PE=1 SV=3	59.0717	12	77	12	0	0	237	26.8	6.47613e-07	0.164087	-0.0850585	-0.0134518	4.76185e-07	0.00022266	0.0867695	-0.249145	-0.177538	0.0716068	0	0	0	0.15422	0.157409	0.144893	0.190689	0.173574	0.163733	-0.0380396	-0.0542974	-0.0366495	-0.0205096	-0.156032	-0.110819	-0.179062	-0.0157507	-0.0237743	-0.000830351
P51805	PLXNA3	Plexin-A3 OS=Homo sapiens GN=PLXNA3 PE=1 SV=2	28.0599	41	88	32	32	0	1871	207.6	6.48056e-07	-0.224067	0.0858415	0.0827111	9.52933e-07	1.50709e-05	0.996729	0.309909	0.306779	-0.00313046	0	1	0	-0.227969	-0.250313	-0.259957	-0.216682	-0.217367	-0.172116	0.0531906	0.0891182	-0.0084163	0.142035	0.0720001	0.0357818	0.217181	0.151716	0.0497266	0.046691
Q9Y512	SAMM50	Sorting and assembly machinery component 50 homolog OS=Homo sapiens GN=SAMM50 PE=1 SV=3	57.5693	27	153	27	27	0	469	51.9	6.5057e-07	-0.137775	0.0833417	-0.0284817	4.2315e-07	0.0044001	0.00309161	0.221117	0.109294	-0.111823	0	0	0	-0.161668	-0.148371	-0.107181	-0.122295	-0.141401	-0.145737	0.0808526	0.0656795	0.00215849	0.187677	0.0894489	0.082543	0.0750325	-0.0239049	-0.0268076	-0.0347326
Q8N5J2-3	FAM63A	Isoform 3 of Protein FAM63A OS=Homo sapiens GN=FAM63A	14.3133	5	20	5	0	0	517	57	6.53069e-07	0.2695	-0.188546	0.130084	5.3261e-07	0.0788437	0.000243086	-0.458046	-0.139416	0.31863	1	0	0	0.25796	0.236523	0.341239	0.233262	0.207859	0.340155	-0.0819131	-0.134357	-0.139753	-0.379775	-0.237322	-0.229274	-0.117431	0.171937	0.0483291	0.169986
P33316	DUT	Deoxyuridine 5'-triphosphate nucleotidohydrolase, mitochondrial OS=Homo sapiens GN=DUT PE=1 SV=4	55.9524	17	315	17	0	0	252	26.5	6.54401e-07	0.191808	-0.11812	0.0240282	4.2205e-07	0.00219971	0.00630223	-0.309928	-0.16778	0.142148	0	0	0	0.179372	0.183835	0.227062	0.213968	0.130523	0.216091	-0.0975881	-0.100318	-0.067949	-0.0246719	-0.147868	-0.142818	-0.245623	0.0447355	-0.0209435	0.0482926
Q99719	SEPT5	Septin-5 OS=Homo sapiens GN=SEPT5 PE=1 SV=1	50.6775	18	58	17	0	1	369	42.8	6.58036e-07	0.0966296	-0.122601	0.131987	2.54917e-06	0.530026	5.2869e-06	-0.21923	0.0353573	0.254588	0	0	0	0.0885902	0.0959993	0.088355	0.0897909	0.0799102	0.137132	-0.11268	-0.0892528	-0.0593026	-0.0488197	-0.164297	-0.205435	-0.178419	0.169293	0.102446	0.124222
Q9NSB8-2	HOMER2	Isoform 2 of Homer protein homolog 2 OS=Homo sapiens GN=HOMER2	57.7259	17	57	15	1	0	343	39.4	6.62916e-07	0.197563	-0.203693	0.0596841	5.03604e-07	0.0444396	0.0003968	-0.401256	-0.137879	0.263377	0	0	0	0.178153	0.201108	0.203272	0.20492	0.203728	0.194198	-0.0947349	-0.0754015	-0.112896	-0.244954	-0.27696	-0.322026	-0.298877	0.0725282	0.058134	0.0483902
P29374	ARID4A	AT-rich interactive domain-containing protein 4A OS=Homo sapiens GN=ARID4A PE=1 SV=3	26.4121	24	55	21	0	0	1257	142.7	6.64791e-07	0.0842911	-0.129172	0.092551	1.55045e-06	0.958963	1.09764e-05	-0.213464	0.00825985	0.221723	0	0	0	0.0518503	0.0703803	0.037531	0.123415	0.123842	0.0987281	-0.166315	-0.118961	-0.139304	-0.0509358	-0.140647	-0.207452	-0.0805933	0.102434	0.0825697	0.0926494
Q13190	STX5	Syntaxin-5 OS=Homo sapiens GN=STX5 PE=1 SV=2	62.5352	18	84	18	0	0	355	39.6	6.66543e-07	-0.198652	0.115236	-0.14472	7.51023e-07	0.416326	5.97316e-05	0.313889	0.0539326	-0.259956	0	0	0	-0.167247	-0.24388	-0.218557	-0.173965	-0.171041	-0.217225	0.043942	0.0610856	0.00620312	0.115449	0.181054	0.18337	0.215549	-0.140662	-0.137297	-0.156201
P30626	SRI	Sorcin OS=Homo sapiens GN=SRI PE=1 SV=1	68.1818	15	301	15	0	0	198	21.7	6.71319e-07	0.171724	-0.175744	0.105875	7.19455e-07	0.347134	7.14227e-05	-0.347468	-0.0658494	0.281619	0	0	0	0.15835	0.179244	0.166375	0.189177	0.171095	0.166105	-0.106473	-0.0813105	-0.114387	-0.120431	-0.236984	-0.243493	-0.327126	0.0769107	0.11008	0.130635
Q9UBP0	SPAST	Spastin OS=Homo sapiens GN=SPAST PE=1 SV=1	50.8117	26	97	25	0	1	616	67.2	6.75138e-07	0.0377818	-0.058702	0.0506623	2.32079e-06	0.638194	6.28612e-06	-0.0964838	0.0128805	0.109364	0	0	0	0.032526	0.0320275	0.0438509	0.0426138	0.0390641	0.0366084	-0.00797748	-0.0580311	-0.0857995	-0.0582112	-0.0852892	-0.0488498	-0.0667557	0.0544259	0.0289955	0.0685656
A0A0A0MTC0	PRIMPOL	DNA-directed primase/polymerase protein OS=Homo sapiens GN=PRIMPOL PE=1 SV=1	14.4902	6	14	6	0	0	559	64.3	6.75446e-07	0.117395	-0.194998	0.139155	1.78194e-06	0.876766	9.13711e-06	-0.312394	0.0217597	0.334153	0	0	0	0.0630346	0.055545	0.0988122	0.114508	0.190484	0.181988	-0.160496	-0.200278	-0.323584	-0.0972787	-0.246465	-0.194612	-0.142275	0.154911	0.156839	0.105714
Q9NQ34	TMEM9B	Transmembrane protein 9B OS=Homo sapiens GN=TMEM9B PE=1 SV=1	19.697	4	13	2	1	0	198	22.5	6.84295e-07	-0.253357	0.122106	-0.0819657	4.54571e-07	0.00804811	0.0018467	0.375463	0.171391	-0.204071	0	0	0	-0.262025	-0.32153	-0.230247	-0.236303	-0.201284	-0.268754	0.0476611	0.113423	-0.0345216	0.194105	0.161392	0.162901	0.209779	-0.0405244	-0.0828199	-0.122553
O95747	OXSR1	Serine/threonine-protein kinase OSR1 OS=Homo sapiens GN=OXSR1 PE=1 SV=1	62.8083	28	254	23	6	10	527	58	6.8599e-07	0.135326	-0.08619	0.0501634	4.90446e-07	0.0242937	0.000688237	-0.221516	-0.0851625	0.136353	0	0	0	0.118792	0.139577	0.121226	0.159496	0.150313	0.122551	-0.0142638	-0.0344308	-0.05884	-0.0875439	-0.120292	-0.112331	-0.175628	0.0312675	0.055092	0.0641305
Q9Y5V0	ZNF706	Zinc finger protein 706 OS=Homo sapiens GN=ZNF706 PE=1 SV=1	23.6842	2	19	2	1	0	76	8.5	6.87039e-07	0.1335	-0.0468862	-0.0788244	2.05255e-06	4.81963e-06	0.439441	-0.180386	-0.212325	-0.0319382	0	0	0	0.13017	0.0878852	0.157412	0.11794	0.141295	0.1663	-0.0159105	-0.0161246	-0.106349	-0.0433041	-0.0176557	-0.0305707	-0.098289	-0.0282495	-0.117545	-0.090679
Q9BYD1	MRPL13	39S ribosomal protein L13, mitochondrial OS=Homo sapiens GN=MRPL13 PE=1 SV=1	63.4831	10	47	10	0	0	178	20.7	6.90846e-07	0.223768	-0.0600484	-0.103839	1.87954e-06	5.47998e-06	0.525366	-0.283816	-0.327607	-0.0437909	0	1	0	0.175495	0.257822	0.220512	0.202122	0.208392	0.278264	-0.154047	-0.0687948	-0.0367048	0.0623057	-0.0588753	-0.149383	-0.0148402	-0.0953772	-0.0879661	-0.128175
Q92616	GCN1L1	Translational activator GCN1 OS=Homo sapiens GN=GCN1L1 PE=1 SV=6	67.3531	168	1351	168	168	0	2671	292.6	6.94436e-07	0.110047	-0.0669766	0.0246435	4.54197e-07	0.00547777	0.00271303	-0.177024	-0.0854038	0.0916201	0	0	0	0.0941028	0.120924	0.098443	0.121388	0.11451	0.110916	-0.0230956	-0.0128294	-0.0365049	-0.0638216	-0.0955752	-0.108705	-0.128305	0.0154941	0.0266776	0.0317588
P42704	LRPPRC	Leucine-rich PPR motif-containing protein, mitochondrial OS=Homo sapiens GN=LRPPRC PE=1 SV=3	78.8379	104	1594	104	71	0	1394	157.8	6.97974e-07	-0.109828	0.0857379	-0.0472303	5.52556e-07	0.0643235	0.000309485	0.195566	0.062598	-0.132968	0	0	0	-0.129163	-0.0815486	-0.150622	-0.116373	-0.0852574	-0.0960059	0.0369334	0.0397235	0.0463559	0.146875	0.0889455	0.117382	0.12395	-0.0490373	-0.0329032	-0.0597503
Q15738	NSDHL	Sterol-4-alpha-carboxylate 3-dehydrogenase, decarboxylating OS=Homo sapiens GN=NSDHL PE=1 SV=2	73.9946	25	428	25	5	0	373	41.9	7.01949e-07	-0.194319	0.114552	-0.0718973	4.94361e-07	0.0204854	0.00081983	0.308871	0.122422	-0.186449	0	0	0	-0.196574	-0.191154	-0.262849	-0.184589	-0.151405	-0.179345	0.0176892	0.0698442	0.127783	0.0540637	0.178916	0.162062	0.191507	-0.097709	-0.0116815	-0.106301
P38432	COIL	Coilin OS=Homo sapiens GN=COIL PE=1 SV=1	36.9792	17	100	17	16	0	576	62.6	7.01962e-07	-0.112711	0.110278	-0.130327	1.92178e-06	0.846666	8.94257e-06	0.222989	-0.0176164	-0.240605	0	0	0	-0.127999	-0.0961953	-0.131667	-0.132004	-0.0830167	-0.105383	0.144305	0.217831	0.0780184	0.141087	0.104867	0.0482872	0.0375525	-0.115886	-0.136206	-0.13889
P51153	RAB13	Ras-related protein Rab-13 OS=Homo sapiens GN=RAB13 PE=1 SV=1	68.9655	17	176	13	8	3	203	22.8	7.1147e-07	0.0713103	-0.117771	0.0896804	2.09766e-06	0.781739	8.1225e-06	-0.189081	0.0183701	0.207451	0	0	0	0.0916454	0.0584421	0.0671367	0.0855996	0.0854971	0.039541	-0.136275	-0.161052	-0.153458	-0.00532853	-0.116568	-0.114434	-0.137281	0.0984963	0.102615	0.0679302
Q6P2P2	PRMT9	Putative protein arginine N-methyltransferase 9 OS=Homo sapiens GN=PRMT9 PE=2 SV=1	25.3254	18	37	18	2	0	845	94.4	7.17584e-07	0.108515	-0.0896973	0.0745317	8.0912e-07	0.42221	6.34668e-05	-0.198213	-0.0339835	0.164229	0	0	0	0.0987516	0.107306	0.0839527	0.129904	0.131006	0.100173	-0.132604	-0.0808219	-0.0680742	-0.00626915	-0.0972017	-0.114258	-0.128653	0.128715	0.0581615	0.0367183
Q86XP1	DGKH	Diacylglycerol kinase eta OS=Homo sapiens GN=DGKH PE=1 SV=1	28.4426	28	46	3	0	26	1220	134.8	7.23597e-07	0.200445	-0.0914264	0.0619628	4.75361e-07	0.00633525	0.00248404	-0.291871	-0.138482	0.153389	0	0	0	0.191824	0.168686	0.180509	0.228281	0.205244	0.228126	-0.077852	-0.0448953	-0.0149294	-0.0367482	-0.115995	-0.224199	-0.125366	0.0951414	0.0525936	0.0381534
F6S8M0	GNS	N-acetylglucosamine-6-sulfatase OS=Homo sapiens GN=GNS PE=1 SV=1	33.9041	14	101	14	0	0	584	65.7	7.23721e-07	-0.115957	0.0420985	0.00841914	6.07633e-07	0.000105241	0.245287	0.158055	0.124376	-0.0336793	0	0	0	-0.136369	-0.104299	-0.15369	-0.116584	-0.100383	-0.0844162	0.0253834	0.0149046	-0.00161809	0.0841048	0.0319118	0.0498314	0.0901715	0.022618	0.00962515	-0.00698577
Q16134	ETFDH	Electron transfer flavoprotein-ubiquinone oxidoreductase, mitochondrial OS=Homo sapiens GN=ETFDH PE=1 SV=2	43.7601	22	83	22	1	0	617	68.5	7.25383e-07	0.170371	-0.144817	0.156824	1.24185e-06	0.947711	2.12569e-05	-0.315188	-0.0135462	0.301641	0	0	0	0.167909	0.173591	0.159808	0.170441	0.16523	0.185245	-0.175208	-0.161707	-0.0866713	-0.0364955	-0.236155	-0.264661	-0.052822	0.181263	0.143981	0.145229
P49759-3	CLK1	Isoform 3 of Dual specificity protein kinase CLK1 OS=Homo sapiens GN=CLK1	21.2928	8	15	7	0	1	526	61.7	7.25414e-07	-0.157622	0.128311	-0.0213293	4.75988e-07	0.00613844	0.00256854	0.285933	0.136293	-0.14964	0	0	0	-0.15351	-0.156258	-0.232865	-0.091907	-0.142037	-0.169153	0.11962	0.0792438	0.0452965	0.229934	0.158958	0.170203	0.0949232	-0.0147677	-0.0225964	-0.0266237
Q13637	RAB32	Ras-related protein Rab-32 OS=Homo sapiens GN=RAB32 PE=1 SV=3	26.2222	5	8	4	4	0	225	25	7.27811e-07	-0.197147	0.366169	-0.656822	5.39145e-05	0.00284994	8.66754e-07	0.563317	-0.459675	-1.02299	1	1	1	-0.166847	-0.248014	-0.292348	-0.213206	-0.197077	-0.0653921	0.45365	0.63419	0.442832	0.545387	0.0969351	0.0997129	0.290475	-0.565556	-0.747888	-0.657023
A0AVI4	TMEM129	E3 ubiquitin-protein ligase TM129 OS=Homo sapiens GN=TMEM129 PE=1 SV=1	24.3094	5	7	5	2	0	362	40.4	7.35633e-07	-0.208056	0.18596	-0.179653	1.1367e-06	0.85879	2.70552e-05	0.394016	0.0284034	-0.365613	0	0	1	-0.138894	-0.27158	-0.268803	-0.213758	-0.178915	-0.176387	0.112267	0.194079	0.0581242	0.307998	0.132763	0.183346	0.313141	-0.201588	-0.123016	-0.214355
E7EV01	CAPN5	Calpain-5 OS=Homo sapiens GN=CAPN5 PE=1 SV=2	22.5	14	31	14	0	0	680	77.4	7.38557e-07	-0.198941	0.200485	-0.184162	1.29159e-06	0.961198	2.06479e-05	0.399426	0.0147787	-0.384647	0	0	1	-0.176558	-0.243378	-0.11253	-0.199071	-0.219131	-0.242975	0.114765	0.106558	0.0945977	0.20709	0.258665	0.239749	0.381969	-0.155004	-0.197654	-0.199828
B4DSP0	PEG10	HCG1642748, isoform CRA_b OS=Homo sapiens GN=PEG10 PE=1 SV=1	71.0723	25	297	1	0	0	401	45	7.39885e-07	-0.214838	0.143573	-0.114187	6.33313e-07	0.114649	0.000204718	0.358412	0.100651	-0.257761	0	0	0	-0.204124	-0.295357	-0.292011	-0.182296	-0.126706	-0.188537	0.0818403	0.0998313	0.0670704	0.100545	0.176403	0.222763	0.256559	-0.110731	-0.130501	-0.10133
Q15642-2	TRIP10	Isoform 2 of Cdc42-interacting protein 4 OS=Homo sapiens GN=TRIP10	57.2477	30	149	30	0	0	545	62.6	7.4243e-07	0.0720567	-0.0936075	0.0780317	1.70999e-06	0.964835	1.23743e-05	-0.165664	0.00597508	0.171639	0	0	0	0.0428134	0.075728	0.0654737	0.0594974	0.0768099	0.112018	-0.0604652	-0.0841611	-0.136853	-0.0260869	-0.102357	-0.101283	-0.144046	0.0989856	0.0500893	0.0850203
Q9Y2B0	CNPY2	Protein canopy homolog 2 OS=Homo sapiens GN=CNPY2 PE=1 SV=1	79.6703	14	86	14	0	0	182	20.6	7.43685e-07	-0.0948227	0.0820923	-0.0368113	5.80572e-07	0.058816	0.000357873	0.176915	0.0580114	-0.118904	0	0	0	-0.116033	-0.0804138	-0.106622	-0.0781104	-0.116835	-0.0709214	0.0372336	0.0483358	0.130036	0.137996	0.0835494	0.0677768	0.0697184	0.0029806	-0.0590924	-0.0543222
P39880-3	CUX1	Isoform 3 of Homeobox protein cut-like 1 OS=Homo sapiens GN=CUX1	47.2955	62	209	30	0	35	1516	165.6	7.49793e-07	0.122528	-0.169207	0.114051	1.3493e-06	0.976041	1.9723e-05	-0.291735	-0.00847698	0.283258	0	0	0	0.135451	0.0641762	0.101243	0.133477	0.17005	0.130769	-0.179614	-0.0353848	-0.188262	-0.159054	-0.127683	-0.239404	-0.255049	0.0900999	0.161781	0.090272
Q6PIW4	FIGNL1	Fidgetin-like protein 1 OS=Homo sapiens GN=FIGNL1 PE=1 SV=2	46.4392	21	82	19	0	0	674	74	7.52126e-07	0.0573876	-0.116505	0.0929221	3.49814e-06	0.390998	4.84252e-06	-0.173892	0.0355345	0.209427	0	0	0	0.0411506	0.0859243	0.0262173	0.0342738	0.0849783	0.0717812	-0.101688	-0.124248	-0.195471	-0.0498886	-0.154931	-0.110375	-0.0789292	0.109068	0.0812322	0.0884662
Q9BSC4	NOL10	Nucleolar protein 10 OS=Homo sapiens GN=NOL10 PE=1 SV=1	63.2267	36	216	36	0	0	688	80.3	7.53438e-07	-0.121113	0.110718	-0.0958106	1.02823e-06	0.705064	3.76248e-05	0.23183	0.0253019	-0.206529	0	0	0	-0.154792	-0.107152	-0.149907	-0.116008	-0.101283	-0.0975338	0.112554	0.14451	0.0973997	0.228282	0.0577666	0.0655812	0.0689317	-0.0951142	-0.0780453	-0.114272
Q9HD26-2	GOPC	Isoform 2 of Golgi-associated PDZ and coiled-coil motif-containing protein OS=Homo sapiens GN=GOPC	64.978	26	104	26	2	0	454	49.7	7.56657e-07	0.102456	-0.104588	0.0832086	1.08902e-06	0.776468	3.29318e-05	-0.207044	-0.0192477	0.187797	0	0	0	0.0865578	0.129348	0.067609	0.102774	0.122297	0.106152	-0.0191134	-0.0505535	-0.0799678	-0.140352	-0.150085	-0.144965	-0.147079	0.0843857	0.0694717	0.0957685
F8WA39	MTMR1	Myotubularin-related protein 1 OS=Homo sapiens GN=MTMR1 PE=1 SV=1	47.5483	26	105	24	0	0	673	75.7	7.64633e-07	0.0884127	-0.099543	0.0635238	9.68922e-07	0.598745	4.67504e-05	-0.187956	-0.0248889	0.163067	0	0	0	0.0821598	0.0796554	0.100235	0.0805336	0.0786937	0.109199	-0.0525657	-0.0657367	-0.0285507	-0.161042	-0.121847	-0.120651	-0.146408	0.0683838	0.0467519	0.0754357
P42773	CDKN2C	Cyclin-dependent kinase 4 inhibitor C OS=Homo sapiens GN=CDKN2C PE=1 SV=1	58.9286	9	69	9	9	0	168	18.1	7.67806e-07	0.0966678	-0.126344	0.109927	1.93861e-06	0.909661	1.09775e-05	-0.223012	0.0132594	0.236271	0	0	0	0.111737	0.0880149	0.0748026	0.0906717	0.0955273	0.119253	-0.0939322	-0.0916274	-0.115366	-0.239224	-0.123761	-0.17848	-0.0420192	0.11701	0.111699	0.101073
P47985	UQCRFS1	Cytochrome b-c1 complex subunit Rieske, mitochondrial OS=Homo sapiens GN=UQCRFS1 PE=1 SV=2	55.8394	12	148	12	3	0	274	29.6	7.68443e-07	0.222801	-0.0844431	-0.082707	1.14509e-06	1.70427e-05	0.999007	-0.307244	-0.305508	0.00173613	0	1	0	0.180269	0.219472	0.242809	0.213012	0.203924	0.277319	-0.121873	-0.118622	-0.0172159	0.0433066	-0.108725	-0.189049	-0.0789227	-0.0270684	-0.125043	-0.0960091
Q13616	CUL1	Cullin-1 OS=Homo sapiens GN=CUL1 PE=1 SV=2	65.2062	52	394	52	3	0	776	89.6	7.71454e-07	0.0758357	-0.0385612	-0.00808927	5.86636e-07	0.000200618	0.124036	-0.114397	-0.083925	0.0304719	0	0	0	0.0516959	0.0731493	0.0696601	0.097124	0.090694	0.0726907	-0.00817087	-0.0342029	-0.0396326	-0.0167094	-0.0519226	-0.0310461	-0.0882438	-0.00222695	-0.0196082	-0.00243269
Q9NYK5	MRPL39	39S ribosomal protein L39, mitochondrial OS=Homo sapiens GN=MRPL39 PE=1 SV=3	50.5917	19	100	19	2	0	338	38.7	7.7239e-07	0.115213	-0.0612709	-0.0842473	1.90239e-06	6.98081e-06	0.628723	-0.176484	-0.19946	-0.0229764	0	0	0	0.0838754	0.134314	0.0848664	0.0879718	0.123256	0.176995	-0.102693	-0.0977164	-0.0923798	-0.0368003	-0.0554912	-0.0480909	0.0042754	-0.0674685	-0.0872542	-0.0980192
Q96FC9-2	DDX11	Isoform 2 of Probable ATP-dependent RNA helicase DDX11 OS=Homo sapiens GN=DDX11	26.1589	19	46	4	0	16	906	101.6	7.87337e-07	-0.0450711	-0.087891	0.17441	0.15354	5.9995e-06	6.14555e-07	-0.04282	0.219481	0.262301	0	0	0	-0.0829403	-0.042991	-0.092416	-0.0572339	-0.0206418	0.0257966	-0.0999598	-0.0747298	-0.156927	-0.0459452	-0.111822	-0.0588807	-0.0669729	0.178846	0.147274	0.197111
Q02410	APBA1	Amyloid beta A4 precursor protein-binding family A member 1 OS=Homo sapiens GN=APBA1 PE=1 SV=3	35.9618	23	68	20	0	4	837	92.8	7.94115e-07	-0.137002	0.0690805	0.0140893	6.03453e-07	0.000206559	0.124338	0.206083	0.151092	-0.0549912	0	0	0	-0.170756	-0.137012	-0.146021	-0.13159	-0.17689	-0.0597443	0.0457343	0.0657856	0.0491225	0.102349	0.0425873	0.0709361	0.107049	0.0581595	-0.0429311	0.0270395
Q8NB90	SPATA5	Spermatogenesis-associated protein 5 OS=Homo sapiens GN=SPATA5 PE=1 SV=3	68.1971	49	308	48	5	1	893	97.8	7.94385e-07	0.0554778	-0.0586552	0.0313029	8.01271e-07	0.279664	0.000103235	-0.114133	-0.0241749	0.0899581	0	0	0	0.0402761	0.0434644	0.0415402	0.0648337	0.0826472	0.060105	-0.0344607	-0.026094	-0.071687	-0.0344501	-0.0749472	-0.0698755	-0.0990719	0.0240857	0.0342566	0.0355663
Q12981	BNIP1	Vesicle transport protein SEC20 OS=Homo sapiens GN=BNIP1 PE=1 SV=3	53.5088	13	80	13	0	0	228	26.1	7.9587e-07	-0.128713	0.117318	-0.107945	1.17819e-06	0.813419	3.21013e-05	0.246031	0.0207678	-0.225263	0	0	0	-0.154854	-0.125983	-0.135721	-0.125382	-0.090388	-0.139947	0.112987	0.153498	0.080356	0.250233	0.0839587	0.0575472	0.0826483	-0.0952463	-0.0969267	-0.131661
Q12792	TWF1	Twinfilin-1 OS=Homo sapiens GN=TWF1 PE=1 SV=3	65.1429	27	243	22	0	6	350	40.3	8.03146e-07	0.0407408	-0.0647791	0.0957705	1.57458e-05	0.0252486	1.67739e-06	-0.10552	0.0550298	0.16055	0	0	0	0.0123114	0.069442	0.041837	0.0362581	0.0353892	0.0492069	-0.0341051	-0.0689598	-0.082544	-0.0225263	-0.0794313	-0.0527115	-0.113176	0.101352	0.0694187	0.116541
P48449	LSS	Lanosterol synthase OS=Homo sapiens GN=LSS PE=1 SV=1	58.0601	39	254	39	0	0	732	83.3	8.0469e-07	-0.243027	0.184077	-0.203802	1.1618e-06	0.783255	3.4472e-05	0.427104	0.0392248	-0.387879	1	0	1	-0.266608	-0.247004	-0.27602	-0.208831	-0.215749	-0.24395	0.057155	0.0435264	0.087368	0.216818	0.270488	0.284617	0.328567	-0.200483	-0.214612	-0.196312
B7ZL88	COX18	COX18 protein OS=Homo sapiens GN=COX18 PE=1 SV=1	20.3593	7	21	7	0	0	334	37.1	8.04728e-07	-0.149718	0.106734	-0.130192	1.2251e-06	0.845873	3.03077e-05	0.256452	0.0195251	-0.236926	0	0	0	-0.167282	-0.154359	-0.162004	-0.116534	-0.116994	-0.181132	0.0587813	0.0105883	0.0487226	0.181671	0.14495	0.122608	0.179817	-0.15258	-0.108128	-0.129869
Q8NC54	KCT2	Keratinocyte-associated transmembrane protein 2 OS=Homo sapiens GN=KCT2 PE=2 SV=2	10.1887	3	10	3	3	0	265	29.2	8.05163e-07	-0.15993	0.0949125	-0.0553031	5.58118e-07	0.0177074	0.00109733	0.254842	0.104627	-0.150216	0	0	0	-0.215034	-0.167649	-0.183185	-0.124004	-0.173332	-0.0963755	0.122511	0.0874768	0.0677381	0.194831	0.0569704	0.0967855	0.0380754	-0.0456694	-0.093504	-0.0267359
Q9Y6Y0	IVNS1ABP	Influenza virus NS1A-binding protein OS=Homo sapiens GN=IVNS1ABP PE=1 SV=3	59.0343	28	121	28	18	0	642	71.7	8.06914e-07	0.0363188	0.0592788	-0.187783	0.525852	3.16235e-06	7.97024e-07	0.02296	-0.224102	-0.247062	0	0	0	0.0196304	-0.00909515	0.023191	0.0441539	0.0583383	0.0816944	0.07085	0.0698128	0.00275912	0.00267845	0.108685	0.110108	0.0500579	-0.174235	-0.215461	-0.173652
O75157	TSC22D2	TSC22 domain family protein 2 OS=Homo sapiens GN=TSC22D2 PE=1 SV=3	23.8462	12	49	9	0	0	780	79.2	8.10442e-07	-0.117806	0.128662	-0.0974081	1.20624e-06	0.820511	3.21895e-05	0.246468	0.0203977	-0.22607	0	0	0	-0.159856	-0.121991	-0.121417	-0.0876957	-0.133055	-0.0828216	0.188353	0.107155	0.112953	0.190974	0.0771003	0.130497	0.0936029	-0.0643182	-0.190816	-0.0370907
Q9ULX6	AKAP8L	A-kinase anchor protein 8-like OS=Homo sapiens GN=AKAP8L PE=1 SV=3	43.9628	28	217	11	0	29	646	71.6	8.10671e-07	-0.0962582	0.0469881	-0.0589842	7.26231e-07	0.155265	0.000175286	0.143246	0.0372741	-0.105972	0	0	0	-0.0840853	-0.0832717	-0.109216	-0.0660657	-0.0954788	-0.139431	0.0817726	0.082146	0.0521734	0.00570565	0.0504594	0.0307918	0.0258681	-0.0527959	-0.0402362	-0.0839204
P00403	MT-CO2	Cytochrome c oxidase subunit 2 OS=Homo sapiens GN=MT-CO2 PE=1 SV=1	40.9692	7	79	7	7	0	227	25.5	8.10764e-07	0.271912	-0.136146	0.00770056	5.51278e-07	0.000597774	0.0359265	-0.408057	-0.264211	0.143846	0	0	0	0.188762	0.277069	0.335257	0.332045	0.196441	0.301895	-0.2092	-0.135208	-0.0093219	-0.0493875	-0.132541	-0.252762	-0.164601	0.0276186	-0.0561449	0.0516279
Q9NUQ9	FAM49B	Protein FAM49B OS=Homo sapiens GN=FAM49B PE=1 SV=1	76.8519	22	206	20	0	4	324	36.7	8.15269e-07	0.16162	-0.163149	0.114084	9.89338e-07	0.538488	5.61103e-05	-0.324769	-0.0475361	0.277233	0	0	0	0.14278	0.138416	0.13065	0.188924	0.17179	0.197164	-0.0943506	-0.0582117	-0.0881391	-0.262565	-0.156657	-0.211341	-0.270776	0.0961762	0.130107	0.11597
[truncated: 8,947 more rows]

## Sheet: TMT Proteome Data Fig. 4
																		TTEST	TTEST	Hek293 WT	Hek293 WT	Hek293 WT	Hek293 WT	Ant Triple KO	Ant Triple KO	Ant Triple KO	Ant Triple KO	ANT2 KO	ANT2 KO	ANT2 KO	ANT2 KO
[truncated: 10,331 more rows]

[truncated: 5 more sheets: RNAseq SLC25A1, RNAseq SLC25A4, ClueGo Proteome SLC25A1 and 4, ClueGo RNASeq SLC25A1 and 4, 5XFAD Mitocarta Annotated]
